# Supplementary material
Source: publisher figshare collection journal article supplement (https://gsapubs.figshare.com/articles/dataset/_/12613640)
Supplement: Supplementary file 1 [file 1]

## Sheet: Fujian sub-basin
Table S3: U-Pb isotopic compositions and ages of detrital zircons from the Fujian sub-basin
	207Pb/206Pb		207Pb/235U		206Pb/238U			Th/U	207Pb/206Pb		207Pb/235U		206Pb/238U		Con.
Spot.	Ratio	1sigma	Ratio	1sigma	Ratio	1sigma	rho	Ratio	Age (Ma)	1sigma	Age (Ma)	1sigma	Age (Ma)	1sigma		Used age	1sigma	Reference
Luofengxi Fm, early Ordovician, N 25°50'57.56", E 116°19'18.1"
FJW1421-01	0.0721265	0.00123198	1.77824	0.0316383	0.1782	0.00137677	0.434239	0.367623	990.74	39.8175	1037.54	11.5636	1057.14	7.53284	6.28076	990.74	39.8175	Wang et al., 2018d
FJW1421-02	0.100056	0.00140505	4.16216	0.0615965	0.300409	0.00216807	0.487666	0.744174	1624.99	25.9225	1666.6	12.1164	1693.34	10.7476	4.03592	1624.99	25.9225	Wang et al., 2018d
FJW1421-03	0.199771	0.00264578	15.5655	0.215875	0.562207	0.00374664	0.480516	0.606521	2824.38	21.6025	2850.51	13.2328	2875.74	15.4605	1.78604	2824.38	21.6025	Wang et al., 2018d
FJW1421-04	0.0820889	0.00140065	2.57097	0.043996	0.226166	0.00172637	0.446058	0.539859	1247.83	33.335	1292.42	12.5106	1314.37	9.07617	5.06264	1247.83	33.335	Wang et al., 2018d
FJW1421-05	0.159172	0.00231097	10.6161	0.158994	0.481087	0.00371085	0.515032	0.862919	2446.6	25.1525	2490.12	13.8988	2532	16.1515	3.37276	2446.6	25.1525	Wang et al., 2018d
FJW1421-06	0.0572059	0.00120224	0.686331	0.0141189	0.0865503	0.000615179	0.345514	1.10531	498.19	46.29	530.593	8.50153	535.103	3.6498	0.842748	535.103	3.6498	Wang et al., 2018d
FJW1421-07	0.15453	0.00243312	9.22662	0.139846	0.430283	0.00281183	0.431148	0.270381	2398.15	31.9425	2360.76	13.8859	2306.99	12.6732	-3.95132	2398.15	31.9425	Wang et al., 2018d
FJW1421-08	0.0819783	0.00180864	1.98051	0.0428855	0.174217	0.00154345	0.409138	0.425757	1255.55	10.3425	1108.89	14.611	1035.3	8.4735	-21.2738	1255.55	10.3425	Wang et al., 2018d
FJW1421-09	0.0700544	0.00123612	1.55729	0.0272102	0.16008	0.00120093	0.429357	0.160599	931.48	35.1825	953.392	10.8043	957.22	6.67341	0.399899	957.22	6.67341	Wang et al., 2018d
FJW1421-10	0.0706267	0.00117257	1.66765	0.0278561	0.170215	0.00135775	0.477535	0.334398	946.29	33.335	996.29	10.6032	1013.3	7.47948	6.61267	946.29	33.335	Wang et al., 2018d
FJW1421-11	0.0907044	0.00147754	3.25132	0.0534576	0.258383	0.00179827	0.423293	0.421006	1440.43	31.4825	1469.49	12.7685	1481.56	9.21212	2.77622	1440.43	31.4825	Wang et al., 2018d
FJW1421-12	0.0794722	0.00132196	2.28164	0.0377845	0.207125	0.00135284	0.394411	0.244406	1183.34	32.8675	1206.62	11.6915	1213.48	7.2246	2.48429	1183.34	32.8675	Wang et al., 2018d
FJW1421-13	0.0711555	0.00142745	1.66424	0.0336371	0.169055	0.00143228	0.419176	0.938188	961.11	45.37	994.993	12.8203	1006.9	7.89789	4.54787	961.11	45.37	Wang et al., 2018d
FJW1421-14	0.0700267	0.00196873	1.60047	0.0455346	0.16587	0.00178436	0.378111	0.62457	929.32	58.495	970.392	17.7813	989.317	9.86622	6.06449	989.317	9.86622	Wang et al., 2018d
FJW1421-15	0.0701552	0.00129655	1.64907	0.0319391	0.169558	0.00120027	0.36549	0.128938	933.02	37.8075	989.196	12.2428	1009.68	6.61567	7.59227	933.02	37.8075	Wang et al., 2018d
FJW1421-16	0.0888682	0.00164487	3.29258	0.0622996	0.267574	0.00194816	0.384796	0.214694	1411.11	35.19	1479.3	14.7376	1528.48	9.90761	7.67869	1411.11	35.19	Wang et al., 2018d
FJW1421-17	0.158821	0.0042249	10.2725	0.27261	0.46748	0.00359014	0.28939	0.547844	2442.9	45.06	2459.63	24.5604	2472.5	15.771	1.19721	2442.9	45.06	Wang et al., 2018d
FJW1421-18	0.0674117	0.00121877	1.52131	0.0278677	0.163109	0.00108006	0.361483	0.229916	849.995	37.0375	939.003	11.2234	974.03	5.98615	3.59601	974.03	5.98615	Wang et al., 2018d
FJW1421-19	0.0741821	0.00135101	1.87869	0.0353077	0.182942	0.00128456	0.373616	0.724255	1055.56	37.0375	1073.6	12.4545	1083.03	7.00017	2.53616	1055.56	37.0375	Wang et al., 2018d
FJW1421-20	0.14514	0.00203466	8.49126	0.123922	0.422618	0.00262202	0.425119	0.506355	2300	24.07	2284.99	13.2581	2272.35	11.8814	-1.21672	2300	24.07	Wang et al., 2018d
FJW1421-21	0.0826922	0.00117082	2.62276	0.0378241	0.229289	0.0014618	0.442075	0.384054	1262.03	32.41	1307.04	10.6017	1330.77	7.66572	5.16566	1262.03	32.41	Wang et al., 2018d
FJW1421-22	0.067543	0.00105321	1.15487	0.0222066	0.123981	0.00139498	0.585142	0.506907	853.7	11.11	779.539	8.92008	753.436	8.00067	-3.46456	753.436	8.00067	Wang et al., 2018d
FJW1421-23	0.0723904	0.00120065	1.74738	0.0293313	0.17447	0.00113511	0.387593	0.213971	998.15	34.4175	1026.2	10.8407	1036.69	6.23039	3.71763	998.15	34.4175	Wang et al., 2018d
FJW1421-24	0.073666	0.0015493	1.87801	0.0404572	0.184248	0.00133142	0.33544	0.373787	1031.48	42.595	1073.36	14.2746	1090.14	7.24755	5.38029	1031.48	42.595	Wang et al., 2018d
FJW1421-25	0.162878	0.00290817	11.1652	0.203089	0.49576	0.00377739	0.418892	0.881693	2487.03	30.7125	2537.02	16.9526	2595.55	16.2798	4.18077	2487.03	30.7125	Wang et al., 2018d
FJW1421-26	0.060551	0.0013319	0.931346	0.0206609	0.111301	0.000840572	0.340439	0.516671	633.35	78.69	668.343	10.8626	680.297	4.87598	1.75724	680.297	4.87598	Wang et al., 2018d
FJW1421-27	0.104891	0.00186102	4.74585	0.0862088	0.328228	0.0034586	0.580079	0.643757	1722.22	33.33	1775.37	15.2356	1829.79	16.786	5.87857	1722.22	33.33	Wang et al., 2018d
FJW1421-28	0.0687253	0.00145573	1.45183	0.0319201	0.152855	0.00136595	0.406448	0.869885	900	72.225	910.632	13.2199	916.949	7.63796	0.688925	916.949	7.63796	Wang et al., 2018d
FJW1421-29	0.101662	0.00152297	4.51169	0.0707998	0.320936	0.00209949	0.416872	0.567373	1654.62	27.78	1733.13	13.0437	1794.3	10.2459	7.78432	1654.62	27.78	Wang et al., 2018d
FJW1421-30	0.141526	0.00214564	8.03928	0.12983	0.410584	0.00263495	0.397385	0.328783	2245.99	25.7725	2235.45	14.5849	2217.59	12.0418	-1.28064	2245.99	25.7725	Wang et al., 2018d
FJW1421-31	0.102714	0.00181616	4.61745	0.0889033	0.325129	0.00280765	0.44851	0.735847	1673.76	32.7175	1752.43	16.0711	1814.73	13.6585	7.76809	1673.76	32.7175	Wang et al., 2018d
FJW1421-32	0.0685759	0.00138383	1.54667	0.0324027	0.163152	0.00119866	0.35069	0.624421	887.035	42.5925	949.168	12.92	974.267	6.64323	2.57625	974.267	6.64323	Wang et al., 2018d
FJW1421-33	0.0703788	0.00222539	1.58523	0.048468	0.164433	0.00183048	0.364093	1.71763	938.885	65.28	964.425	19.0387	981.363	10.1337	4.32843	981.363	10.1337	Wang et al., 2018d
FJW1421-34	0.0690551	0.00150477	1.59543	0.0352782	0.167513	0.00146083	0.394389	0.41804	901.85	46.295	968.425	13.8024	998.392	8.06598	3.00151	998.392	8.06598	Wang et al., 2018d
FJW1421-35	0.0956841	0.00170654	3.96735	0.0732437	0.300568	0.00259282	0.467262	0.412006	1542.6	33.335	1627.54	14.9729	1694.12	12.8516	8.94407	1542.6	33.335	Wang et al., 2018d
FJW1421-36	0.0690174	0.00123084	1.56685	0.0277821	0.1646	0.00120871	0.414146	0.241436	898.15	69.4475	957.179	10.9904	982.288	6.69056	8.56555	982.288	6.69056	Wang et al., 2018d
FJW1421-37	0.150056	0.00206342	9.68899	0.140658	0.467132	0.00294135	0.433733	0.160013	2346.61	22.99	2405.66	13.3623	2470.97	12.924	5.03287	2346.61	22.99	Wang et al., 2018d
FJW1421-38	0.0676503	0.00104384	1.52842	0.0247736	0.163371	0.000982985	0.371216	0.0801416	857.4	37.195	941.864	9.94908	975.483	5.44687	3.44633	975.483	5.44687	Wang et al., 2018d
FJW1421-39	0.0609051	0.00192341	1.16719	0.0401795	0.138719	0.00138672	0.290395	0.668404	635.2	68.505	785.33	18.8273	837.416	7.85037	6.21991	837.416	7.85037	Wang et al., 2018d
FJW1421-40	0.0684916	0.00145537	1.52584	0.0317805	0.161498	0.0017294	0.514132	0.374977	883.33	44.445	940.829	12.7764	965.099	9.5983	8.4726	965.099	9.5983	Wang et al., 2018d
FJW1421-41	0.151433	0.00257021	10.2512	0.181619	0.489575	0.00394833	0.455206	1.48665	2362.04	29.01	2457.71	16.3919	2568.84	17.0872	8.05022	2362.04	29.01	Wang et al., 2018d
FJW1421-42	0.214873	0.0044199	16.4761	0.368068	0.552884	0.00452982	0.366752	0.691007	2942.9	33.335	2904.84	21.3884	2837.16	18.8045	-3.72704	2942.9	33.335	Wang et al., 2018d
FJW1421-43	0.0690684	0.00116124	1.56894	0.0273292	0.164094	0.00130052	0.454992	0.505769	901.85	67.595	958.008	10.8024	979.487	7.2019	7.92629	979.487	7.2019	Wang et al., 2018d
FJW1421-44	0.0942186	0.00148595	3.79722	0.0622566	0.290579	0.00199516	0.418788	0.956827	1522.22	29.6325	1592.16	13.178	1644.42	9.96579	7.43091	1522.22	29.6325	Wang et al., 2018d
FJW1421-45	0.0884596	0.00155774	3.26903	0.0576498	0.266472	0.00189669	0.403612	0.543943	1392.28	33.64	1473.71	13.7128	1522.87	9.65425	8.57531	1392.28	33.64	Wang et al., 2018d
FJW1421-46	0.06692	0.00156424	1.55113	0.0356463	0.167543	0.00146075	0.379387	0.510795	835.18	48.145	950.942	14.1886	998.558	8.06531	4.76846	998.558	8.06531	Wang et al., 2018d
FJW1421-47	0.109736	0.0019168	5.31797	0.0909077	0.348776	0.0023919	0.401183	0.398362	1794.75	32.5625	1871.76	14.6111	1928.75	11.432	6.94746	1794.75	32.5625	Wang et al., 2018d
FJW1421-48	0.145514	0.00282141	8.89905	0.170846	0.439728	0.00349517	0.414022	0.810399	2294.14	33.335	2327.7	17.526	2349.42	15.6497	2.35305	2294.14	33.335	Wang et al., 2018d
FJW1421-49	0.0690371	0.00150704	1.50413	0.0315655	0.156963	0.00121735	0.369566	0.302455	899.69	45.215	932.063	12.8	939.878	6.78289	0.831507	939.878	6.78289	Wang et al., 2018d
FJW1421-50	0.0687417	0.00117818	1.5947	0.0270623	0.167016	0.00120934	0.42668	0.0378583	900	36.2675	968.137	10.5907	995.65	6.68019	2.76327	995.65	6.68019	Wang et al., 2018d
FJW1421-51	0.159834	0.00252489	10.6805	0.166752	0.481459	0.00309091	0.411196	1.31178	2454.01	26.3875	2495.74	14.4967	2533.62	13.4498	3.14206	2454.01	26.3875	Wang et al., 2018d
FJW1421-52	0.1576	0.0032993	10.5767	0.231797	0.484629	0.00490608	0.461922	0.744839	2431.48	35.49	2486.67	20.3334	2547.4	21.3028	4.55045	2431.48	35.49	Wang et al., 2018d
FJW1421-53	0.0714881	0.00125168	1.57911	0.027509	0.159492	0.000988679	0.355838	0.227663	972.225	3.24	962.018	10.8306	953.955	5.49675	-0.845155	953.955	5.49675	Wang et al., 2018d
FJW1421-54	0.0912534	0.00223744	3.36948	0.0851368	0.267198	0.00270166	0.40017	0.601763	1453.71	46.2975	1497.33	19.7866	1526.56	13.7438	4.77231	1453.71	46.2975	Wang et al., 2018d
FJW1421-55	0.159589	0.00266732	10.2253	0.176089	0.46307	0.00313351	0.392941	0.444715	2451.54	22.9925	2455.37	15.9294	2453.1	13.8065	0.0635289	2451.54	22.9925	Wang et al., 2018d
FJW1421-56	0.167484	0.00311301	11.2165	0.215026	0.484412	0.00352839	0.379951	0.386269	2532.41	31.9425	2541.29	17.8739	2546.45	15.3229	0.551738	2532.41	31.9425	Wang et al., 2018d
FJW1421-57	0.0740672	0.00157637	1.67751	0.0354954	0.164188	0.00125489	0.361207	0.656386	1042.6	43.675	1000.04	13.4616	980.009	6.94865	-2.04363	980.009	6.94865	Wang et al., 2018d
FJW1421-58	0.0562871	0.00197678	0.650133	0.0215876	0.0846	0.000897837	0.319614	2.05398	464.86	77.77	508.561	13.2843	523.521	5.33637	2.85769	523.521	5.33637	Wang et al., 2018d
FJW1421-59	0.068444	0.00527828	1.33771	0.10649	0.142605	0.00315085	0.277552	0.366501	883.33	156.48	862.233	46.2861	859.377	17.7767	-2.78724	859.377	17.7767	Wang et al., 2018d
FJW1421-60	0.104493	0.00180757	4.46175	0.0784237	0.308707	0.00236099	0.435116	0.708584	1705.56	31.79	1723.89	14.5806	1734.34	11.6297	1.65982	1705.56	31.79	Wang et al., 2018d
																		Wang et al., 2018d
Lintian Fm, Cambrian, N 25°51'24.4", E 116°18'11.1"																		Wang et al., 2018d
FJW1428-01	0.292954	0.00438801	29.4021	0.450447	0.72304	0.00533356	0.481492	0.891481	3435.19	23.15	3467.04	15.0454	3507.43	19.9545	2.05969	3435.19	23.15	Wang et al., 2018d
FJW1428-02	0.0777381	0.00122885	2.14036	0.0338301	0.198272	0.001192	0.380362	0.619787	1140.44	31.4825	1161.94	10.9388	1166.03	6.41266	2.19462	1140.44	31.4825	Wang et al., 2018d
FJW1428-03	0.0975725	0.00342384	3.84788	0.124872	0.28603	0.0024012	0.258685	0.926506	1588.89	21.965	1602.82	17.4401	1621.66	12.0364	2.02088	1588.89	21.965	Wang et al., 2018d
FJW1428-04	0.101384	0.00159265	4.18642	0.0691981	0.297577	0.00263488	0.535686	0.79288	1649.99	29.63	1671.37	13.5482	1679.28	13.0902	1.7441	1649.99	29.63	Wang et al., 2018d
FJW1428-05	0.0712418	0.00124865	1.64586	0.0291334	0.166316	0.00113422	0.38527	0.284476	964.81	17.9788	987.963	11.1808	991.779	6.26902	0.384736	991.779	6.26902	Wang et al., 2018d
FJW1428-06	0.075239	0.0016698	1.80156	0.0382619	0.173083	0.00142048	0.386424	0.310385	1075.93	22.2212	1046.02	13.8683	1029.07	7.80592	-4.55331	1075.93	22.2212	Wang et al., 2018d
FJW1428-07	0.070443	0.00126732	1.56334	0.0279908	0.159711	0.00112676	0.394038	0.194101	942.59	17.9788	955.793	11.088	955.169	6.26326	-0.0653167	955.169	6.26326	Wang et al., 2018d
FJW1428-08	0.114608	0.00202037	5.10038	0.0872444	0.32036	0.00226408	0.413161	0.258327	1873.77	31.48	1836.17	14.5225	1791.48	11.054	-4.59312	1873.77	31.48	Wang et al., 2018d
FJW1428-09	0.265497	0.00468231	24.8237	0.439707	0.673648	0.00557657	0.467345	0.661506	3279.93	27.78	3301.31	17.2909	3319.94	21.4794	1.20519	3279.93	27.78	Wang et al., 2018d
FJW1428-10	0.0655078	0.00292119	1.4263	0.0589417	0.160681	0.00212442	0.319938	0.486664	790.74	47.2188	900.004	24.6713	960.558	11.799	6.3041	960.558	11.799	Wang et al., 2018d
FJW1428-11	0.0740808	0.00146614	1.94652	0.0381942	0.189926	0.00135302	0.363064	1.02553	1043.53	19.9862	1097.25	13.1626	1120.97	7.33	2.11648	1043.53	19.9862	Wang et al., 2018d
FJW1428-12	0.0664658	0.00158094	1.52296	0.0376492	0.165665	0.00132474	0.32347	0.597022	820.37	24.4563	939.671	15.1533	988.181	7.32613	4.90907	988.181	7.32613	Wang et al., 2018d
FJW1428-13	0.143865	0.00321532	9.1032	0.218016	0.45789	0.0039282	0.358211	1.58217	2275.93	21.6813	2348.43	21.9142	2430.23	17.3695	6.34935	2275.93	21.6813	Wang et al., 2018d
FJW1428-14	0.0652111	0.00209326	1.47673	0.0511808	0.16402	0.0012686	0.223163	0.365196	781.17	33.33	920.89	20.9856	979.079	7.0256	5.94323	979.079	7.0256	Wang et al., 2018d
FJW1428-15	0.0755444	0.00371117	2.08761	0.10882	0.201157	0.00498023	0.474957	0.310792	1083.34	10.4	1144.74	35.8012	1181.53	26.7282	3.11384	1083.34	10.4	Wang et al., 2018d
FJW1428-16	0.0669403	0.00137812	1.42687	0.082033	0.154433	0.00164996	0.185834	0.53371	835.18	43.2083	900.239	34.3351	925.768	9.21345	2.75755	925.768	9.21345	Wang et al., 2018d
FJW1428-17	0.0918192	0.00445016	3.54101	0.228545	0.273212	0.00322278	0.182762	1.47042	1464.82	30.8658	1536.43	34.0977	1557.08	16.3173	5.92538	1464.82	30.8658	Wang et al., 2018d
FJW1428-18	0.166172	0.00484525	12.3438	0.463579	0.529555	0.00626829	0.315184	0.545643	2520.37	24.77	2630.91	23.5265	2739.58	26.4183	8.00155	2520.37	24.77	Wang et al., 2018d
FJW1428-19	0.105021	0.00330789	4.59929	0.153164	0.316529	0.00306564	0.29083	0.985804	1714.5	19.1375	1749.14	18.5213	1772.76	15.011	1.33221	1714.5	19.1375	Wang et al., 2018d
FJW1428-20	0.0694152	0.00124447	1.42791	0.0322786	0.149186	0.00205419	0.609116	0.311744	910.8	12.96	900.675	12.8048	896.396	11.5231	-0.477381	896.396	11.5231	Wang et al., 2018d
FJW1428-21	0.14583	0.00268555	9.43266	0.184183	0.468028	0.00340133	0.372187	0.982018	2297.84	31.4825	2381.01	17.9279	2474.91	14.936	7.15458	2297.84	31.4825	Wang et al., 2018d
FJW1428-22	0.0358179	0.00251486	0.879112	0.0623301	0.178006	0.002312	0.183189	0.46997	error	error	640.503	33.6926	1056.07	12.652	51%	error	error	Wang et al., 2018d
FJW1428-23	0.0546257	0.00187797	0.592241	0.0210873	0.0782303	0.000762594	0.273776	2.45526	398.2	38.885	472.298	13.4483	485.551	4.55932	2.72944	485.551	4.55932	Wang et al., 2018d
FJW1428-24	0.0725255	0.00227038	1.80484	0.0548762	0.180826	0.00179737	0.326912	0.771488	1011.11	32.41	1047.21	19.8683	1071.48	9.81228	5.63463	1011.11	32.41	Wang et al., 2018d
FJW1428-25	0.135206	0.00354905	7.03283	0.180656	0.375762	0.00399538	0.413926	0.3837	2168.51	23.225	2115.59	22.8395	2056.46	18.7212	-2.87539	2168.51	23.225	Wang et al., 2018d
FJW1428-26	0.0692984	0.00165056	1.56548	0.0373857	0.163146	0.00144176	0.370048	0.719185	909.26	27.3163	956.638	14.7978	974.237	7.99056	1.80643	974.237	7.99056	Wang et al., 2018d
FJW1428-27	0.156422	0.00264028	10.0918	0.176235	0.464931	0.00334376	0.411833	0.721664	2417.59	28.7	2443.22	16.1346	2461.29	14.7142	1.77566	2417.59	28.7	Wang et al., 2018d
FJW1428-28	0.0667629	0.00115093	1.4087	0.024152	0.152178	0.00102951	0.394589	0.122329	831.48	17.5912	892.609	10.1816	913.16	5.7601	2.2505	913.16	5.7601	Wang et al., 2018d
FJW1428-29	0.0864714	0.00108051	2.628	0.0350832	0.218668	0.00134571	0.460992	0.236868	1349.99	24.23	1308.51	9.81917	1274.83	7.11844	-5.89595	1349.99	24.23	Wang et al., 2018d
FJW1428-30	0.0635044	0.00109707	1.18661	0.020043	0.134584	0.000735815	0.323684	0.770832	724.08	18.5162	794.388	9.30749	813.963	4.18071	2.40498	813.963	4.18071	Wang et al., 2018d
FJW1428-31	0.0695495	0.000593641	1.60702	0.0155558	0.166018	0.000720017	0.448039	0.0341855	916.665	16.665	972.946	6.05876	990.134	3.98067	1.73595	990.134	3.98067	Wang et al., 2018d
FJW1428-32	0.141707	0.000863178	8.46864	0.0653984	0.429298	0.00207073	0.624613	0.170118	2250.01	10.03	2282.57	7.0132	2302.55	9.33939	2.28205	2250.01	10.03	Wang et al., 2018d
FJW1428-33	0.0951065	0.0008692	3.88031	0.0376067	0.293319	0.00140034	0.492601	0.853122	1531.49	12.5	1609.6	7.8245	1658.09	6.97987	7.63554	1531.49	12.5	Wang et al., 2018d
FJW1428-34	0.167317	0.00125829	11.2094	0.0905425	0.481623	0.00212944	0.547377	0.426781	2531.17	12.6525	2540.7	7.53004	2534.33	9.26502	0.124707	2531.17	12.6525	Wang et al., 2018d
FJW1428-35	0.0751353	0.00414751	1.70398	0.0894878	0.168079	0.00292555	0.331432	1.50388	1072.22	37.0375	1010.03	22.4108	1001.52	16.1456	-7.0601	1072.22	37.0375	Wang et al., 2018d
FJW1428-36	0.188079	0.0020803	13.9985	0.15673	0.535443	0.00280495	0.467889	0.403344	2725.62	18.2125	2749.61	10.6108	2764.34	11.7763	1.40079	2725.62	18.2125	Wang et al., 2018d
FJW1428-37	0.290482	0.00390458	28.9003	0.385832	0.716355	0.00454905	0.475659	0.618488	3420.06	21.76	3450.14	13.1032	3482.37	17.0857	1.78938	3420.06	21.76	Wang et al., 2018d
FJW1428-38	0.0717705	0.00103687	1.72433	0.035387	0.174357	0.00254132	0.710229	0.772867	988.89	12.495	1017.64	14.473	1036.07	13.9501	4.55377	988.89	12.495	Wang et al., 2018d
FJW1428-39	0.0801602	0.00174027	2.24106	0.0486133	0.201496	0.0015524	0.35517	0.862838	1266.66	19.0575	1193.99	15.231	1183.35	8.32912	-7.04059	1266.66	19.0575	Wang et al., 2018d
FJW1428-40	0.0719184	0.00144701	1.62352	0.0324776	0.162676	0.00131108	0.402884	0.3548	983.335	22.6863	979.355	12.5705	971.631	7.26924	-0.794989	971.631	7.26924	Wang et al., 2018d
FJW1428-41	0.0874244	0.00170137	2.83943	0.0550366	0.23422	0.00175682	0.386973	0.352165	1370.06	18.8275	1366.02	14.5561	1356.58	9.17597	-0.993749	1370.06	18.8275	Wang et al., 2018d
FJW1428-42	0.112347	0.00431064	4.88447	0.187442	0.315903	0.0029375	0.242312	0.378084	1838.89	23.2525	1799.58	21.5698	1769.69	14.3904	-3.91041	1838.89	23.2525	Wang et al., 2018d
FJW1428-43	0.208103	0.00762779	6.71373	0.243245	0.235747	0.00347206	0.4065	2.66994	2891.05	19.5983	2074.43	21.3532	1364.55	18.1124	-52.0228	2891.05	19.5983	Wang et al., 2018d
FJW1428-44	0.193331	0.00539003	14.8803	0.441168	0.556143	0.00316179	0.191758	1.29942	2772.22	22.8375	2807.61	28.2155	2850.67	13.0979	2.75184	2772.22	22.8375	Wang et al., 2018d
FJW1428-45	0.156678	0.00567634	10.0036	0.380104	0.464127	0.00434353	0.246297	0.511147	2420.06	20.575	2435.11	23.3927	2457.75	19.1242	1.53363	2420.06	20.575	Wang et al., 2018d
FJW1428-46	0.071091	0.00311089	1.6418	0.0770663	0.166959	0.00121544	0.155089	0.486463	961.11	44.4462	986.403	29.6291	995.332	6.71425	0.897001	995.332	6.71425	Wang et al., 2018d
FJW1428-47	0.0665337	0.0030739	1.49015	0.0742389	0.16222	0.00115539	0.142963	0.200305	833.33	48.1463	926.379	30.2806	969.104	6.40854	4.40873	969.104	6.40854	Wang et al., 2018d
FJW1428-48	0.154096	0.00811463	10.4677	0.596076	0.491886	0.00361781	0.129161	0.0285127	2391.66	29.835	2477.07	35.2172	2578.83	15.6325	7.25777	2391.66	29.835	Wang et al., 2018d
FJW1428-49	0.0808122	0.00428953	2.58824	0.157934	0.230557	0.00433512	0.308142	0.334235	1216.66	34.7217	1297.32	29.8135	1337.42	22.7101	9.02895	1216.66	34.7217	Wang et al., 2018d
FJW1428-50	0.0583392	0.000935989	0.666046	0.043584	0.0837151	0.00102017	0.186228	1.44629	542.63	35.1806	518.305	26.5686	518.26	6.0684	-0.00880714	518.26	6.0684	Wang et al., 2018d
FJW1428-51	0.101203	0.00399141	3.79405	0.16208	0.271232	0.00168907	0.145774	0.617201	1646.6	24.2275	1591.49	22.8945	1547.05	8.56528	-6.4347	1646.6	24.2275	Wang et al., 2018d
FJW1428-52	0.069616	0.00249011	1.52548	0.0581997	0.158733	0.00119328	0.197043	0.188158	916.665	37.0375	940.682	23.4037	949.729	6.6386	0.952678	949.729	6.6386	Wang et al., 2018d
FJW1428-53	0.0639962	0.000995673	1.06919	0.0205516	0.121537	0.00137186	0.587235	0.279837	742.6	11.11	738.343	8.87848	739.404	7.88525	0.143615	739.404	7.88525	Wang et al., 2018d
FJW1428-54	0.0647584	0.00125944	1.10544	0.0275232	0.123977	0.00192731	0.624377	0.48621	766.36	22.22	755.98	17.654	753.415	11.0538	-0.34038	753.415	11.0538	Wang et al., 2018d
FJW1428-55	0.0702201	0.00157876	1.6675	0.0385833	0.171347	0.00128151	0.32323	0.33117	1000	16.9758	996.235	9.79184	1019.53	7.05269	1.91531	1000	16.9758	Wang et al., 2018d
FJW1428-56	0.157517	0.00294902	10.0752	0.190784	0.460981	0.00361374	0.413987	0.496743	2429.32	31.3225	2441.7	17.4929	2443.89	15.9453	0.596088	2429.32	31.3225	Wang et al., 2018d
FJW1428-57	0.164826	0.00304164	10.617	0.192181	0.464301	0.00375989	0.447367	1.21061	2505.86	30.4	2490.19	16.7992	2458.52	16.5525	-1.92545	2505.86	30.4	Wang et al., 2018d
FJW1428-58	0.0718298	0.00127074	1.60835	0.0287852	0.161158	0.00113071	0.392022	0.173063	981.17	17.5938	973.464	11.206	963.206	6.27738	-1.06499	963.206	6.27738	Wang et al., 2018d
FJW1428-59	0.0608598	0.00130732	0.911941	0.0196356	0.107868	0.000756123	0.325554	0.277788	635.2	23.1438	658.089	10.4283	660.354	4.3997	0.342975	660.354	4.3997	Wang et al., 2018d
FJW1428-60	0.0713261	0.0019467	1.73709	0.0498198	0.175073	0.00151605	0.301936	0.858458	968.515	28.0087	1022.39	18.4838	1040	8.31701	6.87378	968.515	28.0087	Wang et al., 2018d
																		Wang et al., 2018d
Huanglian Fm, late Ediacaran, N 25°46'33.3", E 116°16'58.3"																		Wang et al., 2018d
FJW1430-01	0.0729827	0.001101	1.73406	0.0334211	0.171885	0.00206174	0.622359	0.965385	1012.96	15.186	1021.26	13.4799	1022.49	11.3414	0.931737	1012.96	15.186	Wang et al., 2018d
FJW1430-02	0.074913	0.00135198	1.91703	0.0405762	0.185485	0.00205125	0.522479	0.525251	1066.36	12.03	1087.04	11.51	1096.87	11.1543	2.78161	1066.36	12.03	Wang et al., 2018d
FJW1430-03	0.0701919	0.00100926	1.55453	0.0301374	0.160565	0.00208798	0.670767	0.451265	1000	14.3475	952.297	12.6339	959.914	11.5978	0.793483	959.914	11.5978	Wang et al., 2018d
FJW1430-04	0.0739231	0.00106094	1.56794	0.0301301	0.15364	0.00196331	0.664984	0.319397	1038.89	14.816	957.61	11.7485	921.336	10.9708	-3.93714	921.336	10.9708	Wang et al., 2018d
FJW1430-05	0.0619731	0.000861437	0.871915	0.0159206	0.102277	0.00121098	0.648443	0.508639	672.235	13.8863	636.606	12.5388	627.742	7.08214	-1.41215	627.742	7.08214	Wang et al., 2018d
FJW1430-06	0.0742824	0.00149763	1.97653	0.0462938	0.192904	0.00229951	0.508949	0.495975	1050.01	12.03	1107.54	13.4104	1137.09	12.4265	7.65852	1050.01	12.03	Wang et al., 2018d
FJW1430-07	0.072875	0.00150183	1.64696	0.039843	0.163855	0.00207615	0.523757	0.398436	1010.18	13.275	988.385	13.4282	978.166	11.4995	-1.04472	978.166	11.4995	Wang et al., 2018d
FJW1430-08	0.0712594	0.00174558	1.57882	0.0473477	0.160918	0.00278392	0.576881	0.329299	964.81	16.68	961.904	20.4998	961.874	15.4588	-0.305242	961.874	15.4588	Wang et al., 2018d
FJW1430-09	0.0882586	0.00172187	2.91324	0.0650508	0.23951	0.00260158	0.486449	0.508523	1387.96	12.03	1385.35	10.9504	1384.15	13.5303	-0.27571	1387.96	12.03	Wang et al., 2018d
FJW1430-10	0.0766344	0.00130787	2.03362	0.0437006	0.192549	0.00251437	0.607671	0.770888	1122.22	11.11	1126.83	12.8205	1135.17	13.5916	1.14043	1122.22	11.11	Wang et al., 2018d
FJW1430-11	0.0887173	0.00160987	2.56284	0.0513325	0.20945	0.00177606	0.423356	0.390897	1398.15	15.74	1290.1	12.2891	1225.89	9.46646	-14.052	1398.15	15.74	Wang et al., 2018d
FJW1430-12	0.076541	0.00135467	2.13474	0.0465868	0.2021	0.00258032	0.585045	0.46014	1109.26	16.665	1160.12	12.4365	1186.59	13.8373	6.51706	1109.26	16.665	Wang et al., 2018d
FJW1430-13	0.0960016	0.00189789	3.71128	0.0846634	0.280464	0.00319263	0.498998	0.686908	1547.84	13.89	1573.8	13.4653	1593.7	16.0731	2.87748	1547.84	13.89	Wang et al., 2018d
FJW1430-14	0.0963088	0.00218416	3.62044	0.0887472	0.272654	0.00253667	0.379542	0.749522	1553.71	12.27	1554.03	10.9223	1554.26	12.8491	0.0351964	1553.71	12.27	Wang et al., 2018d
FJW1430-15	0.0737228	0.0010986	1.88217	0.034648	0.185099	0.00200054	0.587115	0.470311	1035.19	14.8175	1074.83	11.0029	1094.77	10.8821	5.44251	1035.19	14.8175	Wang et al., 2018d
FJW1430-16	0.0706966	0.00154858	1.6949	0.0422577	0.173973	0.0020717	0.47762	0.245181	949.995	11.115	1006.61	8.95398	1033.96	11.3759	8.12102	949.995	11.115	Wang et al., 2018d
FJW1430-17	0.188354	0.00332457	14.3424	0.282963	0.551594	0.00486203	0.446776	0.433889	2728.09	27.8	2772.62	13.904	2831.8	20.2004	3.66225	2728.09	27.8	Wang et al., 2018d
FJW1430-18	0.0830337	0.00155061	2.53397	0.0539267	0.221786	0.00226358	0.479579	0.942798	1270.05	11.115	1281.84	12.4745	1291.3	11.9431	1.64583	1270.05	11.115	Wang et al., 2018d
FJW1430-19	0.0750035	0.00114847	1.94609	0.0386487	0.188424	0.00238296	0.636808	0.401547	1133.34	13.425	1097.1	12.4227	1112.83	12.926	-1.84218	1133.34	13.425	Wang et al., 2018d
FJW1430-20	0.0716703	0.00145618	1.68689	0.0398197	0.170863	0.00205323	0.509071	0.539709	975.93	13.4175	1003.59	9.05399	1016.86	11.3045	4.02539	975.93	13.4175	Wang et al., 2018d
FJW1430-21	0.0698174	0.00142918	1.56152	0.0363951	0.16217	0.00180733	0.478158	0.292481	924.07	11.1075	955.071	10.65	968.827	10.0251	4.61968	968.827	10.0251	Wang et al., 2018d
FJW1430-22	0.069248	0.00120152	1.15135	0.023784	0.120604	0.00135205	0.542688	0.872414	905.555	11.8825	777.88	11.6402	734.042	7.77782	-5.97212	734.042	7.77782	Wang et al., 2018d
FJW1430-23	0.113384	0.00182965	5.90096	0.121327	0.3746	0.00477294	0.619702	0.713264	1854.63	14.2	1961.38	16.4679	2051.01	22.3836	4.37015	1854.63	14.2	Wang et al., 2018d
FJW1430-24	0.106832	0.0020532	4.63084	0.100888	0.312855	0.0032099	0.470943	0.550831	1746.29	15.74	1754.84	20.82	1754.74	15.7614	0.481655	1746.29	15.74	Wang et al., 2018d
FJW1430-25	0.0716061	0.0014241	1.75012	0.0402473	0.177339	0.00204767	0.502094	0.592048	975.93	12.4987	1027.21	9.27515	1052.42	11.2118	2.39615	975.93	12.4987	Wang et al., 2018d
FJW1430-26	0.078293	0.0015998	2.05124	0.0495201	0.189964	0.00244223	0.532539	1.24731	1153.71	14.04	1132.71	13.2759	1121.18	13.2304	-2.90164	1153.71	14.04	Wang et al., 2018d
FJW1430-27	0.0754356	0.00138946	1.89763	0.0427301	0.182599	0.00236519	0.575236	0.623165	1079.63	12.495	1080.26	10.1962	1081.16	12.8928	0.141401	1079.63	12.495	Wang et al., 2018d
FJW1430-28	0.061336	0.00165256	0.91997	0.0267983	0.108823	0.00120507	0.38015	0.358758	650.015	9.25	662.344	13.4453	665.911	7.00596	0.535673	665.911	7.00596	Wang et al., 2018d
FJW1430-29	0.071	0.0013668	1.59382	0.0392807	0.163034	0.00250888	0.6244	0.61357	966.665	12.2662	967.795	12.8705	973.616	13.9061	0.597838	973.616	13.9061	Wang et al., 2018d
FJW1430-30	0.0612936	0.000962729	0.861624	0.0173892	0.101969	0.00129223	0.627934	0.618134	650.015	11.11	631.009	10.5108	625.935	7.55945	-0.810615	625.935	7.55945	Wang et al., 2018d
FJW1430-31	0.0837072	0.00127172	2.75295	0.0482816	0.238482	0.00208961	0.499606	1.05276	1287.04	14.5838	1342.89	9.56878	1378.8	10.8766	6.65505	1287.04	14.5838	Wang et al., 2018d
FJW1430-32	0.058271	0.00134413	0.740317	0.0166682	0.0916448	0.000685049	0.332004	0.272652	538.925	51.845	562.591	9.72529	565.257	4.04537	0.47176	565.257	4.04537	Wang et al., 2018d
FJW1430-33	0.0698358	0.00137193	1.57392	0.0349501	0.16344	0.00169198	0.466197	0.737602	924.07	11.1075	959.973	12.8562	975.866	9.49994	5.30774	975.866	9.49994	Wang et al., 2018d
FJW1430-34	0.0734497	0.00159648	1.81914	0.044224	0.179996	0.00195985	0.447888	0.621489	1027.78	11.115	1052.38	10.1686	1066.95	10.7068	1.36597	1027.78	11.115	Wang et al., 2018d
FJW1430-35	0.0821338	0.00169035	2.68198	0.0627881	0.236804	0.00264253	0.47666	0.984598	1249.99	9.25	1323.5	14.0209	1370.06	13.7733	8.76356	1249.99	9.25	Wang et al., 2018d
FJW1430-36	0.0761254	0.00140413	1.76898	0.0359206	0.168513	0.00143093	0.41818	0.678303	1098.15	11.88	1034.15	11.9487	1003.91	7.89408	-9.38675	1098.15	11.88	Wang et al., 2018d
FJW1430-37	0.0694538	0.00135468	1.45415	0.0308483	0.151777	0.0012662	0.393254	0.347456	922.22	11.1113	911.59	9.74948	910.916	7.08681	-1.24096	910.916	7.08681	Wang et al., 2018d
FJW1430-38	0.0698685	0.00121207	1.62262	0.0344407	0.168415	0.00205966	0.576183	0.650947	924.07	11.1075	979.007	9.59239	1003.37	11.3636	2.42816	924.07	11.1075	Wang et al., 2018d
FJW1430-39	0.0615497	0.00135046	0.931584	0.0232783	0.109777	0.00131266	0.478536	0.608369	657.42	11.1075	668.468	9.59624	671.45	7.62493	0.444213	671.45	7.62493	Wang et al., 2018d
FJW1430-40	0.139982	0.00383139	7.18869	0.215547	0.372285	0.00455807	0.408332	0.364064	2227.78	15.45	2135.1	11.5403	2040.14	21.4119	-9.19692	2227.78	15.45	Wang et al., 2018d
FJW1430-41	0.0743461	0.00141242	1.75452	0.0385686	0.171041	0.00189157	0.503092	0.293479	1050.93	13.8863	1028.83	11.9371	1017.84	10.4128	-3.25053	1050.93	13.8863	Wang et al., 2018d
FJW1430-42	0.0720719	0.00162074	1.45161	0.036554	0.145675	0.00165077	0.450006	0.612076	987.04	11.5725	910.541	13.2149	876.673	9.41232	-3.8632	876.673	9.41232	Wang et al., 2018d
FJW1430-43	0.073248	0.00169878	1.67484	0.0422762	0.165905	0.0016531	0.394744	0.297552	1020.37	12.5025	999.023	11.6656	989.51	9.14016	-0.961472	989.51	9.14016	Wang et al., 2018d
FJW1430-44	0.189578	0.00536917	13.0628	0.386263	0.499605	0.00424669	0.287459	0.42664	2738.59	15.4	2684.2	11.5458	2612.1	18.2555	-4.84255	2738.59	15.4	Wang et al., 2018d
FJW1430-45	0.0842455	0.00127487	2.59083	0.0460814	0.222915	0.00208343	0.525474	0.539006	1298.15	13.4175	1298.05	12.6505	1297.26	10.9825	-0.0685565	1298.15	13.4175	Wang et al., 2018d
FJW1430-46	0.0842887	0.00177421	2.77751	0.0661039	0.238947	0.00265389	0.46667	0.752632	1299.08	11.1	1349.51	12.6462	1381.22	13.8086	2.29584	1299.08	11.1	Wang et al., 2018d
FJW1430-47	0.084373	0.00172092	2.60949	0.0619295	0.224235	0.00272061	0.511235	0.691468	1301.85	11.1075	1303.31	12.2859	1304.21	14.3258	0.181292	1301.85	11.1075	Wang et al., 2018d
FJW1430-48	0.0772814	0.00131758	2.05406	0.0416601	0.192836	0.0021184	0.541642	0.630497	1127.79	17.61	1133.65	12.0637	1136.72	11.4484	0.270249	1127.79	17.61	Wang et al., 2018d
FJW1430-49	0.0777224	0.00124471	2.20495	0.042142	0.205199	0.00214051	0.545788	0.464984	1139.82	15.5063	1182.61	11.03	1203.19	11.4492	5.26695	1139.82	15.5063	Wang et al., 2018d
FJW1430-50	0.0837372	0.00134282	2.63888	0.0502139	0.228511	0.00234073	0.53832	0.395187	1287.04	12.2662	1311.55	12.8812	1326.69	12.2826	2.98849	1287.04	12.2662	Wang et al., 2018d
FJW1430-51	0.0757847	0.00148696	1.87165	0.0427291	0.179482	0.00209476	0.511228	0.270868	1100	12.655	1071.11	11.4189	1064.14	11.4488	-3.36957	1100	12.655	Wang et al., 2018d
FJW1430-52	0.118464	0.00271903	6.24556	0.153076	0.382136	0.00328526	0.350765	0.448506	1933.03	16.04	2010.85	11.8682	2086.25	15.3228	7.34439	1933.03	16.04	Wang et al., 2018d
FJW1430-53	0.10773	0.00248165	4.61251	0.110953	0.310454	0.00215076	0.287998	0.660868	1761.42	9.3	1751.53	12.2183	1742.94	10.58	-1.06018	1761.42	9.3	Wang et al., 2018d
FJW1430-54	0.0808387	0.00127032	2.41706	0.0469834	0.216324	0.00247507	0.588608	0.10317	1217.59	16.8225	1247.68	16.1449	1262.42	13.1177	3.55137	1217.59	16.8225	Wang et al., 2018d
FJW1430-55	0.0746574	0.00120413	1.7053	0.0322118	0.165895	0.00163108	0.520507	0.475153	1061.12	16.481	1010.52	11.662	989.457	9.01852	-7.2422	989.457	9.01852	Wang et al., 2018d
FJW1430-56	0.0818238	0.00160627	2.3752	0.0533078	0.210774	0.00229287	0.4847	0.945956	1242.59	12.65	1235.17	12.3972	1232.94	12.2077	-0.180736	1242.59	12.65	Wang et al., 2018d
FJW1430-57	0.073263	0.0013774	1.81796	0.0404256	0.180086	0.00213845	0.534006	0.359571	1020.37	13.4175	1051.95	12.3699	1067.45	11.6816	4.41021	1020.37	13.4175	Wang et al., 2018d
FJW1430-58	0.0716576	0.00148407	1.7147	0.0417759	0.173653	0.00222822	0.526672	0.725486	975.93	11.115	1014.04	14.0886	1032.2	12.2388	5.45192	975.93	11.115	Wang et al., 2018d
FJW1430-59	0.0778236	0.00118626	1.94403	0.0372069	0.180921	0.00209397	0.604728	0.302661	1142.6	14.816	1096.39	16.7199	1072	11.4306	-6.58543	1142.6	14.816	Wang et al., 2018d
FJW1430-60	0.0755479	0.0013315	1.88972	0.0391301	0.181392	0.00197164	0.524922	0.671441	1083.34	11.115	1077.48	9.59129	1074.58	10.7585	-0.815021	1083.34	11.115	Wang et al., 2018d
FJW1430-61	0.0919646	0.0013502	3.34349	0.0608285	0.26403	0.00283675	0.590556	0.742809	1466.36	15.2775	1491.27	12.4459	1510.43	14.4671	2.91762	1466.36	15.2775	Wang et al., 2018d
FJW1430-62	0.0834378	0.00163822	2.74166	0.0631714	0.23837	0.00287438	0.52334	0.797605	1279.63	11.115	1339.83	14.8396	1378.22	14.9628	7.1534	1279.63	11.115	Wang et al., 2018d
FJW1430-63	0.0706027	0.00134964	1.71778	0.0410627	0.176532	0.00253373	0.600423	0.421607	946.29	11.1075	1015.2	11.4455	1048	13.8828	9.7053	946.29	11.1075	Wang et al., 2018d
FJW1430-64	0.0948815	0.00200623	3.71301	0.0856106	0.283725	0.00260854	0.398748	0.734972	1525.62	15.2925	1574.18	11.5954	1610.1	13.0992	5.24662	1525.62	15.2925	Wang et al., 2018d
FJW1430-65	0.0931406	0.0016274	3.34203	0.0663381	0.260291	0.0024517	0.47452	0.938443	1500	13.425	1490.93	11.5801	1491.33	12.5405	-0.581195	1500	13.425	Wang et al., 2018d
FJW1430-66	0.0945342	0.0021624	3.47804	0.0865853	0.266885	0.00262204	0.394644	0.777226	1520.37	16.68	1522.25	12.7215	1524.97	13.342	0.301731	1520.37	16.68	Wang et al., 2018d
FJW1430-67	0.0781166	0.00162333	2.34545	0.0599181	0.217633	0.00323375	0.581635	0.743556	1150.01	12.5025	1226.18	16.299	1269.36	17.1202	3.40158	1150.01	12.5025	Wang et al., 2018d
FJW1430-68	0.0754844	0.00106567	1.89322	0.0356827	0.181992	0.0022725	0.662515	0.569582	1081.17	12.65	1078.71	14.6151	1077.85	12.3939	-0.3082	1081.17	12.65	Wang et al., 2018d
FJW1430-69	0.0820617	0.00156159	2.29927	0.0488136	0.202988	0.0019106	0.443352	0.538234	1247.21	16.665	1212.06	11.3246	1191.35	10.2383	-4.689	1247.21	16.665	Wang et al., 2018d
FJW1430-70	0.071804	0.00148181	1.68898	0.042213	0.170786	0.00240786	0.564104	0.73709	988.89	11.11	1004.38	12.7074	1016.44	13.2578	2.71032	988.89	11.11	Wang et al., 2018d
FJW1430-71	0.0812489	0.00116049	2.1709	0.0493966	0.190558	0.00337529	0.77844	0.484318	1227.78	14.815	1171.77	17.728	1124.4	18.276	-9.19385	1227.78	14.815	Wang et al., 2018d
FJW1430-72	0.0809879	0.00139923	2.42563	0.0475608	0.217214	0.00201389	0.472852	1.13028	1221.3	11.1075	1250.23	13.5748	1267.13	10.6657	3.6176	1221.3	11.1075	Wang et al., 2018d
FJW1430-73	0.0816727	0.00149711	2.41316	0.0505291	0.214374	0.00216961	0.483342	1.25087	1238.88	12.035	1246.52	11.1989	1252.08	11.5172	1.05376	1238.88	12.035	Wang et al., 2018d
FJW1430-74	0.0772615	0.00151244	2.18784	0.0476119	0.205022	0.00194916	0.436866	0.558779	1127.79	12.27	1177.18	12.2556	1202.24	10.4273	6.19301	1127.79	12.27	Wang et al., 2018d
FJW1430-75	0.0765047	0.00137414	1.98086	0.0427272	0.187855	0.00224368	0.553716	0.568576	1109.26	12.65	1109.01	12.2596	1109.75	12.1763	0.0438384	1109.26	12.65	Wang et al., 2018d
FJW1430-76	0.0733386	0.00130002	1.69234	0.0384167	0.167188	0.00237082	0.624682	0.635385	1033.34	17.78	1005.65	17.6222	996.601	13.0941	-0.907517	996.601	13.0941	Wang et al., 2018d
FJW1430-77	0.0579371	0.00166091	0.826188	0.0259772	0.102975	0.000876872	0.270826	0.56328	527.815	62.955	611.495	14.4446	631.822	5.12494	3.21725	631.822	5.12494	Wang et al., 2018d
FJW1430-78	0.0738464	0.00146004	1.74468	0.0430229	0.17158	0.00252861	0.597627	0.492833	1038.89	12.655	1025.2	12.2059	1020.81	13.9132	-0.429554	1038.89	12.655	Wang et al., 2018d
FJW1430-79	0.0723458	0.00103962	1.74972	0.0300635	0.175402	0.00165209	0.548189	0.187314	995.99	13.59	1027.06	10.6861	1041.8	9.06081	4.3976	995.99	13.59	Wang et al., 2018d
FJW1430-80	0.0723458	0.00129953	1.74972	0.0399867	0.175402	0.00247814	0.618223	0.187314	1009.26	11.1075	1028.74	13.0552	1037.87	12.2062	2.75672	1009.26	11.1075	Wang et al., 2018d
																		Wang et al., 2018d
Nanyan Fm, early Ediacaran, N 25°45'31.3",E 116°14'25.4"																		Wang et al., 2018d
FJW1453-01	0.0637193	0.00135833	1.03114	0.0255023	0.11747	0.00147306	0.507028	1.58244	731.49	11.11	719.498	10.6487	715.986	8.49774	-0.490473	715.986	8.49774	Wang et al., 2018d
FJW1453-02	0.0758265	0.0012933	1.95058	0.0423237	0.186542	0.00250201	0.618146	0.706991	1100	11.1075	1098.64	12.0991	1102.61	13.5933	0.237095	1100	11.1075	Wang et al., 2018d
FJW1453-03	0.0735463	0.00203893	1.74644	0.0517994	0.172084	0.0018142	0.355448	0.494019	1029.32	9.275	1025.85	12.4807	1023.58	9.97805	-0.560694	1029.32	9.275	Wang et al., 2018d
FJW1453-04	0.0848881	0.00154043	2.3683	0.0791	0.20328	0.00569993	0.839526	0.85339	1322.22	23.702	1233.09	23.7611	1192.92	30.5368	-10.8393	1322.22	23.702	Wang et al., 2018d
FJW1453-05	0.0634711	0.00118417	1.07626	0.0268202	0.12226	0.00201976	0.662937	0.571147	724.08	14.0425	741.808	12.3677	743.557	11.6018	0.235172	743.557	11.6018	Wang et al., 2018d
FJW1453-06	0.0758553	0.00124516	1.92911	0.0383855	0.184649	0.00207663	0.565199	0.75505	1100	11.11	1091.23	9.83135	1092.32	11.3003	-0.702904	1100	11.11	Wang et al., 2018d
FJW1453-07	0.0812094	0.00118218	2.40403	0.0553068	0.213284	0.00379955	0.774348	0.116597	1227.78	14.81	1243.8	17.54	1246.29	20.1878	1.48559	1227.78	14.81	Wang et al., 2018d
FJW1453-08	0.124835	0.00225524	6.35463	0.141161	0.369003	0.00476982	0.581897	0.500628	2027.78	21.6	2026.02	17.2016	2024.71	22.4604	-0.151534	2027.78	21.6	Wang et al., 2018d
FJW1453-09	0.0988769	0.00140877	3.82349	0.070829	0.280398	0.00331969	0.639105	0.73861	1602.78	19.7067	1597.7	14.3582	1593.36	16.7137	-0.590589	1602.78	19.7067	Wang et al., 2018d
FJW1453-10	0.0882393	0.00140689	2.69819	0.0533775	0.221378	0.00259251	0.59197	0.598731	1387.96	15.275	1327.96	17.1798	1289.15	13.6832	-7.66481	1387.96	15.275	Wang et al., 2018d
FJW1453-11	0.0979974	0.00155616	2.16008	0.0410965	0.159291	0.00166919	0.55078	0.700096	1587.04	16.665	1168.3	16.6217	952.837	9.28179	-22.6124	952.837	9.28179	Wang et al., 2018d
FJW1453-12	0.0645452	0.00142491	1.12921	0.0271319	0.126893	0.00120348	0.394725	0.582477	761.115	11.11	767.378	11.2846	770.118	6.88451	0.355737	770.118	6.88451	Wang et al., 2018d
FJW1453-13	0.0639552	0.00183293	1.29948	0.0398469	0.139044	0.00151614	0.355598	0.0769878	738.895	12.221	845.49	11.1474	839.255	8.58107	-0.742969	839.255	8.58107	Wang et al., 2018d
FJW1453-14	0.0700118	0.000714746	1.53681	0.0251804	0.159449	0.00204345	0.782165	0.506035	927.775	15.186	945.226	11.0295	953.716	11.3614	0.890152	953.716	11.3614	Wang et al., 2018d
FJW1453-15	0.0709262	0.000986807	1.55557	0.0271249	0.158798	0.00166913	0.602791	0.373104	955.24	13.89	952.709	11.4742	950.093	9.28539	-0.275407	950.093	9.28539	Wang et al., 2018d
FJW1453-16	0.0835252	0.0014307	2.66743	0.0542046	0.231809	0.00253442	0.538028	0.892796	1283.34	11.115	1319.48	11.7335	1343.97	13.2634	4.51179	1283.34	11.115	Wang et al., 2018d
FJW1453-17	0.0729307	0.00118515	1.8229	0.0371444	0.181647	0.00223307	0.603316	1.0614	1012.96	15.2775	1053.73	11.3889	1075.96	12.1824	5.85566	1012.96	15.2775	Wang et al., 2018d
FJW1453-18	0.0680488	0.00117339	1.36154	0.0319172	0.145526	0.00231107	0.677447	0.905539	870.05	13.8938	872.531	9.83936	875.837	13.0055	0.377473	875.837	13.0055	Wang et al., 2018d
FJW1453-19	0.0817522	0.00150444	2.38497	0.0492056	0.212516	0.00198233	0.452121	0.33832	1239.81	11.5725	1238.1	12.713	1242.21	10.5392	0.192877	1239.81	11.5725	Wang et al., 2018d
FJW1453-20	0.0751312	0.00124708	1.87593	0.0386176	0.181252	0.00220699	0.59149	1.52178	1072.22	11.11	1072.62	13.1586	1073.81	12.0442	0.147709	1072.22	11.11	Wang et al., 2018d
FJW1453-21	0.0744896	0.00127533	1.731	0.0336721	0.16853	0.00155622	0.4747	0.892919	1054.63	10.65	1020.12	9.85383	1004.01	8.58516	-5.04243	1054.63	10.65	Wang et al., 2018d
FJW1453-22	0.0776162	0.00134971	1.8754	0.0424341	0.1753	0.00253773	0.639797	1.72733	1138.89	16.67	1072.44	11.2152	1041.25	13.9192	-9.37792	1138.89	16.67	Wang et al., 2018d
FJW1453-23	0.072561	0.00134066	1.70339	0.0381603	0.170587	0.00216115	0.565511	0.154895	1011.11	11.1075	1009.8	11.4324	1015.35	11.9015	0.417268	1011.11	11.1075	Wang et al., 2018d
FJW1453-24	0.067952	0.0009962	1.17128	0.0214101	0.12529	0.00136793	0.597297	0.718646	877.775	15.0525	787.242	9.93573	760.939	7.83644	-3.45665	760.939	7.83644	Wang et al., 2018d
FJW1453-25	0.0775003	0.00125131	2.04433	0.0386186	0.191308	0.00187606	0.519119	0.484152	1144.45	16.5125	1130.41	12.0393	1128.46	10.1517	-1.41727	1144.45	16.5125	Wang et al., 2018d
FJW1453-26	0.0848074	0.00138163	1.41387	0.0320847	0.119731	0.00189141	0.696134	0.525793	1322.22	21.85	894.789	15.4785	729.014	10.8891	-22.7397	729.014	10.8891	Wang et al., 2018d
FJW1453-27	0.0780885	0.00114382	2.16786	0.0471819	0.196583	0.00316449	0.739629	0.320305	1150.01	14.812	1170.79	17.6312	1156.94	17.0484	0.59917	1150.01	14.812	Wang et al., 2018d
FJW1453-28	0.0710803	0.00132198	1.58576	0.0396441	0.16176	0.00270243	0.668254	0.255134	961.11	12.7312	964.633	16.107	966.552	14.9953	0.198479	966.552	14.9953	Wang et al., 2018d
FJW1453-29	0.164597	0.00242047	11.2537	0.218021	0.494896	0.00624189	0.651025	0.810118	2503.39	20.05	2544.37	14.8235	2591.82	26.9169	3.412	2503.39	20.05	Wang et al., 2018d
FJW1453-30	0.073206	0.00118766	1.89288	0.0386742	0.187946	0.00233417	0.607854	0.64776	1020.37	11.11	1078.59	11.4788	1110.24	12.6664	8.09466	1020.37	11.11	Wang et al., 2018d
FJW1453-31	0.0716137	0.00125066	1.47987	0.0363415	0.149854	0.00258719	0.70304	0.99567	975.93	12.655	922.176	15.8745	900.145	14.5045	-2.44748	900.145	14.5045	Wang et al., 2018d
FJW1453-32	0.158866	0.00218143	10.3086	0.18467	0.470229	0.00541006	0.642238	0.363788	2443.51	27	2462.87	16.8889	2484.56	23.7212	1.65214	2443.51	27	Wang et al., 2018d
FJW1453-33	0.0753617	0.00100924	1.88875	0.0372152	0.18226	0.0026342	0.733519	0.413223	1079.63	12.655	1077.14	13.7585	1079.31	14.3633	-0.0298504	1079.63	12.655	Wang et al., 2018d
FJW1453-34	0.156956	0.00253856	10.2413	0.186664	0.473703	0.00398078	0.46106	0.641257	2433.33	24.65	2456.82	14.0637	2499.78	17.4131	2.65829	2433.33	24.65	Wang et al., 2018d
FJW1453-35	0.0799164	0.00123185	2.19853	0.0424423	0.199349	0.00231688	0.602037	0.943905	1194.44	15.5062	1180.58	14.0192	1171.82	12.4531	-1.93045	1194.44	15.5062	Wang et al., 2018d
FJW1453-36	0.0749588	0.00113508	1.8444	0.0359711	0.179435	0.00220538	0.630197	0.401858	1133.34	14.815	1061.43	13.2181	1063.89	12.0539	-6.52768	1133.34	14.815	Wang et al., 2018d
FJW1453-37	0.0757319	0.00106109	2.0723	0.0561865	0.198449	0.00460644	0.856128	0.52323	1087.96	13.89	1139.69	16.2018	1166.98	24.778	6.77091	1087.96	13.89	Wang et al., 2018d
FJW1453-38	0.0810316	0.00128301	2.37539	0.0519887	0.211013	0.00318841	0.690385	0.500988	1221.91	15.554	1235.22	19.1722	1234.21	16.9725	0.996696	1221.91	15.554	Wang et al., 2018d
FJW1453-39	0.0634877	0.00108085	1.05476	0.0216283	0.120582	0.00137822	0.557399	0.359848	724.08	13.8875	731.237	11.1521	733.91	7.92851	0.364235	733.91	7.92851	Wang et al., 2018d
FJW1453-40	0.0805801	0.00115203	2.2898	0.0401796	0.206344	0.00209931	0.579797	0.37364	1212.96	12.655	1209.15	10.1108	1209.31	11.2182	-0.301613	1212.96	12.655	Wang et al., 2018d
FJW1453-41	0.0800473	0.00107387	2.25272	0.0391812	0.204009	0.00225831	0.636449	0.39193	1198.15	12.495	1197.64	13.1213	1196.82	12.0913	-0.111014	1198.15	12.495	Wang et al., 2018d
FJW1453-42	0.0947518	0.0017421	2.45053	0.055706	0.181112	0.00242117	0.58808	0.514474	1524.08	23.024	1257.58	17.562	1073.04	13.2146	-42.0328	1524.08	23.024	Wang et al., 2018d
FJW1453-43	0.0693568	0.00129134	1.27871	0.0284579	0.13359	0.00162865	0.547802	0.655809	909.26	11.88	836.281	13.6075	808.314	9.26168	-3.45995	808.314	9.26168	Wang et al., 2018d
FJW1453-44	0.1392	0.00207316	3.12902	0.0662369	0.157021	0.00236209	0.710637	0.581746	2217.59	25.803	1439.85	20.3278	940.198	13.1605	-53.1437	940.198	13.1605	Wang et al., 2018d
FJW1453-45	0.0721876	0.00140901	1.63953	0.0361087	0.164624	0.00167936	0.463191	0.337756	990.74	14.97	985.533	11.1486	982.424	9.29559	-0.316523	982.424	9.29559	Wang et al., 2018d
FJW1453-46	0.0754504	0.00143854	1.89152	0.0447321	0.182184	0.00254893	0.591615	0.29084	1080.56	13.425	1078.12	13.9265	1078.9	13.8992	-0.153829	1080.56	13.425	Wang et al., 2018d
FJW1453-47	0.0710347	0.0013284	1.67796	0.0385726	0.171179	0.00228844	0.581557	0.170915	966.665	13.425	1000.21	14.0581	1018.6	12.5961	5.09894	966.665	13.425	Wang et al., 2018d
FJW1453-48	0.0722879	0.00109805	1.67015	0.0339768	0.167665	0.00226889	0.66519	0.460573	994.445	12.5025	997.243	14.3638	999.231	12.526	0.19888	999.231	12.526	Wang et al., 2018d
FJW1453-49	0.0793781	0.00114409	2.20522	0.043823	0.201233	0.0027531	0.68845	1.55348	1183.34	12.65	1182.7	11.018	1181.94	14.7745	-0.11785	1183.34	12.65	Wang et al., 2018d
FJW1453-50	0.0832336	0.00129347	2.24792	0.0421717	0.195929	0.00205914	0.560205	0.428885	1275.92	15.2925	1196.14	12.543	1153.41	11.0994	-10.6219	1275.92	15.2925	Wang et al., 2018d
FJW1453-51	0.0731122	0.00136625	1.72317	0.0403121	0.170961	0.00240613	0.60161	1.64773	1016.66	12.2625	1017.21	12.9349	1017.4	13.2463	0.0725726	1016.66	12.2625	Wang et al., 2018d
FJW1453-52	0.0706499	0.00120494	1.38697	0.0282027	0.14249	0.00157771	0.544525	0.253141	946.29	13.89	883.407	8.98449	858.73	8.90212	-2.87369	858.73	8.90212	Wang et al., 2018d
FJW1453-53	0.151945	0.00234283	9.35341	0.178323	0.446907	0.00501116	0.588145	0.749225	2368.21	26.225	2373.27	20.5367	2381.49	22.3264	0.557497	2368.21	26.225	Wang et al., 2018d
FJW1453-54	0.0747442	0.00110827	1.83024	0.0342078	0.178157	0.00202718	0.608797	0.746601	1061.12	15.5062	1056.36	12.7082	1056.9	11.092	-0.399047	1061.12	15.5062	Wang et al., 2018d
FJW1453-55	0.0741406	0.00147597	1.88426	0.0430696	0.184682	0.0020743	0.491378	0.408743	1055.56	11.1113	1075.56	13.9445	1092.5	11.2872	3.38129	1055.56	11.1113	Wang et al., 2018d
FJW1453-56	0.0726124	0.00126208	1.56558	0.034264	0.156286	0.00207859	0.607696	0.36577	1003.39	17.53	956.68	12.8583	936.105	11.5884	-2.1979	936.105	11.5884	Wang et al., 2018d
FJW1453-57	0.0810428	0.00141609	2.46743	0.0508309	0.220948	0.00241099	0.529691	0.455915	1233.33	11.11	1262.54	11.9783	1286.88	12.7297	4.16124	1233.33	11.11	Wang et al., 2018d
FJW1453-58	0.0906826	0.00143857	2.45867	0.0604788	0.190837	0.00358759	0.764252	0.836933	1439.82	20.128	1259.97	23.7169	1125.91	19.4209	-27.8801	1439.82	20.128	Wang et al., 2018d
FJW1453-59	0.0751418	0.00106857	1.82073	0.0327121	0.176383	0.00193674	0.611155	1.03868	1072.22	18.516	1052.95	14.9358	1047.18	10.6131	-2.39129	1072.22	18.516	Wang et al., 2018d
FJW1453-60	0.0703313	0.00100038	1.52748	0.0310702	0.157566	0.00229113	0.714856	0.483933	938.885	15.0412	941.486	12.37	943.237	12.7592	0.185559	943.237	12.7592	Wang et al., 2018d
FJW1453-61	0.0702377	0.00119964	1.74161	0.0353665	0.17988	0.00197583	0.540909	0.161612	1000	11.1075	1024.06	13.8689	1066.32	10.7952	6.2193	1000	11.1075	Wang et al., 2018d
FJW1453-62	0.153622	0.00221354	9.4586	0.196577	0.44368	0.006645	0.72064	1.17357	2386.73	27.78	2383.53	15.7918	2367.09	29.6719	-0.82951	2386.73	27.78	Wang et al., 2018d
FJW1453-63	0.0857024	0.0011464	2.75279	0.0591398	0.231747	0.00389592	0.782509	0.699398	1331.48	11.805	1342.84	16.8699	1343.65	20.3896	0.905668	1331.48	11.805	Wang et al., 2018d
FJW1453-64	0.0730737	0.00125788	1.74593	0.0359374	0.172216	0.00194355	0.548283	0.0816921	1016.66	17.78	1025.66	14.482	1024.31	10.6883	0.746189	1016.66	17.78	Wang et al., 2018d
FJW1453-65	0.0736098	0.00130279	1.82748	0.0476289	0.180745	0.00345795	0.734066	2.30271	1031.48	11.115	1055.38	14.6967	1071.04	18.8791	3.69323	1031.48	11.115	Wang et al., 2018d
FJW1453-66	0.142705	0.00252512	11.5043	0.330484	0.538385	0.0121838	0.787775	0.35983	2261.11	20.864	2564.93	26.3011	2776.69	51.0591	18.5679	2261.11	20.864	Wang et al., 2018d
FJW1453-67	0.0710379	0.00135054	1.74575	0.0390444	0.178325	0.00210072	0.52672	0.0723267	958.33	11.11	1025.59	11.3711	1057.82	11.4927	9.40494	958.33	11.11	Wang et al., 2018d
FJW1453-68	0.158838	0.00230364	11.4825	0.228974	0.524225	0.00717462	0.686328	0.362914	2443.51	16.95	2563.16	15.4252	2717.07	30.3439	10.0682	2443.51	16.95	Wang et al., 2018d
FJW1453-69	0.110295	0.00154167	4.34864	0.0891212	0.267704	0.00401223	0.731315	0.460356	1805.56	25.434	1702.64	22.5293	1529.13	20.4029	-18.0769	1805.56	25.434	Wang et al., 2018d
FJW1453-70	0.0713951	0.00119667	1.38088	0.0289184	0.138531	0.00173927	0.599517	0.368423	968.515	17.75	880.816	16.6597	836.353	9.84785	-5.31627	836.353	9.84785	Wang et al., 2018d
FJW1453-71	0.0894601	0.0016043	3.11674	0.0653033	0.252767	0.00273884	0.517143	0.728191	1413.88	11.115	1436.83	13.3473	1452.73	14.0934	2.67398	1413.88	11.115	Wang et al., 2018d
FJW1453-72	0.111929	0.00207791	5.0849	0.101192	0.329447	0.00236169	0.360224	0.310474	1831.48	21.315	1833.59	12.3015	1835.7	11.4517	0.229701	1831.48	21.315	Wang et al., 2018d
FJW1453-73	0.0704497	0.00105434	1.25235	0.0236943	0.128914	0.0014922	0.611798	0.591089	942.59	15.045	824.465	10.731	781.668	8.52089	-5.47505	781.668	8.52089	Wang et al., 2018d
FJW1453-74	0.0980488	0.00185483	2.46346	0.0648707	0.181733	0.00332908	0.695645	0.997953	1587.35	21.3425	1261.38	15.7794	1076.43	18.1604	-47.4637	1587.35	21.3425	Wang et al., 2018d
FJW1453-75	0.0666714	0.00147896	1.29131	0.0345986	0.140781	0.00211548	0.560838	0.478644	827.775	9.25	841.88	12.7446	849.079	11.9543	0.84786	849.079	11.9543	Wang et al., 2018d
FJW1453-76	0.0778626	0.00140904	2.13591	0.0440254	0.198951	0.00196321	0.478739	0.856803	1143.53	12.495	1160.5	13.7021	1169.69	10.5556	2.23651	1143.53	12.495	Wang et al., 2018d
FJW1453-77	0.058454	0.00105401	0.714191	0.0178364	0.0886742	0.00153225	0.691895	0.455716	546.33	11.1113	547.232	9.19162	547.692	9.07299	0.0839667	547.692	9.07299	Wang et al., 2018d
FJW1453-78	0.0659986	0.00135813	1.20524	0.0272001	0.132444	0.00122725	0.410588	0.87609	805.555	19.46	803.004	10.2687	801.792	6.9861	-0.15116	801.792	6.9861	Wang et al., 2018d
FJW1453-79	0.0717705	0.00124004	1.66091	0.0371998	0.167773	0.00239104	0.636316	0.736003	988.89	17.778	993.725	14.7918	999.827	13.1992	0.610308	988.89	17.778	Wang et al., 2018d
																		Wang et al., 2018d
Laikeng Fm, late Cryogenian, N 25°41'44.1", 116°08'17.4"																		Wang et al., 2018d
FJW1445-01	0.0762624	0.00175738	1.58304	0.0425827	0.152454	0.00211552	0.515865	0.383847	1101.85	15.0475	963.564	16.0593	914.706	11.8335	-5.34132	914.706	11.8335	Wang et al., 2018d
FJW1445-02	0.0671564	0.00160934	1.38956	0.0350094	0.149436	0.000986102	0.261914	0.254299	842.59	54.63	884.508	14.8774	897.801	5.53038	1.48056	897.801	5.53038	Wang et al., 2018d
FJW1445-03	0.0784833	0.00153153	1.80031	0.0442095	0.165534	0.00246767	0.60706	0.417814	1158.95	24.535	1045.57	15.6072	987.458	13.6484	-5.88508	987.458	13.6484	Wang et al., 2018d
FJW1445-04	0.151899	0.00304901	7.73121	0.162555	0.368733	0.00230795	0.297688	0.557396	2368.52	22.22	2200.24	17.3755	2023.44	10.8699	-17.0543	2368.52	22.22	Wang et al., 2018d
FJW1445-05	0.0874576	0.00171366	2.08986	0.0469873	0.166525	0.00183612	0.490407	0.672781	1372.22	25	1145.48	15.2373	992.939	10.1467	-15.3627	992.939	10.1467	Wang et al., 2018d
FJW1445-06	0.179833	0.00308226	12.3473	0.223246	0.497548	0.0028644	0.31841	0.865166	2651.55	20.37	2631.17	17.1821	2603.25	12.3303	-1.85533	2651.55	20.37	Wang et al., 2018d
FJW1445-07	0.0838294	0.00165886	2.05011	0.0499049	0.177535	0.00251685	0.58238	0.672015	1288.58	18.52	1132.33	16.0801	1053.5	13.7785	-22.3147	1288.58	18.52	Wang et al., 2018d
FJW1445-08	0.0865708	0.0014421	2.73833	0.0561987	0.229546	0.00275171	0.584107	0.745355	1350.92	22.23	1338.92	16.102	1332.12	14.427	-1.41143	1350.92	22.23	Wang et al., 2018d
FJW1445-09	0.0680991	0.00193	1.25754	0.0392881	0.133912	0.00176059	0.420823	0.471345	872.215	20.065	826.801	16.3249	810.143	10.0091	-2.05624	810.143	10.0091	Wang et al., 2018d
FJW1445-10	0.0771884	0.00150526	1.99932	0.0436147	0.187914	0.00183723	0.448183	0.464882	1127.79	24.09	1115.28	16.4421	1110.06	9.97006	-1.59638	1127.79	24.09	Wang et al., 2018d
FJW1445-11	0.0719148	0.00152383	1.60469	0.038792	0.161728	0.00188187	0.481342	1.08464	983.335	22.22	972.04	17.0023	966.373	10.4425	-0.586439	966.373	10.4425	Wang et al., 2018d
FJW1445-12	0.0749455	0.00161927	1.81237	0.0458901	0.175198	0.00231309	0.521423	0.489346	1133.34	22.2225	1049.93	16.6656	1040.69	12.6882	-8.90229	1133.34	22.2225	Wang et al., 2018d
FJW1445-13	0.0775794	0.00156125	1.88241	0.043974	0.175923	0.00208686	0.507795	0.939648	1136.12	26.625	1074.91	15.3599	1044.66	11.4402	-8.75428	1136.12	26.625	Wang et al., 2018d
FJW1445-14	0.0823215	0.00163668	2.33484	0.0517423	0.205732	0.00201402	0.441745	0.501378	1253.7	19.44	1222.95	14.4166	1206.04	10.7679	-3.95172	1253.7	19.44	Wang et al., 2018d
FJW1445-15	0.0750653	0.00132753	1.84565	0.0376603	0.178212	0.00181389	0.498816	0.530496	1070.06	26.385	1061.88	16.2733	1057.2	9.92443	-1.21664	1070.06	26.385	Wang et al., 2018d
FJW1445-16	0.0924484	0.00181113	1.53844	0.0383299	0.120393	0.00185322	0.617831	0.868528	1476.86	24.4612	945.881	17.5257	732.826	10.6629	-29.0731	732.826	10.6629	Wang et al., 2018d
FJW1445-17	0.162437	0.00315014	10.4974	0.218118	0.469123	0.00349962	0.359024	0.965137	2481.17	24.09	2479.69	20.0799	2479.71	15.3562	-0.0587223	2481.17	24.09	Wang et al., 2018d
FJW1445-18	0.15183	0.00291859	4.76908	0.10856	0.212057	0.00258549	0.535617	1.05781	2366.36	22.083	1779.47	21.9706	1239.77	13.7511	-90.8712	2366.36	22.083	Wang et al., 2018d
FJW1445-19	0.0775325	0.00113021	2.05313	0.0416513	0.192219	0.00271196	0.695464	0.63652	1144.45	24.99	1133.34	16.0411	1133.39	14.6638	-0.976114	1144.45	24.99	Wang et al., 2018d
FJW1445-20	0.0826562	0.00234464	2.36479	0.071362	0.207964	0.00214122	0.341192	0.22846	1261.11	18.51	1232.03	15.266	1217.96	11.4268	-3.54241	1261.11	18.51	Wang et al., 2018d
FJW1445-21	0.22465	0.00536658	17.7028	0.44698	0.570495	0.00466439	0.323815	0.516405	3014.5	27.78	2973.73	23.2664	2909.85	19.146	-3.59635	3014.5	27.78	Wang et al., 2018d
FJW1445-22	0.0875354	0.00167526	2.8378	0.0592099	0.234989	0.00195295	0.398318	1.74822	1372.22	23.15	1365.59	17.1767	1360.6	10.194	-0.854753	1372.22	23.15	Wang et al., 2018d
FJW1445-23	0.0737401	0.00147148	1.69283	0.0397549	0.166496	0.00206155	0.527245	0.396845	1035.19	22.23	1005.83	14.9918	992.777	11.3928	-1.31482	992.777	11.3928	Wang et al., 2018d
FJW1445-24	0.0837321	0.00171609	2.55331	0.0570133	0.221188	0.00196029	0.396904	1.30996	1287.04	26.2375	1287.38	17.2563	1288.15	10.348	0.0862725	1287.04	26.2375	Wang et al., 2018d
FJW1445-25	0.0723108	0.00115998	1.54963	0.0304536	0.155472	0.00176498	0.577663	0.0951301	994.445	20.37	950.344	16.1924	931.567	9.84687	-2.01566	931.567	9.84687	Wang et al., 2018d
FJW1445-26	0.0767817	0.00215832	1.88498	0.0571674	0.178029	0.0020268	0.375388	0.67805	1116.66	19.445	1075.82	14.7267	1056.2	11.0911	-5.72482	1116.66	19.445	Wang et al., 2018d
FJW1445-27	0.0736128	0.00111249	1.72374	0.0334435	0.169961	0.00206787	0.627098	0.466798	1031.48	28.74	1017.42	14.9164	1011.9	11.3939	-1.93594	1031.48	28.74	Wang et al., 2018d
FJW1445-28	0.120821	0.0017546	3.11867	0.0586725	0.178577	0.00213579	0.635722	1.42122	1968.21	25.9262	1437.31	17.3742	1059.2	11.682	-85.8212	1968.21	25.9262	Wang et al., 2018d
FJW1445-29	0.107157	0.00181768	2.52555	0.0518679	0.162767	0.00188447	0.563743	0.660504	1751.54	20.88	1279.42	17.8725	972.133	10.4476	-31.6095	972.133	10.4476	Wang et al., 2018d
FJW1445-30	0.0752564	0.00288327	1.84205	0.0737977	0.177616	0.00208029	0.292347	0.492877	1075.93	25	1060.59	15.3514	1053.94	11.3878	-2.08654	1075.93	25	Wang et al., 2018d
FJW1445-31	0.0779351	0.00186444	2.0136	0.056264	0.187401	0.00270562	0.516701	0.348664	1146.3	25.4625	1120.11	16.306	1107.28	14.6889	-3.52399	1146.3	25.4625	Wang et al., 2018d
FJW1445-32	0.0674235	0.00228509	1.28503	0.0469482	0.138402	0.00188825	0.373434	0.396127	849.995	11.1	839.092	17.4112	835.618	10.6926	-0.415695	835.618	10.6926	Wang et al., 2018d
FJW1445-33	0.0741818	0.00114254	1.76606	0.0365407	0.172913	0.00238894	0.66774	0.473932	1055.56	26.85	1033.08	17.1859	1028.14	13.1298	-2.66706	1055.56	26.85	Wang et al., 2018d
FJW1445-34	0.0713376	0.00139842	1.56403	0.0362637	0.159167	0.00197086	0.534045	0.421854	968.515	22.23	956.065	17.8078	952.145	10.9605	-0.411715	952.145	10.9605	Wang et al., 2018d
FJW1445-35	0.0722087	0.00142248	1.54556	0.0364382	0.155247	0.00201076	0.549373	0.382341	991.665	22.22	948.725	14.785	930.308	11.2203	-1.97975	930.308	11.2203	Wang et al., 2018d
FJW1445-36	0.0783642	0.00148685	2.0631	0.0448335	0.191231	0.00202601	0.487531	0.623804	1166.67	25.31	1136.65	14.5139	1128.04	10.9639	-3.42463	1166.67	25.31	Wang et al., 2018d
FJW1445-37	0.078921	0.00152363	2.06894	0.0439904	0.190204	0.00169458	0.419018	0.853846	1170.06	20.8312	1138.58	15.2406	1122.48	9.17824	-4.23878	1170.06	20.8312	Wang et al., 2018d
FJW1445-38	0.0811202	0.0012228	2.33214	0.0425285	0.208758	0.00214244	0.562781	0.928139	1233.33	26.85	1222.13	15.1574	1222.2	11.4258	-0.910664	1233.33	26.85	Wang et al., 2018d
FJW1445-39	0.0758029	0.00153736	1.94756	0.0475795	0.186418	0.00253912	0.557527	0.557275	1100	22.215	1097.61	17.9686	1101.94	13.7963	0.176416	1100	22.215	Wang et al., 2018d
FJW1445-40	0.0724999	0.00121546	1.67361	0.0362685	0.167612	0.00230161	0.633652	0.571424	1011.11	25.4625	998.556	16.483	998.938	12.7073	0.038271	998.938	12.7073	Wang et al., 2018d
FJW1445-41	0.135919	0.0027363	7.52868	0.164642	0.401089	0.00342572	0.390561	0.992737	2175.62	26.55	2176.41	19.008	2174.05	15.7618	-0.0721791	2175.62	26.55	Wang et al., 2018d
FJW1445-42	0.075404	0.00209586	1.8949	0.0579914	0.182331	0.00233526	0.418501	0.35599	1079.63	18.52	1079.3	16.6128	1079.7	12.7325	0.00602526	1079.63	18.52	Wang et al., 2018d
FJW1445-43	0.0776882	0.00157452	2.06699	0.0475765	0.193349	0.00210954	0.474012	1.91849	1138.89	22.215	1137.94	14.9372	1139.49	11.3956	0.0525575	1138.89	22.215	Wang et al., 2018d
FJW1445-44	0.078174	0.00218709	1.92216	0.0573159	0.178239	0.00183867	0.345951	0.739919	1151.55	18.515	1088.82	16.89	1057.35	10.0598	-8.90941	1151.55	18.515	Wang et al., 2018d
FJW1445-45	0.0819827	0.00176771	2.39897	0.0560675	0.211959	0.00191126	0.385817	0.679945	1255.55	22.2225	1242.29	16.8834	1239.25	10.166	-1.31565	1255.55	22.2225	Wang et al., 2018d
FJW1445-46	0.0729674	0.00109037	1.70974	0.0330055	0.1701	0.00207885	0.633084	0.795363	1012.96	26.85	1012.19	14.9033	1012.66	11.453	-0.0294307	1012.96	26.85	Wang et al., 2018d
FJW1445-47	0.0751096	0.00117903	1.84315	0.0342146	0.178081	0.00176452	0.533774	0.424489	1072.22	28.71	1060.99	15.8804	1056.48	9.65538	-1.49013	1072.22	28.71	Wang et al., 2018d
FJW1445-48	0.0831331	0.00166596	2.00132	0.0461407	0.174864	0.00199339	0.494451	0.671631	1272.21	24.54	1115.96	15.3381	1038.86	10.9376	-22.4629	1272.21	24.54	Wang et al., 2018d
FJW1445-49	0.078761	0.00241698	2.12987	0.070413	0.196174	0.00241245	0.371977	0.382315	1166.36	27.78	1158.54	17.4237	1154.74	13.0012	-1.00672	1166.36	27.78	Wang et al., 2018d
FJW1445-50	0.0833928	0.00150062	2.40092	0.0488276	0.208881	0.00197932	0.465939	1.09135	1279.63	24.09	1242.88	17.7641	1222.85	10.5548	-4.64316	1279.63	24.09	Wang et al., 2018d
FJW1445-51	0.0827523	0.00164938	1.86954	0.0457783	0.163644	0.00232767	0.58089	0.632641	1264.81	18.7537	1070.37	15.2702	976.998	12.8949	-9.55671	976.998	12.8949	Wang et al., 2018d
FJW1445-52	0.152546	0.00322216	4.0512	0.100917	0.184723	0.00243925	0.530095	0.842464	2375.93	18.2865	1644.54	21.8771	1092.72	13.2727	-117.432	2375.93	18.2865	Wang et al., 2018d
FJW1445-53	0.168563	0.00278261	4.65989	0.0913554	0.19116	0.00202154	0.539421	0.474801	2543.51	27.7775	1760.07	19.2466	1127.65	10.9404	-125.558	2543.51	27.7775	Wang et al., 2018d
FJW1445-54	0.0937866	0.00159908	2.30785	0.0494513	0.1789	0.00232172	0.605664	0.791701	1505.56	20.055	1214.7	15.8173	1060.96	12.6956	-41.9049	1505.56	20.055	Wang et al., 2018d
FJW1445-55	0.0948376	0.00194558	2.31971	0.0533507	0.178047	0.00185106	0.452041	0.772797	1525	25.005	1218.34	15.4635	1056.3	10.1292	-44.372	1525	25.005	Wang et al., 2018d
FJW1445-56	0.0656939	0.00132952	1.10517	0.0271176	0.122005	0.00169268	0.565424	1.11829	798.15	25.3	755.848	15.7618	742.096	9.72518	-1.85317	742.096	9.72518	Wang et al., 2018d
FJW1445-57	0.0864388	0.00148446	2.2078	0.045294	0.185108	0.00207742	0.54704	0.770418	1347.83	18.9825	1183.52	15.9244	1094.82	11.3002	-23.1097	1347.83	18.9825	Wang et al., 2018d
FJW1445-58	0.0785587	0.00141835	1.83912	0.0413618	0.169675	0.00227537	0.596272	0.334836	1161.12	26.54	1059.55	17.0928	1010.32	12.5402	-14.9254	1161.12	26.54	Wang et al., 2018d
FJW1445-59	0.0949397	0.00294066	2.96273	0.0992272	0.232347	0.00296011	0.380393	1.02027	1527.79	58.38	1398.12	18.2804	1346.79	15.4845	-13.4392	1527.79	58.38	Wang et al., 2018d
FJW1445-60	0.0769648	0.00139608	1.95496	0.0456835	0.18369	0.00270611	0.630433	0.43429	1120.37	23.155	1100.15	16.2397	1087.1	14.7376	-3.06026	1120.37	23.155	Wang et al., 2018d
FJW1445-61	0.084189	0.00168803	2.41967	0.0546211	0.208317	0.00216041	0.459416	0.396367	1298.15	19.44	1248.46	15.5883	1219.85	11.5259	-6.41913	1298.15	19.44	Wang et al., 2018d
FJW1445-62	0.0905301	0.00192368	2.78522	0.0637579	0.222912	0.001898	0.371952	0.499581	1436.73	25.005	1351.58	17.6972	1297.24	10.005	-10.7525	1436.73	25.005	Wang et al., 2018d
FJW1445-63	0.0777181	0.00166679	1.96256	0.0489511	0.183064	0.00233124	0.510558	0.685957	1139.82	21.295	1102.76	16.8879	1083.69	12.7027	-5.1796	1139.82	21.295	Wang et al., 2018d
FJW1445-64	0.0783636	0.00149911	2.12079	0.0452235	0.196514	0.00185123	0.441773	0.561983	1166.67	25.31	1155.59	16.4207	1156.57	9.97378	-0.873643	1166.67	25.31	Wang et al., 2018d
FJW1445-65	0.0900372	0.0014962	3.02085	0.0588951	0.243664	0.0024844	0.522975	0.772399	1427.78	22.23	1412.9	17.3697	1405.71	12.8777	-1.56932	1427.78	22.23	Wang et al., 2018d
FJW1445-66	0.0709065	0.00122535	1.22616	0.0277764	0.125371	0.00183624	0.646556	0.422514	953.7	23.76	812.591	17.8801	761.403	10.5185	-6.72285	761.403	10.5185	Wang et al., 2018d
FJW1445-67	0.0705872	0.00157991	1.48751	0.0368602	0.152906	0.00162586	0.429104	1.05725	946.29	25.0012	925.302	14.7763	917.232	9.09091	-0.879821	917.232	9.09091	Wang et al., 2018d
FJW1445-68	0.121149	0.00231004	6.00165	0.124683	0.358522	0.00295687	0.39699	0.521745	1973.15	20.37	1976.08	16.3684	1975.16	14.031	0.101863	1973.15	20.37	Wang et al., 2018d
FJW1445-69	0.0761335	0.00201486	1.80121	0.0531043	0.171562	0.00222921	0.440721	0.431993	1098.15	21.3	1045.9	16.5029	1020.71	12.266	-7.58662	1098.15	21.3	Wang et al., 2018d
FJW1445-70	0.187336	0.00356068	5.32558	0.135728	0.207149	0.00351708	0.666192	0.213135	2720.38	21.3	1872.98	19.2658	1213.61	18.782	-124.156	2720.38	21.3	Wang et al., 2018d
																		Wang et al., 2018d
Jiangshekeng, early Cryogenian, N 25°41'06.6", E 116°07'39.3"																		Wang et al., 2018d
FJW1441-01	0.0735667	0.00132667	1.91225	0.0606156	0.188354	0.00491017	0.8224	0.289519	1029.32	14.37	1085.37	16.7785	1112.45	26.6362	7.4728	1029.32	14.37	Wang et al., 2018d
FJW1441-02	0.0797229	0.00121042	2.13795	0.0380901	0.194676	0.00181476	0.523229	0.829055	1190.74	11.1113	1161.16	10.4482	1146.66	9.79237	-3.8446	1190.74	11.1113	Wang et al., 2018d
FJW1441-03	0.0772205	0.00143297	2.00177	0.0468984	0.188599	0.00269727	0.610438	0.129005	1127.79	12.66	1116.11	13.1651	1113.78	14.6287	-1.25741	1127.79	12.66	Wang et al., 2018d
FJW1441-04	0.0844945	0.00125235	2.61819	0.0449303	0.224719	0.00194364	0.504011	0.353248	1305.56	12.035	1305.76	13.6143	1306.76	10.2305	0.0921877	1305.56	12.035	Wang et al., 2018d
FJW1441-05	0.0927203	0.00165335	3.09047	0.0658644	0.241616	0.00282018	0.547679	0.79832	1483.34	11.11	1430.33	13.2735	1395.09	14.6423	-6.32524	1483.34	11.11	Wang et al., 2018d
FJW1441-06	0.0698878	0.00202145	1.79246	0.0553513	0.186059	0.00201227	0.350233	0.327159	924.07	17.595	1042.72	13.4703	1099.99	10.937	15.9929	924.07	17.595	Wang et al., 2018d
FJW1441-07	0.0890873	0.00236885	3.39165	0.098129	0.27228	0.00310509	0.394159	0.444886	1405.87	16.606	1502.47	22.5983	1552.36	15.7331	9.43719	1405.87	16.606	Wang et al., 2018d
FJW1441-08	0.0742536	0.00145264	1.84248	0.0452733	0.180172	0.00267882	0.605086	0.361756	1050.01	14.355	1060.75	15.1238	1067.91	14.6325	1.67706	1050.01	14.355	Wang et al., 2018d
FJW1441-09	0.0791878	0.00214752	2.14731	0.0620228	0.196565	0.00195406	0.344171	0.458332	1176.86	18.146	1164.19	14.3834	1156.84	10.5273	-1.73008	1176.86	18.146	Wang et al., 2018d
FJW1441-10	0.0925391	0.00171911	3.29225	0.0918851	0.257575	0.00536494	0.746291	0.249276	1479.63	11.1113	1479.22	21.0969	1477.43	27.5017	-0.149233	1479.63	11.1113	Wang et al., 2018d
FJW1441-11	0.076247	0.00112282	1.97065	0.0366672	0.187589	0.00213348	0.611242	0.546322	1101.85	11.1075	1105.53	11.483	1108.3	11.5809	0.58229	1101.85	11.1075	Wang et al., 2018d
FJW1441-12	0.0803168	0.00115986	2.46258	0.0460689	0.222243	0.00264299	0.635696	0.209208	1205.56	28.7025	1261.12	14.8191	1293.72	13.9398	6.81473	1205.56	28.7025	Wang et al., 2018d
FJW1441-13	0.225577	0.00381926	18.6681	0.351752	0.598218	0.00494661	0.438846	0.559356	3020.68	27.765	3024.82	21.7107	3022.65	19.9522	0.0653273	3020.68	27.765	Wang et al., 2018d
FJW1441-14	0.158869	0.00266774	10.1323	0.217113	0.461622	0.00614456	0.621193	0.750946	2443.51	29.62	2446.92	15.6371	2446.71	27.1004	0.130754	2443.51	29.62	Wang et al., 2018d
FJW1441-15	0.0785696	0.00154398	2.14839	0.0485419	0.19832	0.00221147	0.493527	0.553267	1161.12	12.9625	1164.53	13.6698	1166.29	11.8967	0.443729	1161.12	12.9625	Wang et al., 2018d
FJW1441-16	0.0754198	0.00132092	1.89424	0.0407131	0.182578	0.00227459	0.579637	0.598079	1079.63	11.1113	1079.07	12.028	1081.04	12.3992	0.13071	1079.63	11.1113	Wang et al., 2018d
FJW1441-17	0.131638	0.00282428	7.61624	0.193198	0.41965	0.00567926	0.533509	0.432902	2120.06	26.25	2186.78	14.527	2258.89	25.7888	6.146	2120.06	26.25	Wang et al., 2018d
FJW1441-18	0.0761222	0.00184018	1.92951	0.0517191	0.183992	0.00213051	0.431998	0.632146	1098.15	13.4175	1091.37	12.1831	1088.75	11.5999	-0.863644	1098.15	13.4175	Wang et al., 2018d
FJW1441-19	0.0690613	0.0011403	1.4225	0.0313833	0.149967	0.0021944	0.663243	0.691066	901.85	11.1113	898.41	11.5982	900.778	12.3012	0.262797	900.778	12.3012	Wang et al., 2018d
FJW1441-20	0.0726383	0.00172837	1.69192	0.0457096	0.168808	0.00215998	0.473617	0.72661	1005.55	15.0412	1005.49	13.5723	1005.54	11.9131	-0.00127668	1005.55	15.0412	Wang et al., 2018d
FJW1441-21	0.122049	0.00171843	5.96225	0.0945329	0.354491	0.00258428	0.459791	0.696832	1987.04	21.285	1970.35	12.1023	1956.01	12.2993	-1.58642	1987.04	21.285	Wang et al., 2018d
FJW1441-22	0.0809359	0.00152973	2.5297	0.0542743	0.226665	0.00230128	0.473217	0.752164	1220.37	11.1113	1280.61	13.327	1316.99	12.0938	7.33672	1220.37	11.1113	Wang et al., 2018d
FJW1441-23	0.0755283	0.00106048	1.92198	0.0381006	0.185204	0.00259172	0.705921	0.933282	1083.34	12.035	1088.76	12.3875	1095.34	14.0966	1.09599	1083.34	12.035	Wang et al., 2018d
FJW1441-24	0.0720822	0.00169562	1.72093	0.0505607	0.172581	0.00303776	0.599114	0.350308	987.965	10.65	1016.37	16.1574	1026.32	16.7005	3.73686	987.965	10.65	Wang et al., 2018d
FJW1441-25	0.216782	0.00508767	17.3986	0.459977	0.579283	0.00705085	0.460393	0.493812	2957.1	30.88	2957.07	16.4078	2945.82	28.7808	-0.382609	2957.1	30.88	Wang et al., 2018d
FJW1441-26	0.0839429	0.00191893	2.42208	0.0615375	0.209457	0.00232238	0.436402	0.322998	1291.05	14.815	1249.17	13.7375	1225.92	12.3783	-5.31247	1291.05	14.815	Wang et al., 2018d
FJW1441-27	0.0751264	0.0017948	1.7427	0.0501595	0.165109	0.00265042	0.557719	0.0618373	1072.22	14.815	1024.46	17.5731	985.104	14.6645	-3.9956	985.104	14.6645	Wang et al., 2018d
FJW1441-28	0.0750536	0.00150074	2.05222	0.0460867	0.198377	0.00202787	0.455194	0.572439	1070.06	13.8863	1133.03	12.1557	1166.6	10.9085	8.27501	1070.06	13.8863	Wang et al., 2018d
FJW1441-29	0.078958	0.00123813	2.18333	0.0414862	0.201366	0.00216093	0.56477	0.662414	1172.22	12.035	1175.74	12.624	1182.65	11.5954	0.881635	1172.22	12.035	Wang et al., 2018d
FJW1441-30	0.0711809	0.00117488	1.40643	0.0336931	0.148973	0.00258663	0.724778	0.745224	962.65	11.115	891.655	19.5325	895.204	14.515	0.396529	895.204	14.515	Wang et al., 2018d
FJW1441-31	0.105748	0.00180204	4.49289	0.0857036	0.307911	0.0026394	0.449372	1.03842	1727.78	11.115	1729.66	11.2802	1730.42	13.009	0.15286	1727.78	11.115	Wang et al., 2018d
FJW1441-32	0.0961421	0.00186147	3.47365	0.0734559	0.261888	0.00222691	0.402112	0.608787	1550.31	12.0375	1521.25	10.5916	1499.49	11.3763	-3.38894	1550.31	12.0375	Wang et al., 2018d
FJW1441-33	0.113528	0.00328602	5.51327	0.172319	0.353468	0.00416891	0.377354	0.82506	1857.41	18.5188	1902.67	13.8953	1951.14	19.8561	4.80373	1857.41	18.5188	Wang et al., 2018d
FJW1441-34	0.0712675	0.00116107	1.32731	0.0301344	0.133994	0.00211875	0.696467	0.0494428	964.81	11.115	857.705	13.0837	810.612	12.0444	-5.80964	810.612	12.0444	Wang et al., 2018d
FJW1441-35	0.128637	0.00285549	6.07054	0.148943	0.341397	0.00356802	0.425965	1.0047	2079.32	20.8425	1986.02	19.0031	1893.39	17.147	-9.81981	2079.32	20.8425	Wang et al., 2018d
FJW1441-36	0.0812438	0.00184755	2.43944	0.0659644	0.217783	0.00318634	0.541063	0.936633	1227.78	9.25	1254.31	15.9227	1270.15	16.8671	3.33617	1227.78	9.25	Wang et al., 2018d
FJW1441-37	0.0750095	0.00151699	1.98808	0.0619867	0.191276	0.00453907	0.761099	0.338721	1133.34	13.89	1111.47	16.6702	1128.28	24.5626	-0.447788	1133.34	13.89	Wang et al., 2018d
FJW1441-38	0.0739532	0.00099772	1.81935	0.036335	0.178557	0.00262936	0.737335	0.410797	1040.44	15.2775	1052.45	12.2061	1059.08	14.382	1.76045	1040.44	15.2775	Wang et al., 2018d
FJW1441-39	0.111382	0.002502	5.09447	0.129177	0.331393	0.00389791	0.463876	0.442507	1821.91	12.03	1835.18	15.3561	1845.13	18.8732	1.25843	1821.91	12.03	Wang et al., 2018d
FJW1441-40	0.0727023	0.00174625	1.68607	0.0459125	0.168232	0.00215821	0.471118	0.142205	1005.55	9.3	1003.28	9.89806	1002.36	11.9092	-0.0915672	1005.55	9.3	Wang et al., 2018d
FJW1441-41	0.0722538	0.00146688	1.66629	0.0381236	0.167228	0.00176424	0.461113	0.569505	994.445	11.115	995.773	11.2	996.817	9.74363	0.104741	996.817	9.74363	Wang et al., 2018d
FJW1441-42	0.0706169	0.00107988	1.54063	0.0275206	0.158193	0.00146058	0.51687	0.243682	946.29	11.1075	946.755	11.2595	946.724	8.1295	-0.00326613	946.724	8.1295	Wang et al., 2018d
FJW1441-43	0.21759	0.00366508	16.7816	0.325048	0.558205	0.00533807	0.493715	0.724412	2962.65	27.78	2922.44	22.8336	2859.21	22.0841	-3.61785	2962.65	27.78	Wang et al., 2018d
FJW1441-44	0.230406	0.00411108	18.714	0.368409	0.584209	0.00485924	0.42251	0.431331	3054.64	29.325	3027.19	18.7157	2965.9	19.7733	-2.9919	3054.64	29.325	Wang et al., 2018d
FJW1441-45	0.0652371	0.00155192	1.22708	0.028889	0.136248	0.00103934	0.324016	1.13059	783.335	49.995	813.008	13.172	823.412	5.8966	1.26343	823.412	5.8966	Wang et al., 2018d
FJW1441-46	0.0728261	0.00132985	1.70536	0.036147	0.170142	0.00183112	0.507747	0.905918	1009.26	11.1075	1010.54	12.4163	1012.89	10.0878	0.358712	1009.26	11.1075	Wang et al., 2018d
FJW1441-47	0.176501	0.00298602	12.3985	0.228772	0.506276	0.00372877	0.399158	0.429746	2620.06	24.99	2635.07	15.8052	2640.71	15.9581	0.782004	2620.06	24.99	Wang et al., 2018d
FJW1441-48	0.0778178	0.00144621	2.07381	0.0445519	0.19399	0.00209057	0.501636	0.562843	1142.6	13.89	1140.19	12.2372	1142.95	11.2871	0.0308834	1142.6	13.89	Wang et al., 2018d
FJW1441-49	0.0839837	0.00161648	2.40929	0.0512023	0.208055	0.00187462	0.423969	0.538172	1292.28	13.6537	1245.37	12.283	1218.45	10.0033	-6.05961	1292.28	13.6537	Wang et al., 2018d
FJW1441-50	0.091364	0.00190831	3.72984	0.0886398	0.296146	0.00335724	0.477022	0.480474	1454.02	12.495	1577.79	13.4902	1672.17	16.6974	13.0459	1454.02	12.495	Wang et al., 2018d
FJW1441-51	0.206755	0.00387817	15.8223	0.321298	0.554019	0.00431019	0.383118	0.39611	2880.55	27.8	2866.13	12.6387	2841.87	17.8797	-1.36124	2880.55	27.8	Wang et al., 2018d
FJW1441-52	0.0840323	0.00165013	2.52402	0.0558671	0.218175	0.00222833	0.461435	0.974758	1294.44	12.65	1278.98	10.4227	1272.23	11.792	-1.74642	1294.44	12.65	Wang et al., 2018d
FJW1441-53	0.0769773	0.00139956	1.93511	0.0405617	0.182321	0.0019017	0.497617	0.547724	1120.37	13.285	1093.31	10.4356	1079.64	10.3687	-3.77245	1120.37	13.285	Wang et al., 2018d
FJW1441-54	0.0777234	0.00182899	2.07218	0.0543597	0.193597	0.00224457	0.441961	0.866123	1139.82	9.25	1139.65	10.578	1140.83	12.1225	0.0886776	1139.82	9.25	Wang et al., 2018d
FJW1441-55	0.16038	0.0031163	10.4673	0.241586	0.473141	0.00589322	0.539665	0.496766	2461.11	29.64	2477.02	12.472	2497.32	25.7886	1.45011	2461.11	29.64	Wang et al., 2018d
FJW1441-56	0.0916099	0.00173402	3.19222	0.0678236	0.252449	0.00243632	0.454226	0.758679	1461.12	16.605	1455.28	13.274	1451.09	12.5398	-0.690647	1461.12	16.605	Wang et al., 2018d
FJW1441-57	0.0799924	0.0016244	2.20202	0.0485786	0.199546	0.00172017	0.390754	0.544675	1198.15	12.65	1181.69	9.73717	1172.88	9.24425	-2.15426	1198.15	12.65	Wang et al., 2018d
FJW1441-58	0.0859626	0.00161181	2.8331	0.0706586	0.239989	0.00394673	0.659393	1.14827	1338.88	12.035	1364.34	15.1399	1386.64	20.5182	3.44385	1338.88	12.035	Wang et al., 2018d
FJW1441-59	0.0771446	0.00162443	2.03111	0.0509065	0.191574	0.00260417	0.542364	0.636042	1125	13.28	1125.99	12.1832	1129.9	14.0886	0.433465	1125	13.28	Wang et al., 2018d
FJW1441-60	0.110358	0.00170167	4.25758	0.0934569	0.301612	0.00471201	0.71172	0.784616	1805.56	18.7653	1685.2	23.4078	1699.3	23.3373	-6.25301	1805.56	18.7653	Wang et al., 2018d
FJW1441-61	0.219262	0.00344	17.4541	0.315474	0.575258	0.00516272	0.496535	0.483312	2975.01	26.2375	2960.13	21.2539	2929.37	21.1274	-1.55774	2975.01	26.2375	Wang et al., 2018d
FJW1441-62	0.0798934	0.00227103	2.24057	0.0705186	0.204361	0.00276121	0.429296	0.307494	1194.44	18.146	1193.84	15.9782	1198.7	14.7796	0.35522	1194.44	18.146	Wang et al., 2018d
FJW1441-63	0.0823331	0.00208933	2.33802	0.0625076	0.205943	0.00173285	0.314724	1.07266	1253.7	17.58	1223.92	11.2001	1207.17	9.26301	-3.85479	1253.7	17.58	Wang et al., 2018d
FJW1441-64	0.0803193	0.00172188	2.27803	0.0539386	0.205805	0.00206884	0.424552	0.651161	1205.56	14.81	1205.51	11.1575	1206.43	11.0603	0.0725712	1205.56	14.81	Wang et al., 2018d
FJW1441-65	0.103477	0.00307235	4.22137	0.135686	0.295347	0.00363638	0.383049	0.908691	1687.35	16.66	1678.18	16.3339	1668.19	18.0968	-1.14827	1687.35	16.66	Wang et al., 2018d
FJW1441-66	0.0802106	0.00172861	2.10298	0.0522939	0.190151	0.00235898	0.498897	0.758309	1266.66	13.8863	1149.78	12.6226	1122.19	12.7774	-12.8743	1266.66	13.8863	Wang et al., 2018d
FJW1441-67	0.070599	0.00123389	1.54161	0.0296313	0.158398	0.00126705	0.416168	0.565222	946.29	12.655	947.148	12.0585	947.868	7.05105	0.0758796	947.868	7.05105	Wang et al., 2018d
FJW1441-68	0.0715426	0.00103285	1.60625	0.0318903	0.162791	0.00221871	0.686475	0.444131	972.225	15.2812	972.648	14.2773	972.269	12.3003	-0.0390134	972.269	12.3003	Wang et al., 2018d
FJW1441-69	0.0721137	0.00113136	1.66954	0.0320248	0.167979	0.00185397	0.575385	0.252313	990.74	11.11	997.009	13.6712	1000.96	10.2326	0.395103	990.74	11.11	Wang et al., 2018d
FJW1441-70	0.107452	0.00295498	4.5513	0.131335	0.30641	0.00267857	0.30294	0.50774	1766.66	16.6725	1740.4	12.7362	1723.01	13.2173	-2.53338	1766.66	16.6725	Wang et al., 2018d
FJW1441-71	0.0750524	0.00166846	1.6421	0.0394085	0.158665	0.00143456	0.376745	0.445155	1070.06	13.8863	986.52	11.24	949.355	7.98142	-3.91474	949.355	7.98142	Wang et al., 2018d
FJW1441-72	0.0646144	0.00122786	1.09379	0.0246188	0.122692	0.00147993	0.535908	0.481318	761.115	12.9625	750.344	9.47663	746.042	8.49765	-0.576701	746.042	8.49765	Wang et al., 2018d
FJW1441-73	0.0759576	0.00130336	1.93601	0.0392271	0.184896	0.00199235	0.531813	0.536049	1094.44	11.725	1093.62	11.919	1093.67	10.8394	-0.0712881	1094.44	11.725	Wang et al., 2018d
FJW1441-74	0.0757068	0.0015402	1.80982	0.0401135	0.173372	0.00152499	0.396858	0.479191	1087.04	14.04	1049.01	12.2783	1030.66	8.3782	-5.47011	1087.04	14.04	Wang et al., 2018d
FJW1441-75	0.0725361	0.00120519	1.68428	0.0347557	0.168393	0.00206073	0.593042	0.517366	1011.11	11.1113	1002.6	11.3011	1003.25	11.3697	-0.783543	1011.11	11.1113	Wang et al., 2018d
FJW1441-76	0.0617173	0.00113248	0.910298	0.0189162	0.106982	0.00104337	0.469328	0.809888	664.83	14.443	657.216	12.2497	655.197	6.07597	-0.308055	655.197	6.07597	Wang et al., 2018d
FJW1441-77	0.114449	0.00338816	4.917	0.151106	0.311468	0.00256881	0.268371	1.1734	1872.22	23.16	1805.18	10.6258	1747.93	12.6268	-7.11126	1872.22	23.16	Wang et al., 2018d
FJW1441-78	0.0688538	0.0012493	1.21718	0.024856	0.128261	0.00120184	0.458854	0.356395	894.445	11.1113	808.486	8.51566	777.938	6.8668	-3.92682	777.938	6.8668	Wang et al., 2018d
FJW1441-79	0.0599138	0.00210322	1.20528	0.042277	0.14696	0.00154541	0.299797	0.459127	611.13	75.915	803.02	19.4681	883.898	8.68587	9.15023	883.898	8.68587	Wang et al., 2018d
FJW1441-80	0.071839	0.00175637	1.62897	0.0458982	0.164466	0.00230347	0.497077	0.459074	981.17	10.025	981.461	12.5889	981.548	12.7519	0.00892108	981.548	12.7519	Wang et al., 2018d
Louziba Fm, Cryogenian, N 25°41'04", E 116°04'17"
15CT-89-01	0.174639	3.53544	5.18317	28.4066	0.204169	0.00269556	0.242759	0.653483	2602.78	85.3842	1849.86	54.9588	1197.68	19.5505	57%	2602.78	85.3842	Qi et al. (2018)
15CT-89-02	0.0710316	3.45215	1.42991	4.3882	0.145043	0.00120589	0.451395	0.301853	966.665	38.4367	901.511	18.1535	873.115	11.7709	96%	873.115	11.7709	Qi et al. (2018)
15CT-89-03	0.0755524	3.45382	1.85896	5.41862	0.177872	0.00181053	0.45837	0.596952	1083.34	46.6985	1066.62	22.5106	1055.34	15.2733	98%	1083.34	46.6985	Qi et al. (2018)
15CT-89-04	0.0777676	3.4535	2.07092	5.5472	0.192267	0.00174725	0.438126	0.222926	1142.6	47.2039	1139.24	23.1208	1133.64	15.6565	99%	1142.6	47.2039	Qi et al. (2018)
15CT-89-05	0.151925	3.8849	5.34765	97.5189	0.13077	0.00878706	0.368716	0.370222	2368.52	204.315	1876.51	158.762	792.255	50.8484	18%	792.255	50.8484	Qi et al. (2018)
15CT-89-06	0.0760141	3.45318	1.78104	4.92747	0.169281	0.00127065	0.386571	0.320302	1095.37	46.9164	1038.56	20.8819	1008.15	13.1282	97%	1095.37	46.9164	Qi et al. (2018)
15CT-89-07	0.127135	3.61348	2.35035	31.2498	0.105198	0.00298249	0.214593	0.266385	2058.94	158.1	1227.67	96.1402	644.799	18.7899	37%	644.799	18.7899	Qi et al. (2018)
15CT-89-08	0.0833352	3.45597	2.01105	6.17399	0.174514	0.00188422	0.427495	0.46835	1276.85	51.877	1119.25	24.7919	1036.94	15.4067	92%	1276.85	51.877	Qi et al. (2018)
15CT-89-09	0.150673	3.46535	9.04178	20.6633	0.434956	0.00550668	0.562155	0.876166	2353.4	52.6	2342.24	42.7894	2328.02	35.6279	99%	2353.4	52.6	Qi et al. (2018)
15CT-89-10	0.0805524	3.45398	2.24582	6.38085	0.200874	0.00246344	0.516858	0.0990554	1210.8	44.8295	1195.48	25.3852	1180.02	18.5409	98%	1210.8	44.8295	Qi et al. (2018)
15CT-89-11	0.116508	3.45644	5.42766	11.4869	0.336824	0.00390244	0.574949	0.204414	1903.39	43.9135	1889.23	34.841	1871.37	27.9087	99%	1903.39	43.9135	Qi et al. (2018)
15CT-89-12	0.0877653	3.45804	2.24227	6.59818	0.185254	0.00159178	0.344837	0.524735	1377.47	56.0591	1194.37	25.923	1095.61	14.8508	91%	1377.47	56.0591	Qi et al. (2018)
15CT-89-13	0.0781028	3.4528	1.90942	4.98326	0.176529	0.00145463	0.444795	0.511735	1150.01	39.708	1084.38	21.3067	1047.98	14.0262	96%	1150.01	39.708	Qi et al. (2018)
15CT-89-14	0.0760139	3.45511	1.86746	5.98695	0.177522	0.00192377	0.417252	0.503095	1095.37	47.6315	1069.63	24.2566	1053.42	15.669	98%	1095.37	47.6315	Qi et al. (2018)
15CT-89-15	0.149391	3.46731	6.87999	22.9315	0.325268	0.00566732	0.528982	0.697026	2339.2	58.4593	2096.08	44.4909	1815.4	34.0542	85%	2339.2	58.4593	Qi et al. (2018)
15CT-89-16	0.0798684	3.45604	2.10039	6.58381	0.18996	0.0018687	0.370946	0.800381	1194.44	53.9555	1148.93	25.9099	1121.16	15.967	97%	1194.44	53.9555	Qi et al. (2018)
15CT-89-17	0.117443	3.45883	5.47022	12.6411	0.335932	0.00328641	0.440668	0.938431	1917.59	48.574	1895.93	35.8479	1867.07	25.9673	98%	1917.59	48.574	Qi et al. (2018)
15CT-89-18	0.0780796	3.4544	2.04968	5.93125	0.18949	0.00188786	0.427104	0.539252	1150.01	48.1032	1132.19	24.1279	1118.61	16.014	98%	1150.01	48.1032	Qi et al. (2018)
15CT-89-19	0.0847387	3.45337	2.4153	5.72907	0.205432	0.00156449	0.406234	0.284192	1309.26	40.0226	1247.16	24.0857	1204.43	15.6829	96%	1309.26	40.0226	Qi et al. (2018)
15CT-89-20	0.0930499	3.45757	2.85968	7.90881	0.221838	0.00184881	0.336277	0.540801	1500	56.2993	1371.36	28.8086	1291.58	17.2477	94%	1500	56.2993	Qi et al. (2018)
15CT-89-21	0.0751893	3.45623	1.72261	5.71715	0.166952	0.001922	0.43944	0.53788	1073.77	58.1556	1017	23.4205	995.297	15.2605	97%	995.297	15.2605	Qi et al. (2018)
15CT-89-22	0.0730754	3.45886	1.64067	6.48863	0.162913	0.00173302	0.319807	0.531623	1016.66	70.4268	985.969	26.2613	972.946	14.3912	98%	972.946	14.3912	Qi et al. (2018)
15CT-89-23	0.128234	3.45808	6.77967	14.6167	0.380903	0.00454575	0.570227	0.589875	2073.76	45.8443	2083.07	38.1549	2080.5	31.2302	99%	2073.76	45.8443	Qi et al. (2018)
15CT-89-24	0.150405	3.4637	8.91299	19.0521	0.427737	0.00425249	0.4732	0.645792	2350.31	50.767	2329.13	41.9426	2295.51	31.7457	98%	2350.31	50.767	Qi et al. (2018)
15CT-89-25	0.0931761	3.45476	2.89928	7.09097	0.224063	0.00247707	0.520216	0.454544	1491.66	43.931	1381.72	27.3321	1303.31	19.396	94%	1491.66	43.931	Qi et al. (2018)
15CT-89-26	0.12822	3.46472	5.83167	15.4065	0.326963	0.00257816	0.30653	0.307126	2073.76	54.9687	1951.13	38.3856	1823.64	23.6695	93%	2073.76	54.9687	Qi et al. (2018)
15CT-89-27	0.139214	3.46031	7.2323	17.0042	0.371796	0.00375666	0.43921	0.202996	2217.59	48.6825	2140.49	39.9521	2037.84	28.5543	95%	2217.59	48.6825	Qi et al. (2018)
15CT-89-28	0.0768642	3.45257	1.79383	4.64326	0.168665	0.00185863	0.650308	0.385533	1117.59	39.4703	1043.22	20.0289	1004.75	15.085	96%	1117.59	39.4703	Qi et al. (2018)
15CT-89-29	0.0620906	3.45534	0.905118	4.44017	0.105389	0.00114245	0.360808	0.554303	675.94	67.5316	654.459	17.8861	645.915	9.74643	98%	645.915	9.74643	Qi et al. (2018)
15CT-89-30	0.109803	3.45505	4.77723	9.13021	0.312777	0.00297766	0.539589	0.343254	1795.99	42.5107	1780.9	32.1379	1754.36	24.2303	98%	1795.99	42.5107	Qi et al. (2018)
15CT-89-31	0	3.45	0	3.51	0	0			error	#VALUE!					Error	error	#VALUE!	Qi et al. (2018)
15CT-89-32	0.0791521	3.45445	2.18977	6.04761	0.198465	0.00201982	0.452524	0.364348	1175.93	48.2588	1177.79	24.526	1167.07	16.8297	99%	1175.93	48.2588	Qi et al. (2018)
15CT-89-33	0.0820947	3.45495	2.47841	6.58132	0.217079	0.00233764	0.479398	0.914598	1247.83	48.4431	1265.75	25.9805	1266.42	18.6503	99%	1247.83	48.4431	Qi et al. (2018)
15CT-89-34	0.122648	3.45887	5.66091	12.9075	0.331077	0.00380964	0.524424	0.218148	1995.37	48.3158	1925.43	36.1841	1843.6	27.4346	95%	1995.37	48.3158	Qi et al. (2018)
15CT-89-35	0.0674251	3.45387	1.518	5.05596	0.16287	0.00181069	0.463754	0.130817	849.995	52.8595	937.673	20.9959	972.707	14.6804	96%	972.707	14.6804	Qi et al. (2018)
15CT-89-36	0.0723571	3.45263	1.77849	4.78685	0.177016	0.00139001	0.42907	0.0757582	995.99	37.7872	1037.63	20.4354	1050.65	13.8509	98%	995.99	37.7872	Qi et al. (2018)
15CT-89-37	0.114288	3.45586	4.48144	8.94649	0.281999	0.00219698	0.424266	0.347984	1868.83	44.2068	1727.54	31.5873	1601.42	20.8111	92%	1868.83	44.2068	Qi et al. (2018)
15CT-89-38	0.0797356	3.45514	2.06649	5.85283	0.187598	0.00159972	0.376248	0.395068	1190.74	50.7702	1137.77	23.927	1108.35	14.9801	97%	1190.74	50.7702	Qi et al. (2018)
15CT-89-39	0.0680181	3.45648	1.12812	4.98456	0.120446	0.00133326	0.352838	0.844043	877.775	65.5668	766.859	20.8798	733.132	11.137	95%	733.132	11.137	Qi et al. (2018)
15CT-89-40	0.080546	3.45506	2.08341	6.4602	0.186289	0.00217199	0.447886	0.116895	1210.18	49.182	1143.36	25.5781	1101.24	16.9234	96%	1210.18	49.182	Qi et al. (2018)
15CT-89-41	0.0898518	3.45625	3.17236	8.24623	0.255829	0.00280929	0.466852	0.708759	1433.34	49.7399	1450.46	29.4841	1468.47	21.6681	98%	1433.34	49.7399	Qi et al. (2018)
15CT-89-42	0.111894	3.45493	4.97761	9.68199	0.321371	0.00337794	0.579825	0.686912	1831.48	38.5206	1815.53	32.8674	1796.42	25.7488	98%	1831.48	38.5206	Qi et al. (2018)
15CT-89-43	0.0699211	3.45307	1.55073	4.79196	0.160526	0.0015803	0.467952	0.239618	927.775	45.1052	950.784	20.0122	959.702	13.7393	99%	959.702	13.7393	Qi et al. (2018)
15CT-89-44	0.0712409	3.45276	1.68119	4.93289	0.17012	0.00146587	0.417951	0.647753	964.81	42.5584	1001.43	20.7242	1012.77	13.7705	98%	964.81	42.5584	Qi et al. (2018)
15CT-89-45	0.0743632	3.4528	1.83953	5.01088	0.178386	0.00138868	0.400437	0.308972	1051.55	41.3844	1059.69	21.2491	1058.15	13.9112	99%	1051.55	41.3844	Qi et al. (2018)
15CT-89-46	0.0759788	3.45293	1.98225	5.20272	0.188207	0.00159664	0.437884	0.195109	1094.44	40.9707	1109.49	22.0604	1111.66	14.9975	99%	1094.44	40.9707	Qi et al. (2018)
15CT-89-47	0.0767271	3.4547	2.13529	6.13924	0.201353	0.00203006	0.427412	0.890428	1113.88	50.6187	1160.3	24.7258	1182.58	16.9791	98%	1113.88	50.6187	Qi et al. (2018)
15CT-89-48	0.0749642	3.4544	2.08095	6.16578	0.200265	0.00217336	0.445502	0.290454	1133.34	54.0595	1142.55	24.7769	1176.74	17.4415	97%	1133.34	54.0595	Qi et al. (2018)
15CT-89-49	0.187056	3.47019	14.0239	30.113	0.539417	0.00519275	0.451396	1.06319	2716.36	54.5855	2751.32	48.4761	2781.01	37.5621	98%	2716.36	54.5855	Qi et al. (2018)
15CT-89-50	0.0745775	3.45525	1.72235	5.88444	0.166407	0.0020305	0.444977	0.405698	1057.41	54.5428	1016.9	23.99	992.285	15.664	97%	992.285	15.664	Qi et al. (2018)
15CT-89-51	0.0752322	3.45431	1.89565	5.63817	0.181946	0.00184126	0.434771	0.560863	1075.93	49.3944	1079.57	23.201	1077.6	15.5465	99%	1075.93	49.3944	Qi et al. (2018)
15CT-89-52	0.0619254	3.45203	0.913656	3.93728	0.106118	0.000766321	0.369869	0.6229	672.235	46.6226	658.999	14.1761	650.166	8.43906	98%	650.166	8.43906	Qi et al. (2018)
15CT-89-53	0.0722405	3.45602	1.96786	6.65956	0.196836	0.00231433	0.408826	0.443684	994.445	29.6359	1104.58	26.2262	1158.3	17.8359	95%	994.445	29.6359	Qi et al. (2018)
15CT-89-54	0.0714466	3.45286	1.88696	5.27088	0.190003	0.00185246	0.467859	0.249919	970.06	42.8777	1076.51	22.1016	1121.39	15.9132	95%	970.06	42.8777	Qi et al. (2018)
15CT-89-55	0.0684606	3.45301	1.59582	4.92871	0.167571	0.00149501	0.411475	0.532087	883.33	45.6076	968.576	20.5859	998.716	13.7519	96%	998.716	13.7519	Qi et al. (2018)
15CT-89-56	0.0776838	3.45571	1.91674	6.1108	0.177352	0.00164806	0.356074	0.554819	1138.89	53.9411	1086.93	24.6217	1052.49	14.6897	96%	1138.89	53.9411	Qi et al. (2018)
15CT-89-57	0.139933	3.45961	8.22478	16.1592	0.422438	0.00410808	0.507081	0.175966	2227.78	47.7611	2256.07	40.0848	2271.54	31.1844	99%	2227.78	47.7611	Qi et al. (2018)
15CT-89-58	0.0919738	3.45889	2.79477	10.0056	0.215274	0.00235681	0.326552	0.379512	1533.34	56.8059	1354.14	33.1485	1256.86	18.652	92%	1533.34	56.8059	Qi et al. (2018)
15CT-89-59	0.164829	3.46597	10.9607	22.4884	0.480402	0.00543444	0.558195	0.763537	2505.86	52.5384	2519.8	44.5418	2529.02	36.5482	99%	2505.86	52.5384	Qi et al. (2018)
15CT-89-60	0.133711	3.45834	6.9606	13.8063	0.374608	0.00372694	0.518625	0.643134	2147.22	49.8438	2106.42	37.7888	2051.05	28.561	97%	2147.22	49.8438	Qi et al. (2018)
15CT-89-61	0.0977244	3.45577	3.63885	8.17047	0.26864	0.00246506	0.452558	0.344989	1581.17	46.3904	1558.07	29.722	1533.9	21.0304	98%	1581.17	46.3904	Qi et al. (2018)
15CT-89-62	0.073588	3.45642	1.55465	5.48996	0.153344	0.0015802	0.379519	0.235297	1031.48	59.7327	952.345	22.674	919.679	13.4387	96%	919.679	13.4387	Qi et al. (2018)
15CT-89-63	0.152196	3.45966	8.31945	15.8459	0.393163	0.00382181	0.523359	0.445963	2372.22	47.4915	2266.44	40.0103	2137.48	29.443	94%	2372.22	47.4915	Qi et al. (2018)
15CT-89-64	0.0869735	3.45699	1.73435	5.55374	0.143596	0.00114625	0.321667	0.144514	1361.11	54.1132	1021.37	22.8687	864.967	11.5107	83%	864.967	11.5107	Qi et al. (2018)
15CT-89-67	0.0839805	3.45667	2.26615	6.69236	0.194436	0.00130056	0.266021	0.324519	1292.28	54.1065	1201.82	26.1575	1145.36	14.4356	95%	1292.28	54.1065	Qi et al. (2018)
15CT-89-68	0.107506	3.46693	3.61731	11.6667	0.24367	0.00242766	0.323912	0.633308	1757.71	64.4767	1553.34	34.8921	1405.75	19.9507	90%	1757.71	64.4767	Qi et al. (2018)
15CT-89-69	0.127525	3.46881	5.56949	15.4971	0.314607	0.0021355	0.250457	0.77952	2064.81	59.9286	1911.39	38.487	1763.34	22.0635	91%	2064.81	59.9286	Qi et al. (2018)
15CT-89-70	0.0866357	3.4627	2.24001	8.18476	0.186139	0.00131281	0.213668	0.964225	1353.7	69.5058	1193.66	30.039	1100.42	14.0635	91%	1353.7	69.5058	Qi et al. (2018)
15CT-89-71	0.0812291	3.4632	2.10295	8.33039	0.186509	0.00162557	0.242612	1.18317	1227.78	74.844	1149.77	30.8253	1102.44	15.0139	95%	1227.78	74.844	Qi et al. (2018)
15CT-89-72	0.0856399	3.45483	2.16658	5.74507	0.181906	0.00121039	0.31697	0.381543	1331.48	47.21	1170.38	23.7485	1077.38	13.5784	91%	1331.48	47.21	Qi et al. (2018)
15CT-89-73	0.0784988	3.45512	1.86106	5.40222	0.170914	0.0013557	0.359472	0.49499	1161.12	46.042	1067.36	22.4629	1017.15	13.4608	95%	1161.12	46.042	Qi et al. (2018)
15CT-89-74	0.0775695	3.45575	1.85857	5.82087	0.172257	0.00147192	0.342012	0.456969	1144.45	54.9907	1066.48	23.7434	1024.53	13.8865	95%	1144.45	54.9907	Qi et al. (2018)
15CT-89-75	0.492516	3.8674	63.1101	340.564	0.881059	0.027866	0.586127	0.508682	4218.99	85.3889	4224.6	86.5232	4073.07	105.508	96%	4218.99	85.3889	Qi et al. (2018)
15CT-89-76	0.0880929	3.45528	2.66421	6.62154	0.217188	0.00202728	0.442915	0.463673	1384.26	47.0491	1318.59	26.2294	1267	17.6064	96%	1384.26	47.0491	Qi et al. (2018)
15CT-89-77	0.0814012	3.46047	1.7846	6.46722	0.157196	0.00147381	0.308033	0.205995	1231.48	67.7414	1039.86	25.8771	941.173	13.223	90%	941.173	13.223	Qi et al. (2018)
15CT-89-78	0.117397	3.49641	4.72139	22.7804	0.286493	0.00478072	0.35003	0.213318	1916.97	123.468	1771.04	48.9908	1623.98	29.8956	91%	1916.97	123.468	Qi et al. (2018)
15CT-89-79	0.151381	3.56559	8.56621	46.0322	0.403462	0.00334904	0.154921	0.218528	2361.42	108.63	2292.98	61.0066	2184.96	28.5602	95%	2361.42	108.63	Qi et al. (2018)
15CT-89-80	0.0894302	3.51887	3.04358	21.0616	0.243686	0.0021281	0.127989	0.643908	1413.27	150.328	1418.62	56.882	1405.83	19.0103	99%	1413.27	150.328	Qi et al. (2018)
15CT-89-81	0.0844841	3.49251	2.11141	12.4312	0.179071	0.00126049	0.124628	0.196091	1305.56	131.759	1152.54	43.0724	1061.9	13.5744	91%	1305.56	131.759	Qi et al. (2018)
15CT-89-82	0.07587	3.47211	1.96037	10.2002	0.18502	0.00147815	0.16353	1.01529	1091.66	104.857	1102.01	37.2897	1094.34	14.4884	99%	1091.66	104.857	Qi et al. (2018)
15CT-89-83	0.151738	3.49012	8.64958	34.4771	0.405169	0.00783122	0.487439	0.0823159	2365.74	70.3151	2301.79	51.5878	2192.8	43.2892	95%	2365.74	70.3151	Qi et al. (2018)
15CT-89-84	0.083456	3.46046	2.11131	7.47442	0.182121	0.00129752	0.227944	0.133715	1279.63	66.2077	1152.5	28.3628	1078.55	13.8261	93%	1279.63	66.2077	Qi et al. (2018)
15CT-89-85	0.109162	3.45854	4.6733	10.819	0.308502	0.00185389	0.274419	0.440129	1787.04	49.7723	1762.47	33.6471	1733.33	21.162	98%	1787.04	49.7723	Qi et al. (2018)
15CT-89-86	0.111246	3.45761	4.2959	9.08859	0.280166	0.002311	0.422684	0.415697	1820.37	47.1179	1692.58	31.5131	1592.2	21.0455	93%	1820.37	47.1179	Qi et al. (2018)
15CT-89-87	0.107881	3.45628	3.78008	8.16734	0.252926	0.00167901	0.340266	0.315062	1764.81	45.3566	1588.52	29.8757	1453.55	18.1904	91%	1764.81	45.3566	Qi et al. (2018)
15CT-89-88	0.201189	3.46781	14.2638	24.3759	0.512201	0.00314471	0.363048	0.713535	2836.11	53.5282	2767.41	47.1341	2666.02	32.2771	96%	2836.11	53.5282	Qi et al. (2018)
15CT-89-89	0.0778159	3.4526	1.71374	4.57111	0.15884	0.00098508	0.362945	0.564834	1142.6	38.0189	1013.68	19.5851	950.326	11.8139	93%	950.326	11.8139	Qi et al. (2018)
																		Qi et al. (2018)
Louziba Fm, Cryogenian, N 25°41'18", E 116°04'21"																		Qi et al. (2018)
15CT-84-01	0.0702815	3.45312	1.52771	4.75785	0.156609	0.00148989	0.452482	0.447667	936.72	49.5438	941.58	19.8457	937.903	13.2534	99%	937.903	13.2534	Qi et al. (2018)
15CT-84-02	0.0930075	3.4549	3.23937	7.16794	0.251223	0.00230968	0.47653	0.991037	1487.96	44.4169	1466.63	27.8518	1444.78	19.8692	98%	1487.96	44.4169	Qi et al. (2018)
15CT-84-03	0.158977	3.45926	10.2613	19.1926	0.463631	0.00509465	0.597584	0.350251	2455.55	47.5871	2458.62	42.892	2455.57	35.1407	99%	2455.55	47.5871	Qi et al. (2018)
15CT-84-04	0.0986079	3.46278	2.36809	8.5309	0.171825	0.00172274	0.305359	0.382747	1598.15	62.1354	1233.03	30.6491	1022.16	14.7154	81%	1598.15	62.1354	Qi et al. (2018)
15CT-84-05	0.137704	3.45695	7.65353	14.2028	0.399154	0.00405322	0.564717	0.583494	2198.46	44.1565	2191.16	38.6276	2165.14	30.2876	98%	2198.46	44.1565	Qi et al. (2018)
15CT-84-06	0.0841332	3.45648	2.45882	7.96704	0.208457	0.00220528	0.363694	0.864856	1295.37	48.6212	1260.02	29.1206	1220.59	17.8632	96%	1295.37	48.6212	Qi et al. (2018)
15CT-84-07	0.0629584	3.45267	0.952527	4.08268	0.108859	0.00100945	0.423592	0.515868	705.565	47.6491	679.418	15.3615	666.116	9.39457	98%	666.116	9.39457	Qi et al. (2018)
15CT-84-08	0.0779914	3.45413	1.91498	5.75751	0.175991	0.00177332	0.422795	0.241769	1146.3	47.6534	1086.32	23.5664	1045.03	15.065	96%	1146.3	47.6534	Qi et al. (2018)
15CT-84-09	0.0859695	3.45499	2.83964	7.20075	0.237885	0.00229872	0.436431	0.653428	1338.88	51.4335	1366.07	27.4781	1375.69	19.3093	99%	1338.88	51.4335	Qi et al. (2018)
15CT-84-10	0.0702856	3.45263	1.6986	4.89509	0.174304	0.00170213	0.486145	1.32695	936.72	41.678	1008	20.6253	1035.78	14.7457	97%	936.72	41.678	Qi et al. (2018)
15CT-84-11	0.0768673	3.45772	2.21529	7.58553	0.209186	0.00259334	0.408405	0.972233	1117.59	61.8991	1185.88	28.4893	1224.48	19.3134	96%	1117.59	61.8991	Qi et al. (2018)
15CT-84-12	0.152791	3.45864	10.0706	19.1958	0.475377	0.0048937	0.549328	0.704729	2377.47	47.1921	2441.27	42.7561	2507.1	34.9225	97%	2377.47	47.1921	Qi et al. (2018)
15CT-84-13	0.0752569	3.45336	2.02318	5.65791	0.194032	0.00158414	0.372231	0.716608	1075.93	44.2255	1123.33	23.3614	1143.18	15.2203	98%	1075.93	44.2255	Qi et al. (2018)
15CT-84-14	0.068233	3.45386	1.54024	5.25539	0.163484	0.00151434	0.364759	0.191518	875.925	47.4853	946.601	21.7772	976.107	13.6368	96%	976.107	13.6368	Qi et al. (2018)
15CT-84-15	0.0722094	3.45474	1.8129	6.12959	0.182526	0.00233107	0.460744	0.489122	991.665	53.7884	1050.13	24.7357	1080.76	17.4113	97%	991.665	53.7884	Qi et al. (2018)
15CT-84-16	0.163999	3.48724	10.9602	33.016	0.488417	0.00479126	0.327507	1.94263	2498.15	66.3286	2519.76	49.0419	2563.82	35.0412	98%	2498.15	66.3286	Qi et al. (2018)
15CT-84-17	0.0711736	3.45409	1.79174	5.93009	0.18215	0.00186467	0.383747	0.516849	962.65	46.1652	1042.46	24.1023	1078.71	15.6375	96%	962.65	46.1652	Qi et al. (2018)
15CT-84-18	0.0709586	3.45342	1.82394	5.60835	0.186186	0.0018045	0.404132	0.965197	966.665	41.7087	1054.1	23.0723	1100.68	15.5922	95%	966.665	41.7087	Qi et al. (2018)
15CT-84-19	0.115332	3.45606	5.74503	12.1049	0.360448	0.00342011	0.470546	0.182371	1884.88	43.7032	1938.17	35.6025	1984.3	27.2068	97%	1884.88	43.7032	Qi et al. (2018)
15CT-84-20	0.0776786	3.45713	1.98029	6.49468	0.185919	0.00185576	0.361723	1.01301	1138.89	59.7895	1108.82	25.728	1099.23	15.7581	99%	1138.89	59.7895	Qi et al. (2018)
15CT-84-21	0.0705748	3.45271	1.66608	4.98082	0.170635	0.00168975	0.466867	0.44803	946.29	41.7333	995.694	20.8663	1015.61	14.5496	98%	946.29	41.7333	Qi et al. (2018)
15CT-84-22	0.0667576	3.45366	1.53768	5.14444	0.166707	0.00180805	0.443424	0.489784	831.48	47.2803	945.576	21.3487	993.944	14.8199	95%	993.944	14.8199	Qi et al. (2018)
15CT-84-23	0.0704119	3.45424	1.65576	5.40509	0.169631	0.00161609	0.383778	0.454952	940.43	47.8001	991.757	22.3432	1010.08	14.2508	98%	940.43	47.8001	Qi et al. (2018)
15CT-84-24	0.0721252	3.45613	1.8444	6.72618	0.18369	0.001929	0.33757	1.29219	990.74	64.0331	1061.43	26.617	1087.1	15.9281	97%	990.74	64.0331	Qi et al. (2018)
15CT-84-25	0.17491	3.46777	12.5691	26.682	0.517838	0.00567858	0.521101	1.36022	2605.24	53.3723	2647.91	46.7966	2690	38.2012	98%	2605.24	53.3723	Qi et al. (2018)
15CT-84-26	0.0683917	3.45322	1.5881	5.09946	0.16789	0.00220662	0.564245	0.106464	879.63	46.6201	965.551	21.2068	1000.47	16.4243	96%	879.63	46.6201	Qi et al. (2018)
15CT-84-27	0.0838118	3.45767	2.56898	7.79176	0.222149	0.00238896	0.397137	1.50646	1287.96	56.516	1291.85	28.6303	1293.22	19.0166	99%	1287.96	56.516	Qi et al. (2018)
15CT-84-28	0.150687	3.46335	8.51621	20.2849	0.407248	0.00581146	0.608276	1.04238	2354.02	50.6034	2287.65	42.3863	2202.33	36.0139	96%	2354.02	50.6034	Qi et al. (2018)
15CT-84-29	0.18244	3.46908	13.4469	28.7827	0.530802	0.0053833	0.477377	0.609709	2675.01	54.5339	2711.56	47.8415	2744.83	37.7855	98%	2675.01	54.5339	Qi et al. (2018)
15CT-84-30	0.0662917	3.45717	1.20332	5.29013	0.131553	0.00151913	0.351079	0.825476	816.665	71.5679	802.118	22.3092	796.721	12.3244	99%	796.721	12.3244	Qi et al. (2018)
15CT-84-31	0.0813464	3.45684	2.15936	6.96518	0.191035	0.00203584	0.382508	0.559573	1231.48	56.1881	1168.07	26.9028	1126.98	16.5972	96%	1231.48	56.1881	Qi et al. (2018)
15CT-84-32	0.0697713	3.45783	1.52089	6.32202	0.157203	0.00211885	0.389861	0.941594	921.91	70.0897	938.837	25.9731	941.213	15.709	99%	941.213	15.709	Qi et al. (2018)
15CT-84-33	0.0693916	3.45776	1.52859	6.28902	0.159029	0.00198448	0.365532	0.450502	910.185	70.0505	941.932	25.8197	951.376	15.2187	99%	951.376	15.2187	Qi et al. (2018)
15CT-84-34	0.0740084	3.45493	2.01392	6.45079	0.195848	0.00246046	0.467478	0.394524	1042.6	57.1202	1120.21	25.5793	1152.98	18.3619	97%	1042.6	57.1202	Qi et al. (2018)
15CT-84-35	0.07642	3.45542	1.97405	6.18273	0.186374	0.0020634	0.429394	1.59595	1105.56	58.744	1106.69	24.8209	1101.7	16.5204	99%	1105.56	58.744	Qi et al. (2018)
15CT-84-36	0.0640773	3.45316	1.11327	4.36692	0.125281	0.00129675	0.443533	0.394052	744.14	50.3408	759.749	17.4316	760.889	11.1986	99%	760.889	11.1986	Qi et al. (2018)
15CT-84-37	0.19187	3.47505	14.1998	32.4266	0.533054	0.00598801	0.494826	0.579729	2758.34	56.8278	2763.15	49.2119	2754.31	39.4226	99%	2758.34	56.8278	Qi et al. (2018)
15CT-84-38	0.127698	3.46492	6.95457	18.2525	0.392773	0.00464442	0.459114	1.23547	2066.35	55.3934	2105.65	40.7413	2135.68	31.8642	98%	2066.35	55.3934	Qi et al. (2018)
15CT-84-39	0.075484	3.45461	1.99729	5.97038	0.19058	0.00221699	0.481075	0.274135	1081.17	50.4368	1114.59	24.2136	1124.52	17.2474	99%	1081.17	50.4368	Qi et al. (2018)
15CT-84-40	0.0773418	3.45963	2.00559	7.46609	0.187449	0.00248262	0.4031	0.872275	1131.49	68.6332	1117.4	28.5622	1107.54	18.1777	99%	1131.49	68.6332	Qi et al. (2018)
15CT-84-41	0.0774729	3.4574	1.84246	6.97626	0.170346	0.00222646	0.399431	1.83414	1144.45	60.2547	1060.74	27.4297	1014.02	16.5865	95%	1144.45	60.2547	Qi et al. (2018)
15CT-84-42	0.0755904	3.4564	1.89066	7.08182	0.178471	0.00225982	0.389215	0.251388	1084.26	58.2054	1077.81	27.6536	1058.62	16.9922	98%	1084.26	58.2054	Qi et al. (2018)
15CT-84-43	0.0697873	3.45427	1.53471	5.17769	0.158677	0.00179404	0.455863	0.758833	921.91	52.1352	944.385	21.4763	949.419	14.4554	99%	949.419	14.4554	Qi et al. (2018)
15CT-84-44	0.0787833	3.45496	2.06977	5.99135	0.189274	0.00177605	0.399991	0.622534	1168.52	49.9277	1138.86	24.3017	1117.44	15.6248	98%	1168.52	49.9277	Qi et al. (2018)
15CT-84-45	0.172915	3.46995	11.7931	26.5853	0.490994	0.0052631	0.479699	0.597859	2587.04	54.7281	2588.11	46.4257	2574.98	36.3597	99%	2587.04	54.7281	Qi et al. (2018)
15CT-84-46	0.0745287	3.45537	1.72313	5.736	0.166366	0.00163902	0.374196	0.599528	1057.41	54.8376	1017.19	23.4843	992.059	14.1927	97%	992.059	14.1927	Qi et al. (2018)
15CT-84-47	0.0760053	3.45634	2.03684	6.73748	0.192924	0.00211995	0.389185	1.15098	1094.44	58.2494	1127.9	26.3819	1137.2	16.9734	99%	1094.44	58.2494	Qi et al. (2018)
15CT-84-48	0.0775722	3.45739	2.19298	7.4215	0.204285	0.0027705	0.454826	0.256458	1136.12	61.5409	1178.81	28.0853	1198.3	19.8519	98%	1136.12	61.5409	Qi et al. (2018)
15CT-84-49	0.11577	3.47066	3.84731	13.9735	0.238418	0.00309382	0.369114	0.382933	1891.66	66.4061	1602.71	38.2293	1378.47	22.1321	84%	1891.66	66.4061	Qi et al. (2018)
15CT-84-50	0.129997	3.46728	7.52696	21.2529	0.416495	0.00490877	0.423222	0.690735	2097.84	57.6838	2176.2	42.8671	2244.55	33.3185	96%	2097.84	57.6838	Qi et al. (2018)
15CT-84-51	0.0722867	3.4553	1.67196	5.66494	0.166768	0.0017039	0.384185	0.482114	994.445	60.4684	997.932	23.2578	994.277	14.4407	99%	994.277	14.4407	Qi et al. (2018)
15CT-84-52	0.077361	3.45551	2.05924	6.43184	0.191513	0.00203654	0.406295	0.563413	1131.49	57.5516	1135.37	25.5068	1129.56	16.618	99%	1131.49	57.5516	Qi et al. (2018)
15CT-84-53	0.0729672	3.45425	1.68139	5.65986	0.165505	0.00225718	0.516463	0.591379	1012.96	50.8069	1001.51	23.2363	987.295	16.5557	98%	987.295	16.5557	Qi et al. (2018)
15CT-84-54	0.086082	3.45735	2.59901	8.88562	0.214516	0.00312513	0.46384	0.270225	1339.81	55.3959	1300.36	31.0491	1252.83	21.576	96%	1339.81	55.3959	Qi et al. (2018)
15CT-84-55	0.0852068	3.45593	2.63341	7.34028	0.222039	0.00229122	0.421521	1.22431	1320.37	50.6079	1310.02	27.6531	1292.64	18.6749	98%	1320.37	50.6079	Qi et al. (2018)
15CT-84-56	0.0858291	3.45697	2.69159	7.75231	0.225787	0.00253007	0.436343	0.803911	1400	54.3666	1326.15	28.5043	1312.38	19.6455	98%	1400	54.3666	Qi et al. (2018)
15CT-84-57	0.0772813	3.45689	1.98725	6.60366	0.185306	0.00225169	0.431699	0.405001	1127.79	58.412	1111.19	26.0414	1095.9	17.1941	98%	1127.79	58.412	Qi et al. (2018)
15CT-84-58	0.0763407	3.45725	1.90799	6.52588	0.180229	0.00202031	0.388763	0.988827	1105.56	61.1039	1083.88	25.8903	1068.23	16.13	98%	1105.56	61.1039	Qi et al. (2018)
15CT-84-59	0.17403	3.47256	11.6242	27.2846	0.480728	0.00570247	0.509603	1.12064	2598.15	56.6124	2574.62	46.6223	2530.44	37.3225	98%	2598.15	56.6124	Qi et al. (2018)
15CT-84-60	0.076943	3.45385	2.03241	5.74869	0.189423	0.00192114	0.452757	0.815963	1120.37	45.7851	1126.42	23.6179	1118.25	16.1272	99%	1120.37	45.7851	Qi et al. (2018)
15CT-84-61	0.0706855	3.45285	1.54175	4.63204	0.157028	0.00149648	0.486112	0.843235	949.995	43.4832	947.202	19.3878	940.237	13.2945	99%	940.237	13.2945	Qi et al. (2018)
15CT-84-62	0.0749498	3.45276	1.93806	5.06311	0.185681	0.00170535	0.487801	0.147586	1133.34	41.236	1094.33	21.5907	1097.94	15.2374	99%	1133.34	41.236	Qi et al. (2018)
15CT-84-63	0.0825164	3.45485	1.71326	5.37846	0.148736	0.00145873	0.412313	1.73466	1257.4	48.3654	1013.5	22.2716	893.872	12.8033	87%	893.872	12.8033	Qi et al. (2018)
15CT-84-64	0.0711154	3.45304	1.45687	4.68799	0.146579	0.00124693	0.39881	0.0723069	961.11	47.9052	912.714	19.4574	881.758	11.9772	96%	881.758	11.9772	Qi et al. (2018)
15CT-84-65	0.0681548	3.45319	1.51589	4.86793	0.159681	0.0014978	0.421565	0.707974	872.215	46.5845	936.821	20.258	955.001	13.4143	98%	955.001	13.4143	Qi et al. (2018)
15CT-84-66	0.0654305	3.45314	1.32192	4.62817	0.145342	0.00134174	0.404545	0.448975	787.04	49.7622	855.354	19.0172	874.799	12.2414	97%	874.799	12.2414	Qi et al. (2018)
15CT-84-67	0.0770228	3.45355	1.97245	5.19547	0.185429	0.00177668	0.493382	0.62143	1121.91	44.5216	1106.15	22.023	1096.56	15.4659	99%	1121.91	44.5216	Qi et al. (2018)
15CT-84-68	0.0685798	3.45253	1.32391	4.50305	0.139599	0.00179745	0.604293	0.870263	887.035	37.7959	856.221	18.4371	842.393	13.7642	98%	842.393	13.7642	Qi et al. (2018)
15CT-84-69	0.0689783	3.45245	1.59067	4.77047	0.166781	0.00167363	0.49408	0.296756	898.15	41.4601	966.558	19.9982	994.351	14.3327	97%	994.351	14.3327	Qi et al. (2018)
15CT-84-70	0.0698502	3.45371	1.92259	5.68233	0.199834	0.00193882	0.417427	0.325471	924.07	49.3351	1088.97	23.3486	1174.43	16.6074	92%	924.07	49.3351	Qi et al. (2018)
15CT-84-71	0.0756504	3.47626	2.19339	16.9809	0.201492	0.00250742	0.164289	0.79121	1087.04	114.296	1178.94	56.0995	1183.33	18.7304	99%	1087.04	114.296	Qi et al. (2018)
																		Qi et al. (2018)
Nanyan Fm, early Ediacaran, N 25°41'29", E 116°04'25"																		Qi et al. (2018)
15CT-76-01	0.07793	3.45112	2.14595	4.70876	0.20069	0.00253701	0.864265	0.57292	1146.3	28.8136	1163.75	21.2124	1179.03	18.8186	98%	1146.3	28.8136	Qi et al. (2018)
15CT-76-02	0.07204	3.45095	1.72942	4.16877	0.175154	0.00186108	0.81702	0.549427	987.04	27.2646	1019.54	18.3463	1040.45	15.3469	97%	987.04	27.2646	Qi et al. (2018)
15CT-76-03	0.0758386	3.45114	1.94813	4.64632	0.187566	0.00236827	0.807976	0.723287	1100	20.1081	1097.8	20.47	1108.17	17.7262	99%	1100	20.1081	Qi et al. (2018)
15CT-76-04	0.0798952	3.45139	2.25621	4.78234	0.206459	0.00219836	0.739611	0.410178	1194.44	30.7383	1198.72	21.7052	1209.92	17.7634	99%	1194.44	30.7383	Qi et al. (2018)
15CT-76-05	0.0805621	3.45198	2.26472	4.89106	0.206614	0.00289479	0.931535	1.24696	1210.8	33.8638	1201.38	21.9632	1210.75	20.4203	99%	1210.8	33.8638	Qi et al. (2018)
15CT-76-06	0.0770236	3.45189	1.76757	4.48079	0.16841	0.00201865	0.760691	0.614637	1121.91	34.6455	1033.63	19.453	1003.35	15.689	97%	1121.91	34.6455	Qi et al. (2018)
15CT-76-07	0.0750853	3.45162	1.69548	4.41222	0.16582	0.00202613	0.774895	0.84825	1072.22	32.6461	1006.83	19.0106	989.04	15.6258	98%	989.04	15.6258	Qi et al. (2018)
15CT-76-08	0.0663773	3.45151	1.44207	4.42059	0.160161	0.00273111	0.915062	0.373867	818.21	34.0913	906.579	18.3202	957.674	18.4806	94%	957.674	18.4806	Qi et al. (2018)
15CT-76-09	0.0750873	3.45193	1.67486	4.48042	0.163824	0.00189925	0.697298	0.232051	1072.22	35.849	999.032	19.1755	977.993	15.0559	97%	977.993	15.0559	Qi et al. (2018)
15CT-76-10	0.063045	3.45118	0.996219	3.76651	0.116004	0.00122189	0.768073	0.460422	709.27	31.7265	701.889	13.215	707.525	10.5135	99%	707.525	10.5135	Qi et al. (2018)
15CT-76-11	0.0951471	3.47844	2.35382	11.8025	0.180871	0.00264226	0.30515	0.908306	1531.49	91.4611	1228.71	39.3838	1071.73	18.6379	86%	1531.49	91.4611	Qi et al. (2018)
15CT-76-12	0.0733367	3.45115	1.69393	3.98853	0.168798	0.0015296	0.810337	0.227205	1033.34	29.8434	1006.25	17.6253	1005.48	13.9211	99%	1033.34	29.8434	Qi et al. (2018)
15CT-76-13	0.0770749	3.45131	1.80024	4.54586	0.170025	0.00213993	0.784352	1.54717	1124.08	30.6715	1045.55	19.7503	1012.25	16.2262	96%	1124.08	30.6715	Qi et al. (2018)
15CT-76-14	0.077446	3.45112	2.03701	4.50827	0.191168	0.0022974	0.865267	0.674722	1132.41	29.2755	1127.96	20.3904	1127.7	17.5736	99%	1132.41	29.2755	Qi et al. (2018)
15CT-76-15	0.0898998	3.4521	2.69615	6.32115	0.217352	0.00360251	0.850045	0.454289	1433.34	34.6147	1327.4	25.6993	1267.87	23.6411	95%	1433.34	34.6147	Qi et al. (2018)
15CT-76-16	0.0835843	3.45306	2.23703	5.99223	0.192952	0.00242803	0.57962	1.11728	1283.34	39.1515	1192.73	24.4319	1137.35	18.1396	95%	1283.34	39.1515	Qi et al. (2018)
15CT-76-17	0.0826886	3.45438	2.09634	5.75974	0.183434	0.00279637	0.699804	0.502096	1262.03	45.6085	1147.61	23.7071	1085.71	19.3649	94%	1262.03	45.6085	Qi et al. (2018)
15CT-76-18	0.0852362	3.45194	2.3291	5.41692	0.19689	0.00297883	0.854073	0.315242	1320.68	33.8036	1221.2	23.2557	1158.59	20.4993	94%	1320.68	33.8036	Qi et al. (2018)
15CT-76-19	0.152603	3.4538	8.95579	10.2394	0.42261	0.00436896	0.962523	0.184977	2375.01	42.3399	2333.51	38.6361	2272.32	31.9096	97%	2375.01	42.3399	Qi et al. (2018)
15CT-76-20	0.0773089	3.45296	1.82327	5.4064	0.169503	0.0025437	0.665395	1.47575	1129.33	41.2124	1053.86	22.4399	1009.37	17.8932	95%	1129.33	41.2124	Qi et al. (2018)
15CT-76-21	0.0798822	3.45357	1.96302	4.95117	0.177609	0.00273023	0.864147	0.505603	1194.44	43.3276	1102.92	21.3346	1053.9	18.9233	95%	1194.44	43.3276	Qi et al. (2018)
15CT-76-22	0.0751314	3.45137	1.99202	4.4476	0.190694	0.0029973	1.14627	0.205526	1072.22	27.3458	1112.81	20.0877	1125.14	20.4175	98%	1072.22	27.3458	Qi et al. (2018)
15CT-76-23	0.0811116	3.45184	2.15398	5.18055	0.190351	0.00346523	1.02912	0.179774	1233.33	32.948	1166.33	22.346	1123.28	22.4768	96%	1233.33	32.948	Qi et al. (2018)
15CT-76-24	0.0836789	3.45602	2.07735	7.0646	0.176864	0.00334313	0.640466	0.467192	1284.88	51.6478	1141.36	27.2638	1049.82	21.6569	91%	1284.88	51.6478	Qi et al. (2018)
15CT-76-25	0.0770376	3.45193	2.03487	4.7175	0.189645	0.00357058	1.2155	0.804168	1121.91	34.6476	1127.25	20.9067	1119.45	22.9423	99%	1121.91	34.6476	Qi et al. (2018)
15CT-76-26	0.0668692	3.45212	1.25857	4.05864	0.135715	0.00235202	1.07037	1.17622	835.18	41.117	827.263	16.1072	820.385	16.1202	99%	820.385	16.1202	Qi et al. (2018)
15CT-76-27	0.0817013	3.46379	2.26973	7.86689	0.202131	0.00394909	0.629852	0.934912	1238.88	76.6765	1202.93	29.1397	1186.76	24.8855	98%	1238.88	76.6765	Qi et al. (2018)
15CT-76-28	0.094892	3.45194	3.60798	6.09531	0.273522	0.00380075	1.00607	0.859508	1527.79	33.9883	1551.29	27.1616	1558.66	25.7838	99%	1527.79	33.9883	Qi et al. (2018)
15CT-76-29	0.07444	3.45139	1.78076	4.47152	0.172143	0.00224645	0.838864	1.13594	1053.71	30.9269	1038.46	19.4651	1023.91	16.7272	98%	1053.71	30.9269	Qi et al. (2018)
15CT-76-30	0.0735337	3.45143	1.78257	4.51306	0.174828	0.00244313	0.878113	0.782565	1028.7	28.4047	1039.12	19.5979	1038.66	17.6228	99%	1028.7	28.4047	Qi et al. (2018)
15CT-76-31	0.0768296	3.45278	1.97026	5.36311	0.184862	0.00243315	0.63952	0.446818	1116.66	41.1239	1105.4	22.4839	1093.48	17.8961	98%	1116.66	41.1239	Qi et al. (2018)
15CT-76-32	0.0723513	3.45168	1.77022	4.54601	0.176721	0.0022101	0.766318	1.11931	995.99	34.3236	1034.6	19.6633	1049.03	16.7353	98%	995.99	34.3236	Qi et al. (2018)
15CT-76-33	0.0741694	3.45182	1.84009	4.9366	0.179051	0.00245085	0.725582	0.850001	1055.56	34.1075	1059.89	21.0268	1061.79	17.7849	99%	1055.56	34.1075	Qi et al. (2018)
15CT-76-34	0.0714967	3.45162	1.71045	4.50839	0.172899	0.00195026	0.681893	0.764866	972.225	37.6261	1012.45	19.371	1028.07	15.5914	98%	972.225	37.6261	Qi et al. (2018)
15CT-76-35	0.0700633	3.4523	2.10508	7.43034	0.215373	0.00420873	0.628133	0.619732	931.48	39.9213	1150.47	28.2504	1257.38	26.2697	91%	931.48	39.9213	Qi et al. (2018)
15CT-76-36	0.0641905	3.45121	1.02547	4.07044	0.115174	0.00150332	0.649393	0.308153	747.84	32.6677	716.66	15.443	702.727	11.6368	98%	702.727	11.6368	Qi et al. (2018)
15CT-76-37	0.0745509	3.451	1.84299	4.37034	0.17886	0.00200634	0.793977	0.265063	1057.41	27.9279	1060.93	19.3688	1060.74	16.0264	99%	1057.41	27.9279	Qi et al. (2018)
15CT-76-38	0.0731207	3.45094	1.73401	4.16294	0.171723	0.00175708	0.792679	0.51539	1016.66	27.5419	1021.24	18.346	1021.6	14.8336	99%	1016.66	27.5419	Qi et al. (2018)
15CT-76-39	0.0755065	3.45278	1.99017	5.55255	0.190705	0.00225703	0.547461	0.193136	1083.34	35.8009	1112.18	23.0364	1125.19	17.4034	98%	1083.34	35.8009	Qi et al. (2018)
15CT-76-40	0.0697855	3.45128	1.45399	4.47624	0.1508	0.00219387	0.761478	0.713435	921.91	31.4488	911.525	18.5796	905.444	15.8261	99%	905.444	15.8261	Qi et al. (2018)
15CT-76-41	0.0785454	3.45219	2.16175	5.59021	0.199242	0.00265406	0.661843	0.972504	1161.12	36.2843	1168.83	23.3583	1171.25	19.2335	99%	1161.12	36.2843	Qi et al. (2018)
15CT-76-42	0.0691393	3.45138	1.54313	4.50398	0.161742	0.00221512	0.748798	0.470395	901.85	32.2663	947.756	18.9037	966.448	16.2595	98%	966.448	16.2595	Qi et al. (2018)
15CT-76-43	0.136091	3.45251	7.42935	10.4249	0.395248	0.00424842	0.813509	0.357433	2188.89	38.9203	2164.51	36.6248	2147.12	30.7321	99%	2188.89	38.9203	Qi et al. (2018)
15CT-76-44	0.0709062	3.45194	1.59184	4.53162	0.163208	0.00239608	0.815351	2.27456	953.7	36.6615	967.018	19.1288	974.578	17.0743	99%	974.578	17.0743	Qi et al. (2018)
15CT-76-45	0.137687	3.4523	8.36582	12.0973	0.43968	0.00526869	0.865929	0.997304	2198.46	38.3488	2271.48	38.4808	2349.21	35.0134	96%	2198.46	38.3488	Qi et al. (2018)
15CT-76-46	0.0779332	3.45117	1.99507	5.21825	0.184743	0.00271056	0.758071	0.683847	1146.3	29.6565	1113.84	22.1257	1092.83	19.0363	98%	1146.3	29.6565	Qi et al. (2018)
15CT-76-47	0.0738321	3.45082	1.86386	4.41402	0.182619	0.00226807	0.864892	0.526195	1036.73	26.2715	1068.36	19.5645	1081.27	17.1655	98%	1036.73	26.2715	Qi et al. (2018)
15CT-76-48	0.0725638	3.4515	1.66902	4.51984	0.166595	0.00230669	0.811539	0.794021	1011.11	33.7588	996.812	19.2922	993.322	16.7972	99%	993.322	16.7972	Qi et al. (2018)
15CT-76-49	0.0646148	3.45178	0.892318	3.90166	0.0999097	0.00121177	0.635211	1.08221	761.115	38.9858	647.614	13.8254	613.88	9.80545	94%	613.88	9.80545	Qi et al. (2018)
15CT-76-50	0.104004	3.45348	4.54398	9.17304	0.317242	0.00528227	0.892749	1.11151	1698.15	38.6372	1739.06	31.8835	1776.25	32.4183	97%	1698.15	38.6372	Qi et al. (2018)
15CT-76-51	0.0708676	3.45075	1.67837	4.25109	0.171406	0.00215258	0.878869	0.621973	953.7	26.3279	1000.36	18.4204	1019.85	16.3243	98%	953.7	26.3279	Qi et al. (2018)
15CT-76-52	0.0776032	3.45149	2.0876	5.89533	0.194573	0.003806	0.862131	0.711994	1136.73	31.6726	1144.74	24.0562	1146.1	24.1073	99%	1136.73	31.6726	Qi et al. (2018)
15CT-76-53	0.0765944	3.45079	2.02224	4.54532	0.191096	0.00237549	0.870479	0.879326	1110.8	23.744	1123.01	20.4347	1127.31	17.8727	99%	1110.8	23.744	Qi et al. (2018)
15CT-76-54	0.0738394	3.45113	1.77584	4.43885	0.174183	0.00208695	0.783044	0.717806	1038.89	29.2579	1036.66	19.3495	1035.12	16.1628	99%	1038.89	29.2579	Qi et al. (2018)
15CT-76-55	0.0773803	3.45097	1.864	4.70766	0.174607	0.00272135	0.926037	0.943646	1131.49	28.6653	1068.41	20.4073	1037.45	18.8044	97%	1131.49	28.6653	Qi et al. (2018)
15CT-76-56	0.0726825	3.45134	1.58373	4.43671	0.157878	0.00209914	0.775952	0.686211	1005.55	26.6915	963.836	18.7612	944.976	15.6491	98%	944.976	15.6491	Qi et al. (2018)
15CT-76-57	0.10759	3.45196	4.99368	8.92522	0.336185	0.00483039	0.87436	1.69002	1758.95	37.5441	1818.25	32.2666	1868.29	31.0879	97%	1758.95	37.5441	Qi et al. (2018)
15CT-76-58	0.0631459	3.45067	0.943941	3.81004	0.108136	0.0013356	0.786697	0.471651	722.23	25.0452	674.943	13.2948	661.911	10.654	98%	661.911	10.654	Qi et al. (2018)
15CT-76-59	0.074782	3.45077	1.75155	4.48404	0.16981	0.00263832	0.975252	0.444961	1062.66	26.5315	1027.73	19.4144	1011.06	18.3131	98%	1062.66	26.5315	Qi et al. (2018)
15CT-76-60	0.0753807	3.45119	1.91859	4.62539	0.184515	0.00259122	0.894443	1.15579	1079.63	29.627	1087.58	20.3268	1091.59	18.5309	99%	1079.63	29.627	Qi et al. (2018)
15CT-76-61	0.0786641	3.45129	2.17377	4.6852	0.200404	0.00262358	0.916994	0.6705	1164.82	30.0795	1172.69	21.243	1177.49	19.1487	99%	1164.82	30.0795	Qi et al. (2018)
15CT-76-62	0.0761085	3.45105	1.94819	4.24945	0.185336	0.00195142	0.85635	1.58951	1098.15	28.3275	1097.82	19.4204	1096.06	16.0731	99%	1098.15	28.3275	Qi et al. (2018)
15CT-76-63	0.0861412	3.45204	2.78855	5.83926	0.234711	0.00347828	0.885548	1.16237	1342.59	34.5088	1352.47	25.0109	1359.14	23.5339	99%	1342.59	34.5088	Qi et al. (2018)
15CT-76-64	0.0714758	3.4511	1.6619	4.26142	0.16838	0.00221503	0.904695	0.526184	972.225	29.3172	994.099	18.396	1003.18	16.4749	99%	972.225	29.3172	Qi et al. (2018)
15CT-76-65	0.0749023	3.45229	1.88443	5.34939	0.182165	0.00309639	0.793471	0.311264	1065.74	37.8533	1075.62	22.3306	1078.79	20.646	99%	1065.74	37.8533	Qi et al. (2018)
15CT-76-66	0.0725721	3.45119	1.73133	4.58958	0.172408	0.00234996	0.798041	1.62955	1011.11	30.5564	1020.25	19.6926	1025.36	17.1604	99%	1011.11	30.5564	Qi et al. (2018)
15CT-76-67	0.0729562	3.45119	1.76298	4.55215	0.174811	0.00243394	0.846836	0.708603	1012.96	30.5764	1031.94	19.6616	1038.56	17.584	99%	1012.96	30.5764	Qi et al. (2018)
15CT-76-68	0.0625883	3.451	0.999766	3.91144	0.115458	0.00150137	0.753198	0.18786	694.455	31.6402	703.691	14.276	704.367	11.6388	99%	704.367	11.6388	Qi et al. (2018)
15CT-76-69	0.0779282	3.45107	2.48168	5.69238	0.230672	0.00406079	0.974872	0.622296	1146.3	28.8136	1266.71	24.1312	1338.02	25.8766	94%	1146.3	28.8136	Qi et al. (2018)
15CT-76-70	0.0719818	3.45099	1.69518	4.44958	0.170595	0.00258863	0.940605	0.650479	987.04	28.7926	1006.72	19.1329	1015.39	18.1183	99%	987.04	28.7926	Qi et al. (2018)
15CT-76-71	0.0808338	3.45761	2.25657	6.70796	0.202873	0.00265512	0.516643	1.50464	1217.59	58.867	1198.84	26.1966	1190.74	19.3506	99%	1217.59	58.867	Qi et al. (2018)
																		Qi et al. (2018)
Huanglian Fm, late Ediacaran, N 25°45'38", E 116°14'18"																		Qi et al. (2018)
15CT-66-01	0.110163	3.46056	4.92762	12.471	0.322696	0.00250958	0.320232	0.613067	1802.16	52.9812	1807	35.4629	1802.88	23.3204	99%	1802.16	52.9812	Qi et al. (2018)
15CT-66-02	0.106621	3.46217	3.8551	10.9723	0.261287	0.00251279	0.35663	1.33159	1742.59	57.2484	1604.34	33.657	1496.42	20.8936	93%	1742.59	57.2484	Qi et al. (2018)
15CT-66-03	0.0949864	3.45425	3.48401	7.48759	0.264238	0.00233614	0.46572	0.272631	1527.79	41.4622	1523.6	28.6295	1511.49	20.4695	99%	1527.79	41.4622	Qi et al. (2018)
15CT-66-04	0.0668562	3.45494	1.46627	5.3756	0.158594	0.00169052	0.38388	0.625992	833.02	63.4507	916.593	22.2812	948.956	14.0606	96%	948.956	14.0606	Qi et al. (2018)
15CT-66-05	0.157008	3.46325	9.93849	21.1577	0.455146	0.00452162	0.473212	0.732212	2423.76	51.2362	2429.09	43.4553	2418.09	33.3235	99%	2423.76	51.2362	Qi et al. (2018)
15CT-66-06	0.151182	3.46381	9.13564	19.5725	0.435185	0.00410351	0.447377	0.700887	2361.11	51.4143	2351.69	42.3136	2329.05	31.5859	99%	2361.11	51.4143	Qi et al. (2018)
15CT-66-07	0.0685348	3.45669	1.56135	6.13671	0.164318	0.00203863	0.38482	0.51146	884.87	66.3408	955.002	25.1418	980.728	15.6225	97%	980.728	15.6225	Qi et al. (2018)
15CT-66-08	0.0910796	3.46733	3.06542	12.8853	0.243284	0.00342532	0.348118	0.907884	1450.01	75.8549	1424.09	38.4573	1403.75	23.5464	98%	1450.01	75.8549	Qi et al. (2018)
15CT-66-09	0.195065	3.47955	14.4466	37.7029	0.531608	0.00714666	0.517358	1.10882	2787.04	62.198	2779.5	50.8945	2748.23	42.6717	98%	2787.04	62.198	Qi et al. (2018)
15CT-66-10	0.0656769	3.47103	1.10698	7.22157	0.123287	0.00188322	0.267926	1.15242	795.99	95.2949	756.721	32.7398	749.454	13.5989	99%	749.454	13.5989	Qi et al. (2018)
15CT-66-11	0.109083	3.45743	4.85652	10.8852	0.320228	0.00295675	0.435195	0.389584	1784.26	47.1321	1794.75	33.8412	1790.84	24.4424	99%	1784.26	47.1321	Qi et al. (2018)
15CT-66-12	0.0695985	3.4537	1.54725	5.20333	0.159718	0.00177036	0.446487	1.34937	916.665	45.9226	949.398	21.578	955.207	14.4052	99%	955.207	14.4052	Qi et al. (2018)
15CT-66-13	0.0709201	3.45297	1.7631	5.10745	0.178973	0.00189654	0.503557	0.623624	955.24	39.9262	1031.99	21.425	1061.36	15.6259	97%	955.24	39.9262	Qi et al. (2018)
15CT-66-14	0.156412	3.461	9.40722	17.3684	0.431926	0.00311333	0.398631	0.682042	2416.97	48.9039	2378.53	41.5493	2314.39	29.0884	97%	2416.97	48.9039	Qi et al. (2018)
15CT-66-15	0.0809073	3.45502	1.07322	4.54852	0.0948029	0.00100268	0.39237	0.302883	1220.37	49.8162	740.32	18.4743	583.88	8.72967	76%	583.88	8.72967	Qi et al. (2018)
15CT-66-16	0.0710083	3.45636	1.56042	5.7456	0.158783	0.00172265	0.372165	0.37868	966.665	62.2883	954.634	23.646	950.01	14.1883	99%	950.01	14.1883	Qi et al. (2018)
15CT-66-17	0.0636983	3.45806	1.07965	5.40375	0.122014	0.00136916	0.294873	0.948143	731.49	80.4781	743.462	23.3273	742.147	11.3439	99%	742.147	11.3439	Qi et al. (2018)
15CT-66-18	0.0738728	3.45964	1.71224	6.92823	0.16735	0.00195874	0.335506	0.512162	1038.89	73.061	1013.12	27.628	997.496	15.4171	98%	997.496	15.4171	Qi et al. (2018)
15CT-66-19	0.0743351	3.4567	1.73401	6.02595	0.168364	0.00149258	0.313839	0.411451	1050.01	61.5954	1021.24	24.4621	1003.09	13.779	98%	1050.01	61.5954	Qi et al. (2018)
15CT-66-20	0.0818888	3.45437	2.40351	6.31273	0.210973	0.00176279	0.382749	0.653169	1242.59	21.6183	1243.65	25.3316	1234	16.5153	99%	1242.59	21.6183	Qi et al. (2018)
15CT-66-21	0.0782182	3.45566	2.02947	6.1535	0.187336	0.00177586	0.380638	0.571524	1153.71	84.4497	1125.44	24.7348	1106.93	15.5428	98%	1153.71	84.4497	Qi et al. (2018)
15CT-66-22	0.0697332	3.45395	1.47705	4.96048	0.152847	0.00150236	0.414191	0.624303	920.37	50.3515	921.022	20.5913	916.904	13.1356	99%	916.904	13.1356	Qi et al. (2018)
15CT-66-23	0.0653015	3.45763	1.1527	5.30519	0.127591	0.00134907	0.306378	1.27884	783.335	75.118	778.516	22.5281	774.111	11.4964	99%	774.111	11.4964	Qi et al. (2018)
15CT-66-24	0.155842	3.46663	9.95335	23.5394	0.459807	0.00580671	0.540021	0.86204	2410.8	53.4704	2430.47	44.5033	2438.71	37.1331	99%	2410.8	53.4704	Qi et al. (2018)
15CT-66-25	0.0667856	3.4567	1.38456	5.70995	0.149168	0.00153227	0.315793	0.509005	831.48	69.7971	882.384	23.8214	896.297	13.089	98%	896.297	13.089	Qi et al. (2018)
15CT-66-26	0.0649973	3.45311	1.44301	4.97187	0.159282	0.00166729	0.428955	0.299727	775.93	47.9283	906.97	20.6194	952.787	14.0024	95%	952.787	14.0024	Qi et al. (2018)
15CT-66-27	0.0940533	3.45535	3.67986	8.83255	0.281009	0.00278424	0.449838	0.461179	1509.26	45.5164	1567.01	30.6432	1596.44	22.4819	98%	1509.26	45.5164	Qi et al. (2018)
15CT-66-28	0.0601956	3.45248	1.28893	4.54381	0.154128	0.00134524	0.389876	0.653345	609.28	49.1147	840.823	18.5785	924.06	12.6502	90%	924.06	12.6502	Qi et al. (2018)
15CT-66-29	0.0512131	3.45634	0.623908	4.29557	0.0880011	0.00110836	0.317336	0.575429	250.065	94.5147	492.294	17.3748	543.704	8.88715	90%	543.704	8.88715	Qi et al. (2018)
15CT-66-30	0.063064	3.45535	1.10175	5.04554	0.125968	0.00175816	0.424254	0.939173	709.27	66.5546	754.196	21.2721	764.825	13.1252	98%	764.825	13.1252	Qi et al. (2018)
15CT-66-31	0.0568006	3.45239	1.10114	4.42263	0.140318	0.0016707	0.487272	0.477753	483.375	50.5897	753.901	17.7435	846.46	13.2706	88%	846.46	13.2706	Qi et al. (2018)
15CT-66-32	0.0736156	3.45423	2.64347	7.28972	0.260227	0.00215816	0.343139	0.775939	1031.48	49.8771	1312.83	27.5508	1491	19.7867	87%	1031.48	49.8771	Qi et al. (2018)
15CT-66-33	0.0535345	3.45262	1.05918	4.49551	0.143593	0.00152527	0.400548	0.0519121	350.055	55.8316	733.417	18.16	864.951	12.8323	83%	864.951	12.8323	Qi et al. (2018)
15CT-66-34	0.0649573	3.4533	1.92883	5.83515	0.215071	0.00195623	0.376368	0.659654	772.225	49.7051	1091.13	23.8012	1255.78	17.2913	85%	772.225	49.7051	Qi et al. (2018)
15CT-66-35	0.206858	3.46804	15.4957	29.1215	0.541957	0.0050649	0.500936	0.472332	2881.17	53.8221	2846.22	48.9311	2791.63	37.3312	98%	2881.17	53.8221	Qi et al. (2018)
15CT-66-36	0.0734836	3.45684	1.84359	6.25499	0.182674	0.00178499	0.347951	0.696564	1027.78	62.5455	1061.14	25.1109	1081.57	15.3801	98%	1027.78	62.5455	Qi et al. (2018)
15CT-66-38	0.0764159	3.4534	2.12632	5.98892	0.200783	0.00214363	0.467826	0.210847	1105.56	44.4145	1157.39	24.3297	1179.52	17.3547	98%	1105.56	44.4145	Qi et al. (2018)
15CT-66-39	0.0567008	3.45302	0.747487	4.03076	0.0954748	0.000988316	0.390468	0.133862	479.67	83.6752	566.765	14.6616	587.835	8.70265	96%	587.835	8.70265	Qi et al. (2018)
15CT-66-40	0.121991	3.46487	6.12063	17.8158	0.363514	0.00454453	0.438082	0.271219	1987.04	56.2863	1993.19	40.4875	1998.81	30.7607	99%	1987.04	56.2863	Qi et al. (2018)
15CT-66-41	0.0718494	3.45507	1.68357	5.944	0.169525	0.00189173	0.391643	0.515574	983.335	55.9646	1002.33	24.23	1009.49	15.2424	99%	983.335	55.9646	Qi et al. (2018)
15CT-66-42	0.076885	3.45554	2.05967	6.50047	0.193968	0.00184734	0.358524	1.01044	1118.21	54.1227	1135.51	25.6976	1142.83	16.0592	99%	1118.21	54.1227	Qi et al. (2018)
15CT-66-43	0.0690287	3.45326	1.52734	4.97993	0.160095	0.00158625	0.428381	0.514609	899.69	47.1583	941.431	20.7059	957.305	13.7423	98%	957.305	13.7423	Qi et al. (2018)
15CT-66-44	0.0692202	3.45424	1.54362	5.46159	0.160988	0.00180518	0.413654	0.421867	905.555	52.797	947.948	22.5713	962.264	14.5869	98%	962.264	14.5869	Qi et al. (2018)
15CT-66-45	0.15136	3.46035	9.62456	18.8901	0.459768	0.00492591	0.55555	0.646093	2361.42	48.3957	2399.52	42.3237	2438.53	34.5608	98%	2361.42	48.3957	Qi et al. (2018)
15CT-66-46	0.110415	3.4567	5.11993	11.2575	0.334681	0.00331479	0.474084	0.337982	1806.48	45.5347	1839.42	34.39	1861.03	26.0079	98%	1806.48	45.5347	Qi et al. (2018)
15CT-66-47	0.0708259	3.46394	1.33793	6.89594	0.137117	0.0016864	0.277218	0.485183	953.7	90.1951	862.329	29.2456	828.338	13.2145	95%	828.338	13.2145	Qi et al. (2018)
15CT-66-48	0.0706246	3.464	1.6127	7.98687	0.166354	0.00199746	0.269911	1.35225	946.29	91.9994	975.157	31.9572	991.99	15.5318	98%	991.99	15.5318	Qi et al. (2018)
15CT-66-49	0.151789	3.46592	9.77433	22.79	0.463764	0.00496779	0.464967	0.976898	2366.36	53.1787	2413.73	44.0967	2456.16	34.7904	98%	2366.36	53.1787	Qi et al. (2018)
15CT-66-50	0.147651	3.46171	8.2786	16.8338	0.403306	0.00323465	0.403292	0.292433	2320.38	49.1805	2261.98	40.4575	2184.24	28.2749	96%	2320.38	49.1805	Qi et al. (2018)
15CT-66-51	0.155887	3.46058	9.79747	18.2517	0.452318	0.00405345	0.490203	0.159508	2412.96	48.0155	2415.91	42.1968	2405.55	32.0248	99%	2412.96	48.0155	Qi et al. (2018)
15CT-66-52	0.151367	3.46068	9.454	19.1562	0.449882	0.00524063	0.584799	0.489703	2361.42	48.299	2383.09	42.3207	2394.73	35.1923	99%	2361.42	48.299	Qi et al. (2018)
15CT-66-53	0.0687838	3.45337	1.45604	4.75364	0.152712	0.00138969	0.413318	0.171502	892.28	44.0454	912.374	19.7266	916.15	12.7359	99%	916.15	12.7359	Qi et al. (2018)
15CT-66-54	0.0727695	3.45378	1.67309	5.15601	0.165668	0.00158537	0.423922	0.487771	1009.26	49.0352	998.361	21.4812	988.198	13.9755	98%	988.198	13.9755	Qi et al. (2018)
15CT-66-55	0.170234	3.46862	11.4549	25.9419	0.483672	0.00532572	0.490715	0.399024	2561.11	54.0124	2560.91	46.0548	2543.24	36.3314	99%	2561.11	54.0124	Qi et al. (2018)
15CT-66-56	0.172756	3.47226	11.5454	26.8262	0.48108	0.00511953	0.46197	0.476222	2584.26	56.1339	2568.27	46.4217	2531.97	35.6947	98%	2584.26	56.1339	Qi et al. (2018)
15CT-66-57	0.0618335	3.45313	0.850943	4.05741	0.09896	0.000984763	0.416047	0.341549	733.34	52.1058	625.166	14.9965	608.311	8.84599	97%	608.311	8.84599	Qi et al. (2018)
15CT-66-58	0.065114	3.46123	1.07303	5.82566	0.119284	0.00154456	0.298829	0.363333	788.89	89.7718	740.225	25.6743	726.44	11.9642	98%	726.44	11.9642	Qi et al. (2018)
15CT-66-59	0.0886168	3.45589	2.79867	7.15455	0.227239	0.0019234	0.379968	0.729892	1395.99	49.055	1355.18	27.3624	1320.01	17.7036	97%	1395.99	49.055	Qi et al. (2018)
15CT-66-60	0.0783486	3.45978	1.85253	6.89649	0.170617	0.00151688	0.27744	0.496181	1166.67	68.4879	1064.33	27.1487	1015.51	13.9592	95%	1166.67	68.4879	Qi et al. (2018)
15CT-66-61	0.170712	3.49471	11.1389	35.9453	0.473773	0.00693542	0.455811	0.277116	2564.5	68.3232	2534.82	50.4307	2500.09	40.9684	98%	2564.5	68.3232	Qi et al. (2018)
15CT-66-62	0.164174	3.46464	10.5981	21.2759	0.463371	0.00406179	0.442711	0.982403	2499.07	51.4706	2488.54	43.8832	2454.43	32.4167	98%	2499.07	51.4706	Qi et al. (2018)
15CT-66-63	0.0830086	3.45597	2.38897	6.83591	0.206639	0.00195015	0.384349	0.77721	1269.43	52.2563	1239.3	26.51	1210.89	16.9231	97%	1269.43	52.2563	Qi et al. (2018)
15CT-66-64	0.0645953	3.46985	1.12704	7.21471	0.12757	0.0018612	0.260866	1.26717	761.115	121.746	766.344	32.4966	773.985	13.6339	99%	773.985	13.6339	Qi et al. (2018)
15CT-66-65	0.0714849	3.45678	1.58938	6.02795	0.15946	0.00175002	0.355932	0.518528	972.225	63.0612	966.052	24.6706	953.773	14.318	98%	953.773	14.318	Qi et al. (2018)
15CT-66-66	0.0709024	3.46421	1.34579	6.84499	0.136899	0.00155201	0.259625	1.16763	953.7	92.0215	865.737	28.9698	827.104	12.6656	95%	827.104	12.6656	Qi et al. (2018)
15CT-66-67	0.165007	3.46735	10.8725	23.9783	0.471552	0.0042069	0.408927	0.526791	2509.26	53.3841	2512.28	45.0579	2490.36	33.0435	99%	2509.26	53.3841	Qi et al. (2018)
15CT-66-68	0.165549	3.46686	10.5292	22.2185	0.456262	0.00438096	0.460813	0.894181	2513.27	52.5274	2482.49	44.2026	2423.03	32.988	97%	2513.27	52.5274	Qi et al. (2018)
15CT-66-69	0.0696037	3.45624	1.45766	5.54684	0.150743	0.00158915	0.35778	0.550163	916.665	62.8502	913.041	22.9931	905.129	13.3649	99%	905.129	13.3649	Qi et al. (2018)
15CT-66-70	0.0690319	3.46338	1.22191	6.54155	0.127761	0.00158563	0.274724	0.937545	899.69	92.334	810.65	28.3707	775.077	12.4505	95%	775.077	12.4505	Qi et al. (2018)
15CT-66-71	0.0761381	3.45619	1.50907	5.45056	0.141666	0.00128337	0.327841	0.510294	1098.15	58.2673	934.063	22.5506	854.079	11.8739	91%	854.079	11.8739	Qi et al. (2018)
																		Qi et al. (2018)
Huanglian Fm, late Ediacaran, N 25°45'40", E 116°14'20"																		Qi et al. (2018)
15CT-60-01	0.0686347	3.46327	1.24031	6.50596	0.13081	0.00186974	0.323634	0.613679	887.035	91.8457	819.021	28.0793	792.484	13.7763	96%	792.484	13.7763	Qi et al. (2018)
15CT-60-02	0.0733301	3.45789	1.68489	6.4859	0.165584	0.00201264	0.37549	0.847933	1033.34	62.417	1002.83	26.1413	987.736	15.564	98%	987.736	15.564	Qi et al. (2018)
15CT-60-03	0.0704826	3.45535	1.63941	5.93814	0.167187	0.00207377	0.424554	1.26131	942.59	57.5681	985.484	24.2609	996.596	15.8635	98%	996.596	15.8635	Qi et al. (2018)
15CT-60-04	0.0753031	3.45564	1.83881	6.02637	0.176199	0.00190913	0.406716	0.68678	1075.93	50.2648	1059.44	24.3897	1046.17	15.5639	98%	1075.93	50.2648	Qi et al. (2018)
15CT-60-05	0.0782602	3.45846	1.56018	6.01314	0.143648	0.00166942	0.37137	1.35438	1153.71	59.8598	954.539	24.6705	865.26	13.3924	90%	865.26	13.3924	Qi et al. (2018)
15CT-60-06	0.217176	3.4808	17.0282	37.1414	0.564735	0.00479448	0.39098	0.752393	2961.11	58.4685	2936.42	51.4301	2886.17	37.4234	98%	2961.11	58.4685	Qi et al. (2018)
15CT-60-07	0.0704388	3.45504	1.55067	5.45427	0.158914	0.0015424	0.36051	0.473924	942.59	55.7824	950.76	22.5395	950.74	13.5368	99%	950.74	13.5368	Qi et al. (2018)
15CT-60-08	0.206805	3.48842	15.8044	40.8647	0.551347	0.00576922	0.406191	0.576486	2880.55	61.312	2865.05	52.0612	2830.77	39.3276	98%	2880.55	61.312	Qi et al. (2018)
15CT-60-09	0.0835054	3.45657	2.29037	6.84184	0.197784	0.0016166	0.318763	1.21596	1281.17	54.0389	1209.32	26.5239	1163.4	15.4876	96%	1281.17	54.0389	Qi et al. (2018)
15CT-60-10	0.0703843	3.45759	1.59471	6.46236	0.1635	0.00171201	0.307741	0.729539	938.885	68.3415	968.141	26.2916	976.2	14.3374	99%	976.2	14.3374	Qi et al. (2018)
15CT-60-11	0.0768196	3.45633	1.97821	6.56054	0.186354	0.00194735	0.372961	1.04475	1116.66	57.3277	1108.11	25.923	1101.59	16.0983	99%	1116.66	57.3277	Qi et al. (2018)
15CT-60-12	0.0713943	3.45401	1.51778	5.06666	0.153608	0.00149182	0.403419	0.393363	968.515	50.5798	937.582	21.0377	921.156	13.1307	98%	921.156	13.1307	Qi et al. (2018)
15CT-60-13	0.0750701	3.45321	1.90959	5.28357	0.18355	0.00155777	0.410375	0.599204	1072.22	42.5036	1084.44	22.1707	1086.34	14.6673	99%	1072.22	42.5036	Qi et al. (2018)
15CT-60-14	0.121771	3.45924	5.94283	13.6776	0.352038	0.00340019	0.4342	0.540418	1983.34	48.7709	1967.52	36.9673	1944.32	26.858	98%	1983.34	48.7709	Qi et al. (2018)
15CT-60-15	0.0767338	3.45461	1.99638	5.92062	0.188108	0.00183065	0.40748	0.211682	1114.5	22.6034	1114.29	24.0726	1111.12	15.7608	99%	1114.5	22.6034	Qi et al. (2018)
15CT-60-16	0.0716828	3.45596	1.65511	6.11986	0.166445	0.00199667	0.396045	0.671268	976.855	60.5423	991.509	24.8935	992.494	15.532	99%	992.494	15.532	Qi et al. (2018)
15CT-60-17	0.0819778	3.4622	2.27974	9.12585	0.201111	0.00249589	0.335865	1.31292	1255.55	76.8955	1206.04	32.4527	1181.29	18.6734	97%	1255.55	76.8955	Qi et al. (2018)
15CT-60-18	0.0804726	3.46364	1.9665	7.92837	0.177416	0.00213611	0.333051	1.14684	1209.26	78.3491	1104.11	30.079	1052.85	16.4691	95%	1209.26	78.3491	Qi et al. (2018)
15CT-60-19	0.136436	3.46016	7.1234	15.4943	0.376522	0.00369048	0.462644	0.28774	2183.34	48.2862	2126.97	38.9368	2060.02	28.5205	96%	2183.34	48.2862	Qi et al. (2018)
15CT-60-20	0.0695066	3.45632	1.44816	5.65677	0.150584	0.0014213	0.308122	0.871172	922.22	64.6733	909.111	23.4623	904.236	12.7509	99%	904.236	12.7509	Qi et al. (2018)
15CT-60-21	0.0799163	3.45434	2.39114	6.43375	0.216127	0.00201826	0.41412	0.747155	1194.44	47.6664	1239.95	25.5921	1261.38	17.5339	98%	1194.44	47.6664	Qi et al. (2018)
15CT-60-22	0.0700257	3.46189	1.65495	7.51049	0.169354	0.00236732	0.348409	1.38501	929.32	85.4093	991.447	29.949	1008.55	17.1374	98%	929.32	85.4093	Qi et al. (2018)
15CT-60-23	0.0679593	3.45393	1.48535	5.14945	0.157884	0.00171785	0.428927	1.1502	877.775	51.935	924.419	21.3569	945.006	14.1346	97%	945.006	14.1346	Qi et al. (2018)
15CT-60-24	0.0767288	3.45813	1.71243	6.49041	0.160882	0.00144254	0.281245	1.01561	1113.88	64.6933	1013.19	26.095	961.676	13.2793	94%	961.676	13.2793	Qi et al. (2018)
15CT-60-25	0.0717233	3.46146	1.60282	7.17504	0.162308	0.0019899	0.314013	0.858625	988.89	82.2463	971.31	28.9471	969.59	15.3567	99%	969.59	15.3567	Qi et al. (2018)
15CT-60-26	0.0724006	3.45466	1.7979	5.94559	0.17908	0.00205982	0.430925	0.7309	998.15	56.9213	1044.7	24.1498	1061.94	16.2361	98%	998.15	56.9213	Qi et al. (2018)
15CT-60-27	0.109431	3.4608	5.01882	14.0616	0.330504	0.00372732	0.41568	1.42025	1790.74	54.0556	1822.5	37.1418	1840.82	27.1505	98%	1790.74	54.0556	Qi et al. (2018)
15CT-60-28	0.0716099	3.46123	1.58176	7.20353	0.160587	0.00180542	0.282698	0.779193	975.93	81.149	963.062	29.1537	960.036	14.5724	99%	960.036	14.5724	Qi et al. (2018)
15CT-60-29	0.0685949	3.45572	1.36659	5.37376	0.144142	0.0016573	0.38615	0.554852	887.035	61.9866	874.703	22.3833	868.042	13.3636	99%	868.042	13.3636	Qi et al. (2018)
15CT-60-30	0.0729956	3.45639	1.62115	5.90861	0.160927	0.00184402	0.39083	1.25731	1012.96	61.4388	978.435	24.1772	961.924	14.7336	98%	961.924	14.7336	Qi et al. (2018)
15CT-60-31	0.0758513	3.45411	1.80951	5.41429	0.172255	0.00161505	0.41155	0.756914	1100	47.8029	1048.9	22.4529	1024.52	14.3594	97%	1100	47.8029	Qi et al. (2018)
15CT-60-32	0.0805525	3.45588	2.52311	7.34499	0.226533	0.00233301	0.40274	1.60967	1210.8	52.6093	1278.72	27.6609	1316.3	18.987	97%	1210.8	52.6093	Qi et al. (2018)
15CT-60-33	0.0760475	3.45336	2.17004	6.26598	0.204938	0.00257912	0.526137	0.15021	1098.15	43.0968	1171.49	25.0676	1201.79	19.12	97%	1098.15	43.0968	Qi et al. (2018)
15CT-60-34	0.0711045	3.45416	1.79189	5.59155	0.181682	0.00163807	0.371177	0.339732	961.11	51.5759	1042.51	23.007	1076.16	14.8433	96%	961.11	51.5759	Qi et al. (2018)
15CT-60-35	0.0654956	3.45348	1.40904	4.97184	0.154619	0.00145952	0.377726	0.540482	790.74	51.571	892.754	20.6077	926.802	13.0609	96%	926.802	13.0609	Qi et al. (2018)
15CT-60-36	0.0744937	3.4601	1.81523	7.14251	0.177372	0.00197953	0.325671	0.755365	1054.63	72.3649	1050.97	28.0472	1052.6	15.8701	99%	1054.63	72.3649	Qi et al. (2018)
15CT-60-37	0.0664305	3.45386	1.45794	5.15505	0.157642	0.00163525	0.40057	0.474092	820.37	53.4832	913.159	21.3802	943.661	13.8177	96%	943.661	13.8177	Qi et al. (2018)
15CT-60-38	0.0638265	3.45354	1.39485	4.94861	0.15697	0.00152845	0.389351	0.389073	744.45	53.1981	886.756	20.504	939.919	13.4045	94%	939.919	13.4045	Qi et al. (2018)
15CT-60-39	0.0699974	3.4568	1.56425	5.79482	0.160955	0.00134416	0.283316	0.492645	927.775	64.6912	956.153	23.8288	962.084	12.9605	99%	962.084	12.9605	Qi et al. (2018)
15CT-60-40	0.0928846	3.45989	3.63964	10.9602	0.282014	0.00347332	0.431731	1.037	1487.04	58.7394	1558.25	33.7499	1601.5	24.8217	97%	1487.04	58.7394	Qi et al. (2018)
15CT-60-41	0.0731173	3.45514	2.05412	6.46468	0.201749	0.00217886	0.408638	0.985177	1016.66	85.8183	1133.67	25.6001	1184.71	17.5169	95%	1016.66	85.8183	Qi et al. (2018)
15CT-60-42	0.0714344	3.45351	1.84368	5.31611	0.185706	0.00174907	0.434919	0.637915	970.06	47.0772	1061.18	22.182	1098.07	15.3843	96%	970.06	47.0772	Qi et al. (2018)
15CT-60-43	0.0799537	3.45638	2.51162	7.41569	0.226741	0.00247532	0.419741	3.19823	1195.99	59.6289	1275.4	27.8199	1317.4	19.486	96%	1195.99	59.6289	Qi et al. (2018)
15CT-60-44	0.0684137	3.45342	1.45686	4.79582	0.153001	0.00109732	0.319725	0.657537	881.17	48.3966	912.71	19.9012	917.765	11.8238	99%	917.765	11.8238	Qi et al. (2018)
15CT-60-45	0.0709465	3.45505	1.68222	5.76492	0.170571	0.00182491	0.393548	0.504925	966.665	55.8878	1001.82	23.6033	1015.26	15.034	98%	966.665	55.8878	Qi et al. (2018)
15CT-60-46	0.0752589	3.45932	1.90863	7.28183	0.183797	0.00216902	0.35304	1.37194	1075.93	70.6519	1084.11	28.2395	1087.68	16.8228	99%	1075.93	70.6519	Qi et al. (2018)
15CT-60-47	0.0875453	3.46297	2.70722	9.83139	0.224004	0.0024432	0.321529	1.01805	1372.22	69.1648	1330.44	32.964	1303	19.2744	97%	1372.22	69.1648	Qi et al. (2018)
15CT-60-48	0.0625353	3.45471	1.00179	4.65038	0.115218	0.00134111	0.382248	0.0245478	692.29	62.1008	704.72	19.152	702.978	10.9561	99%	702.978	10.9561	Qi et al. (2018)
15CT-60-49	0.0757318	3.45674	1.96653	6.81108	0.187241	0.0021453	0.38601	1.11057	1087.96	58.956	1104.12	26.6797	1106.41	16.8572	99%	1087.96	58.956	Qi et al. (2018)
15CT-60-50	0.085572	3.46047	2.68552	9.5088	0.225573	0.00251175	0.338375	1.93718	1328.7	64.4167	1324.48	32.2906	1311.26	19.5728	98%	1328.7	64.4167	Qi et al. (2018)
15CT-60-51	0.0718401	3.45411	1.67922	5.32398	0.168351	0.00151394	0.377231	0.830701	981.17	49.9107	1000.69	22.0675	1003.02	13.8493	99%	981.17	49.9107	Qi et al. (2018)
15CT-60-52	0.158718	3.46516	10.416	22.7955	0.471801	0.00452762	0.443787	0.718617	2442.28	52.17	2472.47	44.3748	2491.45	33.8549	99%	2442.28	52.17	Qi et al. (2018)
15CT-60-53	0.0803758	3.45463	2.33398	6.43784	0.20902	0.00203012	0.420042	1.10354	1206.48	48.4515	1222.69	25.5648	1223.59	17.2848	99%	1206.48	48.4515	Qi et al. (2018)
15CT-60-54	0.0752028	3.45446	1.88562	5.95933	0.179576	0.0016401	0.357596	0.90277	1073.77	49.3824	1076.04	24.1687	1064.66	14.7588	98%	1073.77	49.3824	Qi et al. (2018)
15CT-60-55	0.0582914	3.45293	0.892881	4.16247	0.110162	0.000972094	0.352145	0.251979	538.925	54.383	647.916	15.8654	673.69	9.32265	96%	673.69	9.32265	Qi et al. (2018)
15CT-60-56	0.0707093	3.4536	1.58651	4.92281	0.162038	0.0016407	0.465401	0.369946	949.995	48.7288	964.927	20.5522	968.091	14.0185	99%	968.091	14.0185	Qi et al. (2018)
15CT-60-57	0.0756848	3.45226	1.96071	4.86621	0.186065	0.00158564	0.495753	0.603434	1087.04	37.5951	1102.13	21.0982	1100.02	14.8675	99%	1087.04	37.5951	Qi et al. (2018)
15CT-60-58	0.0994691	3.45549	2.83143	6.77058	0.204208	0.00152101	0.364257	0.299648	1613.88	44.6432	1363.9	26.6927	1197.89	15.503	87%	1613.88	44.6432	Qi et al. (2018)
15CT-60-59	0.158507	3.45941	8.99091	14.7417	0.407457	0.00278711	0.429537	0.9805	2439.81	51.0325	2337.08	40.1562	2203.29	27.4183	94%	2439.81	51.0325	Qi et al. (2018)
15CT-60-60	0.0928883	3.45317	3.3949	7.2764	0.26238	0.00312171	0.633706	0.50489	1487.04	38.8464	1503.22	28.2201	1502.01	22.973	99%	1487.04	38.8464	Qi et al. (2018)
15CT-60-61	0.0734933	3.45352	1.81116	5.17843	0.177506	0.00168805	0.452378	0.323004	1027.78	46.3759	1049.5	21.7163	1053.33	14.8317	99%	1027.78	46.3759	Qi et al. (2018)
15CT-60-62	0.0700108	3.45816	1.55566	6.19618	0.160604	0.00186937	0.354618	0.473757	927.775	71.9235	952.743	25.3843	960.133	14.8197	99%	960.133	14.8197	Qi et al. (2018)
15CT-60-63	0.0725179	3.45312	1.74662	5.03584	0.173239	0.00180128	0.502926	0.129251	1011.11	44.8447	1025.91	21.1692	1029.93	15.0538	99%	1011.11	44.8447	Qi et al. (2018)
15CT-60-64	0.0701961	3.45351	1.51567	4.90712	0.155597	0.0017528	0.497892	0.376018	1000	53.3817	936.73	20.4112	932.262	14.1782	99%	932.262	14.1782	Qi et al. (2018)
15CT-60-65	0.0837461	3.45339	2.16662	5.25494	0.186556	0.00175688	0.521736	0.469682	1287.04	41.036	1170.4	22.5513	1102.69	15.4462	94%	1287.04	41.036	Qi et al. (2018)
15CT-60-66	0.0714862	3.45289	1.58312	4.64788	0.159654	0.00129746	0.422272	0.282237	972.225	43.6088	963.596	19.5336	954.853	12.7517	99%	954.853	12.7517	Qi et al. (2018)
15CT-60-67	0.0753727	3.45216	2.0152	4.94047	0.192228	0.00151649	0.457258	0.473592	1079.63	32.577	1120.64	21.428	1133.43	14.935	98%	1079.63	32.577	Qi et al. (2018)
15CT-60-69	0.0940597	3.45427	3.3843	7.57102	0.258753	0.0021342	0.416111	0.869582	1509.26	41.538	1500.77	28.6181	1483.46	19.6566	98%	1509.26	41.538	Qi et al. (2018)
15CT-60-70	0.0675274	3.4535	1.48254	4.91465	0.158882	0.0016898	0.45836	0.259196	853.7	50.0475	923.272	20.4103	950.563	14.0695	97%	950.563	14.0695	Qi et al. (2018)
15CT-60-71	0.0711475	3.45301	1.67561	5.09336	0.169739	0.00178691	0.47794	0.97655	961.11	47.9052	999.319	21.2672	1010.67	14.8617	98%	961.11	47.9052	Qi et al. (2018)
15CT-60-72	0.0936566	3.45827	2.77063	15.1191	0.204533	0.00594486	0.547599	0.779344	1501.85	53.8108	1347.66	45.1004	1199.63	34.4498	88%	1501.85	53.8108	Qi et al. (2018)
15CT-60-74	0.0735946	3.45326	1.7724	5.17082	0.17351	0.00160159	0.430867	0.779739	1031.48	44.961	1035.4	21.6409	1031.42	14.3679	99%	1031.48	44.961	Qi et al. (2018)
15CT-60-75	0.0743122	3.4528	1.86784	5.13443	0.180807	0.00154114	0.424864	0.128733	1050.01	40.6719	1069.77	21.6685	1071.38	14.4919	99%	1050.01	40.6719	Qi et al. (2018)
15CT-60-76	0.0835326	3.45298	2.73053	6.27355	0.235321	0.0024456	0.545746	0.542121	1283.34	39.1515	1336.8	25.6634	1362.33	19.6973	98%	1283.34	39.1515	Qi et al. (2018)
15CT-60-77	0.0729672	3.45258	1.72134	4.93278	0.169943	0.00186969	0.546414	0.423153	1012.96	40.4284	1016.53	20.7904	1011.8	15.1757	99%	1012.96	40.4284	Qi et al. (2018)
15CT-60-78	0.0756517	3.45271	2.0248	5.31042	0.192298	0.00183894	0.485896	1.09948	1087.04	39.9385	1123.87	22.4251	1133.81	15.9618	99%	1087.04	39.9385	Qi et al. (2018)
15CT-60-79	0.12741	3.45724	6.66179	12.7544	0.3761	0.00357273	0.516096	0.421292	2062.65	45.7175	2067.57	36.8836	2058.04	28.1753	99%	2062.65	45.7175	Qi et al. (2018)
15CT-60-80	0.18467	3.47129	12.9873	28.212	0.509237	0.00475768	0.433458	0.449029	2695.37	55.0781	2678.73	47.468	2653.37	35.5936	99%	2695.37	55.0781	Qi et al. (2018)
15CT-60-81	0.0700678	3.45313	1.63318	4.92705	0.168414	0.00100946	0.283109	1.00388	931.48	45.1271	983.086	20.631	1003.37	12.3745	97%	931.48	45.1271	Qi et al. (2018)
15CT-60-82	0.0736496	3.45216	1.87337	4.77978	0.183691	0.00109504	0.344214	0.543426	1031.48	37.1967	1071.72	20.6402	1087.11	13.3756	98%	1031.48	37.1967	Qi et al. (2018)
15CT-60-83	0.0694939	3.45192	1.66446	4.583	0.172863	0.000967482	0.316125	0.631471	922.22	36.4502	995.077	19.495	1027.87	12.5069	96%	922.22	36.4502	Qi et al. (2018)
15CT-60-84	0.0689931	3.45312	1.57452	4.91673	0.165205	0.00118144	0.327041	0.885202	898.15	46.7105	960.208	20.5146	985.636	12.671	97%	985.636	12.671	Qi et al. (2018)
15CT-60-85	0.0637375	3.4551	1.02745	4.63313	0.116795	0.000957496	0.278524	0.862986	731.49	32.7175	717.652	19.0126	712.09	9.59428	99%	712.09	9.59428	Qi et al. (2018)
15CT-60-86	0.0758542	3.46464	1.89238	9.15212	0.179938	0.00119808	0.149072	0.295298	1100	85.6258	1078.42	34.3322	1066.64	13.4477	98%	1100	85.6258	Qi et al. (2018)
15CT-60-87	0.178395	3.47095	12.8571	29.7963	0.520879	0.00376393	0.313994	0.697798	2637.97	55.1486	2669.24	47.9304	2702.91	33.7735	98%	2637.97	55.1486	Qi et al. (2018)
15CT-60-88	0.0671711	3.45477	1.49013	5.55012	0.160625	0.00144918	0.312708	0.723023	842.59	57.1674	926.371	22.9656	960.247	13.2902	96%	960.247	13.2902	Qi et al. (2018)
15CT-60-89	0.0662039	3.45476	1.47762	5.50912	0.161626	0.00140783	0.30311	0.350455	812.96	63.3816	921.254	22.8142	965.806	13.1976	95%	965.806	13.1976	Qi et al. (2018)
15CT-60-90	0.0698765	3.45298	1.64851	5.06715	0.170199	0.00108613	0.287858	0.529314	924.07	44.0645	988.98	21.1458	1013.21	12.6616	97%	924.07	44.0645	Qi et al. (2018)
15CT-60-91	0.0757324	3.45319	1.8413	5.1145	0.175733	0.00120296	0.338832	0.0607765	1087.96	42.6081	1060.33	21.5653	1043.62	13.2517	98%	1087.96	42.6081	Qi et al. (2018)
15CT-60-92	0.0796652	3.45334	2.36577	5.8213	0.214288	0.00133168	0.316574	0.733064	1188.58	42.3165	1232.33	24.2024	1251.62	15.4916	98%	1188.58	42.3165	Qi et al. (2018)
15CT-60-93	0.143068	3.45806	8.74914	15.2952	0.440848	0.00276969	0.369232	0.457656	2264.51	46.512	2312.21	40.1439	2354.43	28.7388	98%	2264.51	46.512	Qi et al. (2018)
15CT-60-94	0.0765374	3.45417	1.89669	5.47739	0.178773	0.0012412	0.313164	0.520191	1109.26	47.8577	1079.93	22.7235	1060.27	13.5065	98%	1109.26	47.8577	Qi et al. (2018)
15CT-60-95	0.0700568	3.45322	1.76736	5.21146	0.181595	0.0015055	0.380363	0.384498	931.48	45.1271	1033.55	21.7655	1075.68	14.4155	96%	931.48	45.1271	Qi et al. (2018)
15CT-60-96	0.0854892	3.45732	2.07575	6.20081	0.17568	0.00133635	0.308891	0.598507	1327.78	54.7544	1140.83	24.8708	1043.33	13.628	91%	1327.78	54.7544	Qi et al. (2018)
15CT-60-97	0.073412	3.45305	1.91984	5.07324	0.188148	0.00134183	0.373787	0.624758	1025.61	43.2074	1088.01	21.5837	1111.34	14.241	97%	1025.61	43.2074	Qi et al. (2018)
15CT-60-98	0.0765123	3.45298	2.02255	5.03025	0.190128	0.00127989	0.377861	0.302808	1109.26	41.0703	1123.12	21.6799	1122.07	14.1694	99%	1109.26	41.0703	Qi et al. (2018)
15CT-60-99	0.0856117	3.45725	2.33989	6.91561	0.197372	0.00190035	0.37809	0.518098	1329.32	58.6243	1224.49	26.6964	1161.19	16.3774	94%	1329.32	58.6243	Qi et al. (2018)
15CT-60-100	0.088347	3.45492	2.83457	6.60796	0.231627	0.00178587	0.390359	0.797678	1390.74	45.4781	1364.73	26.4092	1343.02	17.497	98%	1390.74	45.4781	Qi et al. (2018)
15CT-60-101	0.0936016	3.45315	3.23053	6.28148	0.248127	0.0017356	0.43378	0.144718	1501.85	38.153	1464.51	26.5779	1428.81	18.11	97%	1501.85	38.153	Qi et al. (2018)
15CT-60-102	0.0716128	3.4538	1.57666	4.89872	0.158803	0.00108232	0.314459	0.446636	975.93	48.8598	961.053	20.4503	950.123	12.0725	98%	950.123	12.0725	Qi et al. (2018)
15CT-60-103	0.0775834	3.45319	1.9968	5.17869	0.185184	0.00118548	0.335707	0.470991	1136.12	41.9527	1114.43	22.0218	1095.23	13.6773	98%	1136.12	41.9527	Qi et al. (2018)
15CT-60-104	0.0904538	3.45342	3.09051	6.2735	0.245782	0.00144173	0.348648	0.183124	1435.19	69.4912	1430.34	26.2923	1416.69	17.2942	99%	1435.19	69.4912	Qi et al. (2018)
15CT-60-105	0.113409	3.46188	3.12283	8.3651	0.198805	0.00146132	0.302308	0.657472	1854.63	54.0828	1438.33	29.6694	1168.9	15.0822	79%	1854.63	54.0828	Qi et al. (2018)
15CT-60-106	0.103921	3.45884	3.8363	9.40699	0.266647	0.0021375	0.35236	0.419526	1695.37	51.6747	1600.4	31.506	1523.76	19.999	95%	1695.37	51.6747	Qi et al. (2018)
15CT-60-107	0.146721	3.46138	8.3119	16.0844	0.408224	0.00307537	0.398921	0.393543	2309.26	49.0464	2265.62	40.1171	2206.8	28.087	97%	2309.26	49.0464	Qi et al. (2018)
15CT-60-108	0.077766	3.45375	1.96697	5.22137	0.183526	0.00219483	0.608538	0.60387	1142.6	45.9255	1104.27	22.0849	1086.21	16.9122	98%	1142.6	45.9255	Qi et al. (2018)
15CT-60-109	0.0923373	3.45879	2.21296	6.97592	0.173038	0.00137441	0.291567	1.12113	1475.93	51.1478	1185.15	26.8923	1028.83	13.6174	85%	1475.93	51.1478	Qi et al. (2018)
15CT-60-110	0.077765	3.45313	2.07587	5.27892	0.19284	0.00146259	0.399306	0.265585	1142.6	46.7778	1140.87	22.4328	1136.74	14.8056	99%	1142.6	46.7778	Qi et al. (2018)
15CT-60-111	0.0713178	3.4546	1.62503	5.34903	0.165009	0.00140259	0.342215	1.09535	966.35	53.3712	979.939	22.1368	984.551	13.3344	99%	984.551	13.3344	Qi et al. (2018)
15CT-60-112	0.0787806	3.45381	1.85439	5.20216	0.1703	0.00133146	0.377601	0.46168	1166.36	45.0928	1064.99	21.8503	1013.76	13.3582	95%	1166.36	45.0928	Qi et al. (2018)
15CT-60-113	0.0938115	3.45342	3.17215	7.07006	0.244366	0.00275836	0.583433	0.231695	1505.56	43.0255	1450.4	27.6153	1409.35	21.0977	97%	1505.56	43.0255	Qi et al. (2018)
15CT-60-114	0.0746919	3.45225	1.97401	5.06659	0.191572	0.00213921	0.60329	0.577238	1061.12	37.4095	1106.68	21.673	1129.89	16.9937	97%	1061.12	37.4095	Qi et al. (2018)
15CT-60-115	0.213013	3.62973	9.68222	74.3289	0.297107	0.00588514	0.258313	0.542053	2928.7	98.1704	2405.02	80.3991	1676.95	34.5912	64%	2928.7	98.1704	Qi et al. (2018)
15CT-60-116	0.15152	3.5117	4.53591	25.1175	0.20742	0.00241584	0.212417	0.853766	2364.82	82.8986	1737.58	53.435	1215.06	18.5858	64%	2364.82	82.8986	Qi et al. (2018)
15CT-60-117	0.0769861	3.46055	1.84818	7.25151	0.174614	0.00183084	0.305392	1.01548	1120.37	72.6149	1062.78	28.3092	1037.48	15.2156	97%	1120.37	72.6149	Qi et al. (2018)
15CT-60-118	0.06916	3.45716	1.41951	5.74837	0.149159	0.00166225	0.347498	0.523109	903.39	68.2164	897.158	23.9041	896.247	13.5786	99%	896.247	13.5786	Qi et al. (2018)
15CT-60-119	0.0940481	3.45424	3.19509	6.45714	0.245891	0.00168083	0.402975	0.658293	1509.26	41.2882	1455.97	26.7535	1417.25	17.8679	97%	1509.26	41.2882	Qi et al. (2018)
15CT-60-120	0.0725453	3.45232	1.67155	4.5263	0.166229	0.00111602	0.392687	0.0983821	1011.11	39.1513	997.776	19.3211	991.299	12.5397	99%	991.299	12.5397	Qi et al. (2018)
																		Qi et al. (2018)
Xixi Fm, Cryogenian, N 25°59'59", E 116°23'39"																		Qi et al. (2018)
17PM02-4-01	0.161756	3.46323	10.3636	19.9637	0.465198	0.00568686	0.644652	1.19449	2475.92	50.6011	2467.81	43.2463	2462.47	36.8986	99%	2475.92	50.6011	Qi et al. (2018)
17PM02-4-02	0.243305	5.59902	5.97036	98.845	0.138429	0.00505718	0.220801	1.10609	3141.68	296.268	1971.54	147.321	835.774	30.0795	19%	835.774	30.0795	Qi et al. (2018)
17PM02-4-03	0.0778731	3.45283	2.06208	5.25464	0.191155	0.00210482	0.580649	1.79219	1143.53	43.8177	1136.31	22.3446	1127.63	16.8518	99%	1143.53	43.8177	Qi et al. (2018)
17PM02-4-04	0.0777498	3.45298	2.01269	5.11891	0.188161	0.00267446	0.767784	0.251466	1140.44	41.015	1119.8	21.8928	1111.41	18.9835	99%	1140.44	41.015	Qi et al. (2018)
17PM02-4-05	0.073706	3.45367	1.79179	5.24832	0.175966	0.00220112	0.574415	3.58017	1035.19	45.702	1042.48	21.9113	1044.9	16.6739	99%	1035.19	45.702	Qi et al. (2018)
17PM02-4-06	0.0822258	3.45552	2.25195	6.67811	0.19433	0.0023622	0.481823	1.88556	1250.92	51.434	1197.4	26.1225	1144.79	17.931	95%	1250.92	51.434	Qi et al. (2018)
17PM02-4-07	0.0769672	3.45375	2.03671	5.71652	0.191004	0.0025057	0.592164	0.603777	1120.37	44.5117	1127.86	23.5341	1126.81	18.3832	99%	1120.37	44.5117	Qi et al. (2018)
17PM02-4-08	0.0692249	3.45368	1.44868	4.77936	0.151489	0.00182214	0.537183	1.10079	905.555	50.2827	909.327	19.8239	909.305	14.295	99%	909.305	14.295	Qi et al. (2018)
17PM02-4-09	0.0736969	3.45978	1.63897	6.62766	0.16198	0.00287704	0.517812	0.720223	1033.03	72.7354	985.316	26.7748	967.771	19.1927	98%	967.771	19.1927	Qi et al. (2018)
17PM02-4-10	0.110413	3.46056	4.86835	12.304	0.320424	0.00431872	0.556415	1.49537	1806.48	53.2769	1796.8	35.275	1791.8	28.8784	99%	1806.48	53.2769	Qi et al. (2018)
17PM02-4-11	0.167561	3.465	11.1722	22.255	0.482873	0.00605034	0.636986	1.79298	2600	52.2622	2537.6	44.5819	2539.77	38.3952	99%	2600	52.2622	Qi et al. (2018)
17PM02-4-12	0.0744387	3.45701	1.70618	6.1091	0.16726	0.00236728	0.482953	1.63382	1053.71	66.077	1010.85	24.7796	996.997	17.073	98%	996.997	17.073	Qi et al. (2018)
17PM02-4-13	0.0790656	3.45437	2.10597	5.85099	0.193735	0.00260015	0.603784	1.40619	1173.77	46.5446	1150.76	23.9545	1141.58	18.8475	99%	1173.77	46.5446	Qi et al. (2018)
17PM02-4-14	0.0715011	3.45447	1.69466	5.29373	0.168937	0.00225901	0.571844	2.16043	972.225	52.3639	1006.52	21.9725	1006.25	16.6737	99%	972.225	52.3639	Qi et al. (2018)
17PM02-4-15	0.0723359	3.45384	1.75878	5.26389	0.176975	0.00230024	0.582742	0.852586	995.37	47.9449	1030.4	21.926	1050.43	17.1043	98%	995.37	47.9449	Qi et al. (2018)
17PM02-4-16	0.0647636	3.45971	0.998012	5.14871	0.112573	0.00203618	0.479224	0.741742	766.36	86.0555	702.8	22.2065	687.676	14.0196	97%	687.676	14.0196	Qi et al. (2018)
17PM02-4-17	0.0707116	3.45657	1.57391	5.99453	0.162217	0.0022383	0.446903	0.503119	949.995	62.9744	959.969	24.573	969.087	16.372	99%	969.087	16.372	Qi et al. (2018)
17PM02-4-18	0.0830454	3.45381	2.45845	6.2049	0.215069	0.00271783	0.607179	0.880248	1270.05	43.879	1259.91	25.155	1255.76	19.9795	99%	1270.05	43.879	Qi et al. (2018)
17PM02-4-19	0.0791963	3.45477	2.05793	6.1536	0.188597	0.00265921	0.574091	1.41854	1176.86	48.9745	1134.93	24.7389	1113.77	18.9332	98%	1176.86	48.9745	Qi et al. (2018)
17PM02-4-20	0.0728187	3.45332	1.69932	4.91595	0.169977	0.00200483	0.582328	1.15924	1009.26	44.8364	1008.28	20.6966	1011.99	15.692	99%	1009.26	44.8364	Qi et al. (2018)
17PM02-4-21	0.111347	3.45644	5.05224	10.5496	0.33015	0.00423941	0.652103	1.92495	1821.3	44.859	1828.12	33.7	1839.11	28.851	99%	1821.3	44.859	Qi et al. (2018)
17PM02-4-22	0.0668365	3.45769	1.01295	4.78513	0.110907	0.00143856	0.40399	1.06455	831.48	72.678	710.365	19.9638	678.011	11.2001	95%	678.011	11.2001	Qi et al. (2018)
17PM02-4-23	0.077781	3.45524	1.94479	5.98471	0.181756	0.00225436	0.497627	1.59312	1142.6	52.8032	1096.65	24.2443	1076.56	17.0822	98%	1142.6	52.8032	Qi et al. (2018)
17PM02-4-24	0.0942983	3.45626	3.40873	8.50944	0.262745	0.00325064	0.544031	1.01476	1513.88	48.0625	1506.41	30.012	1503.87	23.4458	99%	1513.88	48.0625	Qi et al. (2018)
17PM02-4-25	0.083304	3.45508	1.82917	5.54285	0.159102	0.00181984	0.487713	0.897085	1275.92	48.9093	1055.98	22.8698	951.786	14.571	89%	951.786	14.571	Qi et al. (2018)
17PM02-4-26	0.0717603	3.4541	1.6466	5.22338	0.167304	0.0021995	0.559614	1.25984	988.89	50.6806	988.248	21.6961	997.238	16.3757	99%	997.238	16.3757	Qi et al. (2018)
17PM02-4-27	0.0722276	3.45296	1.63785	4.82679	0.164529	0.00188102	0.565156	0.971379	992.28	43.01	984.885	20.2836	981.897	15.0121	99%	981.897	15.0121	Qi et al. (2018)
17PM02-4-28	0.0757353	3.45293	2.03231	5.36224	0.194775	0.0025453	0.655135	1.67373	1087.96	41.341	1126.39	22.5755	1147.19	18.6608	98%	1087.96	41.341	Qi et al. (2018)
17PM02-4-29	0.073666	3.4533	1.70094	4.9949	0.167293	0.00192128	0.549694	0.883211	1031.48	44.3872	1008.88	20.9648	997.177	15.2705	98%	997.177	15.2705	Qi et al. (2018)
17PM02-4-30	0.0744673	3.45558	1.8	5.92293	0.175644	0.00225914	0.485273	0.988755	1053.71	50.5776	1045.46	24.0755	1043.13	16.8947	99%	1053.71	50.5776	Qi et al. (2018)
17PM02-4-31	0.0789683	3.45612	2.11187	6.6406	0.193265	0.00219838	0.426146	1.11031	1172.22	54.1236	1152.69	26.0593	1139.04	17.2746	98%	1172.22	54.1236	Qi et al. (2018)
17PM02-4-32	0.190168	3.47341	13.5465	29.4494	0.515788	0.006282	0.564267	0.580789	2743.53	59.5749	2718.54	48.0826	2681.29	39.8217	98%	2743.53	59.5749	Qi et al. (2018)
17PM02-4-33	0.0750974	3.45673	1.76512	6.10632	0.170915	0.00229992	0.47536	1.36156	1072.22	59.9209	1032.73	24.702	1017.15	16.9061	98%	1072.22	59.9209	Qi et al. (2018)
17PM02-4-34	0.0865689	3.4679	2.5715	10.9657	0.216494	0.00319563	0.365372	0.525853	1350.92	80.7275	1292.57	36.0669	1263.32	21.9168	97%	1350.92	80.7275	Qi et al. (2018)
17PM02-4-35	0.0775106	3.45963	1.87684	7.25815	0.175937	0.00264051	0.443382	1.73188	1144.45	68.8376	1072.95	28.2495	1044.74	18.491	97%	1144.45	68.8376	Qi et al. (2018)
17PM02-4-36	0.0955005	3.46124	3.48628	10.7924	0.26505	0.00341624	0.44029	0.957312	1538.89	59.4988	1524.11	33.6049	1515.63	24.118	99%	1538.89	59.4988	Qi et al. (2018)
17PM02-4-37	0.0716688	3.4572	1.64208	6.27405	0.165806	0.00182664	0.347869	1.8919	975.93	60.3911	986.513	25.4757	988.961	14.8543	99%	988.961	14.8543	Qi et al. (2018)
17PM02-4-38	0.0719754	3.45834	1.74793	6.82336	0.175868	0.00186708	0.317136	1.30887	987.04	69.2669	1026.4	27.1598	1044.36	15.3969	98%	987.04	69.2669	Qi et al. (2018)
17PM02-4-39	0.0601055	3.45965	0.858593	5.13467	0.10363	0.00149245	0.329947	1.99914	607.12	88.4848	629.354	22.8203	635.645	11.1804	99%	635.645	11.1804	Qi et al. (2018)
17PM02-4-40	0.0725197	3.4631	1.78604	8.31965	0.178383	0.00233908	0.310486	0.958999	1011.11	82.1659	1040.38	32.1454	1058.13	17.3073	98%	1011.11	82.1659	Qi et al. (2018)
17PM02-4-41	0.0873088	3.4683	2.83165	12.1109	0.234999	0.0029361	0.305223	0.790312	1368.52	81.2462	1363.96	37.6911	1360.65	21.4344	99%	1368.52	81.2462	Qi et al. (2018)
17PM02-4-42	0.0676913	3.45957	1.35103	6.26758	0.1446	0.00186276	0.335177	0.874502	858.94	106.446	868.004	26.3847	870.622	14.2127	99%	870.622	14.2127	Qi et al. (2018)
17PM02-4-43	0.106812	3.46688	4.53948	15.0756	0.307678	0.00367207	0.369529	0.267518	1746.29	64.5369	1738.23	38.6924	1729.27	26.2753	99%	1746.29	64.5369	Qi et al. (2018)
17PM02-4-44	0.0693622	3.45821	1.3383	5.79222	0.139982	0.00184725	0.383296	1.07711	909.26	76.4004	862.491	24.3125	844.561	13.9868	97%	844.561	13.9868	Qi et al. (2018)
17PM02-4-45	0.0870184	3.45706	2.89847	8.22581	0.240895	0.00270904	0.438149	1.08574	1361.11	48.6648	1381.51	29.4095	1391.35	20.8054	99%	1361.11	48.6648	Qi et al. (2018)
17PM02-4-46	0.0715025	3.45643	1.52856	5.59686	0.155199	0.00188705	0.42633	0.803697	972.225	62.3153	941.921	23.1084	930.043	14.6903	98%	930.043	14.6903	Qi et al. (2018)
17PM02-4-47	0.129237	3.46354	6.64606	16.0875	0.372608	0.00478385	0.543492	0.727378	2087.34	49.529	2065.48	39.1	2041.66	31.7862	98%	2087.34	49.529	Qi et al. (2018)
17PM02-4-48	0.0730324	3.45611	1.67568	5.89502	0.166227	0.00218615	0.465312	1.12595	1016.66	55.2298	999.344	24.0656	991.291	16.2854	99%	991.291	16.2854	Qi et al. (2018)
17PM02-4-49	0.0938036	3.45675	3.57999	9.40593	0.275385	0.00363397	0.541359	1.67021	1505.56	49.3357	1545.11	31.4095	1568.08	25.2115	98%	1505.56	49.3357	Qi et al. (2018)
17PM02-4-50	0.065507	3.45597	0.99639	4.74145	0.11084	0.00248729	0.701433	1.2399	790.74	66.0334	701.975	19.729	677.622	16.2493	96%	677.622	16.2493	Qi et al. (2018)
17PM02-4-51	0.0740791	3.45639	1.66051	5.88246	0.16247	0.00193353	0.418631	0.546016	1043.53	58.7476	993.569	24.0363	970.486	15.1395	97%	970.486	15.1395	Qi et al. (2018)
17PM02-4-52	0.0636245	3.46334	0.983283	5.98171	0.111698	0.0017168	0.31202	1.22952	727.785	97.9074	695.287	27.1831	682.6	12.4748	98%	682.6	12.4748	Qi et al. (2018)
17PM02-4-53	0.0949734	3.45485	3.39566	7.50252	0.259659	0.00333455	0.657646	1.15146	1527.79	40.5949	1503.4	28.5353	1488.1	23.6601	98%	1527.79	40.5949	Qi et al. (2018)
17PM02-4-54	0.087105	3.45821	2.98003	8.77073	0.248905	0.00310482	0.462476	0.649202	1362.65	56.958	1402.54	30.4135	1432.83	22.491	97%	1362.65	56.958	Qi et al. (2018)
17PM02-4-55	0.0752182	3.45356	1.7851	5.17587	0.171784	0.00185214	0.50597	0.843506	1075.93	45.9376	1040.04	21.6734	1021.94	15.182	98%	1075.93	45.9376	Qi et al. (2018)
17PM02-4-56	0.0903844	3.46062	3.00394	9.46995	0.242207	0.0030772	0.433913	0.856341	1435.19	66.1486	1408.62	31.7235	1398.16	22.1838	99%	1435.19	66.1486	Qi et al. (2018)
17PM02-4-57	0.118417	3.45854	5.51438	12.3884	0.337168	0.00410293	0.564809	0.916373	1932.41	48.011	1902.84	35.6584	1873.03	28.5792	98%	1932.41	48.011	Qi et al. (2018)
17PM02-4-58	0.0790483	3.45571	2.03171	6.26039	0.186311	0.00216307	0.455032	0.941678	1173.15	57.7624	1126.19	25.0341	1101.36	16.8904	97%	1173.15	57.7624	Qi et al. (2018)
17PM02-4-59	0.122417	3.45858	5.99915	12.6126	0.354096	0.00328283	0.45911	0.948613	1991.66	44.1468	1975.72	36.1934	1954.13	26.5973	98%	1991.66	44.1468	Qi et al. (2018)
17PM02-4-60	0.0783204	3.45402	2.15991	5.85914	0.199265	0.0020835	0.481386	1.1116	1155.25	42.2233	1168.24	24.0266	1171.37	17.0837	99%	1155.25	42.2233	Qi et al. (2018)
17PM02-4-61	0.0722261	3.45439	1.69195	5.46426	0.169138	0.00178633	0.426696	1.35303	992.28	51.4365	1005.5	22.5569	1007.36	14.8357	99%	992.28	51.4365	Qi et al. (2018)
17PM02-4-62	0.0708849	3.45446	1.64203	5.4486	0.167247	0.0017623	0.41518	0.988782	953.7	54.0511	986.493	22.4966	996.927	14.6722	98%	996.927	14.6722	Qi et al. (2018)
17PM02-4-63	0.0732937	3.45452	1.66188	5.36929	0.16367	0.00179137	0.447666	0.85266	1021.91	51.5777	994.095	22.2185	977.141	14.6386	98%	977.141	14.6386	Qi et al. (2018)
17PM02-4-64	0.0747236	3.4582	1.73757	6.52526	0.16825	0.00210116	0.394476	1.17788	1061.12	66.5544	1022.56	26.1619	1002.46	16.0099	98%	1061.12	66.5544	Qi et al. (2018)
17PM02-4-65	0.0758267	3.45619	1.85995	5.98606	0.178148	0.00211283	0.454919	1.98989	1100	57.2476	1066.97	24.2557	1056.85	16.405	99%	1100	57.2476	Qi et al. (2018)
17PM02-4-66	0.0761618	3.45446	2.16412	6.13879	0.204792	0.00203745	0.427506	0.923677	1099.08	49.5224	1169.6	24.7393	1201.01	17.1406	97%	1099.08	49.5224	Qi et al. (2018)
17PM02-4-67	0.0755347	3.45323	1.91546	5.15031	0.183254	0.00196494	0.544928	0.961294	1083.34	43.2778	1086.49	21.7956	1084.72	16.041	99%	1083.34	43.2778	Qi et al. (2018)
17PM02-4-68	0.0645828	3.45442	1.0875	4.57163	0.121719	0.00122612	0.373995	0.805239	761.115	58.68	747.289	18.6068	740.451	10.7774	99%	740.451	10.7774	Qi et al. (2018)
17PM02-4-69	0.0951256	3.45457	3.43666	7.58199	0.261016	0.00293076	0.574172	1.64613	1531.49	42.8809	1512.82	28.697	1495.04	22.2615	98%	1531.49	42.8809	Qi et al. (2018)
17PM02-4-70	0.0975638	3.46961	3.56503	15.0226	0.264304	0.0032801	0.302894	1.22635	1588.89	75.2541	1541.78	40.8069	1511.83	23.5995	98%	1588.89	75.2541	Qi et al. (2018)
17PM02-4-71	0.0740191	3.45488	1.69932	5.43508	0.166512	0.00181768	0.447023	0.980754	1042.6	57.1202	1008.28	22.4585	992.867	14.8482	98%	992.867	14.8482	Qi et al. (2018)
																		Qi et al. (2018)
Xixi Fm, Cryogenian, N 25°60'18", E 119°23'57"																		Qi et al. (2018)
17PM02-17-01	0.073574	3.45422	1.78091	5.58396	0.175208	0.00214163	0.501252	0.408376	1031.48	49.1511	1038.51	22.9791	1040.74	16.4128	99%	1031.48	49.1511	Qi et al. (2018)
17PM02-17-02	0.0702684	3.45381	1.60282	5.03239	0.165896	0.00209956	0.562501	0.686192	1000	50.7388	971.309	20.9731	989.46	15.9221	98%	989.46	15.9221	Qi et al. (2018)
17PM02-17-03	0.0755337	3.45399	2.0289	5.79951	0.194356	0.00228853	0.517468	0.173225	1083.34	47.7054	1125.25	23.7541	1144.93	17.6514	98%	1083.34	47.7054	Qi et al. (2018)
17PM02-17-04	0.0727229	3.45311	1.72664	4.95712	0.172426	0.00215991	0.617894	0.903376	1005.55	48.1429	1018.5	20.8797	1025.47	16.3886	99%	1005.55	48.1429	Qi et al. (2018)
17PM02-17-05	0.0727602	3.45475	1.54407	5.0314	0.155065	0.00206359	0.570019	0.392591	1007.1	48.1489	948.127	20.9176	929.294	15.4073	97%	929.294	15.4073	Qi et al. (2018)
17PM02-17-06	0.0726099	3.45767	1.74239	6.70719	0.174407	0.00266385	0.465632	0.246725	1003.39	65.7283	1024.35	26.7754	1036.35	18.5492	98%	1003.39	65.7283	Qi et al. (2018)
17PM02-17-07	0.0681882	3.45616	1.48161	5.70594	0.160907	0.00472643	0.967412	0.363476	875.925	96.3943	922.89	23.606	961.818	28.3024	95%	961.818	28.3024	Qi et al. (2018)
17PM02-17-08	0.0737959	3.45573	1.71543	5.89439	0.168559	0.00230892	0.496222	0.338789	1035.19	57.9715	1014.32	24.0291	1004.17	16.8684	98%	1035.19	57.9715	Qi et al. (2018)
17PM02-17-09	0.0688415	3.45571	1.63697	6.08153	0.172205	0.00250444	0.479363	1.34827	894.445	62.0139	984.545	24.7851	1024.25	17.8027	96%	894.445	62.0139	Qi et al. (2018)
17PM02-17-10	0.0701944	3.45335	1.59733	5.12744	0.163995	0.00210469	0.54846	0.433157	1000	47.2373	969.165	21.3167	978.939	15.8777	98%	978.939	15.8777	Qi et al. (2018)
17PM02-17-11	0.0795567	3.45612	2.12796	6.44109	0.193874	0.00325651	0.661832	1.05147	1187.04	49.6073	1157.92	25.5189	1142.33	21.6209	98%	1187.04	49.6073	Qi et al. (2018)
17PM02-17-12	0.0698217	3.45521	1.59166	5.63685	0.165306	0.00261598	0.571072	0.498495	924.07	63.0287	966.948	23.2036	986.199	18.0939	98%	986.199	18.0939	Qi et al. (2018)
17PM02-17-13	0.0949829	3.45696	3.6448	9.27818	0.277243	0.00356947	0.546377	0.861554	1527.79	50.5879	1559.37	31.2432	1577.46	25.0276	98%	1527.79	50.5879	Qi et al. (2018)
17PM02-17-14	0.0785916	3.46193	2.09993	8.38281	0.193886	0.00373031	0.530726	1.01971	1162.04	75.0229	1148.78	30.9873	1142.39	23.7484	99%	1162.04	75.0229	Qi et al. (2018)
17PM02-17-15	0.0701561	3.45325	1.76791	5.10664	0.182039	0.00246515	0.645458	0.445374	933.02	46.1558	1033.75	21.4291	1078.1	17.9366	95%	933.02	46.1558	Qi et al. (2018)
17PM02-17-16	0.0781549	3.46138	2.04906	8.14624	0.190011	0.00351642	0.515841	0.428633	1150.93	72.7396	1131.98	30.4621	1121.43	22.7023	99%	1150.93	72.7396	Qi et al. (2018)
17PM02-17-17	0.0751176	3.45473	1.92933	6.0008	0.184675	0.00270746	0.581144	0.808768	1072.22	46.777	1091.31	24.2912	1092.46	19.0213	99%	1072.22	46.777	Qi et al. (2018)
17PM02-17-18	0.0750364	3.45356	1.79702	5.15748	0.172537	0.00217383	0.599158	0.582838	1069.44	44.9008	1044.38	21.6313	1026.07	16.4479	98%	1069.44	44.9008	Qi et al. (2018)
17PM02-17-19	0.0796242	3.45594	2.13542	6.37611	0.194582	0.00381123	0.785757	0.748812	1187.96	54.4995	1160.34	25.3467	1146.15	24.1315	98%	1187.96	54.4995	Qi et al. (2018)
17PM02-17-20	0.0719598	3.46005	1.63306	7.03107	0.164713	0.00271201	0.441351	1.53845	984.88	75.7326	983.038	28.2805	982.915	18.5065	99%	982.915	18.5065	Qi et al. (2018)
17PM02-17-21	0.0763599	3.45458	1.96139	5.90487	0.185343	0.00268542	0.598481	0.260737	1105.56	49.5616	1102.36	24.0151	1096.1	18.9477	99%	1105.56	49.5616	Qi et al. (2018)
17PM02-17-22	0.0710343	3.45342	1.64637	5.16571	0.167216	0.00226656	0.588802	1.07687	966.665	47.0593	988.158	21.4917	996.756	16.6495	99%	996.756	16.6495	Qi et al. (2018)
17PM02-17-23	0.0765656	3.45449	1.92171	5.83439	0.180898	0.00230458	0.52531	0.530761	1109.26	48.5736	1088.66	23.7967	1071.88	17.2518	98%	1109.26	48.5736	Qi et al. (2018)
17PM02-17-24	0.0807773	3.45767	2.15749	7.15875	0.193167	0.00315762	0.565258	0.60641	1216.66	59.8848	1167.47	27.4247	1138.51	21.1721	97%	1216.66	59.8848	Qi et al. (2018)
17PM02-17-25	0.0858932	3.45519	2.71477	6.97815	0.227957	0.00256182	0.505861	0.453664	1335.49	52.82	1332.5	26.9654	1323.78	19.8349	99%	1335.49	52.82	Qi et al. (2018)
17PM02-17-26	0.0963159	3.45518	3.56515	7.87468	0.267699	0.00310942	0.587453	0.45143	1554.02	44.6095	1541.81	29.2486	1529.11	23.1001	99%	1554.02	44.6095	Qi et al. (2018)
17PM02-17-27	0.0712254	3.45412	1.59203	5.12701	0.162352	0.00211427	0.554776	0.299982	964.81	51.5935	967.094	21.3114	969.834	15.8612	99%	969.834	15.8612	Qi et al. (2018)
17PM02-17-28	0.0829414	3.46626	2.26506	9.98012	0.198573	0.00420493	0.513397	1.22675	1277.78	82.2077	1201.48	34.8474	1167.65	26.0163	97%	1277.78	82.2077	Qi et al. (2018)
17PM02-17-29	0.0864974	3.45468	2.69942	6.81538	0.226455	0.00290089	0.591911	0.312473	1349.99	46.1119	1328.3	26.6385	1315.89	21.036	99%	1349.99	46.1119	Qi et al. (2018)
17PM02-17-30	0.0787297	3.45332	1.97047	5.37757	0.181439	0.00223087	0.594682	0.611075	1164.82	41.8714	1105.47	22.5245	1074.83	16.9793	97%	1164.82	41.8714	Qi et al. (2018)
17PM02-17-31	0.0780263	3.45506	2.01094	6.13416	0.187178	0.00245808	0.524944	0.657202	1147.84	51.0994	1119.21	24.6792	1106.07	18.0705	98%	1147.84	51.0994	Qi et al. (2018)
17PM02-17-32	0.071902	3.45315	1.65772	5.06377	0.167181	0.00200349	0.544292	0.188065	983.335	48.0229	992.505	21.1442	996.563	15.5853	99%	996.563	15.5853	Qi et al. (2018)
17PM02-17-33	0.100314	3.46331	4.08674	13.253	0.29737	0.00463873	0.498836	0.964084	1631.48	61.9438	1651.66	36.7476	1678.25	29.5446	98%	1631.48	61.9438	Qi et al. (2018)
17PM02-17-34	0.0660934	3.45429	1.12756	4.66584	0.124229	0.0017001	0.501969	0.523261	809.26	55.9878	766.589	19.1299	754.856	12.812	98%	754.856	12.812	Qi et al. (2018)
17PM02-17-35	0.0778279	3.45355	2.02247	5.72284	0.188043	0.00217488	0.517507	0.605245	1142.6	44.6561	1123.09	23.5385	1110.77	16.9975	98%	1142.6	44.6561	Qi et al. (2018)
17PM02-17-36	0.0727727	3.45665	1.68705	6.03602	0.169329	0.00235913	0.47865	0.729574	1009.26	62.1688	1003.65	24.5492	1008.41	17.1023	99%	1009.26	62.1688	Qi et al. (2018)
17PM02-17-37	0.072761	3.45369	1.66745	5.08013	0.166326	0.0018145	0.495315	0.333761	1007.1	47.2782	996.216	21.2123	991.836	14.829	99%	991.836	14.829	Qi et al. (2018)
17PM02-17-38	0.0827859	3.4625	2.23862	8.68512	0.197275	0.00296529	0.423568	1.03632	1264.81	71.5922	1193.22	31.3928	1160.66	20.4525	97%	1264.81	71.5922	Qi et al. (2018)
17PM02-17-39	0.0826545	3.45596	2.12531	6.41863	0.186618	0.00251709	0.533431	0.986632	1261.11	52.2069	1157.06	25.4593	1103.03	18.291	95%	1261.11	52.2069	Qi et al. (2018)
17PM02-17-40	0.0690476	3.45401	1.54025	5.24959	0.161352	0.002141	0.523564	0.263867	901.85	52.0405	946.603	21.7548	964.283	15.9379	98%	964.283	15.9379	Qi et al. (2018)
17PM02-17-41	0.0797874	3.45467	2.18059	6.16313	0.19802	0.00260383	0.565996	0.624007	1191.66	48.3575	1174.87	24.8104	1164.68	18.9956	99%	1191.66	48.3575	Qi et al. (2018)
17PM02-17-42	0.076386	3.45396	2.02393	5.697	0.192085	0.00228813	0.537278	1.62173	1105.56	46.8316	1123.58	23.4691	1132.66	17.5701	99%	1105.56	46.8316	Qi et al. (2018)
17PM02-17-43	0.077976	3.45606	2.02891	6.38858	0.189128	0.00286069	0.574914	0.590852	1146.3	55.0006	1125.25	25.3957	1116.65	19.7925	99%	1146.3	55.0006	Qi et al. (2018)
17PM02-17-44	0.13357	3.45886	7.37011	14.5833	0.400059	0.00456485	0.594125	0.218715	2146.29	47.2196	2157.35	38.5806	2169.31	31.8207	99%	2146.29	47.2196	Qi et al. (2018)
17PM02-17-45	0.0777953	3.45933	2.05401	7.10187	0.194557	0.00274288	0.469036	0.366466	1142.6	67.3415	1133.63	27.403	1146.02	19.4524	98%	1142.6	67.3415	Qi et al. (2018)
17PM02-17-46	0.0726711	3.45373	1.7109	6.12154	0.16895	0.00283705	0.572846	0.0237641	1005.55	47.2698	1012.62	24.8164	1006.32	19.1732	99%	1005.55	47.2698	Qi et al. (2018)
17PM02-17-47	0.0735553	3.45353	1.799	5.29428	0.177379	0.0019768	0.50584	0.359272	1029.32	45.6657	1045.09	22.0646	1052.64	15.8601	99%	1029.32	45.6657	Qi et al. (2018)
17PM02-17-48	0.0716562	3.45388	1.55161	5.06238	0.15721	0.00178047	0.48171	0.221257	975.93	49.1513	951.136	21.0415	941.256	14.3469	98%	941.256	14.3469	Qi et al. (2018)
17PM02-17-49	0.0966872	3.45656	3.63783	10.4765	0.271286	0.00435027	0.590978	0.265188	1561.12	47.9197	1557.85	33.0067	1547.32	27.8749	99%	1561.12	47.9197	Qi et al. (2018)
17PM02-17-50	0.0741359	3.45631	1.87953	6.29759	0.184889	0.00221724	0.431077	0.78291	1055.56	59.8379	1073.9	25.2133	1093.63	17.0465	98%	1055.56	59.8379	Qi et al. (2018)
17PM02-17-51	0.0693698	3.45482	1.54866	5.22516	0.162038	0.00203975	0.503648	0.424173	909.26	57.4283	949.958	21.6619	968.093	15.5472	98%	968.093	15.5472	Qi et al. (2018)
17PM02-17-52	0.078791	3.45683	2.10637	6.68728	0.195543	0.00263807	0.499239	0.970489	1168.52	52.5135	1150.89	26.1891	1151.33	19.0557	99%	1168.52	52.5135	Qi et al. (2018)
17PM02-17-53	0.0879324	3.45481	2.98182	7.21315	0.246721	0.0033333	0.639299	0.326547	1381.17	45.6722	1403	27.6232	1421.54	23.2845	98%	1381.17	45.6722	Qi et al. (2018)
17PM02-17-54	0.0711527	3.45291	1.66481	4.99245	0.169802	0.00244056	0.673981	0.742835	961.11	47.9052	995.209	20.9048	1011.02	17.4602	98%	961.11	47.9052	Qi et al. (2018)
17PM02-17-55	0.0875799	3.46677	2.75439	10.1425	0.229046	0.00319245	0.403443	0.860967	1373.15	81.714	1343.28	33.5423	1329.5	22.2435	98%	1373.15	81.714	Qi et al. (2018)
17PM02-17-56	0.0700416	3.45393	1.55318	5.09759	0.161237	0.00200803	0.523263	0.419553	929.32	50.8357	951.76	21.1765	963.646	15.3914	98%	963.646	15.3914	Qi et al. (2018)
17PM02-17-57	0.0685717	3.45584	1.58548	5.80535	0.168157	0.00219594	0.447756	0.555077	887.035	58.2359	964.523	23.8405	1001.95	16.3895	96%	887.035	58.2359	Qi et al. (2018)
17PM02-17-58	0.117449	3.46022	5.70621	13.7756	0.351764	0.00416877	0.507655	1.21333	1917.59	50.7557	1932.31	36.9375	1943.02	29.2086	99%	1917.59	50.7557	Qi et al. (2018)
17PM02-17-59	0.155103	3.46356	9.66984	19.2771	0.45186	0.00486576	0.549346	0.728029	2402.78	51.0828	2403.84	42.5127	2403.52	34.1679	99%	2402.78	51.0828	Qi et al. (2018)
17PM02-17-60	0.0775898	3.45453	1.94911	5.6226	0.182169	0.00204108	0.497183	1.39165	1136.12	44.4699	1098.14	23.1945	1078.82	16.2802	98%	1136.12	44.4699	Qi et al. (2018)
17PM02-17-61	0.0700328	3.45328	1.57563	4.91827	0.162805	0.00173706	0.487965	0.595413	929.32	46.4303	960.649	20.5217	972.347	14.4018	98%	972.347	14.4018	Qi et al. (2018)
17PM02-17-62	0.0873312	3.45338	2.98988	6.31137	0.247647	0.00261811	0.602611	0.386549	1368.52	22.5899	1405.05	26.1627	1426.33	20.7304	98%	1368.52	22.5899	Qi et al. (2018)
17PM02-17-63	0.0962672	3.45528	3.7396	7.82485	0.281746	0.00300204	0.569762	0.497272	1553.71	44.6068	1579.89	29.4043	1600.15	23.2062	98%	1553.71	44.6068	Qi et al. (2018)
17PM02-17-64	0.0725138	3.45349	1.6847	5.12221	0.167507	0.00176408	0.475591	0.604548	1011.11	41.2705	1002.76	21.3764	998.362	14.6891	99%	998.362	14.6891	Qi et al. (2018)
17PM02-17-65	0.0619452	3.4541	0.87596	4.21018	0.102382	0.00130884	0.481645	0.433341	672.235	59.1609	638.799	16.2178	628.352	10.3184	98%	628.352	10.3184	Qi et al. (2018)
17PM02-17-66	0.0754098	3.45366	1.96429	5.61967	0.187843	0.00243559	0.580336	0.576897	1079.63	45.675	1103.35	23.1992	1109.68	18.002	99%	1079.63	45.675	Qi et al. (2018)
17PM02-17-67	0.0748895	3.45374	1.88126	5.32714	0.181603	0.00184989	0.478212	0.425421	1064.82	46.8804	1074.51	22.2606	1075.73	15.5632	99%	1064.82	46.8804	Qi et al. (2018)
17PM02-17-68	0.0730222	3.45435	1.72152	5.37555	0.170851	0.00205962	0.509726	0.879605	1014.5	51.2533	1016.59	22.2663	1016.8	15.9371	99%	1014.5	51.2533	Qi et al. (2018)
17PM02-17-69	0.0702274	3.45587	1.50639	5.53806	0.155871	0.00189327	0.427138	0.269985	1000	61.382	932.979	22.8997	933.79	14.7395	99%	933.79	14.7395	Qi et al. (2018)
17PM02-17-70	0.062611	3.45653	0.969783	4.76066	0.111961	0.00108719	0.292803	0.51136	694.455	73.0648	688.352	19.9092	684.124	9.8231	99%	684.124	9.8231	Qi et al. (2018)
17PM02-17-71	0.0759801	3.45536	2.14593	6.62884	0.204194	0.00237891	0.444591	0.883189	1094.44	53.705	1163.74	26.0142	1197.81	18.3358	97%	1094.44	53.705	Qi et al. (2018)

## Sheet: Jiangxi sub-basin
Table S3: U-Pb isotopic compositions and ages of detrital zircons from the Jiangxi sub-basin
	207Pb/206Pb		207Pb/235U		206Pb/238U			Th/U	207Pb/206Pb		207Pb/235U		206Pb/238U		Con.
Spot.	Ratio	1sigma	Ratio	1sigma	Ratio	1sigma	rho	Ratio	Age (Ma)	1sigma	Age (Ma)	1sigma	Age (Ma)	1sigma		Used age	1sigma	Reference
Oujiadong Fm, middle Cambrian, N25°06'42.9", 115°42'35.9"
GNW1440-01	0.0664032	0.0125967	1.15608	0.0183791	0.126184	0.00122378	0.61005	0.880599	820.37	20.8792	780.112	7.40466	766.059	6.9312	98%	766.059	6.9312	Xue et al. (2019)
GNW1440-02	0.0649799	0.00878641	1.33382	0.0159737	0.148833	0.00121116	0.679503	1.1142	773.77	11.0684	860.542	4.55179	894.421	6.72892	96%	894.421	6.72892	Xue et al. (2019)
GNW1440-03	0.0632519	0.00869852	1.10973	0.0139766	0.127232	0.00115886	0.723186	1.98417	716.675	8.42266	758.042	4.48919	772.055	6.54926	98%	772.055	6.54926	Xue et al. (2019)
GNW1440-04	0.0656589	0.010344	0.973545	0.0185626	0.10776	0.00172603	0.840053	0.327748	794.445	13.7047	690.289	7.34053	659.727	9.99489	95%	659.727	9.99489	Xue et al. (2019)
GNW1440-05	0.0553457	0.0102796	0.487023	0.00739091	0.0638183	0.000712461	0.735643	0.018383	433.38	13.1877	402.88	3.8368	398.805	4.25045	98%	398.805	4.25045	Xue et al. (2019)
GNW1440-05R	0.055503	0.0110489	0.523249	0.00699719	0.0683511	0.000514898	0.563327	0.034483	431.53	16.8393	427.319	3.36361	426.214	3.00406	99%	426.214	3.00406	Xue et al. (2019)
GNW1440-06	0.0652553	0.00977265	1.21308	0.0176412	0.134945	0.00145328	0.740547	1.52058	783.335	11.9447	806.605	5.50159	816.013	8.19333	98%	816.013	8.19333	Xue et al. (2019)
GNW1440-07	0.0616651	0.00864264	0.868805	0.0111581	0.102155	0.000970454	0.739691	1.06874	661.125	38.1401	634.918	4.22897	627.024	5.591	98%	627.024	5.591	Xue et al. (2019)
GNW1440-08	0.0632145	0.008724	1.06577	0.013919	0.122259	0.00118822	0.744166	0.885854	716.675	6.85312	736.664	4.81163	743.555	6.74938	99%	743.555	6.74938	Xue et al. (2019)
GNW1440-09	0.0563997	0.00855617	0.570576	0.00732213	0.0733857	0.000701879	0.745293	0.0151409	477.82	6.16586	458.387	2.96546	456.521	4.13281	99%	456.521	4.13281	Xue et al. (2019)
GNW1440-10	0.0571163	0.00847798	0.595101	0.00732324	0.0755364	0.000673753	0.724822	0.0315957	494.485	2.91953	474.12	3.12955	469.425	3.94897	99%	469.425	3.94897	Xue et al. (2019)
GNW1440-11	0.0663659	0.010427	0.936518	0.0141309	0.102605	0.00111905	0.722815	1.79796	816.665	13.7456	671.058	3.82378	629.658	6.46866	93%	629.658	6.46866	Xue et al. (2019)
GNW1440-12	0.0632123	0.00905599	0.868126	0.0106028	0.0996146	0.000816333	0.670976	0.80862	716.675	9.38629	634.549	3.67686	612.15	4.68626	96%	612.15	4.68626	Xue et al. (2019)
GNW1440-13	0.0646408	0.0086092	1.15317	0.0142162	0.129379	0.00114161	0.715756	0.658524	762.66	4.36992	778.739	4.33007	784.324	6.43716	99%	784.324	6.43716	Xue et al. (2019)
GNW1440-14	0.068321	0.0109802	1.11389	0.0188306	0.118115	0.00151823	0.760348	1.54719	879.63	15.6148	760.046	6.89037	719.703	8.69446	94%	719.703	8.69446	Xue et al. (2019)
GNW1440-15	0.0645422	0.0101424	0.928788	0.0229799	0.10381	0.00234273	0.912117	0.662776	761.115	13.6453	666.997	12.9179	636.698	13.6464	95%	636.698	13.6464	Xue et al. (2019)
GNW1440-16	0.064731	0.00865648	1.16532	0.0156259	0.13055	0.00133692	0.763706	0.799064	764.82	7.01442	784.451	5.26148	791.004	7.55584	99%	791.004	7.55584	Xue et al. (2019)
GNW1440-17	0.0648707	0.00877411	1.14117	0.0157882	0.127581	0.00136473	0.773177	1.13021	770.06	7.03237	773.064	5.47472	774.05	7.73609	99%	774.05	7.73609	Xue et al. (2019)
GNW1440-18	0.0644261	0.00862447	1.16713	0.0168739	0.13137	0.00152435	0.802586	0.877645	766.67	7.02075	785.303	6.06294	795.678	8.62669	98%	795.678	8.62669	Xue et al. (2019)
GNW1440-19	0.097116	0.00856785	3.3912	0.0446173	0.253165	0.00252776	0.758896	0.9741	1569.44	10.3972	1502.36	8.24361	1454.78	13.1165	96%	1569.44	10.3972	Xue et al. (2019)
GNW1440-20	0.0640346	0.00867462	1.05387	0.0149703	0.119357	0.00134261	0.791883	0.606724	742.6	7.83263	730.799	5.51243	726.859	7.66537	99%	726.859	7.66537	Xue et al. (2019)
GNW1440-21	0.0653226	0.00910031	1.1177	0.0141783	0.124087	0.00109661	0.696668	1.13176	784.88	10.2479	761.872	4.52036	754.047	6.20636	98%	754.047	6.20636	Xue et al. (2019)
GNW1440-22	0.0633747	0.00874831	1.12139	0.0147245	0.128244	0.00125574	0.745725	1.10972	720.38	4.89783	763.64	5.4019	777.842	7.10301	98%	777.842	7.10301	Xue et al. (2019)
GNW1440-23	0.112156	0.00863439	4.72799	0.0642876	0.305712	0.00321118	0.772503	0.700047	1835.19	11.089	1772.21	9.25695	1719.57	16.0867	96%	1835.19	11.089	Xue et al. (2019)
GNW1440-24	0.0639915	0.00864791	0.737089	0.00983184	0.0835255	0.000848251	0.76136	0.211475	742.6	4.26019	560.705	4.03136	517.132	4.96673	91%	517.132	4.96673	Xue et al. (2019)
GNW1440-25	0.0640109	0.00856335	1.08616	0.0139095	0.123021	0.00117138	0.743539	1.44676	742.6	6.33955	746.639	4.77646	747.926	6.64695	99%	747.926	6.64695	Xue et al. (2019)
GNW1440-26	0.066862	0.00939046	1.15372	0.0158184	0.125245	0.00125122	0.728638	2.52324	835.18	6.58113	779	4.64969	760.683	7.09589	97%	760.683	7.09589	Xue et al. (2019)
GNW1440-27	0.0648583	0.00873748	1.10492	0.0138166	0.12352	0.00110495	0.715375	1.26376	768.52	7.02709	755.727	4.50003	750.793	6.25804	99%	750.793	6.25804	Xue et al. (2019)
GNW1440-28	0.0600703	0.00958723	0.670455	0.00837333	0.0809308	0.000647752	0.640866	0.27882	605.575	11.6137	520.989	3.17302	501.676	3.76166	96%	501.676	3.76166	Xue et al. (2019)
GNW1440-29	0.0661905	0.00885115	1.2291	0.0149059	0.134682	0.00111658	0.683615	1.13895	812.96	8.69465	813.93	4.06569	814.52	6.26365	99%	814.52	6.26365	Xue et al. (2019)
GNW1440-30	0.0652063	0.0088547	1.18004	0.0154089	0.13124	0.00125953	0.734964	0.753204	788.89	7.9712	791.332	4.88178	794.934	7.10606	99%	794.934	7.10606	Xue et al. (2019)
GNW1440-31	0.0640113	0.00922961	1.19943	0.0175013	0.135746	0.00153412	0.774527	2.31152	742.6	9.45152	800.322	6.81017	820.565	8.64977	97%	820.565	8.64977	Xue et al. (2019)
GNW1440-32	0.0564257	0.00860429	0.572729	0.0075452	0.0735813	0.000734057	0.757253	0.084087	477.82	6.16586	459.778	3.43143	457.696	4.32866	99%	457.696	4.32866	Xue et al. (2019)
GNW1440-33	0.0650635	0.00905982	1.1956	0.0159419	0.133234	0.00130346	0.733712	1.1513	775.93	8.58789	798.552	5.27592	806.291	7.34608	99%	806.291	7.34608	Xue et al. (2019)
GNW1440-34	0.0670737	0.0123855	0.978879	0.0144828	0.105879	0.000856896	0.547009	1.08427	838.885	20.9022	693.03	5.22323	648.772	4.89585	93%	648.772	4.89585	Xue et al. (2019)
GNW1440-35	0.0689474	0.00867028	0.928	0.0131803	0.0975848	0.00109777	0.79205	0.976265	898.15	5.11399	666.582	5.20234	600.239	6.37523	89%	600.239	6.37523	Xue et al. (2019)
GNW1440-36	0.0577952	0.00928668	0.662576	0.00964423	0.083195	0.000932471	0.770027	0.0246971	520.41	5.47083	516.188	3.92224	515.165	5.47714	99%	515.165	5.47714	Xue et al. (2019)
GNW1440-37	0.0561365	0.00867896	0.549411	0.00700609	0.0709575	0.000662946	0.732659	0.00684525	457.45	7.83795	444.611	2.99437	441.922	3.90694	99%	441.922	3.90694	Xue et al. (2019)
GNW1440-38	0.0661415	0.00902245	1.08414	0.0127223	0.118828	0.000891644	0.639427	0.943232	810.8	189.869	745.653	3.78659	723.814	5.03649	97%	723.814	5.03649	Xue et al. (2019)
GNW1440-39	0.0666355	0.00974534	1.15456	0.0157616	0.125709	0.0012018	0.700291	1.74724	827.775	12.0383	779.392	4.76781	763.34	6.8069	97%	763.34	6.8069	Xue et al. (2019)
GNW1440-40	0.0645861	0.00879324	1.09807	0.0139822	0.123254	0.00113513	0.723271	0.875696	761.115	8.54405	752.418	4.59022	749.264	6.435	99%	749.264	6.435	Xue et al. (2019)
GNW1440-41	0.0658345	0.00928601	1.14901	0.0146272	0.126597	0.00110239	0.684037	1.43527	1200	11.4414	776.777	5.13997	768.42	6.22583	98%	768.42	6.22583	Xue et al. (2019)
GNW1440-42	0.0646997	0.00873525	1.14889	0.0152576	0.128686	0.00128726	0.753227	1.27347	764.82	5.10476	776.72	5.10646	780.365	7.28198	99%	780.365	7.28198	Xue et al. (2019)
GNW1440-43	0.0662144	0.00974364	1.14368	0.0142505	0.125233	0.000972623	0.623303	5.51713	812.96	183.392	774.256	4.40147	760.615	5.47891	98%	760.615	5.47891	Xue et al. (2019)
GNW1440-44	0.0650119	0.00870631	1.15734	0.0148477	0.129114	0.0012166	0.734476	0.634927	775.93	11.0732	780.704	4.45719	782.807	6.87172	99%	782.807	6.87172	Xue et al. (2019)
GNW1440-45	0.0777159	0.0315944	0.483824	0.0188701	0.0456033	0.00104287	0.586333	0.0322076	1139.82	61.1366	400.693	10.3432	287.472	6.40258	67%	287.472	6.40258	Xue et al. (2019)
GNW1440-46	0.0646533	0.008797	0.852856	0.0135973	0.0955234	0.00127014	0.833997	0.274806	764.82	4.38174	626.216	6.57677	588.121	7.41271	93%	588.121	7.41271	Xue et al. (2019)
GNW1440-47	0.0637956	0.00905495	1.12512	0.0138645	0.127857	0.00106862	0.67826	1.15598	744.45	8.50006	765.426	4.41468	775.63	6.02319	98%	775.63	6.02319	Xue et al. (2019)
GNW1440-48	0.104905	0.00883599	4.24675	0.0774883	0.293144	0.00467985	0.874926	1.25075	1722.22	11.8848	1683.11	14.3925	1657.22	23.4619	98%	1722.22	11.8848	Xue et al. (2019)
GNW1440-49	0.064372	0.00960544	1.13065	0.015195	0.127394	0.00119742	0.699397	1.81263	753.71	11.8847	768.062	4.91935	772.982	6.77134	99%	772.982	6.77134	Xue et al. (2019)
GNW1440-50	0.0565778	0.00856254	0.530582	0.00630568	0.0679901	0.000560344	0.693474	0.0107745	475.97	2.82137	432.196	2.4898	424.035	3.28871	98%	424.035	3.28871	Xue et al. (2019)
GNW1440-51	0.0658271	0.00975033	1.07886	0.0145984	0.118907	0.00111562	0.693376	2.98309	1200	12.9842	743.078	4.57478	724.27	6.34708	97%	724.27	6.34708	Xue et al. (2019)
GNW1440-52	0.0644358	0.00954303	1.03898	0.0138542	0.11693	0.001089	0.698439	0.866484	766.67	10.2069	723.409	4.77062	712.871	6.20329	98%	712.871	6.20329	Xue et al. (2019)
GNW1440-53	0.0651326	0.00966573	1.08491	0.0149794	0.120857	0.00119157	0.714082	0.95371	788.89	11.9561	746.03	4.84545	735.495	6.77755	98%	735.495	6.77755	Xue et al. (2019)
GNW1440-54	0.0640446	0.00879564	1.11496	0.0154192	0.12629	0.00134775	0.771681	1.29895	742.6	5.00081	760.557	5.08343	766.664	7.64696	99%	766.664	7.64696	Xue et al. (2019)
GNW1440-55	0.0904923	0.00875749	3.02084	0.0439739	0.242004	0.002814	0.798792	0.658317	1436.12	9.77424	1412.9	9.169	1397.11	14.6823	98%	1436.12	9.77424	Xue et al. (2019)
GNW1440-56	0.0639157	0.0087792	1.04912	0.0139109	0.119022	0.00118272	0.749415	1.27465	738.895	8.48266	728.446	4.8189	724.933	6.73754	99%	724.933	6.73754	Xue et al. (2019)
GNW1440-57	0.0630138	0.00953371	0.948295	0.0119802	0.109024	0.000903732	0.656137	3.48778	709.27	11.7987	677.215	4.81064	667.08	5.15737	98%	667.08	5.15737	Xue et al. (2019)
GNW1440-58	0.0646966	0.00929795	0.904193	0.0118906	0.101359	0.000942601	0.707172	1.21991	764.82	10.2025	653.966	4.23679	622.366	5.43006	95%	622.366	5.43006	Xue et al. (2019)
GNW1440-59	0.0647275	0.00890077	1.1246	0.01572	0.126026	0.00135834	0.771066	0.95001	764.82	5.10476	765.174	5.29418	765.154	7.7099	99%	765.154	7.7099	Xue et al. (2019)
GNW1440-60	0.0645115	0.00890683	1.28688	0.0162693	0.144632	0.00129765	0.709685	1.29535	766.67	8.56177	839.912	4.94403	870.8	7.24313	96%	870.8	7.24313	Xue et al. (2019)
GNW1440-61	0.065792	0.00942576	1.25541	0.0172403	0.138256	0.0013808	0.727254	0.763927	799.69	10.286	825.844	6.31767	834.795	7.75643	98%	834.795	7.75643	Xue et al. (2019)
GNW1440-62	0.0641482	0.00936719	1.1794	0.0141841	0.133303	0.00100547	0.627174	0.949003	746.3	15.5424	791.035	4.26511	806.681	5.62999	98%	806.681	5.62999	Xue et al. (2019)
GNW1440-63	0.0659905	0.0127358	1.21115	0.0192976	0.133159	0.0012749	0.600902	1.11337	805.555	20.8611	805.72	6.83358	805.859	7.18256	99%	805.859	7.18256	Xue et al. (2019)
GNW1440-64	0.0633837	0.00864963	1.00182	0.0127297	0.114583	0.00106656	0.732543	1.31295	720.38	6.86529	704.733	4.54337	699.311	6.0856	99%	699.311	6.0856	Xue et al. (2019)
GNW1440-65	0.0631764	0.00892727	0.827062	0.00976057	0.0949502	0.000732895	0.654048	2.02336	722.23	8.43972	611.981	2.99631	584.747	4.20851	95%	584.747	4.20851	Xue et al. (2019)
GNW1440-66	0.0638996	0.00917052	0.780985	0.00920112	0.0885815	0.000655166	0.627784	1.15257	738.895	9.44016	586.045	3.54991	547.142	3.76862	93%	547.142	3.76862	Xue et al. (2019)
GNW1440-67	0.0664233	0.0115285	1.19118	0.0215453	0.130331	0.00181646	0.770551	3.18705	820.37	181.698	796.506	5.91786	789.755	10.31	99%	789.755	10.31	Xue et al. (2019)
GNW1440-68	0.062933	0.00896689	0.833407	0.0114482	0.0959633	0.00099862	0.757555	2.81614	705.565	12.667	615.501	4.98122	590.709	5.79548	95%	590.709	5.79548	Xue et al. (2019)
GNW1440-69	0.0599843	0.00917583	0.842527	0.0108276	0.101886	0.000916757	0.700148	0.858564	611.13	9.86749	620.539	3.80783	625.454	5.27335	99%	625.454	5.27335	Xue et al. (2019)
GNW1440-70	0.0635924	0.00880014	1.10076	0.0125997	0.125499	0.000918605	0.639471	2.69673	727.785	12.7064	753.716	3.72608	762.136	5.16261	98%	762.136	5.16261	Xue et al. (2019)
GNW1440-71	0.055684	0.00853365	0.558009	0.00663455	0.0726614	0.000601561	0.696315	0.112747	438.935	10.4774	450.23	2.61727	452.17	3.51994	99%	452.17	3.51994	Xue et al. (2019)
GNW1440-72	0.0639091	0.00867972	1.13628	0.0169175	0.128926	0.00155958	0.812485	4.38099	738.895	8.48266	770.744	6.30679	781.737	8.84777	98%	781.737	8.84777	Xue et al. (2019)
GNW1440-73	0.0636822	0.00883006	1.08872	0.0153041	0.124041	0.00135669	0.778082	2.05958	731.49	8.4647	747.881	5.17866	753.779	7.71417	99%	753.779	7.71417	Xue et al. (2019)
GNW1440-74	0.0647591	0.0090329	1.22399	0.0155385	0.137069	0.00122267	0.70265	1.17726	766.36	6.31307	811.598	4.79959	828.069	6.85944	97%	828.069	6.85944	Xue et al. (2019)
GNW1440-75	0.061751	0.0116434	0.549896	0.00768854	0.064672	0.000500618	0.553639	0.0369983	664.83	14.3779	444.929	2.62389	403.976	2.93336	90%	403.976	2.93336	Xue et al. (2019)
GNW1440-76	0.0580457	0.00870333	0.705794	0.00793327	0.0881679	0.000627135	0.632814	0.478277	531.52	7.98315	542.245	2.59578	544.693	3.5995	99%	544.693	3.5995	Xue et al. (2019)
GNW1440-77	0.0639424	0.00875761	1.17338	0.0141391	0.133065	0.00110133	0.68687	0.997176	738.895	7.81951	788.227	4.28613	805.324	6.18444	97%	805.324	6.18444	Xue et al. (2019)
GNW1440-78	0.0647697	0.00889263	1.19893	0.0158725	0.134283	0.00131699	0.740818	1.51377	768.52	8.56697	800.092	4.9199	812.252	7.41705	98%	812.252	7.41705	Xue et al. (2019)
GNW1440-79	0.16818	0.00857155	6.47925	0.097083	0.279167	0.00343091	0.820212	0.581515	2539.81	14.7781	2043.09	12.3177	1587.17	17.4327	74%	2539.81	14.7781	Xue et al. (2019)
GNW1440-80	0.0634993	0.00933181	1.11766	0.0146288	0.127688	0.0011719	0.701202	5.2797	724.08	14.4674	761.852	4.58898	774.662	6.62205	98%	774.662	6.62205	Xue et al. (2019)
																		Xue et al. (2019)
Xiazhai Fm, early Cambrian, N25°12'00.3", 115°19'56.7"																		Xue et al. (2019)
GNW1405-01	0.118707	0.00935116	4.59848	0.0507494	0.280897	0.00164635	0.531078	-	1936.73	15.047	1748.99	10.2119	1595.88	8.51943	90%	1936.73	15.047	Xue et al. (2019)
GNW1405-02	0.0789949	0.00930461	2.19236	0.025174	0.201244	0.0013541	0.585985	-	1172.22	9.75695	1178.62	7.36317	1182	7.29451	99%	1172.22	9.75695	Xue et al. (2019)
GNW1405-03	0.162814	0.00929478	10.732	0.125079	0.477979	0.0033609	0.603312	-	2484.87	19.273	2500.19	14.7481	2518.46	15.5062	99%	2484.87	19.273	Xue et al. (2019)
GNW1405-04	0.0982619	0.00938532	4.09619	0.0499319	0.302302	0.00235152	0.638129	-	1591.66	12.8952	1653.54	10.4537	1702.71	11.8684	97%	1591.66	12.8952	Xue et al. (2019)
GNW1405-05	0.0787655	0.00941165	2.34259	0.0256709	0.215665	0.00121053	0.512214	-	1166.36	10.3243	1225.31	7.1762	1258.93	6.48426	97%	1166.36	10.3243	Xue et al. (2019)
GNW1405-06	0.0659036	0.00981085	1.2182	0.0140409	0.134056	0.000810952	0.524845	-	803.39	9.64893	808.95	5.08845	810.965	4.54411	99%	810.965	4.54411	Xue et al. (2019)
GNW1405-07	0.0704082	0.00939353	1.5673	0.0177969	0.16141	0.00102973	0.561829	-	940.43	27.8142	957.36	5.98408	964.605	5.68241	99%	964.605	5.68241	Xue et al. (2019)
GNW1405-08	0.0924301	0.009412	2.97592	0.0371852	0.233503	0.00191911	0.657747	-	1476.24	12.1061	1401.49	9.21133	1352.83	10.1038	96%	1476.24	12.1061	Xue et al. (2019)
GNW1405-09	0.170769	0.00931611	10.1703	0.125756	0.431687	0.00350977	0.657532	-	2565.12	19.9461	2450.38	15.2593	2313.32	16.3869	94%	2565.12	19.9461	Xue et al. (2019)
GNW1405-10	0.164676	0.00932918	10.8167	0.118279	0.476277	0.00271678	0.521653	-	2505.55	19.492	2507.5	14.2981	2511.03	12.885	99%	2505.55	19.492	Xue et al. (2019)
GNW1405-11	0.114223	0.00935903	5.49999	0.0638211	0.349118	0.0023949	0.591172	-	1933.34	15.3402	1900.6	11.4863	1930.38	11.842	98%	1933.34	15.3402	Xue et al. (2019)
GNW1405-12	0.159394	0.00933617	9.43975	0.107119	0.429396	0.00276965	0.568412	-	2449.07	19.2488	2381.7	13.9162	2302.99	13.2097	96%	2449.07	19.2488	Xue et al. (2019)
GNW1405-13	0.0767053	0.00940751	2.18582	0.0264087	0.20661	0.00156627	0.627458	-	1122.22	9.59252	1176.54	7.81166	1210.73	8.40115	97%	1122.22	9.59252	Xue et al. (2019)
GNW1405-14	0.0713492	0.00973961	1.61958	0.0187568	0.164615	0.00103153	0.54107	-	968.515	10.513	977.828	6.08275	982.374	5.68026	99%	982.374	5.68026	Xue et al. (2019)
GNW1405-15	0.186363	0.00954716	13.0648	0.147029	0.508172	0.00302782	0.529442	-	2710.18	21.3114	2684.34	15.675	2648.82	14.0715	98%	2710.18	21.3114	Xue et al. (2019)
GNW1405-16	0.248927	0.00943001	20.9993	0.264096	0.611521	0.00508851	0.661643	-	3188.89	24.6938	3138.56	18.9444	3076.09	21.5628	97%	3188.89	24.6938	Xue et al. (2019)
GNW1405-17	0.114334	0.00942302	5.66545	0.0661064	0.35926	0.0024723	0.589771	-	1869.44	14.8633	1926.12	11.6423	1978.66	12.1551	97%	1869.44	14.8633	Xue et al. (2019)
GNW1405-18	0.0732449	0.00943903	1.81157	0.0203744	0.179329	0.00109663	0.543726	-	1020.37	8.89254	1049.64	6.37467	1063.31	5.9862	98%	1020.37	8.89254	Xue et al. (2019)
GNW1405-19	0.0709484	0.0094792	1.63667	0.0186363	0.167254	0.00105518	0.554054	-	966.665	9.28918	984.433	6.13589	996.963	5.80177	98%	996.963	5.80177	Xue et al. (2019)
GNW1405-20	0.108315	0.00950577	3.78932	0.0456369	0.253662	0.00187585	0.614029	-	1772.22	14.101	1590.48	9.99155	1457.33	9.76971	91%	1772.22	14.101	Xue et al. (2019)
GNW1405-21	0.0701268	0.0106581	1.29245	0.0163021	0.133548	0.000900858	0.534794	-	931.48	13.224	842.381	6.27673	808.076	5.06392	95%	808.076	5.06392	Xue et al. (2019)
GNW1405-22	0.188139	0.00938677	14.0103	0.158066	0.539604	0.00337744	0.554778	-	2727.78	21.1673	2750.4	15.9067	2781.79	15.3659	98%	2727.78	21.1673	Xue et al. (2019)
GNW1405-23	0.159404	0.00940683	10.2776	0.116666	0.467196	0.0029684	0.559717	-	2449.07	19.2488	2460.09	14.2801	2471.25	13.9279	99%	2449.07	19.2488	Xue et al. (2019)
GNW1405-24	0.0653207	0.0107899	1.18823	0.0150648	0.131882	0.000877977	0.525092	-	783.335	14.2971	795.139	5.4252	798.592	4.93905	99%	798.592	4.93905	Xue et al. (2019)
GNW1405-25	0.073981	0.0094556	1.8811	0.0224391	0.184167	0.00133932	0.609646	-	1042.6	12.6086	1074.45	7.26934	1089.7	7.29086	98%	1042.6	12.6086	Xue et al. (2019)
GNW1405-26	0.155881	0.00935623	10.0397	0.115162	0.466575	0.00309624	0.578527	-	2412.96	18.7636	2438.44	14.2882	2468.52	14.4573	98%	2412.96	18.7636	Xue et al. (2019)
GNW1405-27	0.0568666	0.00972888	0.730342	0.00871826	0.0930741	0.000643802	0.579456	-	487.08	8.30286	556.754	3.90492	573.692	3.72125	97%	573.692	3.72125	Xue et al. (2019)
GNW1405-28	0.0586398	0.0105495	0.763065	0.00938011	0.0942743	0.000594889	0.513329	-	553.74	11.9001	575.777	4.18374	580.767	3.42165	99%	580.767	3.42165	Xue et al. (2019)
GNW1405-29	0.0693718	0.00932782	1.57846	0.0177836	0.164828	0.00104147	0.56083	-	909.26	10.8834	961.765	5.87964	983.553	5.7348	97%	983.553	5.7348	Xue et al. (2019)
GNW1405-30	0.0937698	0.00935903	3.55731	0.0406165	0.274805	0.00179727	0.572806	-	1503.39	12.1546	1540.06	9.27681	1565.15	9.28211	98%	1503.39	12.1546	Xue et al. (2019)
GNW1405-31	0.0700608	0.00948033	1.61925	0.0184634	0.167422	0.00106071	0.555632	-	931.48	38.1822	977.699	6.0851	997.891	5.83184	97%	997.891	5.83184	Xue et al. (2019)
GNW1405-32	0.149277	0.00929386	8.55242	0.101889	0.414922	0.00309264	0.625639	-	2338.89	18.2228	2291.51	13.9717	2237.39	14.6669	97%	2338.89	18.2228	Xue et al. (2019)
GNW1405-33	0.0620438	0.0094837	1.07211	0.0119264	0.125189	0.000727921	0.522692	-	675.94	6.38732	739.774	4.45894	760.362	4.09455	97%	760.362	4.09455	Xue et al. (2019)
GNW1405-34	0.0571512	0.00934782	0.759444	0.00849218	0.0962644	0.000590734	0.548785	-	498.19	5.33141	573.689	3.62215	592.48	3.38877	96%	592.48	3.38877	Xue et al. (2019)
GNW1405-35	0.0932197	0.00924573	3.60011	0.0412321	0.279788	0.00189117	0.590176	-	1492.28	11.7866	1549.56	9.40437	1590.29	9.7265	97%	1492.28	11.7866	Xue et al. (2019)
GNW1405-36	0.0634407	0.00959506	1.1575	0.0131427	0.132213	0.000802672	0.534688	-	724.08	7.87041	780.778	4.83537	800.475	4.50311	97%	800.475	4.50311	Xue et al. (2019)
GNW1405-37	0.0621186	0.00972397	1.13137	0.0130949	0.131975	0.000828513	0.542386	-	679.64	8.21121	768.405	5.0076	799.125	4.65327	96%	799.125	4.65327	Xue et al. (2019)
GNW1405-38	0.165819	0.00925087	11.0505	0.122466	0.482938	0.00294719	0.550658	-	2515.74	19.4915	2527.39	14.5116	2540.05	13.8013	99%	2515.74	19.4915	Xue et al. (2019)
GNW1405-39	0.151123	0.00920779	9.33089	0.100037	0.447497	0.00245745	0.512221	-	2358.95	18.2745	2371.06	13.4152	2384.12	11.8641	99%	2358.95	18.2745	Xue et al. (2019)
GNW1405-40	0.106014	0.00928015	4.69175	0.0510424	0.320803	0.00182139	0.521878	-	1731.79	37.7721	1765.77	10.1426	1793.65	9.26351	98%	1731.79	37.7721	Xue et al. (2019)
GNW1405-41	0.0697935	0.00987051	1.6715	0.0191018	0.173643	0.00100006	0.503969	-	924.07	11.0774	997.758	6.19747	1032.15	5.47485	96%	924.07	11.0774	Xue et al. (2019)
GNW1405-42	0.0696702	0.00989054	1.66999	0.0191679	0.173848	0.00101249	0.507409	-	920.37	11.0572	997.181	6.08574	1033.28	5.54266	96%	920.37	11.0572	Xue et al. (2019)
GNW1405-43	0.0555651	0.00937375	0.721846	0.00834536	0.0942087	0.000637514	0.585327	-	435.23	4.99395	551.756	3.76059	580.38	3.67869	94%	580.38	3.67869	Xue et al. (2019)
GNW1405-44	0.0712041	0.00742119	1.62555	0.0146985	0.16556	0.000855261	0.571311	-	964.81	6.33912	980.139	5.1849	987.599	4.69636	99%	987.599	4.69636	Xue et al. (2019)
GNW1405-45	0.06592	0.00791832	1.1763	0.0112584	0.129427	0.00069584	0.561727	-	805.555	9.97056	789.588	4.44415	784.598	3.92189	99%	784.598	3.92189	Xue et al. (2019)
GNW1405-46	0.163961	0.00723616	10.7611	0.0984031	0.475879	0.00266056	0.611397	-	2498.15	16.6893	2502.71	12.4872	2509.29	12.0669	99%	2498.15	16.6893	Xue et al. (2019)
GNW1405-47	0.0674372	0.00796344	1.2927	0.0123363	0.139041	0.000731162	0.551042	-	851.54	9.87254	842.494	4.6549	839.237	4.09067	99%	839.237	4.09067	Xue et al. (2019)
GNW1405-48	0.070514	0.00722391	1.62056	0.0168126	0.166622	0.00124071	0.717742	-	942.59	7.15867	978.206	6.33049	993.471	6.83285	98%	993.471	6.83285	Xue et al. (2019)
GNW1405-49	0.0594129	0.00818348	0.740992	0.00747011	0.0904519	0.000532529	0.583999	-	583.36	10.004	562.984	3.64683	558.209	3.09838	99%	558.209	3.09838	Xue et al. (2019)
GNW1405-50	0.076793	0.00740937	2.01001	0.0188763	0.189815	0.00109526	0.614425	-	1116.66	8.69365	1118.9	6.13256	1120.37	5.92033	99%	1116.66	8.69365	Xue et al. (2019)
GNW1405-51	0.0709706	0.00754468	1.56448	0.0140525	0.159887	0.00077932	0.54265	-	966.665	8.70176	956.243	4.90019	956.149	4.29157	99%	956.149	4.29157	Xue et al. (2019)
GNW1405-52	0.167605	0.0071981	11.2568	0.101742	0.486916	0.00266145	0.604759	-	2600	17.1263	2544.63	12.7593	2557.32	12.0196	99%	2600	17.1263	Xue et al. (2019)
GNW1405-53	0.0712925	0.00724218	1.61677	0.0148199	0.164428	0.000923917	0.613	-	964.81	7.52835	976.737	5.4957	981.337	5.08311	99%	981.337	5.08311	Xue et al. (2019)
GNW1405-54	0.0711752	0.00727342	1.62214	0.0152031	0.16527	0.000976868	0.630663	-	962.65	6.25921	978.819	5.50164	985.996	5.37441	99%	985.996	5.37441	Xue et al. (2019)
GNW1405-55	0.0714858	0.0073652	1.71116	0.0159719	0.173545	0.000995069	0.614293	-	972.225	7.92967	1012.72	5.86719	1031.62	5.44051	98%	972.225	7.92967	Xue et al. (2019)
GNW1405-56	0.089746	0.00734113	2.87362	0.0370199	0.232024	0.00245629	0.821752	-	1420.37	10.0059	1375.02	10.5148	1345.1	12.8658	97%	1420.37	10.0059	Xue et al. (2019)
GNW1405-57	0.0716596	0.0072942	1.6317	0.0157925	0.165112	0.00105038	0.657285	-	975.93	10.4724	982.514	5.77534	985.123	5.78388	99%	985.123	5.78388	Xue et al. (2019)
GNW1405-58	0.0592494	0.00829709	0.833305	0.0111511	0.101988	0.00107077	0.784579	-	575.96	11.7214	615.445	5.75212	626.046	6.23595	98%	626.046	6.23595	Xue et al. (2019)
GNW1405-59	0.156238	0.00731852	8.48831	0.0841488	0.393916	0.00263414	0.674541	-	2416.66	16.1393	2284.67	12.0843	2140.97	12.4132	93%	2416.66	16.1393	Xue et al. (2019)
GNW1405-60	0.161986	0.00727702	10.118	0.0948762	0.452933	0.00267853	0.630668	-	2476.23	16.4496	2445.62	12.3428	2408.28	12.2591	98%	2476.23	16.4496	Xue et al. (2019)
GNW1405-61	0.129475	0.00728497	6.93478	0.0608095	0.388367	0.00189547	0.556591	-	2091.05	14.01	2103.12	10.3654	2115.25	9.10304	99%	2091.05	14.01	Xue et al. (2019)
GNW1405-62	0.179436	0.00724388	12.3393	0.115781	0.498555	0.00297332	0.635602	-	2647.84	17.366	2630.57	13.2821	2607.58	13.2578	99%	2647.84	17.366	Xue et al. (2019)
GNW1405-63	0.0671815	0.0085888	1.17237	0.0125452	0.126605	0.000808073	0.596466	-	842.59	11.7009	787.753	4.86789	768.471	4.58124	97%	768.471	4.58124	Xue et al. (2019)
GNW1405-64	0.160328	0.0072169	10.4481	0.0939953	0.472468	0.00253781	0.597059	-	2458.94	16.1499	2475.32	12.2618	2494.38	11.5661	99%	2458.94	16.1499	Xue et al. (2019)
GNW1405-65	0.072184	0.00780392	1.64032	0.0168427	0.164849	0.00110004	0.64989	-	990.74	9.81541	985.835	5.63376	983.67	6.06122	99%	983.67	6.06122	Xue et al. (2019)
GNW1405-66	0.169657	0.00799493	11.1945	0.114905	0.479911	0.00308941	0.627159	-	2554.01	17.8228	2539.45	12.7297	2526.88	13.8544	99%	2554.01	17.8228	Xue et al. (2019)
GNW1405-67	0.100577	0.00723539	3.80983	0.0335004	0.274614	0.00137221	0.568268	-	1635.18	11.2551	1594.82	8.09852	1564.18	7.0269	98%	1635.18	11.2551	Xue et al. (2019)
GNW1405-68	0.0958535	0.00721559	3.59182	0.0399102	0.2716	0.00229496	0.760459	-	1546.3	10.7112	1547.72	9.7217	1548.92	11.6833	99%	1546.3	10.7112	Xue et al. (2019)
GNW1405-69	0.245886	0.00717658	21.6823	0.201302	0.63925	0.00376518	0.634414	-	3158.34	20.7372	3169.6	15.5641	3186.07	15.6121	99%	3158.34	20.7372	Xue et al. (2019)
GNW1405-70	0.0748496	0.00720676	1.8551	0.0166331	0.179662	0.000958361	0.594933	-	1064.82	36.7673	1065.24	5.74225	1065.13	5.2141	99%	1064.82	36.7673	Xue et al. (2019)
GNW1405-71	0.0717641	0.00742385	1.61491	0.0154596	0.16316	0.000986131	0.631353	-	988.89	7.41788	976.017	5.48144	974.312	5.43504	99%	974.312	5.43504	Xue et al. (2019)
GNW1405-72	0.066301	0.00725022	1.20294	0.0110172	0.131523	0.000735986	0.610998	-	816.665	6.47343	801.943	4.52525	796.549	4.14587	99%	796.549	4.14587	Xue et al. (2019)
GNW1405-73	0.0721962	0.00765019	1.69393	0.0161138	0.17007	0.000961545	0.594346	-	990.74	9.24632	1006.25	5.83029	1012.5	5.26942	99%	990.74	9.24632	Xue et al. (2019)
GNW1405-74	0.183209	0.00726967	13.1146	0.120026	0.518772	0.00288433	0.607502	-	2683.34	17.9327	2687.93	13.4785	2693.97	12.7896	99%	2683.34	17.9327	Xue et al. (2019)
GNW1405-75	0.182483	0.00728355	13.3165	0.134747	0.528845	0.00371475	0.694179	-	2675.62	17.6635	2702.35	14.1283	2736.58	16.1192	98%	2675.62	17.6635	Xue et al. (2019)
GNW1405-76	0.0794864	0.00729132	2.32571	0.0226397	0.212085	0.00136786	0.66255	-	1184.26	7.69925	1220.17	6.94359	1239.91	7.27947	98%	1184.26	7.69925	Xue et al. (2019)
GNW1405-77	0.067514	0.00739522	1.42687	0.0147526	0.153196	0.00110691	0.698851	-	853.7	6.67087	900.241	5.71606	918.851	6.1582	97%	918.851	6.1582	Xue et al. (2019)
GNW1405-78	0.100687	0.0077657	4.01507	0.0390489	0.289147	0.00169296	0.60202	-	1636.72	12.0742	1637.25	8.45694	1637.26	8.55928	99%	1636.72	12.0742	Xue et al. (2019)
GNW1405-79	0.0737199	0.00829496	1.67455	0.0165476	0.164796	0.000885053	0.543483	-	1035.19	8.16921	998.917	5.52954	983.377	4.86516	98%	983.377	4.86516	Xue et al. (2019)
GNW1405-80	0.165338	0.00735552	10.474	0.112336	0.459126	0.00358371	0.727774	-	2510.8	16.7344	2477.62	13.3789	2435.7	16.1285	98%	2510.8	16.7344	Xue et al. (2019)
																		Xue et al. (2019)
Laohutang Fm, late Ediacaran, N24°57'46.8", 115°41'44.1"																		Xue et al. (2019)
GNW1436-01	0.0751864	0.0105323	1.84631	0.0264893	0.17804	0.0017345	0.679034	0.983697	1073.77	15.7144	1062.12	8.10226	1056.26	9.45199	99%	1073.77	15.7144	Xue et al. (2019)
GNW1436-02	0.0751893	0.00897857	1.95067	0.0252121	0.188186	0.00174958	0.719322	0.163609	1073.77	28.2838	1098.68	6.92934	1111.54	9.463	98%	1073.77	28.2838	Xue et al. (2019)
GNW1436-03	0.0870264	0.0091528	2.9236	0.0390817	0.243746	0.00237475	0.728828	0.542674	1361.11	13.0713	1388.04	8.41158	1406.14	12.3642	98%	1361.11	13.0713	Xue et al. (2019)
GNW1436-04	0.076227	0.00884543	1.92966	0.0234224	0.183573	0.0015259	0.6848	0.175417	1101.85	9.83899	1091.42	6.47879	1086.46	8.27183	99%	1101.85	9.83899	Xue et al. (2019)
GNW1436-05	0.0786701	0.00922541	2.19832	0.0282458	0.202646	0.00181233	0.696045	1.30762	1164.82	9.78466	1180.51	7.46469	1189.52	9.70424	99%	1164.82	9.78466	Xue et al. (2019)
GNW1436-06	0.0686492	0.0149217	1.42932	0.0275454	0.151251	0.00184468	0.632848	1.04899	887.96	30.6776	901.264	9.54206	907.974	10.2782	99%	907.974	10.2782	Xue et al. (2019)
GNW1436-07	0.0732252	0.00899765	1.88819	0.026064	0.187014	0.00195771	0.758366	0.591986	1020.37	9.41324	1076.95	7.63051	1105.18	10.6047	97%	1020.37	9.41324	Xue et al. (2019)
GNW1436-08	0.0757897	0.00899513	1.97801	0.0245392	0.189308	0.00161741	0.688682	0.447059	1100	10.2806	1108.04	6.50061	1117.63	8.73657	99%	1100	10.2806	Xue et al. (2019)
GNW1436-09	0.0756127	0.00890054	2.06303	0.02908	0.19787	0.00216278	0.775431	0.312334	1084.88	13.2319	1136.62	8.2209	1163.87	11.6251	97%	1084.88	13.2319	Xue et al. (2019)
GNW1436-10	0.0643408	0.00930435	0.924262	0.0121586	0.104118	0.000968251	0.706924	0.349965	753.71	9.68262	664.611	5.32245	638.498	5.56536	95%	638.498	5.56536	Xue et al. (2019)
GNW1436-11	0.165967	0.00884609	11.2401	0.154358	0.490982	0.0051573	0.764891	0.609692	2517.59	21.0564	2543.25	14.4009	2574.92	22.9857	98%	2517.59	21.0564	Xue et al. (2019)
GNW1436-12	0.0785074	0.00914189	2.28411	0.0288908	0.211001	0.00184445	0.6911	1.09952	1161.12	11.3352	1207.39	7.32789	1234.15	9.82112	97%	1161.12	11.3352	Xue et al. (2019)
GNW1436-13	0.0782813	0.00931209	2.69247	0.0339014	0.2494	0.00211364	0.673079	0.9179	1153.71	11.8041	1326.39	7.98847	1435.38	10.9814	92%	1153.71	11.8041	Xue et al. (2019)
GNW1436-14	0.0756126	0.00894252	2.01469	0.0254657	0.193251	0.00172634	0.706737	0.228193	1084.88	13.5754	1120.47	6.82145	1138.96	9.30275	98%	1084.88	13.5754	Xue et al. (2019)
GNW1436-15	0.082148	0.00893124	2.48312	0.0308851	0.219186	0.00189741	0.695981	0.438914	1249.99	10.3827	1267.13	7.55139	1277.57	10.0491	99%	1249.99	10.3827	Xue et al. (2019)
GNW1436-16	0.25896	0.00886406	24.7194	0.324717	0.692132	0.00670994	0.738013	0.677051	3240.43	26.9083	3297.2	16.8272	3390.74	27.1008	97%	3240.43	26.9083	Xue et al. (2019)
GNW1436-17	0.0892372	0.0128917	2.58353	0.0409639	0.209159	0.00193074	0.582183	1.32809	1409.26	21.8822	1295.98	12.9067	1224.33	10.2931	94%	1409.26	21.8822	Xue et al. (2019)
GNW1436-18	0.0785177	0.00894106	2.24975	0.0304011	0.207761	0.00210507	0.749805	0.295156	1161.12	9.65051	1196.71	8.12746	1216.88	11.2337	98%	1161.12	9.65051	Xue et al. (2019)
GNW1436-19	0.078861	0.00899791	2.27919	0.0296758	0.209581	0.00197235	0.72279	0.446616	1168.52	10.6528	1205.87	7.68195	1226.58	10.512	98%	1168.52	10.6528	Xue et al. (2019)
GNW1436-20	0.0743043	0.00910273	1.84062	0.0230993	0.179621	0.00155179	0.6884	0.465086	1050.01	10.3111	1060.08	6.60842	1064.91	8.43767	99%	1050.01	10.3111	Xue et al. (2019)
GNW1436-21	0.0671043	0.00926276	1.33551	0.018323	0.144378	0.00146126	0.737694	2.854	842.59	9.41269	861.279	6.17561	869.371	8.16528	99%	869.371	8.16528	Xue et al. (2019)
GNW1436-22	0.0720723	0.00911483	1.68027	0.0228495	0.169081	0.00170635	0.742118	0.664316	987.04	9.87626	1001.08	7.06103	1007.05	9.362	99%	987.04	9.87626	Xue et al. (2019)
GNW1436-23	0.0848668	0.0111983	2.24944	0.0328026	0.192098	0.00179435	0.640545	0.807693	1322.22	18.2894	1196.61	9.28625	1132.73	9.67904	94%	1322.22	18.2894	Xue et al. (2019)
GNW1436-24	0.0713921	0.00894811	1.6237	0.0219019	0.164932	0.00166476	0.748291	0.41734	968.515	9.03282	979.424	6.95613	984.128	9.16159	99%	984.128	9.16159	Xue et al. (2019)
GNW1436-25	0.0736623	0.00901312	1.81328	0.0237764	0.17852	0.00170014	0.726301	0.444974	1031.48	10.1851	1050.26	7.00809	1058.89	9.25981	99%	1031.48	10.1851	Xue et al. (2019)
GNW1436-26	0.0709083	0.0102449	1.39863	0.0203532	0.143126	0.0014792	0.710194	1.27177	954.625	14.0106	888.357	6.88325	862.317	8.27611	97%	862.317	8.27611	Xue et al. (2019)
GNW1436-27	0.0619665	0.0107595	0.923738	0.0135084	0.108046	0.00107006	0.677243	3.54494	672.235	15.106	664.335	6.32912	661.39	6.14349	99%	661.39	6.14349	Xue et al. (2019)
GNW1436-28	0.0740267	0.00891523	1.84134	0.0238408	0.180417	0.00169397	0.725173	0.519253	1042.6	11.993	1060.34	6.79718	1069.25	9.21274	99%	1042.6	11.993	Xue et al. (2019)
GNW1436-29	0.0795371	0.00904487	2.29382	0.0317554	0.209193	0.00219247	0.757058	1.38664	1187.04	11.0624	1210.39	8.18684	1224.51	11.6883	98%	1187.04	11.0624	Xue et al. (2019)
GNW1436-30	0.106088	0.00965349	4.41125	0.0616406	0.301985	0.00305092	0.723004	1.35932	1733.02	16.6627	1714.45	9.87596	1701.15	15.2757	99%	1733.02	16.6627	Xue et al. (2019)
GNW1436-31	0.0780063	0.00896363	2.22926	0.0277166	0.207247	0.00178565	0.69299	1.0475	1147.22	10.4932	1190.28	7.15116	1214.13	9.53159	98%	1147.22	10.4932	Xue et al. (2019)
GNW1436-32	0.0781826	0.00915909	2.17353	0.028658	0.201661	0.00191265	0.719338	0.988557	1151.55	13.9462	1172.61	7.46374	1184.24	10.2496	99%	1151.55	13.9462	Xue et al. (2019)
GNW1436-33	0.118137	0.00922801	5.07101	0.0714328	0.311308	0.00331325	0.755546	2.53797	1928.09	18.927	1831.27	11.4477	1747.14	16.4696	95%	1928.09	18.927	Xue et al. (2019)
GNW1436-34	0.072066	0.0091035	1.62053	0.0236153	0.163104	0.00185599	0.780864	0.0732775	987.04	9.87626	978.198	7.60683	974.002	10.2403	99%	974.002	10.2403	Xue et al. (2019)
GNW1436-35	0.0805617	0.00898765	2.42782	0.0299754	0.21854	0.00185002	0.68564	0.648126	1210.8	11.4543	1250.87	7.34582	1274.16	9.80291	98%	1210.8	11.4543	Xue et al. (2019)
GNW1436-36	0.0874489	0.00909633	3.05855	0.0398516	0.253626	0.00236603	0.715971	0.755263	1372.22	12.641	1422.38	8.74012	1457.15	12.2439	97%	1372.22	12.641	Xue et al. (2019)
GNW1436-37	0.0777827	0.00901108	2.0684	0.0254622	0.192819	0.00161715	0.681297	0.582962	1142.6	10.7374	1138.4	6.84259	1136.63	8.71381	99%	1142.6	10.7374	Xue et al. (2019)
GNW1436-38	0.0772702	0.00911378	2.22023	0.02917	0.208353	0.00197171	0.720284	0.709451	1127.79	13.8145	1187.44	7.73065	1220.04	10.5174	97%	1127.79	13.8145	Xue et al. (2019)
GNW1436-39	0.161954	0.0089758	10.4306	0.129904	0.467035	0.00403218	0.693234	0.788327	2476.23	20.875	2473.77	12.7263	2470.55	18.4556	99%	2476.23	20.875	Xue et al. (2019)
GNW1436-40	0.0846779	0.00907917	2.67689	0.0345054	0.229248	0.00209764	0.709852	0.559624	1309.26	12.0359	1322.1	8.0443	1330.56	11.0332	99%	1309.26	12.0359	Xue et al. (2019)
GNW1436-41	0.0730919	0.00922452	1.79346	0.0253934	0.177971	0.00191171	0.75865	0.565093	1016.66	14.6849	1043.08	7.58186	1055.88	10.4259	98%	1016.66	14.6849	Xue et al. (2019)
GNW1436-42	0.0756715	0.00920359	1.99373	0.0255029	0.191084	0.00169751	0.694486	0.469343	1087.04	11.6512	1113.39	6.90243	1127.25	9.16055	98%	1087.04	11.6512	Xue et al. (2019)
GNW1436-43	0.0831701	0.00935623	2.46176	0.0351976	0.214545	0.00231954	0.756162	0.398	1273.14	12.4511	1260.88	8.99365	1252.99	12.3183	99%	1273.14	12.4511	Xue et al. (2019)
GNW1436-44	0.156944	0.00888745	10.0194	0.123927	0.462904	0.00398201	0.695483	0.406336	2433.33	20.5576	2436.57	12.6154	2452.37	18.2713	99%	2433.33	20.5576	Xue et al. (2019)
GNW1436-45	0.0722751	0.00894102	1.62516	0.019496	0.163055	0.00130414	0.666718	0.163061	994.445	9.02295	979.987	5.76068	973.731	7.16222	99%	973.731	7.16222	Xue et al. (2019)
GNW1436-46	0.0801209	0.00918271	2.31198	0.0288617	0.209352	0.00177043	0.677432	0.962888	1199.69	11.374	1215.97	6.81575	1225.36	9.4373	99%	1199.69	11.374	Xue et al. (2019)
GNW1436-47	0.0830854	0.0088619	2.44887	0.0275498	0.213729	0.00148121	0.616029	0.836735	1272.21	10.5658	1257.09	6.43108	1248.65	7.87614	99%	1272.21	10.5658	Xue et al. (2019)
GNW1436-48	0.0758835	0.00925642	1.93995	0.0249039	0.185342	0.00164858	0.692883	0.422881	1092.28	10.6075	1094.98	7.25499	1096.09	8.93147	99%	1092.28	10.6075	Xue et al. (2019)
GNW1436-49	0.0724557	0.00906204	1.64703	0.0213174	0.16488	0.0015237	0.713995	0.768646	998.15	9.95239	988.412	6.3492	983.841	8.3766	99%	983.841	8.3766	Xue et al. (2019)
GNW1436-50	0.074914	0.00886357	1.90543	0.0250258	0.184433	0.00178755	0.737946	0.332307	1066.36	9.56663	1082.99	7.24283	1091.15	9.69645	99%	1066.36	9.56663	Xue et al. (2019)
GNW1436-51	0.0757246	0.00889132	1.95916	0.0250396	0.187616	0.00172252	0.718352	0.182482	1087.04	9.91089	1101.6	6.98883	1108.45	9.31953	99%	1087.04	9.91089	Xue et al. (2019)
GNW1436-52	0.0909451	0.00888219	3.22458	0.0409514	0.257086	0.00233354	0.714732	0.67707	1455.56	12.5991	1463.09	8.74418	1474.91	12.053	99%	1455.56	12.5991	Xue et al. (2019)
GNW1436-53	0.119019	0.00892604	6.15417	0.0763147	0.374975	0.00322779	0.694168	1.06999	1942.6	16.4924	1997.96	10.6582	2052.77	15.5464	97%	1942.6	16.4924	Xue et al. (2019)
GNW1436-54	0.0776865	0.00896638	2.18783	0.0280905	0.204205	0.00187664	0.715762	1.46764	1138.89	9.43359	1177.17	7.46668	1197.87	10.0385	98%	1138.89	9.43359	Xue et al. (2019)
GNW1436-55	0.0743801	0.00896845	1.56757	0.0180757	0.152824	0.00110765	0.628554	0.165894	1051.55	8.74867	957.464	5.1863	916.774	6.1092	95%	916.774	6.1092	Xue et al. (2019)
GNW1436-56	0.152556	0.00884914	9.38217	0.120986	0.445934	0.0041828	0.727385	0.2927	2375.93	21.4106	2376.09	12.7655	2377.15	19.2557	99%	2375.93	21.4106	Xue et al. (2019)
GNW1436-57	0.1424	0.00889319	7.1657	0.0927016	0.36476	0.00342707	0.72625	0.662146	2257.41	19.0701	2132.25	12.0682	2004.7	16.5372	93%	2257.41	19.0701	Xue et al. (2019)
GNW1436-58	0.0717536	0.00898382	1.7148	0.0230943	0.17331	0.00173889	0.744999	0.276826	988.89	8.98004	1014.08	6.9828	1030.32	9.51067	98%	988.89	8.98004	Xue et al. (2019)
GNW1436-59	0.0853654	0.00890963	2.90663	0.0397859	0.24686	0.0025652	0.759156	0.835321	1324.07	11.563	1383.64	9.20923	1422.26	13.32	97%	1324.07	11.563	Xue et al. (2019)
GNW1436-60	0.0721009	0.00908998	1.81019	0.0235841	0.182028	0.00169896	0.716391	0.458792	988.58	9.88679	1049.15	6.97415	1078.05	9.22901	97%	988.58	9.88679	Xue et al. (2019)
GNW1436-61	0.0748379	0.00920085	1.90904	0.0253136	0.185018	0.00176659	0.720083	2.41851	1064.82	11.5099	1084.25	7.03131	1094.33	9.57783	99%	1064.82	11.5099	Xue et al. (2019)
GNW1436-62	0.0710205	0.00927227	1.59567	0.0206463	0.162962	0.00147065	0.697467	0.997435	966.665	10.592	968.517	6.16376	973.217	8.09326	99%	973.217	8.09326	Xue et al. (2019)
GNW1436-63	0.0736472	0.00905741	1.91849	0.0249023	0.188902	0.00175635	0.716301	0.649989	1031.48	10.1851	1087.54	6.99802	1115.43	9.49489	97%	1031.48	10.1851	Xue et al. (2019)
GNW1436-64	0.0765209	0.00922707	1.77222	0.0255039	0.167664	0.0018516	0.767395	0.151226	1109.26	11.7936	1035.33	9.05427	999.228	10.1782	96%	999.228	10.1782	Xue et al. (2019)
GNW1436-65	0.102992	0.00896362	3.72808	0.0441894	0.262468	0.00203561	0.654312	0.467684	1679.63	14.3813	1577.42	8.38564	1502.46	10.5084	95%	1679.63	14.3813	Xue et al. (2019)
GNW1436-66	0.0933929	0.00934911	3.53742	0.0473759	0.27462	0.00263351	0.71603	0.799584	1495.99	12.4541	1535.62	9.65731	1564.21	13.4366	98%	1495.99	12.4541	Xue et al. (2019)
GNW1436-67	0.0771211	0.00896727	1.94754	0.0247727	0.183109	0.00165192	0.709235	0.134641	1124.08	10.1918	1097.6	6.91212	1083.94	8.96425	98%	1124.08	10.1918	Xue et al. (2019)
GNW1436-68	0.0857433	0.00903366	2.7789	0.0351645	0.235001	0.00208237	0.700257	0.481863	1332.4	12.3438	1349.88	8.10547	1360.65	10.9139	99%	1332.4	12.3438	Xue et al. (2019)
GNW1436-69	0.0848779	0.0148761	2.48308	0.0443262	0.211028	0.00208234	0.552767	1.09203	1322.22	21.1081	1267.11	15.2305	1234.29	11.0869	97%	1322.22	21.1081	Xue et al. (2019)
GNW1436-70	0.0754554	0.00885126	2.092	0.0253008	0.201023	0.00165672	0.681446	0.437375	1080.56	9.67599	1146.18	6.74002	1180.82	8.8787	97%	1080.56	9.67599	Xue et al. (2019)
GNW1436-71	0.0885683	0.00893938	2.93232	0.0426844	0.239897	0.002756	0.789217	0.357697	1394.75	12.2685	1390.29	10.5426	1386.16	14.3704	99%	1394.75	12.2685	Xue et al. (2019)
GNW1436-72	0.0746146	0.00890533	1.88975	0.0233394	0.183684	0.00157188	0.692885	0.239333	1057.41	9.689	1077.49	6.37979	1087.07	8.52275	99%	1057.41	9.689	Xue et al. (2019)
GNW1436-73	0.146354	0.00881871	8.92551	0.106533	0.44221	0.00355682	0.673877	0.580432	2305.55	19.2142	2330.41	11.808	2360.53	16.5881	98%	2305.55	19.2142	Xue et al. (2019)
GNW1436-74	0.0735705	0.00906225	1.82859	0.0238933	0.180271	0.00169695	0.720412	1.02417	1031.48	8.58389	1055.77	6.82816	1068.46	9.23007	98%	1031.48	8.58389	Xue et al. (2019)
GNW1436-75	0.0787205	0.00921139	2.21345	0.0309515	0.20394	0.0021456	0.752373	1.25072	1164.82	11.7014	1185.3	8.25183	1196.45	11.4815	99%	1164.82	11.7014	Xue et al. (2019)
GNW1436-76	0.068291	0.00897109	1.39604	0.0179379	0.148259	0.00136383	0.71592	0.139982	877.47	9.1425	887.257	5.87412	891.195	7.58661	99%	891.195	7.58661	Xue et al. (2019)
GNW1436-77	0.0738665	0.00948505	1.79646	0.0255151	0.176506	0.00186594	0.744322	1.02586	1038.89	14.791	1044.18	7.1778	1047.86	10.1862	99%	1038.89	14.791	Xue et al. (2019)
GNW1436-78	0.135937	0.00883811	7.46149	0.095043	0.398054	0.00365125	0.72012	0.599957	2176.24	18.2667	2168.38	11.7276	2160.07	17.2963	99%	2176.24	18.2667	Xue et al. (2019)
GNW1436-79	0.0922987	0.00887108	3.80462	0.0472927	0.298881	0.00260245	0.70049	0.370386	1473.77	12.7432	1593.72	9.15028	1685.76	13.1049	94%	1473.77	12.7432	Xue et al. (2019)
GNW1436-80	0.0794515	0.00898398	2.36524	0.0293778	0.215866	0.00185143	0.690525	0.467034	1183.34	9.80083	1232.17	7.43321	1259.99	9.82707	97%	1183.34	9.80083	Xue et al. (2019)
																		Xue et al. (2019)
Bali Fm, early Ediacaran, N24°55'10.6", 115°40'57.7"																		Xue et al. (2019)
GNW1433-01	0.240347	0.00708807	20.0086	0.204039	0.603586	0.00442517	0.71894	-	3124.08	14.5558	3091.77	19.8166	3044.27	20.39	98%	3124.08	14.5558	Xue et al. (2019)
GNW1433-02	0.0865989	0.00702335	2.8832	0.0300457	0.241394	0.0018584	0.738765	-	1351.54	11.3991	1377.53	9.19855	1393.94	9.89487	98%	1351.54	11.3991	Xue et al. (2019)
GNW1433-03	0.0779067	0.00712384	2.1948	0.0250539	0.20425	0.00182179	0.781367	-	1146.3	7.50314	1179.39	8.62139	1198.11	9.84815	98%	1146.3	7.50314	Xue et al. (2019)
GNW1433-04	0.180502	0.00694487	12.482	0.134623	0.501453	0.00413794	0.765099	-	2657.72	12.1768	2641.37	17.1949	2620.04	19.3939	99%	2657.72	12.1768	Xue et al. (2019)
GNW1433-05	0.0735212	0.00750885	1.69154	0.0187733	0.166884	0.00136386	0.736373	-	1027.78	8.68093	1005.34	7.25302	994.92	7.53972	98%	994.92	7.53972	Xue et al. (2019)
GNW1433-06	0.179263	0.00693786	12.6629	0.139057	0.512184	0.00435985	0.775149	-	2645.99	12.1273	2654.91	17.4614	2665.95	20.238	99%	2645.99	12.1273	Xue et al. (2019)
GNW1433-07	0.115548	0.00716989	5.36772	0.0584476	0.336849	0.00276045	0.752606	-	1888.58	9.9102	1879.72	12.553	1871.49	13.9655	99%	1888.58	9.9102	Xue et al. (2019)
GNW1433-08	0.0800897	0.00700922	2.31295	0.0275644	0.20939	0.00201815	0.808752	-	1199.08	6.91655	1216.27	9.13138	1225.57	10.8598	99%	1199.08	6.91655	Xue et al. (2019)
GNW1433-09	0.069447	0.00722479	1.48659	0.016166	0.155243	0.00126174	0.747395	-	922.22	7.25781	924.927	6.37717	930.285	7.02077	99%	930.285	7.02077	Xue et al. (2019)
GNW1433-10	0.0754429	0.00706021	1.93885	0.0205864	0.186322	0.00147763	0.7469	-	1079.63	6.52623	1094.6	7.55415	1101.42	8.0843	99%	1079.63	6.52623	Xue et al. (2019)
GNW1433-11	0.0971804	0.00708246	3.80281	0.0401879	0.2837	0.00222519	0.742195	-	1572.22	8.41142	1593.34	10.6879	1609.97	11.5932	98%	1572.22	8.41142	Xue et al. (2019)
GNW1433-12	0.0614048	0.00878665	0.868467	0.0103705	0.102589	0.000829555	0.677169	-	653.72	11.4763	634.734	4.92306	629.564	4.75708	99%	629.564	4.75708	Xue et al. (2019)
GNW1433-13	0.137165	0.00721943	7.81227	0.0842552	0.413	0.00330905	0.742905	-	2191.66	11.207	2209.62	14.5001	2228.62	16.1963	99%	2191.66	11.207	Xue et al. (2019)
GNW1433-14	0.075745	0.00734293	2.01006	0.022163	0.1924	0.00158254	0.745984	-	1088.58	7.33483	1118.91	7.93016	1134.37	8.62519	98%	1088.58	7.33483	Xue et al. (2019)
GNW1433-15	0.131235	0.00718606	6.87543	0.0744268	0.379832	0.00307505	0.747877	-	2114.5	10.7574	2095.49	13.9425	2075.5	15.2614	99%	2114.5	10.7574	Xue et al. (2019)
GNW1433-16	0.0754025	0.00728002	1.93173	0.0204192	0.185754	0.00142359	0.725031	-	1079.63	8.41422	1092.14	7.40398	1098.33	7.79467	99%	1079.63	8.41422	Xue et al. (2019)
GNW1433-17	0.0811161	0.00817606	2.24877	0.0248994	0.201007	0.00150085	0.674346	-	1233.33	10.7308	1196.4	8.39444	1180.73	8.15962	98%	1233.33	10.7308	Xue et al. (2019)
GNW1433-18	0.0791186	0.00773255	2.13184	0.0437147	0.195202	0.00370722	0.926175	-	1175.93	9.03561	1159.18	14.9716	1149.49	20.0289	99%	1175.93	9.03561	Xue et al. (2019)
GNW1433-19	0.0839868	0.00738787	2.69614	0.0307004	0.232747	0.0020167	0.76095	-	1292.28	7.94915	1327.4	9.45146	1348.88	10.7339	98%	1292.28	7.94915	Xue et al. (2019)
GNW1433-20	0.0924543	0.00768531	2.84627	0.0302138	0.223196	0.00163435	0.689811	-	1476.86	9.85379	1367.83	9.22592	1298.74	8.79787	94%	1476.86	9.85379	Xue et al. (2019)
GNW1433-21	0.0755316	0.00736044	2.00087	0.0221483	0.192068	0.00158795	0.746896	-	1083.34	12.9446	1115.81	7.88074	1132.57	8.65554	98%	1083.34	12.9446	Xue et al. (2019)
GNW1433-22	0.179833	0.0073627	10.7109	0.126909	0.431918	0.00400965	0.783496	-	2651.55	12.7926	2498.37	16.8227	2314.36	19.1109	92%	2651.55	12.7926	Xue et al. (2019)
GNW1433-23	0.0700399	0.00763493	1.4971	0.0167485	0.154999	0.00126743	0.73092	-	929.32	9.42113	929.208	6.64543	928.926	7.05365	99%	928.926	7.05365	Xue et al. (2019)
GNW1433-24	0.161445	0.00722529	10.4979	0.110546	0.471426	0.00361133	0.727466	-	2472.22	11.9459	2479.73	16.1543	2489.81	17.3536	99%	2472.22	11.9459	Xue et al. (2019)
GNW1433-25	0.115344	0.00740744	4.31796	0.0565736	0.27111	0.00292987	0.824837	-	1887.04	10.1655	1696.8	13.7191	1546.43	15.124	90%	1887.04	10.1655	Xue et al. (2019)
GNW1433-26	0.138545	0.00712641	7.85235	0.0869641	0.410901	0.00348341	0.765469	-	2208.95	10.4569	2214.23	14.8546	2219.04	16.9468	99%	2208.95	10.4569	Xue et al. (2019)
GNW1433-27	0.071048	0.00745284	1.05952	0.010974	0.108131	0.000777749	0.694436	-	958.95	6.97576	733.585	4.91378	661.882	4.42449	89%	661.882	4.42449	Xue et al. (2019)
GNW1433-28	0.0731342	0.00733922	1.38372	0.0177839	0.137037	0.00144582	0.820918	-	1017.59	11.128	882.026	8.13893	827.884	8.15645	93%	827.884	8.15645	Xue et al. (2019)
GNW1433-29	0.0779065	0.00806429	2.08424	0.0236176	0.194096	0.00154511	0.702515	-	1146.3	6.84661	1143.63	7.72177	1143.53	8.4182	99%	1146.3	6.84661	Xue et al. (2019)
GNW1433-30	0.07598	0.00738242	1.99728	0.0222595	0.190634	0.00159163	0.749147	-	1094.44	8.44914	1114.59	7.76016	1124.81	8.68126	99%	1094.44	8.44914	Xue et al. (2019)
GNW1433-31	0.0755868	0.0071416	1.96552	0.0220548	0.188555	0.0016319	0.771312	-	1084.26	11.247	1103.78	7.8614	1113.54	8.9071	99%	1084.26	11.247	Xue et al. (2019)
GNW1433-32	0.0756966	0.00715924	1.9927	0.0213295	0.19088	0.00151887	0.743398	-	1087.04	6.54829	1113.04	7.61165	1126.14	8.28942	98%	1087.04	6.54829	Xue et al. (2019)
GNW1433-33	0.0796055	0.00741809	2.28434	0.0244469	0.208073	0.00160505	0.720791	-	1187.04	8.68979	1207.46	8.20267	1218.54	8.68802	99%	1187.04	8.68979	Xue et al. (2019)
GNW1433-34	0.069462	0.00733032	1.49671	0.0160898	0.156242	0.00122859	0.731463	-	922.22	8.4461	929.047	6.42648	935.86	6.83126	99%	935.86	6.83126	Xue et al. (2019)
GNW1433-35	0.0754289	0.00718629	1.99177	0.0216497	0.191458	0.00156135	0.750265	-	1079.63	7.30918	1112.72	7.76211	1129.27	8.51527	98%	1079.63	7.30918	Xue et al. (2019)
GNW1433-36	0.0960693	0.00796412	3.62173	0.0408612	0.273478	0.00218547	0.708313	-	1550.01	13.8331	1554.32	10.3924	1558.43	11.4292	99%	1550.01	13.8331	Xue et al. (2019)
GNW1433-37	0.0712078	0.00722513	1.62435	0.017396	0.165406	0.00130755	0.73814	-	964.81	4.34477	979.676	6.74821	986.75	7.23455	99%	986.75	7.23455	Xue et al. (2019)
GNW1433-38	0.0735295	0.00752781	1.79892	0.0203489	0.177413	0.00149793	0.746409	-	1027.78	8.28964	1045.07	7.4817	1052.83	8.23055	99%	1027.78	8.28964	Xue et al. (2019)
GNW1433-39	0.069815	0.00737962	1.53876	0.0171459	0.159816	0.00133425	0.749252	-	924.07	7.52123	946.008	6.79916	955.754	7.40579	98%	955.754	7.40579	Xue et al. (2019)
GNW1433-40	0.200672	0.00764859	15.6513	0.176516	0.565798	0.0046894	0.734891	-	2831.79	13.9061	2855.75	18.4939	2890.55	21.3689	98%	2831.79	13.9061	Xue et al. (2019)
GNW1433-41	0.0726175	0.0099215	1.54123	0.0203929	0.153623	0.00134488	0.661628	-	1003.39	15.7538	946.994	9.35401	921.239	7.49363	97%	921.239	7.49363	Xue et al. (2019)
GNW1433-42	0.0728403	0.0079112	1.62769	0.0179391	0.162038	0.00124337	0.696232	-	1009.26	5.68531	980.967	6.87773	968.094	6.8916	98%	968.094	6.8916	Xue et al. (2019)
GNW1433-43	0.0897734	0.00991827	2.28265	0.0469239	0.18527	0.00333594	0.875906	-	1420.68	15.657	1206.94	10.9525	1095.7	18.1664	90%	1420.68	15.657	Xue et al. (2019)
GNW1433-44	0.17786	0.00710148	13.0302	0.134626	0.531109	0.00398561	0.726333	-	2633.03	12.6562	2681.84	17.3524	2746.12	18.7727	97%	2633.03	12.6562	Xue et al. (2019)
GNW1433-45	0.0694397	0.00780541	1.52573	0.0163046	0.159301	0.00116274	0.683015	-	922.22	9.40987	940.784	6.54157	952.893	6.45269	98%	952.893	6.45269	Xue et al. (2019)
GNW1433-46	0.0763379	0.00720052	1.9159	0.0206905	0.181973	0.00146461	0.745278	-	1105.56	7.38382	1086.64	7.47884	1077.74	8.0304	99%	1105.56	7.38382	Xue et al. (2019)
GNW1433-47	0.0714689	0.00759093	1.61071	0.0181549	0.163494	0.00136223	0.739215	-	972.225	12.7774	974.383	6.64606	976.164	7.5451	99%	976.164	7.5451	Xue et al. (2019)
GNW1433-48	0.0691471	0.00723458	1.46245	0.0163748	0.153377	0.00131072	0.76323	-	903.39	6.83066	915.019	6.49569	919.864	7.30336	99%	919.864	7.30336	Xue et al. (2019)
GNW1433-49	0.073847	0.00775836	1.67432	0.0189025	0.164436	0.00134862	0.726461	-	1038.89	13.8935	998.827	7.02639	981.38	7.46571	98%	981.38	7.46571	Xue et al. (2019)
GNW1433-50	0.075884	0.00748679	1.95222	0.0209279	0.186508	0.00143099	0.715717	-	1092.28	8.19275	1099.21	7.60442	1102.43	7.832	99%	1092.28	8.19275	Xue et al. (2019)
GNW1433-51	0.0829703	0.00778851	2.44426	0.0270038	0.21357	0.00167341	0.709227	-	1277.78	9.42341	1255.73	8.84414	1247.81	9.02863	99%	1277.78	9.42341	Xue et al. (2019)
GNW1433-52	0.075669	0.00707708	1.9641	0.0206032	0.188189	0.00145714	0.738132	-	1087.04	10.5603	1103.29	7.43056	1111.56	7.96715	99%	1087.04	10.5603	Xue et al. (2019)
GNW1433-53	0.0749479	0.00709482	1.77217	0.0190414	0.171417	0.0013832	0.750994	-	1133.34	7.12745	1035.32	7.2256	1019.92	7.62773	98%	1133.34	7.12745	Xue et al. (2019)
GNW1433-54	0.0877183	0.00742116	2.89964	0.0320001	0.23967	0.00195764	0.740137	-	1376.24	8.98471	1381.82	9.51681	1384.98	10.4042	99%	1376.24	8.98471	Xue et al. (2019)
GNW1433-55	0.0773653	0.00975999	1.94203	0.0244996	0.182156	0.00145601	0.633607	-	1131.49	15.6315	1095.7	8.02804	1078.74	7.98305	98%	1131.49	15.6315	Xue et al. (2019)
GNW1433-56	0.0734079	0.00758747	1.68683	0.0183666	0.166611	0.0013011	0.717217	-	1024.99	8.67456	1003.56	6.95925	993.411	7.1943	98%	993.411	7.1943	Xue et al. (2019)
GNW1433-57	0.0708753	0.00811869	1.52319	0.0176648	0.155885	0.00129096	0.714091	-	953.7	11.159	939.762	6.67884	933.868	7.18146	99%	933.868	7.18146	Xue et al. (2019)
GNW1433-58	0.141378	0.00730972	8.09716	0.093603	0.415043	0.00371692	0.774699	-	2244.14	11.3308	2241.93	15.5552	2237.94	17.9348	99%	2244.14	11.3308	Xue et al. (2019)
GNW1433-59	0.0758937	0.00736487	1.90923	0.0211914	0.182318	0.00151396	0.748145	-	1092.28	7.34547	1084.32	7.96386	1079.62	8.29673	99%	1092.28	7.34547	Xue et al. (2019)
GNW1433-60	0.0694302	0.00740905	1.50808	0.0172645	0.157482	0.00137436	0.762326	-	922.22	7.51683	933.662	6.86653	942.766	7.63999	99%	942.766	7.63999	Xue et al. (2019)
GNW1433-61	0.062283	0.00730813	0.986286	0.011283	0.114806	0.00101044	0.769349	-	683.345	12.4049	696.824	5.31246	700.599	5.76726	99%	700.599	5.76726	Xue et al. (2019)
GNW1433-62	0.118692	0.00714545	5.94559	0.0655897	0.363118	0.00305192	0.761876	-	1936.73	10.0885	1967.92	13.3095	1996.94	15.207	98%	1936.73	10.0885	Xue et al. (2019)
GNW1433-63	0.0762371	0.00798373	1.90369	0.0209762	0.18105	0.00137493	0.689208	-	1101.85	10.1809	1082.38	7.54926	1072.71	7.54708	99%	1101.85	10.1809	Xue et al. (2019)
GNW1433-64	0.0833665	0.00709233	2.59462	0.0302298	0.225576	0.00208512	0.793373	-	1279.63	7.5951	1299.12	9.65664	1311.27	11.1216	99%	1279.63	7.5951	Xue et al. (2019)
GNW1433-65	0.0762605	0.0072252	1.96251	0.0212831	0.186573	0.0015089	0.745743	-	1101.85	8.21752	1102.74	7.64492	1102.78	8.25213	99%	1101.85	8.21752	Xue et al. (2019)
GNW1433-66	0.20157	0.00698914	15.7542	0.171526	0.566554	0.0047297	0.766759	-	2839.19	12.9455	2862.01	18.772	2893.66	21.5173	98%	2839.19	12.9455	Xue et al. (2019)
GNW1433-67	0.0755323	0.00715492	1.95254	0.021167	0.187445	0.00152661	0.751264	-	1083.34	7.08925	1099.32	7.49667	1107.52	8.3442	99%	1083.34	7.08925	Xue et al. (2019)
GNW1433-68	0.0751526	0.00735912	1.86216	0.0202216	0.179649	0.00143457	0.735356	-	1072.22	8.1413	1067.75	7.41792	1065.06	7.8762	99%	1072.22	8.1413	Xue et al. (2019)
GNW1433-69	0.0721092	0.00700634	1.6736	0.0177813	0.168257	0.00134387	0.75175	-	990.74	6.70348	998.556	6.90864	1002.5	7.42387	99%	990.74	6.70348	Xue et al. (2019)
GNW1433-70	0.133953	0.00716514	7.18694	0.0799181	0.388884	0.00330695	0.764728	-	2150.3	10.4663	2134.88	14.5339	2117.65	16.2531	99%	2150.3	10.4663	Xue et al. (2019)
GNW1433-71	0.0609543	0.00710762	0.871502	0.00963247	0.103671	0.000877501	0.765812	-	638.905	6.22581	636.382	4.63585	635.885	5.03734	99%	635.885	5.03734	Xue et al. (2019)
GNW1433-72	0.112213	0.00702607	5.10385	0.0542393	0.329768	0.00262927	0.750258	-	1835.5	9.15901	1836.75	12.1331	1837.26	13.3809	99%	1835.5	9.15901	Xue et al. (2019)
GNW1433-73	0.0710238	0.00744142	1.57049	0.0185003	0.160335	0.00146417	0.775211	-	966.665	8.14394	958.621	7.23134	958.638	8.12612	99%	958.638	8.12612	Xue et al. (2019)
GNW1433-74	0.0749514	0.00799725	1.72879	0.0194538	0.167325	0.00132462	0.703508	-	1133.34	10.5173	1019.3	6.89841	997.356	7.3214	97%	997.356	7.3214	Xue et al. (2019)
GNW1433-75	0.102846	0.00787029	4.19681	0.0480957	0.296031	0.00246598	0.726885	-	1676.23	7.93794	1673.4	11.1844	1671.6	12.7152	99%	1676.23	7.93794	Xue et al. (2019)
GNW1433-76	0.0939156	0.00695336	3.40271	0.0344926	0.262679	0.00193752	0.727646	-	1506.48	7.59369	1505.02	9.78128	1503.54	10.238	99%	1506.48	7.59369	Xue et al. (2019)
GNW1433-77	0.0804731	0.00739144	2.0266	0.0221024	0.182574	0.00146412	0.735307	-	1209.26	25.5599	1124.48	7.9146	1081.02	8.02541	96%	1209.26	25.5599	Xue et al. (2019)
GNW1433-78	0.190521	0.00722825	12.2424	0.13003	0.46587	0.0036255	0.732705	-	2746.61	13.0548	2623.17	17.062	2465.42	17.4165	93%	2746.61	13.0548	Xue et al. (2019)
GNW1433-79	0.0668233	0.00847225	1.21104	0.0149301	0.131351	0.00117637	0.726453	-	831.48	11.6969	805.669	6.88256	795.567	6.64721	98%	795.567	6.64721	Xue et al. (2019)
GNW1433-80	0.109363	0.00792693	4.78248	0.0545575	0.316984	0.00260045	0.719135	-	1788.58	11.5764	1781.83	12.5788	1774.98	13.2835	99%	1788.58	11.5764	Xue et al. (2019)
																		Xue et al. (2019)
Bali Fm , early Ediacaran, N25°16'58.3", 115°22'50.4"																		Xue et al. (2019)
GNW1403-01	0.076584	0.00851281	2.16778	0.0280945	0.205312	0.00200634	0.754021	-	1110.18	8.20859	1170.77	7.45103	1203.79	10.7993	97%	1110.18	8.20859	Xue et al. (2019)
GNW1403-02	0.0613356	0.00896565	0.924036	0.012672	0.109314	0.00113436	0.756692	-	650.015	8.43064	664.492	4.70867	668.761	6.44467	99%	668.761	6.44467	Xue et al. (2019)
GNW1403-03	0.0770042	0.00878269	2.01204	0.0278225	0.189597	0.00202504	0.7724	-	1121.3	8.90193	1119.58	7.52735	1119.19	10.9858	99%	1121.3	8.90193	Xue et al. (2019)
GNW1403-04	0.0768493	0.0088698	2.08887	0.0293585	0.197227	0.00215025	0.775709	-	1116.66	9.59108	1145.15	7.911	1160.41	11.6132	98%	1116.66	9.59108	Xue et al. (2019)
GNW1403-05	0.114189	0.009939	2.84857	0.0393764	0.180994	0.00173883	0.695001	-	1933.34	15.434	1368.43	8.95813	1072.4	9.47693	75%	1933.34	15.434	Xue et al. (2019)
GNW1403-06	0.0722196	0.00870302	1.75416	0.0236888	0.176243	0.00181986	0.764636	-	992.28	8.28896	1028.7	6.73841	1046.41	9.94681	98%	992.28	8.28896	Xue et al. (2019)
GNW1403-07	0.0717062	0.00841843	1.69755	0.0226482	0.171729	0.00177747	0.775794	-	977.47	6.60241	1007.61	6.70475	1021.63	9.73981	98%	977.47	6.60241	Xue et al. (2019)
GNW1403-08	0.0777229	0.00855596	2.14984	0.0298287	0.200646	0.00219162	0.787237	-	1139.82	7.06858	1165	8.08977	1178.79	11.8132	98%	1139.82	7.06858	Xue et al. (2019)
GNW1403-09	0.076279	0.00844775	2.0024	0.0266065	0.190799	0.00195686	0.771875	-	1101.85	7.7703	1116.32	7.28614	1125.7	10.61	99%	1101.85	7.7703	Xue et al. (2019)
GNW1403-10	0.0766424	0.00889783	2.01369	0.028504	0.190666	0.00209903	0.777734	-	1122.22	10.1628	1120.13	7.85758	1124.98	11.3794	99%	1122.22	10.1628	Xue et al. (2019)
GNW1403-11	0.081423	0.00847099	2.46365	0.0320247	0.219473	0.00216393	0.758501	-	1231.48	8.48554	1261.43	7.92634	1279.09	11.562	98%	1231.48	8.48554	Xue et al. (2019)
GNW1403-12	0.086349	0.0104897	2.54606	0.0365922	0.214043	0.0021029	0.683592	-	1346.29	22.4448	1285.31	8.3994	1250.32	11.2678	97%	1346.29	22.4448	Xue et al. (2019)
GNW1403-13	0.0761335	0.00846728	2.01989	0.0284567	0.192474	0.00216722	0.799235	-	1098.15	7.75013	1122.22	7.88046	1134.77	11.7357	98%	1098.15	7.75013	Xue et al. (2019)
GNW1403-14	0.0777289	0.00936567	1.97502	0.0269567	0.184393	0.00183074	0.727423	-	1139.82	11.6466	1107.02	7.12653	1090.93	9.96082	98%	1139.82	11.6466	Xue et al. (2019)
GNW1403-15	0.0829009	0.00900619	2.38315	0.0321067	0.20862	0.00209029	0.743717	-	1277.78	10.139	1237.56	7.7049	1221.46	11.2281	98%	1277.78	10.139	Xue et al. (2019)
GNW1403-16	0.0771684	0.00858931	2.15502	0.030316	0.202602	0.00225718	0.791959	-	1125.62	8.92288	1166.67	8.08191	1189.28	12.1509	98%	1125.62	8.92288	Xue et al. (2019)
GNW1403-17	0.0707277	0.00857218	1.52048	0.0201793	0.155956	0.00158012	0.763421	-	949.995	6.95836	938.67	6.1054	934.262	8.73261	99%	934.262	8.73261	Xue et al. (2019)
GNW1403-18	0.0830989	0.008807	2.43384	0.0327806	0.212508	0.00216551	0.756592	-	1272.21	9.83076	1252.66	7.94398	1242.16	11.6054	99%	1272.21	9.83076	Xue et al. (2019)
GNW1403-19	0.165764	0.00840893	11.1172	0.147571	0.486424	0.00499601	0.773756	-	2516.66	15.849	2533	15.2891	2555.19	23.4623	99%	2516.66	15.849	Xue et al. (2019)
GNW1403-20	0.0823361	0.00903584	2.12519	0.0300624	0.187351	0.00203908	0.769401	-	1253.7	8.25428	1157.02	7.62379	1107.01	11.076	95%	1253.7	8.25428	Xue et al. (2019)
GNW1403-21	0.0832218	0.00848739	2.45395	0.0329654	0.213873	0.00222702	0.775129	-	1275.92	8.73643	1258.59	8.20716	1249.42	11.9222	99%	1275.92	8.73643	Xue et al. (2019)
GNW1403-22	0.0832153	0.00987266	1.9255	0.0280688	0.167935	0.00180115	0.735747	-	1275.92	12.7781	1089.98	7.64272	1000.72	9.89414	91%	1275.92	12.7781	Xue et al. (2019)
GNW1403-23	0.0732579	0.00865162	1.75265	0.0252442	0.173414	0.00199696	0.799502	-	1020.37	8.41903	1028.14	8.11178	1030.89	10.9396	99%	1020.37	8.41903	Xue et al. (2019)
GNW1403-24	0.080419	0.00929324	2.22951	0.0306397	0.201103	0.00203602	0.736694	-	1207.1	11.5483	1190.36	7.91559	1181.25	10.9788	99%	1207.1	11.5483	Xue et al. (2019)
GNW1403-25	0.0798736	0.0086055	2.27915	0.0308878	0.206985	0.00216704	0.772526	-	1194.44	8.28066	1205.85	7.82622	1212.74	11.644	99%	1194.44	8.28066	Xue et al. (2019)
GNW1403-26	0.0781448	0.00843768	2.26565	0.0306475	0.210247	0.00222292	0.781612	-	1150.01	7.8327	1201.66	8.01945	1230.13	11.9213	97%	1150.01	7.8327	Xue et al. (2019)
GNW1403-27	0.0645636	0.00900207	1.05315	0.0143647	0.118331	0.00121257	0.751278	-	761.115	8.78078	730.442	4.96933	720.951	6.84873	98%	720.951	6.84873	Xue et al. (2019)
GNW1403-28	0.0764723	0.00859133	1.72768	0.0225969	0.163869	0.00161607	0.754012	-	1109.26	11.9111	1018.89	6.33568	978.24	8.88897	95%	978.24	8.88897	Xue et al. (2019)
GNW1403-29	0.0761917	0.00845521	2.0664	0.0298204	0.19664	0.00229965	0.810382	-	1101.85	7.7703	1137.74	8.46634	1157.25	12.4196	98%	1101.85	7.7703	Xue et al. (2019)
GNW1403-30	0.076402	0.00850711	2.06042	0.0282563	0.195534	0.00210322	0.784341	-	1105.56	7.79169	1135.76	7.84033	1151.28	11.3712	98%	1105.56	7.79169	Xue et al. (2019)
GNW1403-31	0.130486	0.00835761	7.04132	0.0919197	0.391266	0.00392371	0.768193	-	2105.55	13.2861	2116.66	12.7846	2128.7	19.2812	99%	2105.55	13.2861	Xue et al. (2019)
GNW1403-32	0.0619955	0.00864802	0.962373	0.0128384	0.112557	0.0011433	0.761417	-	673.78	27.173	684.525	4.73861	687.579	6.4767	99%	687.579	6.4767	Xue et al. (2019)
GNW1403-33	0.0625279	0.00884431	0.951316	0.0126042	0.110312	0.00108824	0.74458	-	700.01	7.04941	678.788	4.64609	674.557	6.16397	99%	674.557	6.16397	Xue et al. (2019)
GNW1403-34	0.104592	0.00845332	4.49875	0.0592006	0.311849	0.00314505	0.766386	-	1707.1	10.9041	1730.74	10.7027	1749.8	16.0331	98%	1707.1	10.9041	Xue et al. (2019)
GNW1403-35	0.0614935	0.00845228	0.926327	0.0123271	0.109225	0.00112269	0.77239	-	657.42	5.50657	665.7	4.52861	668.248	6.37587	99%	668.248	6.37587	Xue et al. (2019)
GNW1403-36	0.079772	0.00854658	2.618	0.0332004	0.237898	0.00222887	0.738789	-	1190.74	8.63297	1305.7	8.01284	1375.76	11.8189	94%	1190.74	8.63297	Xue et al. (2019)
GNW1403-37	0.0618046	0.00857994	0.974407	0.01329	0.114315	0.001212	0.777349	-	733.34	7.17848	690.733	4.88209	697.758	6.87158	98%	697.758	6.87158	Xue et al. (2019)
GNW1403-38	0.184426	0.00836409	13.9189	0.18132	0.547069	0.00546361	0.766651	-	2694.45	16.8446	2744.2	16.3209	2812.97	25.1277	97%	2694.45	16.8446	Xue et al. (2019)
GNW1403-39	0.0697109	0.00861925	1.38468	0.0181437	0.144106	0.00142222	0.753195	-	920.37	7.44701	882.433	5.75237	867.837	7.90667	98%	867.837	7.90667	Xue et al. (2019)
GNW1403-40	0.184643	0.00838787	14.1905	0.188273	0.557033	0.00572608	0.774796	-	2694.75	16.8894	2762.52	16.6289	2854.36	26.0938	96%	2694.75	16.8894	Xue et al. (2019)
GNW1403-41	0.0746178	0.00860599	1.93831	0.0266606	0.188351	0.00202092	0.780076	-	1057.41	8.59293	1094.42	7.30284	1112.43	10.9712	98%	1057.41	8.59293	Xue et al. (2019)
GNW1403-42	0.0739597	0.00940719	1.73016	0.0237621	0.169564	0.00169672	0.728585	-	1040.44	11.2854	1019.81	7.16276	1009.71	9.30563	99%	1040.44	11.2854	Xue et al. (2019)
GNW1403-43	0.253454	0.00859543	23.7996	0.40818	0.683987	0.0101513	0.865349	-	3206.48	20.2225	3260.22	22.8655	3359.64	41.3954	96%	3206.48	20.2225	Xue et al. (2019)
GNW1403-44	0.0625547	0.00846802	1.02069	0.0134347	0.118288	0.00119194	0.765568	-	694.455	4.40386	714.262	4.79234	720.7	6.72757	99%	720.7	6.72757	Xue et al. (2019)
GNW1403-45	0.0733445	0.00888945	1.96902	0.0260208	0.194596	0.00190285	0.739941	-	1033.34	9.79559	1104.97	7.29633	1146.23	10.2985	96%	1033.34	9.79559	Xue et al. (2019)
GNW1403-46	0.167351	0.00846691	11.2271	0.145312	0.486398	0.00476157	0.75635	-	2531.17	15.9936	2542.16	14.9844	2555.07	22.5267	99%	2531.17	15.9936	Xue et al. (2019)
GNW1403-47	0.0763438	0.0107954	1.81141	0.0265585	0.171708	0.00170352	0.676658	-	1105.56	11.3967	1049.59	9.25647	1021.52	9.33136	97%	1105.56	11.3967	Xue et al. (2019)
GNW1403-48	0.0732242	0.00851337	1.80889	0.0239034	0.179102	0.00181011	0.764815	-	1020.37	10.4639	1048.68	6.86145	1062.07	9.87699	98%	1020.37	10.4639	Xue et al. (2019)
GNW1403-49	0.213913	0.00843474	16.866	0.21502	0.571695	0.00546516	0.749845	-	2935.49	18.4108	2927.25	17.0178	2914.77	25.1005	99%	2935.49	18.4108	Xue et al. (2019)
GNW1403-50	0.127103	0.00854414	6.78059	0.0875025	0.386878	0.0037416	0.749427	-	2058.32	13.2879	2083.19	12.2721	2108.33	18.4982	98%	2058.32	13.2879	Xue et al. (2019)
GNW1403-51	0.0734171	0.00873955	1.77258	0.0233541	0.175094	0.00172632	0.748326	-	1025.61	8.44511	1035.46	6.57263	1040.12	9.4388	99%	1025.61	8.44511	Xue et al. (2019)
GNW1403-52	0.0768472	0.00908129	1.97787	0.0262336	0.186687	0.00180472	0.728845	-	1116.66	10.1392	1107.99	6.9155	1103.4	9.80757	99%	1116.66	10.1392	Xue et al. (2019)
GNW1403-53	0.0715758	0.00846958	1.70953	0.0227604	0.173186	0.00177905	0.771566	-	973.77	11.1845	1012.11	6.7356	1029.64	9.73998	98%	973.77	11.1845	Xue et al. (2019)
GNW1403-54	0.0732449	0.00871364	1.71358	0.0230607	0.169717	0.00174058	0.762077	-	1020.37	8.41903	1013.62	6.47383	1010.55	9.54762	99%	1020.37	8.41903	Xue et al. (2019)
GNW1403-55	0.0716667	0.00863239	1.61931	0.0215365	0.163961	0.00165889	0.760734	-	975.93	8.214	977.725	6.34711	978.75	9.12717	99%	978.75	9.12717	Xue et al. (2019)
GNW1403-56	0.193189	0.00836219	14.2157	0.185537	0.533543	0.00534652	0.767787	-	2769.44	17.2543	2764.21	16.4773	2756.36	24.7107	99%	2769.44	17.2543	Xue et al. (2019)
GNW1403-57	0.184225	0.00836921	13.8985	0.183306	0.54704	0.00557615	0.77287	-	2691.05	16.9962	2742.81	16.4489	2812.85	25.5534	97%	2691.05	16.9962	Xue et al. (2019)
GNW1403-58	0.128464	0.00847553	6.92142	0.0919096	0.390782	0.00399472	0.769816	-	2076.84	13.3165	2101.41	12.7563	2126.45	19.5936	98%	2076.84	13.3165	Xue et al. (2019)
GNW1403-59	0.0776876	0.0083991	2.13208	0.0281592	0.19902	0.00202854	0.771738	-	1138.89	7.12148	1159.26	7.55425	1170.05	10.9501	99%	1138.89	7.12148	Xue et al. (2019)
GNW1403-60	0.0607188	0.00862897	0.896433	0.0116987	0.107069	0.00104823	0.750199	-	627.795	4.00073	649.82	4.36181	655.701	5.94578	99%	655.701	5.94578	Xue et al. (2019)
GNW1403-61	0.0701935	0.00870008	1.5609	0.0213452	0.161308	0.00170188	0.771518	-	1000	8.32454	954.826	6.52631	964.044	9.38303	99%	964.044	9.38303	Xue et al. (2019)
GNW1403-62	0.0726944	0.00880018	1.73443	0.0235961	0.173088	0.00179579	0.762612	-	1005.55	9.33095	1021.4	6.76678	1029.11	9.83287	99%	1005.55	9.33095	Xue et al. (2019)
GNW1403-63	0.0774775	0.0137633	1.94225	0.0340124	0.183179	0.0019834	0.618303	-	1144.45	17.9725	1095.77	10.6164	1084.32	10.7996	98%	1144.45	17.9725	Xue et al. (2019)
GNW1403-64	0.0775565	0.00965748	1.87084	0.0262616	0.17486	0.00178134	0.725725	-	1144.45	12.5405	1070.83	8.00101	1038.84	9.74296	96%	1144.45	12.5405	Xue et al. (2019)
GNW1403-65	0.0897609	0.0225021	2.48616	0.0631706	0.199254	0.00235146	0.464455	-	1420.37	37.1707	1268.01	21.9821	1171.31	12.6785	92%	1420.37	37.1707	Xue et al. (2019)
GNW1403-66	0.173571	0.00838567	12.512	0.162915	0.522728	0.00520687	0.765006	-	2592.28	16.2608	2643.63	15.7019	2710.74	24.1973	97%	2592.28	16.2608	Xue et al. (2019)
GNW1403-67	0.0812341	0.00843929	2.46159	0.0325104	0.219742	0.00223235	0.769208	-	1227.78	7.6682	1260.83	8.05578	1280.51	11.9185	98%	1227.78	7.6682	Xue et al. (2019)
GNW1403-68	0.0724585	0.00856617	1.82946	0.0259245	0.183104	0.00206694	0.796603	-	998.15	7.63552	1056.09	7.57714	1083.91	11.2556	97%	998.15	7.63552	Xue et al. (2019)
GNW1403-69	0.234414	0.0083291	20.911	0.278339	0.64676	0.00671508	0.780026	-	3082.41	19.2005	3134.48	18.6801	3215.53	29.4544	97%	3082.41	19.2005	Xue et al. (2019)
GNW1403-70	0.0764886	0.00880994	2.04426	0.0280158	0.193688	0.00203327	0.765996	-	1109.26	9.13833	1130.38	8.20789	1141.32	11.0057	99%	1109.26	9.13833	Xue et al. (2019)
GNW1403-71	0.0731915	0.008805	1.72631	0.0238506	0.170872	0.00181923	0.770609	-	1020.37	8.94582	1018.38	7.95622	1016.92	9.97576	99%	1020.37	8.94582	Xue et al. (2019)
GNW1403-72	0.0735301	0.00846238	1.86372	0.0255646	0.183728	0.00198345	0.787021	-	1027.78	6.38897	1068.3	7.57704	1087.31	10.7964	98%	1027.78	6.38897	Xue et al. (2019)
GNW1403-73	0.0762338	0.00888661	1.98264	0.0265061	0.188609	0.00188384	0.747101	-	1101.85	10.0767	1109.62	7.07719	1113.83	10.2268	99%	1101.85	10.0767	Xue et al. (2019)
GNW1403-74	0.0776285	0.00915519	2.03869	0.0277272	0.190538	0.00191636	0.739505	-	1138.89	11.0388	1128.52	6.95026	1124.29	10.3925	99%	1138.89	11.0388	Xue et al. (2019)
GNW1403-75	0.064645	0.00931505	1.07652	0.0146014	0.120807	0.00119104	0.726874	-	762.66	10.3952	741.932	4.72414	735.209	6.70662	99%	735.209	6.70662	Xue et al. (2019)
GNW1403-76	0.137888	0.00840596	7.97397	0.102953	0.419232	0.00410843	0.759026	-	2211.11	13.9869	2228.08	13.2516	2256.99	19.995	98%	2211.11	13.9869	Xue et al. (2019)
GNW1403-77	0.0733969	0.00866669	1.7408	0.022909	0.171981	0.00170317	0.752526	-	1033.34	8.48123	1023.76	6.39785	1023.02	9.32795	99%	1033.34	8.48123	Xue et al. (2019)
GNW1403-78	0.0774544	0.0086591	2.09944	0.0284805	0.19655	0.0020525	0.769781	-	1133.03	8.95576	1148.62	7.42964	1156.76	11.0925	99%	1133.03	8.95576	Xue et al. (2019)
GNW1403-79	0.0727869	0.00877304	1.72132	0.0232805	0.171485	0.00176516	0.761076	-	1009.26	6.4094	1016.52	6.57898	1020.29	9.67327	99%	1009.26	6.4094	Xue et al. (2019)
GNW1403-80	0.0788721	0.00866277	2.22651	0.0295982	0.204645	0.00206351	0.758518	-	1168.52	9.12938	1189.42	7.61774	1200.22	11.1066	99%	1168.52	9.12938	Xue et al. (2019)
J198-1 N25°20'19.5" E114°18'42.5"				Late Ediacaran
J198-1-01	0.06499	0.00127	1.14674	0.02409	0.12806	0.00196	-	0.43	774	42	776	11	777	11	100	777	11	Wu et al. (2010)
J198-1-02	0.06182	0.00147	0.91602	0.02267	0.10748	0.00171	-	0.93	668	52	660	12	658	10	99	658	10	Wu et al. (2010)
J198-1-03	0.07704	0.00197	2.03146	0.05315	0.19133	0.00315	-	1.3	1122	52	1126	18	1129	17	101	1122	52	Wu et al. (2010)
J198-1-04	0.07104	0.00126	1.56	0.03064	0.15928	0.00238	-	0.32	959	37	954	12	953	13	99	953	13	Wu et al. (2010)
J198-1-05	0.07329	0.00141	1.7182	0.03591	0.17003	0.00256	-	0.5	1022	40	1015	13	1012	14	99	1022	40	Wu et al. (2010)
J198-1-06	0.0726	0.00179	1.66718	0.04226	0.16657	0.00267	-	0.71	1003	51	996	16	993	15	99	993	15	Wu et al. (2010)
J198-1-07	0.07267	0.00144	1.71323	0.03527	0.17103	0.00238	-	1.33	1005	41	1013	13	1018	13	101	1005	41	Wu et al. (2010)
J198-1-08	0.07446	0.00116	1.80856	0.03185	0.17618	0.00248	-	1.33	1054	32	1049	12	1046	14	99	1054	32	Wu et al. (2010)
J198-1-09	0.08011	0.00228	2.16254	0.06159	0.19593	0.00304	-	1.12	1200	57	1169	20	1153	16	96	1200	57	Wu et al. (2010)
J198-1-10	0.07413	0.00285	1.67563	0.06354	0.16399	0.00305	-	1.18	1045	79	999	24	979	17	94	979	17	Wu et al. (2010)
J198-1-11	0.07322	0.00173	1.72311	0.04273	0.1707	0.00275	-	0.59	1020	49	1017	16	1016	15	100	1020	49	Wu et al. (2010)
J198-1-12	0.07281	0.00191	1.82479	0.04947	0.18177	0.0031	-	1.51	1009	54	1054	18	1077	17	107	1009	54	Wu et al. (2010)
J198-1-13	0.07315	0.00257	1.74098	0.06061	0.17264	0.00331	-	0.79	1018	73	1024	22	1027	18	101	1018	73	Wu et al. (2010)
J198-1-14	0.08903	0.00336	2.95252	0.10979	0.24064	0.00472	-	1.74	1405	74	1395	28	1390	25	99	1405	74	Wu et al. (2010)
J198-1-15	0.07987	0.00128	2.04582	0.03675	0.18581	0.00267	-	1.26	1194	32	1131	12	1099	15	92	1194	32	Wu et al. (2010)
J198-1-16	0.07298	0.00135	1.71676	0.03494	0.17065	0.00261	-	0.22	1013	38	1015	13	1016	14	100	1013	38	Wu et al. (2010)
J198-1-17	0.17397	0.0043	10.651	0.26224	0.44422	0.00649	-	0.57	2596	42	2493	23	2370	29	91	2596	42	Wu et al. (2010)
J198-1-18	0.08897	0.00297	2.97243	0.09642	0.24241	0.00409	-	0.9	1404	65	1401	25	1399	21	100	1404	65	Wu et al. (2010)
J198-1-19	0.09924	0.00287	3.45338	0.1007	0.25235	0.00415	-	0.4	1610	55	1517	23	1451	21	90	1610	55	Wu et al. (2010)
J198-1-20	0.07257	0.00142	1.67115	0.0343	0.16704	0.00237	-	0.96	1002	41	998	13	996	13	99	996	13	Wu et al. (2010)
J198-1-21	0.06819	0.00152	1.36837	0.03213	0.14556	0.00232	-	0.99	874	47	875	14	876	13	100	876	13	Wu et al. (2010)
J198-1-22	0.07461	0.00149	1.86909	0.03927	0.18171	0.00265	-	0.98	1058	41	1070	14	1076	14	102	1058	41	Wu et al. (2010)
J198-1-23	0.08046	0.00223	2.08312	0.05689	0.18781	0.00284	-	0.72	1208	56	1143	19	1110	15	92	1208	56	Wu et al. (2010)
J198-1-24	0.08871	0.00242	2.93436	0.07935	0.23994	0.00376	-	0.45	1398	54	1391	20	1386	20	99	1398	54	Wu et al. (2010)
J198-1-25	0.0733	0.00171	1.74213	0.04263	0.1724	0.00283	-	1.12	1022	48	1024	16	1025	16	100	1022	48	Wu et al. (2010)
J198-1-27	0.0724	0.00165	1.77141	0.04253	0.17746	0.00288	-	0.51	997	47	1035	16	1053	16	106	997	47	Wu et al. (2010)
J198-1-28	0.18548	0.00417	12.6376	0.28973	0.4942	0.00744	-	0.86	2702	38	2653	22	2589	32	96	2702	38	Wu et al. (2010)
J198-1-29	0.07204	0.00215	1.60977	0.04744	0.1621	0.0026	-	1.01	987	62	974	18	968	14	98	968	14	Wu et al. (2010)
J198-1-30	0.08885	0.0017	2.90273	0.06041	0.23698	0.00368	-	0.94	1401	38	1383	16	1371	19	98	1401	38	Wu et al. (2010)
J198-1-31	0.07029	0.00205	1.52528	0.04474	0.15742	0.00267	-	0.94	937	61	941	18	942	15	101	942	15	Wu et al. (2010)
J198-1-32	0.07353	0.00239	1.66098	0.05295	0.16387	0.00279	-	0.75	1029	67	994	20	978	15	95	978	15	Wu et al. (2010)
J198-1-33	0.07347	0.00205	1.74344	0.04912	0.17215	0.00289	-	0.58	1027	58	1025	18	1024	16	100	1027	58	Wu et al. (2010)
J198-1-34	0.07291	0.00171	1.78416	0.04292	0.17751	0.00268	-	0.54	1011	49	1040	16	1053	15	104	1011	49	Wu et al. (2010)
J198-1-35	0.06906	0.00165	1.38429	0.03431	0.14542	0.00235	-	0.63	901	50	882	15	875	13	97	875	13	Wu et al. (2010)
J198-1-36	0.07296	0.0017	1.71165	0.04143	0.17016	0.00269	-	0.33	1013	48	1013	16	1013	15	100	1013	48	Wu et al. (2010)
J198-1-37	0.07976	0.0023	2.15502	0.06307	0.19594	0.00343	-	0.9	1191	58	1167	20	1153	18	97	1191	58	Wu et al. (2010)
J198-1-38	0.06809	0.00146	1.36672	0.03103	0.14561	0.00226	-	0.24	871	45	875	13	876	13	101	876	13	Wu et al. (2010)
J198-1-39	0.0644	0.00165	1.07614	0.02813	0.12123	0.00199	-	0.81	755	55	742	14	738	11	98	738	11	Wu et al. (2010)
J198-1-40	0.07311	0.00169	1.68951	0.03873	0.16774	0.00262	-	0.82	1017	48	1005	15	1000	14	98	1017	48	Wu et al. (2010)
J198-1-41	0.06731	0.00127	1.31326	0.02592	0.14156	0.00205	-	0.26	847	40	852	11	853	12	101	853	12	Wu et al. (2010)
J198-1-42	0.08089	0.00225	1.8643	0.0504	0.16709	0.0024	-	0.7	1219	56	1069	18	996	13	82	996	13	Wu et al. (2010)
J198-1-43	0.06769	0.0009	1.33515	0.01948	0.14305	0.00178	-	0.9	859	28	861	8	862	10	100	862	10	Wu et al. (2010)
J198-1-44	0.09861	0.00237	3.60323	0.08833	0.26504	0.00401	-	1.19	1598	46	1550	19	1516	20	95	1598	46	Wu et al. (2010)
J198-1-45	0.07298	0.00184	1.2422	0.03132	0.12346	0.0018	-	0.61	1013	52	820	14	750	10	74	750	10	Wu et al. (2010)
J198-1-46	0.07395	0.00172	1.78584	0.0427	0.17511	0.0027	-	1.14	1040	48	1040	16	1040	15	100	1040	48	Wu et al. (2010)
J198-1-47	0.12422	0.00304	6.36124	0.15917	0.37155	0.00601	-	1.16	2018	44	2027	22	2037	28	101	2018	44	Wu et al. (2010)
J198-1-48	0.07623	0.00155	1.66243	0.03546	0.15815	0.0022	-	0.36	1101	42	994	14	946	12	86	946	12	Wu et al. (2010)
J198-1-49	0.07256	0.00176	1.56168	0.03858	0.15612	0.00231	-	0.6	1002	50	955	15	935	13	93	935	13	Wu et al. (2010)
J198-1-50	0.07241	0.00175	1.62028	0.04029	0.16226	0.00238	-	1.25	997	50	978	16	969	13	97	969	13	Wu et al. (2010)
J198-1-51	0.23594	0.00663	20.1502	0.58172	0.61932	0.01038	-	0.97	3093	46	3099	28	3107	41	100	3093	46	Wu et al. (2010)
J198-1-52	0.08023	0.00172	2.26891	0.05154	0.20511	0.00301	-	0.93	1203	43	1203	16	1203	16	100	1203	43	Wu et al. (2010)
J198-1-53	0.07319	0.0017	1.69742	0.04077	0.16825	0.00262	-	0.28	1019	48	1008	15	1002	14	98	1019	48	Wu et al. (2010)
J198-1-54	0.07254	0.00109	1.8808	0.03188	0.18805	0.00266	-	0.01	1001	31	1074	11	1111	14	111	1001	31	Wu et al. (2010)
J198-1-55	0.07252	0.00158	1.72014	0.03887	0.17203	0.00256	-	0.99	1001	45	1016	15	1023	14	102	1001	45	Wu et al. (2010)
J198-1-56	0.08066	0.0017	2.1222	0.0449	0.19083	0.00259	-	0.63	1213	42	1156	15	1126	14	93	1213	42	Wu et al. (2010)
J198-1-57	0.0725	0.00142	1.67438	0.03325	0.16751	0.00221	-	2.73	1000	41	999	13	998	12	100	998	12	Wu et al. (2010)
J198-1-58	0.07497	0.00127	1.91854	0.03514	0.1856	0.00258	-	0.42	1068	35	1088	12	1097	14	103	1068	35	Wu et al. (2010)
J198-1-59	0.1656	0.00246	9.86941	0.16352	0.43226	0.00597	-	0.51	2514	26	2423	15	2316	27	92	2514	26	Wu et al. (2010)
J198-1-60	0.07438	0.00155	1.99196	0.04367	0.1942	0.00284	-	1.03	1052	43	1113	15	1144	15	109	1052	43	Wu et al. (2010)
J198-1-61	0.08891	0.00237	2.85814	0.07705	0.23317	0.00367	-	1.2	1402	52	1371	20	1351	19	96	1402	52	Wu et al. (2010)
J198-1-62	0.07326	0.00241	1.73305	0.05686	0.17159	0.00305	-	1.32	1021	68	1021	21	1021	17	100	1021	68	Wu et al. (2010)
J198-1-63	0.07699	0.00242	2.13941	0.06738	0.20142	0.00347	-	0.72	1121	64	1162	22	1183	19	106	1121	64	Wu et al. (2010)
J198-1-64	0.075	0.00227	1.8469	0.05462	0.17862	0.00278	-	0.63	1069	62	1062	19	1059	15	99	1069	62	Wu et al. (2010)
J198-1-65	0.11154	0.00267	5.0181	0.11919	0.32631	0.00485	-	1.37	1825	44	1822	20	1820	24	100	1825	44	Wu et al. (2010)
J198-1-66	0.23289	0.00612	19.4969	0.513	0.60722	0.00933	-	1.26	3072	43	3067	25	3059	37	100	3072	43	Wu et al. (2010)
J198-1-67	0.07267	0.00194	1.53422	0.03981	0.15316	0.00212	-	0.8	1005	55	944	16	919	12	91	919	12	Wu et al. (2010)
J198-1-68	0.089	0.00302	3.16127	0.10915	0.25776	0.00468	-	0.5	1404	67	1448	27	1478	24	105	1404	67	Wu et al. (2010)
J198-1-69	0.08005	0.00268	2.15656	0.07267	0.19539	0.00342	-	0.44	1198	68	1167	23	1151	18	96	1198	68	Wu et al. (2010)
J198-1-70	0.06718	0.00212	1.30451	0.04044	0.14087	0.0026	-	0.44	843	67	848	18	850	15	101	850	15	Wu et al. (2010)
J198-1-71	0.07288	0.00179	1.47513	0.03683	0.14683	0.00225	-	0.34	1011	51	920	15	883	13	87	883	13	Wu et al. (2010)
J198-1-72	0.07077	0.00232	1.56362	0.0507	0.16017	0.00282	-	0.66	951	69	956	20	958	16	101	958	16	Wu et al. (2010)
J198-1-73	0.0713	0.00159	1.58518	0.03689	0.16124	0.00253	-	0.18	966	47	964	14	964	14	100	964	14	Wu et al. (2010)
J198-1-74	0.07082	0.00125	1.55377	0.03019	0.15913	0.00242	-	0.62	952	37	952	12	952	13	100	952	13	Wu et al. (2010)
J198-1-75	0.07301	0.00158	1.70186	0.03877	0.16906	0.00264	-	0.73	1014	45	1009	15	1007	15	99	1014	45	Wu et al. (2010)
J198-1-76	0.07308	0.00213	1.8002	0.05321	0.17872	0.00314	-	1.18	1016	60	1046	19	1060	17	104	1016	60	Wu et al. (2010)
J198-1-77	0.07299	0.00136	1.75374	0.03529	0.17427	0.00258	-	1.42	1014	39	1029	13	1036	14	102	1014	39	Wu et al. (2010)
J198-1-78	0.09874	0.00278	3.79367	0.10918	0.27876	0.00489	-	0.75	1600	54	1591	23	1585	25	99	1600	54	Wu et al. (2010)
J198-1-79	0.07604	0.0019	1.96048	0.05049	0.18709	0.0031	-	1.81	1096	51	1102	17	1106	17	101	1096	51	Wu et al. (2010)
J198-1-80	0.07317	0.00344	1.47547	0.06653	0.14625	0.00303	-	0.53	1019	98	920	27	880	17	86	880	17	Wu et al. (2010)
J198-1-81	0.09763	0.00358	3.19965	0.11433	0.23765	0.00423	-	1.25	1579	70	1457	28	1374	22	87	1579	70	Wu et al. (2010)
J198-1-82	0.06737	0.00227	1.21827	0.04101	0.13122	0.00238	-	1.79	849	72	809	19	795	14	94	795	14	Wu et al. (2010)
J198-1-001a	0.08306	0.00451	2.47634	0.13046	0.21665	0.00536	-	2.27	1271	109	1265	38	1264	28	99	1271	109	Wu et al. (2010)
J198-1-002a	0.07341	0.00248	1.79311	0.06124	0.17719	0.00335	-	0.48	1025	70	1043	22	1052	18	103	1025	70	Wu et al. (2010)
J198-1-003a	0.06354	0.00218	1.039	0.03613	0.11861	0.00222	-	0.33	726	74	723	18	723	13	100	723	13	Wu et al. (2010)
J198-1-004a	0.09196	0.00523	3.11184	0.17133	0.24541	0.00625	-	0.36	1467	111	1436	42	1415	32	96	1467	111	Wu et al. (2010)
J198-1-005a	0.09413	0.00491	3.40791	0.17209	0.26263	0.00618	-	0.65	1511	101	1506	40	1503	32	99	1511	101	Wu et al. (2010)
J198-1-006a	0.0764	0.00286	1.97541	0.07417	0.18748	0.00363	-	1.24	1106	77	1107	25	1108	20	100	1106	77	Wu et al. (2010)
J198-1-007a	0.06866	0.00311	1.39904	0.06233	0.14777	0.00311	-	1.17	889	96	889	26	888	17	100	888	17	Wu et al. (2010)
J198-1-008a	0.07786	0.00525	2.11821	0.13842	0.19715	0.00551	-	1.1	1143	138	1155	45	1160	30	101	1143	138	Wu et al. (2010)
J198-1-009a	0.07722	0.00322	2.02992	0.08402	0.19061	0.00385	-	0.02	1127	85	1126	28	1125	21	100	1127	85	Wu et al. (2010)
J198-1-010a	0.07704	0.00254	2.03415	0.06811	0.19146	0.0035	-	0.43	1122	67	1127	23	1129	19	101	1122	67	Wu et al. (2010)
J198-1-011a	0.07454	0.00582	1.74259	0.13017	0.16954	0.00515	-	0.19	1056	162	1024	48	1010	28	96	1056	162	Wu et al. (2010)
J198-1-012a	0.06861	0.00365	1.02534	0.05409	0.10835	0.00254	-	1.06	887	113	717	27	663	15	75	663	15	Wu et al. (2010)
J198-1-013a	0.11564	0.00689	5.44414	0.31691	0.34124	0.00885	-	0.74	1890	110	1892	50	1893	43	100	1890	110	Wu et al. (2010)
J198-1-014a	0.08116	0.0031	2.48074	0.09393	0.22167	0.00447	-	0.06	1225	77	1266	27	1291	24	105	1225	77	Wu et al. (2010)
J198-1-015a	0.06411	0.00366	1.08198	0.05906	0.12223	0.00296	-	0.14	745	124	745	29	743	17	100	743	17	Wu et al. (2010)
J198-1-016a	0.07411	0.00245	1.91091	0.0635	0.1869	0.00348	-	0.7	1044	68	1085	22	1105	19	106	1044	68	Wu et al. (2010)
J198-1-017a	0.07626	0.00524	1.94429	0.12823	0.18503	0.00517	-	0.58	1102	141	1096	44	1094	28	99	1102	141	Wu et al. (2010)
J198-1-018a	0.07735	0.00492	2.00755	0.12259	0.18809	0.00504	-	0.99	1130	130	1118	41	1111	27	98	1130	130	Wu et al. (2010)
J198-1-019a	0.06334	0.00225	1.03272	0.03655	0.11822	0.00225	-	0.02	720	77	720	18	720	13	100	720	13	Wu et al. (2010)
J198-1-020a	0.07004	0.00268	1.49957	0.05687	0.15522	0.003	-	0.46	930	80	930	23	930	17	100	930	17	Wu et al. (2010)
J198-1-021a	0.11804	0.00424	5.70229	0.20219	0.35042	0.00659	-	0.3	1927	66	1932	31	1937	31	101	1927	66	Wu et al. (2010)
J198-1-022a	0.06204	0.00313	0.96653	0.047	0.11291	0.00256	-	0.02	675	111	687	24	690	15	102	690	15	Wu et al. (2010)
J198-1-023a	0.07075	0.00381	1.55734	0.08136	0.15962	0.00375	-	0.61	950	113	953	32	955	21	101	955	21	Wu et al. (2010)
J198-1-024a	0.07545	0.00577	1.89035	0.13805	0.18172	0.00544	-	0.68	1081	158	1078	48	1076	30	100	1081	158	Wu et al. (2010)
J198-1-025a	0.07339	0.00323	1.80109	0.07708	0.17798	0.00364	-	1.67	1025	91	1046	28	1056	20	103	1025	91	Wu et al. (2010)
J198-1-026a	0.06953	0.00452	1.46044	0.09034	0.15238	0.00404	-	0.35	915	138	914	37	914	23	100	914	23	Wu et al. (2010)
J192 N26°27'15.6" E114°12'49"				Late Cambrian
J192-001	0.08049	0.00116	2.27175	0.03689	0.20487	0.00283	-	0.19	1209	29	1204	11	1201	15	99	1209	29	Wu et al. (2010)
J192-002	0.15876	0.00185	9.59162	0.12894	0.43843	0.00555	-	1.11	2442	20	2396	12	2344	25	96	2442	20	Wu et al. (2010)
J192-003	0.06569	0.00107	0.87452	0.01494	0.0966	0.00125	-	1.59	797	35	638	8	594	7	75	594	7	Wu et al. (2010)
J192-004	0.08013	0.00147	2.07654	0.03948	0.18809	0.00249	-	0.78	1200	37	1141	13	1111	14	93	1200	37	Wu et al. (2010)
J192-005	0.07191	0.00089	1.44358	0.02064	0.14568	0.00188	-	0.09	983	26	907	9	877	11	89	877	11	Wu et al. (2010)
J192-006	0.06766	0.00101	0.63832	0.01041	0.06846	0.0009	-	0.67	858	32	501	6	427	5	50	427	5	Wu et al. (2010)
J192-007	0.0741	0.00165	1.86975	0.04433	0.18315	0.00292	-	2.16	1044	46	1070	16	1084	16	104	1044	46	Wu et al. (2010)
J192-008	0.34736	0.00674	36.7606	0.78087	0.76807	0.01198	-	0.43	3695	30	3687	21	3674	44	99	3695	30	Wu et al. (2010)
J192-009	0.06076	0.0011	0.55975	0.0109	0.06685	0.00092	-	0.59	631	40	451	7	417	6	66	417	6	Wu et al. (2010)
J192-010	0.07266	0.00169	1.57919	0.03768	0.15767	0.0023	-	0.84	1004	48	962	15	944	13	94	944	13	Wu et al. (2010)
J192-011	0.10691	0.00136	4.61344	0.06879	0.31304	0.00419	-	1.5	1747	24	1752	12	1756	21	101	1747	24	Wu et al. (2010)
J192-012	0.0889	0.00167	2.64926	0.05431	0.21613	0.00344	-	1.48	1402	37	1314	15	1261	18	90	1402	37	Wu et al. (2010)
J192-013	0.15845	0.00258	9.89175	0.18262	0.45279	0.00678	-	0.81	2439	28	2425	17	2408	30	99	2439	28	Wu et al. (2010)
J192-014	0.15738	0.00313	8.60276	0.17704	0.39653	0.00562	-	0.43	2428	35	2297	19	2153	26	89	2428	35	Wu et al. (2010)
J192-015	0.15823	0.00349	8.97134	0.16061	0.41122	0.00528	-	0.19	2437	38	2335	16	2220	24	91	2437	38	Wu et al. (2010)
J192-016	0.06149	0.0009	0.76067	0.01266	0.08972	0.00124	-	1.15	656	32	574	7	554	7	84	554	7	Wu et al. (2010)
J192-017	0.06611	0.00112	1.21674	0.02261	0.13351	0.00191	-	1.01	810	36	808	10	808	11	100	808	11	Wu et al. (2010)
J192-018	0.08548	0.00171	2.69542	0.05844	0.22871	0.00365	-	0.46	1326	40	1327	16	1328	19	100	1326	40	Wu et al. (2010)
J192-019	0.06934	0.00153	1.43278	0.03365	0.14986	0.00248	-	0.8	909	47	903	14	900	14	99	900	14	Wu et al. (2010)
J192-020	0.15159	0.00233	7.26164	0.12683	0.34749	0.00492	-	0.07	2364	27	2144	16	1923	24	81	2364	27	Wu et al. (2010)
J192-021	0.07091	0.00151	1.5658	0.03483	0.16018	0.00236	-	1.03	955	45	957	14	958	13	100	958	13	Wu et al. (2010)
J192-022	0.09909	0.00209	3.65028	0.08076	0.2672	0.00395	-	0.72	1607	40	1561	18	1527	20	95	1607	40	Wu et al. (2010)
J192-023	0.07373	0.00103	1.69837	0.02696	0.16709	0.00225	-	1.2	1034	29	1008	10	996	12	96	996	12	Wu et al. (2010)
J192-024	0.05807	0.00089	0.70245	0.01209	0.08773	0.00121	-	0.89	532	34	540	7	542	7	102	542	7	Wu et al. (2010)
J192-025	0.05955	0.00132	0.78246	0.01833	0.09532	0.00152	-	1.75	587	49	587	10	587	9	100	587	9	Wu et al. (2010)
J192-026	0.06758	0.00168	1.32074	0.03367	0.14174	0.00223	-	0.53	856	53	855	15	854	13	100	854	13	Wu et al. (2010)
J192-027	0.07643	0.00126	2.02661	0.03733	0.1923	0.00279	-	0.81	1106	34	1124	13	1134	15	103	1106	34	Wu et al. (2010)
J192-028	0.0716	0.00154	1.61033	0.03637	0.16309	0.00246	-	0.82	975	45	974	14	974	14	100	974	14	Wu et al. (2010)
J192-029	0.12647	0.00188	6.52314	0.10861	0.37408	0.00514	-	0.36	2049	27	2049	15	2049	24	100	2049	27	Wu et al. (2010)
J192-030	0.16285	0.00313	10.7035	0.22084	0.4767	0.00707	-	0.34	2485	33	2498	19	2513	31	101	2485	33	Wu et al. (2010)
J192-031	0.06683	0.00172	1.26366	0.03341	0.13714	0.00221	-	2.33	832	55	830	15	828	13	100	828	13	Wu et al. (2010)
J192-032	0.07347	0.00177	1.80003	0.04554	0.17775	0.003	-	0.03	1027	50	1045	17	1055	16	103	1027	50	Wu et al. (2010)
J192-033	0.07303	0.00213	1.11271	0.03304	0.11051	0.0019	-	0.15	1015	60	759	16	676	11	67	676	11	Wu et al. (2010)
J192-034	0.06512	0.0029	1.09203	0.04806	0.12165	0.00251	-	0.36	778	96	749	23	740	14	95	740	14	Wu et al. (2010)
J192-035	0.05775	0.00096	0.67189	0.01235	0.0844	0.0012	-	1.45	520	37	522	8	522	7	100	522	7	Wu et al. (2010)
J192-036	0.08043	0.00211	2.13418	0.05737	0.19246	0.00345	-	0.31	1208	53	1160	19	1135	19	94	1208	53	Wu et al. (2010)
J192-037	0.09897	0.0015	3.98558	0.07044	0.2921	0.00435	-	0.15	1605	29	1631	14	1652	22	103	1605	29	Wu et al. (2010)
J192-038	0.06162	0.00094	0.62371	0.01091	0.07342	0.00106	-	1.47	661	33	492	7	457	6	69	457	6	Wu et al. (2010)
J192-039	0.06198	0.00111	0.95164	0.01862	0.11139	0.00162	-	0.23	673	39	679	10	681	9	101	681	9	Wu et al. (2010)
J192-040	0.08031	0.00224	2.22421	0.06299	0.20089	0.00365	-	0.98	1205	56	1189	20	1180	20	98	1205	56	Wu et al. (2010)
J192-041	0.05764	0.00332	0.65109	0.03619	0.08195	0.0019	-	2.42	516	130	509	22	508	11	98	508	11	Wu et al. (2010)
J192-042	0.07254	0.0024	1.64544	0.05402	0.16457	0.00284	-	0.12	1001	69	988	21	982	16	98	982	16	Wu et al. (2010)
J192-043	0.08893	0.00126	2.99344	0.04997	0.24416	0.00359	-	1.04	1403	28	1406	13	1408	19	100	1403	28	Wu et al. (2010)
J192-044	0.07736	0.00216	2.05596	0.05833	0.19279	0.00342	-	1.11	1130	57	1134	19	1136	18	101	1130	57	Wu et al. (2010)
J192-045	0.07171	0.00186	1.61562	0.04242	0.16348	0.00257	-	0.16	978	54	976	16	976	14	100	976	14	Wu et al. (2010)
J192-046	0.11422	0.00353	5.00459	0.15545	0.31783	0.00574	-	0.41	1868	57	1820	26	1779	28	95	1868	57	Wu et al. (2010)
J192-047	0.07478	0.00256	1.87304	0.06329	0.18174	0.00336	-	0.87	1063	71	1072	22	1076	18	101	1063	71	Wu et al. (2010)
J192-048	0.07086	0.00165	1.55883	0.03825	0.15957	0.00266	-	1.02	953	49	954	15	954	15	100	954	15	Wu et al. (2010)
J192-049	0.09052	0.00154	3.1662	0.06038	0.25379	0.00383	-	0.68	1437	33	1449	15	1458	20	101	1437	33	Wu et al. (2010)
J192-050	0.07515	0.00111	1.88668	0.03317	0.18208	0.00275	-	2.26	1073	30	1076	12	1078	15	100	1073	30	Wu et al. (2010)
J192-051	0.07198	0.00097	1.63433	0.02677	0.1647	0.00239	-	1.51	985	28	984	10	983	13	100	983	13	Wu et al. (2010)
J192-052	0.10626	0.00182	4.60363	0.08829	0.31423	0.00489	-	0.87	1736	32	1750	16	1761	24	101	1736	32	Wu et al. (2010)
J192-053	0.06277	0.00127	0.78156	0.01692	0.09033	0.00137	-	0.55	700	44	586	10	557	8	80	557	8	Wu et al. (2010)
J192-054	0.10315	0.00229	4.22759	0.09731	0.2974	0.00481	-	1.64	1682	42	1679	19	1678	24	100	1682	42	Wu et al. (2010)
J192-055	0.07384	0.00113	1.75149	0.03158	0.17205	0.00262	-	1.02	1037	32	1028	12	1023	14	99	1037	32	Wu et al. (2010)
J192-056	0.05901	0.00093	0.73495	0.01331	0.09034	0.00133	-	1.52	567	35	559	8	558	8	98	558	8	Wu et al. (2010)
J192-057	0.0624	0.00086	0.73546	0.01197	0.08551	0.00121	-	0.55	688	30	560	7	529	7	77	529	7	Wu et al. (2010)
J192-058	0.07342	0.00121	1.8318	0.03478	0.18099	0.00281	-	0.99	1026	34	1057	12	1072	15	104	1026	34	Wu et al. (2010)
J192-059	0.12717	0.00282	6.45969	0.148	0.36868	0.00642	-	0.59	2059	40	2040	20	2023	30	98	2059	40	Wu et al. (2010)
J192-060	0.09971	0.00201	3.84681	0.08351	0.27985	0.00434	-	1.39	1619	38	1603	17	1591	22	98	1619	38	Wu et al. (2010)
J192-061	0.07283	0.00142	1.8104	0.03895	0.18032	0.00292	-	0.48	1009	40	1049	14	1069	16	106	1009	40	Wu et al. (2010)
J192-062	0.07169	0.00168	1.62187	0.04022	0.16404	0.0027	-	1.57	977	49	979	16	979	15	100	979	15	Wu et al. (2010)
J192-063	0.06154	0.00168	0.91496	0.02559	0.10784	0.0019	-	0.61	658	60	660	14	660	11	100	660	11	Wu et al. (2010)
J192-064	0.07321	0.00204	1.73863	0.04984	0.17217	0.00292	-	0.85	1020	58	1023	18	1024	16	100	1020	58	Wu et al. (2010)
J192-065	0.0663	0.00147	1.22752	0.02842	0.13438	0.0023	-	0.49	816	47	813	13	813	13	100	813	13	Wu et al. (2010)
J192-066	0.05815	0.00233	0.71309	0.02828	0.08893	0.00173	-	0.75	535	90	547	17	549	10	103	549	10	Wu et al. (2010)
J192-067	0.08904	0.00174	3.19303	0.06909	0.26009	0.00421	-	1.05	1405	38	1455	17	1490	22	106	1405	38	Wu et al. (2010)
J192-068	0.09889	0.00257	3.8965	0.10525	0.28581	0.00509	-	0.98	1603	50	1613	22	1621	26	101	1603	50	Wu et al. (2010)
J192-069	0.07243	0.00282	1.66502	0.0644	0.16673	0.00335	-	0.45	998	81	995	25	994	19	100	994	19	Wu et al. (2010)
J192-070	0.07325	0.00245	1.66907	0.05596	0.16527	0.00305	-	0.99	1021	69	997	21	986	17	97	986	17	Wu et al. (2010)
J192-071	0.07967	0.00146	2.18678	0.04462	0.19912	0.00311	-	0.17	1189	37	1177	14	1171	17	98	1189	37	Wu et al. (2010)
J192-072	0.06347	0.00115	1.05679	0.0215	0.12079	0.00189	-	0.05	724	39	732	11	735	11	102	735	11	Wu et al. (2010)
J192-073	0.07157	0.00316	1.61291	0.06951	0.16358	0.00352	-	0.49	974	92	975	27	977	20	100	977	20	Wu et al. (2010)
J192-074	0.07953	0.00186	2.0675	0.05097	0.18857	0.0032	-	1.01	1185	47	1138	17	1114	17	94	1185	47	Wu et al. (2010)
J192-075	0.08884	0.0041	3.01637	0.13482	0.24625	0.00554	-	0.53	1401	91	1412	34	1419	29	101	1401	91	Wu et al. (2010)
J192-077	0.07392	0.00131	1.77801	0.03516	0.17447	0.0027	-	0.02	1039	37	1037	13	1037	15	100	1039	37	Wu et al. (2010)
J192-078	0.07155	0.00273	1.6024	0.05998	0.16244	0.00324	-	1.03	973	80	971	23	970	18	100	970	18	Wu et al. (2010)
J192-079	0.08799	0.00233	2.80298	0.07575	0.23105	0.00416	-	0.69	1382	52	1356	20	1340	22	97	1382	52	Wu et al. (2010)
J192-080	0.07286	0.00161	1.68246	0.03925	0.16751	0.0027	-	0.46	1010	46	1002	15	998	15	99	998	15	Wu et al. (2010)
J192-081	0.07702	0.00231	2.0181	0.06102	0.19005	0.00345	-	0.83	1122	61	1122	21	1122	19	100	1122	61	Wu et al. (2010)
J192-082	0.08988	0.00261	2.99591	0.08753	0.24179	0.00421	-	0.09	1423	57	1407	22	1396	22	98	1423	57	Wu et al. (2010)
J192-083	0.06164	0.00194	0.92681	0.02947	0.10907	0.00198	-	0.52	662	69	666	16	667	12	101	667	12	Wu et al. (2010)
J192-084	0.10488	0.00251	4.55929	0.1151	0.31544	0.00541	-	0.78	1712	45	1742	21	1767	27	103	1712	45	Wu et al. (2010)
J192-085	0.08572	0.00322	2.71204	0.09998	0.22953	0.00458	-	0.66	1332	74	1332	27	1332	24	100	1332	74	Wu et al. (2010)
J192-086	0.07143	0.00118	1.5909	0.03016	0.16156	0.00249	-	0.37	970	34	967	12	965	14	99	965	14	Wu et al. (2010)
J192-087	0.11064	0.00523	4.88786	0.22786	0.32125	0.00749	-	0.42	1810	88	1800	39	1796	37	99	1810	88	Wu et al. (2010)
J192-088	0.07693	0.00237	2.01472	0.06201	0.19	0.00333	-	0.26	1119	63	1120	21	1121	18	100	1119	63	Wu et al. (2010)
J192-089	0.0698	0.00219	1.48342	0.04704	0.15418	0.00287	-	0.53	922	66	924	19	924	16	100	924	16	Wu et al. (2010)
J192-090	0.05796	0.00133	0.57118	0.01406	0.0715	0.0012	-	0.95	528	51	459	9	445	7	84	445	7	Wu et al. (2010)
J192-091	0.07265	0.00141	1.68269	0.03615	0.16803	0.00266	-	0.69	1004	40	1002	14	1001	15	100	1004	40	Wu et al. (2010)
J192-092	0.13049	0.00285	7.2717	0.16812	0.40425	0.00633	-	0.37	2105	39	2145	21	2189	29	104	2105	39	Wu et al. (2010)
J192-093	0.11087	0.0067	5.21193	0.30091	0.34049	0.01018	-	1.17	1814	113	1855	49	1889	49	104	1814	113	Wu et al. (2010)
J192-094	0.0628	0.00408	0.99277	0.06138	0.11498	0.00334	-	0.02	701	142	700	31	702	19	100	702	19	Wu et al. (2010)
J192-095	0.07152	0.00349	1.59458	0.07597	0.16189	0.00381	-	2.28	972	102	968	30	967	21	99	967	21	Wu et al. (2010)
J192-096	0.07293	0.00165	1.75733	0.04248	0.1748	0.0028	-	0.05	1012	47	1030	16	1039	15	103	1012	47	Wu et al. (2010)
J192-097	0.07834	0.00162	2.13179	0.04868	0.19738	0.00326	-	0.46	1156	42	1159	16	1161	18	100	1156	42	Wu et al. (2010)
J192-098	0.08812	0.00301	2.65127	0.09063	0.21832	0.0043	-	1.63	1385	67	1315	25	1273	23	92	1385	67	Wu et al. (2010)
J192-099	0.0714	0.00334	1.68318	0.07784	0.17092	0.00389	-	0.17	969	98	1002	29	1017	21	105	969	98	Wu et al. (2010)
J192-100	0.0806	0.00272	2.30771	0.07837	0.20785	0.00389	-	0.66	1212	68	1215	24	1217	21	100	1212	68	Wu et al. (2010)
J192-101	0.05903	0.0069	0.7409	0.08323	0.09109	0.00356	-	2.33	568	264	563	49	562	21	99	562	21	Wu et al. (2010)
J192-102	0.07293	0.00182	1.72152	0.04534	0.17122	0.00294	-	0.52	1012	52	1017	17	1019	16	101	1012	52	Wu et al. (2010)
J192-103	0.07551	0.00433	1.90413	0.10549	0.18284	0.00463	-	0.76	1082	118	1083	37	1082	25	100	1082	118	Wu et al. (2010)
J192-104	0.07189	0.00269	1.64501	0.0613	0.16592	0.0032	-	0.7	983	78	988	24	990	18	101	990	18	Wu et al. (2010)
J192-105	0.06092	0.00251	0.85527	0.03494	0.10184	0.00201	-	0.65	636	91	628	19	625	12	98	625	12	Wu et al. (2010)
J192-106	0.06621	0.00508	1.2309	0.09085	0.13491	0.00401	-	1.29	813	166	815	41	816	23	100	816	23	Wu et al. (2010)
J192-107	0.07694	0.00407	2.01252	0.10413	0.18968	0.00447	-	0.44	1120	108	1120	35	1120	24	100	1120	108	Wu et al. (2010)
J192-108	0.16463	0.00381	10.9925	0.26958	0.48426	0.00832	-	0.96	2504	40	2522	23	2546	36	102	2504	40	Wu et al. (2010)
J192-109	0.07581	0.00341	1.9208	0.0844	0.18394	0.00409	-	0.21	1090	92	1088	29	1088	22	100	1090	92	Wu et al. (2010)
J192-110	0.07261	0.00321	1.68819	0.07334	0.16858	0.0036	-	0.61	1003	92	1004	28	1004	20	100	1003	92	Wu et al. (2010)
J192-111	0.22363	0.0049	18.3913	0.43093	0.59647	0.00994	-	0.42	3007	36	3010	23	3016	40	100	3007	36	Wu et al. (2010)
J192-112	0.06985	0.00348	1.50476	0.07303	0.15628	0.00355	-	0.62	924	105	932	30	936	20	101	936	20	Wu et al. (2010)
J192-113	0.07298	0.00272	1.70688	0.06367	0.1697	0.00338	-	0.05	1013	77	1011	24	1010	19	100	1013	77	Wu et al. (2010)
J192-114	0.09815	0.00395	3.86232	0.15282	0.28573	0.00572	-	1.39	1589	77	1606	32	1620	29	102	1589	77	Wu et al. (2010)
J192-115	0.0796	0.00362	2.20388	0.09803	0.2009	0.0042	-	0.84	1187	92	1182	31	1180	23	99	1187	92	Wu et al. (2010)
J192-116	0.05895	0.00247	0.74501	0.03095	0.09169	0.0019	-	1.6	565	94	565	18	566	11	100	566	11	Wu et al. (2010)
J192-117	0.07319	0.00303	1.67919	0.06857	0.16639	0.00342	-	0.85	1019	86	1001	26	992	19	97	992	19	Wu et al. (2010)
J192-118	0.07265	0.00188	1.65317	0.04471	0.16505	0.00281	-	0.31	1004	54	991	17	985	16	98	985	16	Wu et al. (2010)
J192-119	0.07269	0.00229	1.69532	0.05394	0.16915	0.00304	-	1.07	1005	65	1007	20	1007	17	100	1005	65	Wu et al. (2010)
J192-120	0.08027	0.00496	2.27073	0.13491	0.20523	0.00521	-	1.34	1204	125	1203	42	1203	28	100	1204	125	Wu et al. (2010)
J192-121	0.07278	0.0029	1.69149	0.06694	0.16855	0.00355	-	0.34	1008	83	1005	25	1004	20	100	1008	83	Wu et al. (2010)
J192-122	0.11023	0.00231	4.93828	0.11421	0.32492	0.00542	-	0.31	1803	39	1809	20	1814	26	101	1803	39	Wu et al. (2010)
J192-123	0.06008	0.00427	0.76136	0.05131	0.09196	0.00278	-	0.58	606	159	575	30	567	16	94	567	16	Wu et al. (2010)
J192-124	0.07175	0.00277	1.19594	0.04572	0.12088	0.00251	-	0.11	979	81	799	21	736	14	75	736	14	Wu et al. (2010)
J192-125	0.07891	0.00397	2.1318	0.10422	0.19596	0.00439	-	2.2	1170	102	1159	34	1154	24	99	1170	102	Wu et al. (2010)
J192-126	0.07327	0.00235	1.76618	0.05783	0.17486	0.00323	-	0.34	1021	66	1033	21	1039	18	102	1021	66	Wu et al. (2010)
J192-127	0.1546	0.00707	9.59502	0.42373	0.45024	0.00967	-	0.46	2397	80	2397	41	2396	43	100	2397	80	Wu et al. (2010)
J192-128	0.08452	0.00224	2.6121	0.07221	0.22414	0.00389	-	1.25	1305	53	1304	20	1304	20	100	1305	53	Wu et al. (2010)
J192-129	0.0802	0.00306	2.25067	0.08571	0.20352	0.00393	-	0.58	1202	77	1197	27	1194	21	99	1202	77	Wu et al. (2010)
J192-130	0.10203	0.00306	4.23944	0.13006	0.30137	0.00541	-	0.16	1661	57	1682	25	1698	27	102	1661	57	Wu et al. (2010)
J192-131	0.16506	0.00684	11.2382	0.46049	0.4938	0.01019	-	1	2508	71	2543	38	2587	44	103	2508	71	Wu et al. (2010)
J192-132	0.09209	0.00189	3.25005	0.07409	0.25596	0.00424	-	0.25	1469	40	1469	18	1469	22	100	1469	40	Wu et al. (2010)
J192-133	0.26758	0.01099	22.1876	0.89513	0.60141	0.01359	-	0.38	3292	66	3192	39	3036	55	92	3292	66	Wu et al. (2010)
J192-134	0.05998	0.00375	0.79344	0.04834	0.09594	0.00239	-	3.99	603	139	593	27	591	14	98	591	14	Wu et al. (2010)
J192-135	0.08924	0.00326	2.88909	0.10457	0.23485	0.00454	-	0.7	1409	72	1379	27	1360	24	97	1409	72	Wu et al. (2010)
J192-136	0.07345	0.00316	1.7383	0.07357	0.17155	0.00368	-	0.38	1026	89	1023	27	1021	20	100	1026	89	Wu et al. (2010)
J192-137	0.07414	0.00221	1.7946	0.05459	0.17552	0.00314	-	0.78	1045	62	1043	20	1042	17	100	1045	62	Wu et al. (2010)
J192-138	0.08097	0.00187	2.39434	0.05902	0.21448	0.00354	-	0.25	1221	46	1241	18	1253	19	103	1221	46	Wu et al. (2010)
J192-139	0.10305	0.00469	3.6717	0.16311	0.25832	0.00551	-	0.86	1680	86	1565	35	1481	28	88	1680	86	Wu et al. (2010)
J192-140	0.07546	0.00425	1.92008	0.10374	0.18458	0.00451	-	0.91	1081	116	1088	36	1092	25	101	1081	116	Wu et al. (2010)
J186 N26°49'36.6" E114°37'16.4"				Middle Cambrian
J186-001	0.07536	0.00155	1.61338	0.03506	0.15527	0.00232	-	2.49	1078	42	975	14	930	13	86	930	13	Wu et al. (2010)
J186-002	0.18407	0.0037	10.7167	0.23476	0.42236	0.00649	-	1.12	2690	34	2499	20	2271	29	84	2690	34	Wu et al. (2010)
J186-003	0.06363	0.0019	0.86961	0.02641	0.09912	0.00168	-	0.6	729	65	635	14	609	10	84	609	10	Wu et al. (2010)
J186-004	0.06355	0.00158	0.82809	0.02028	0.09455	0.00128	-	0.55	727	54	613	11	582	8	80	582	8	Wu et al. (2010)
J186-005	0.07424	0.00123	1.61678	0.02836	0.15798	0.00208	-	0.64	1048	34	977	11	946	12	90	946	12	Wu et al. (2010)
J186-006	0.15709	0.00472	9.82614	0.30375	0.45324	0.00835	-	0.61	2425	52	2419	28	2410	37	99	2425	52	Wu et al. (2010)
J186-007	0.07753	0.00205	1.87519	0.05143	0.17544	0.00296	-	1.46	1135	54	1072	18	1042	16	92	1135	54	Wu et al. (2010)
J186-008	0.0988	0.00148	0.97494	0.01659	0.07157	0.00099	-	1.38	1602	29	691	9	446	6	28	446	6	Wu et al. (2010)
J186-009	0.0645	0.00176	1.15887	0.03103	0.13034	0.00183	-	0.56	758	59	781	15	790	10	104	790	10	Wu et al. (2010)
J186-010	0.18331	0.00369	10.6349	0.21642	0.42085	0.00534	-	0.37	2683	34	2492	19	2264	24	84	2683	34	Wu et al. (2010)
J186-011	0.08914	0.00118	1.62293	0.02425	0.13205	0.0017	-	2.94	1407	26	979	9	800	10	57	800	10	Wu et al. (2010)
J186-012	0.07839	0.00106	1.91087	0.02914	0.17679	0.0023	-	0.8	1157	27	1085	10	1049	13	91	1157	27	Wu et al. (2010)
J186-013	0.06884	0.00152	1.09179	0.02498	0.11501	0.00173	-	0.88	894	47	749	12	702	10	79	702	10	Wu et al. (2010)
J186-014	0.08054	0.00125	2.30917	0.03776	0.20794	0.00263	-	2.39	1210	31	1215	12	1218	14	101	1210	31	Wu et al. (2010)
J186-015	0.29682	0.00393	26.0529	0.38699	0.63651	0.00809	-	1.05	3454	21	3349	15	3175	32	92	3454	21	Wu et al. (2010)
J186-016	0.09885	0.00147	3.8254	0.06525	0.28069	0.00395	-	0.52	1603	28	1598	14	1595	20	100	1603	28	Wu et al. (2010)
J186-017	0.0727	0.00207	1.6946	0.04851	0.16907	0.00273	-	2.66	1006	59	1006	18	1007	15	100	1006	59	Wu et al. (2010)
J186-018	0.10987	0.00161	4.88212	0.08093	0.3223	0.0044	-	0.28	1797	27	1799	14	1801	21	100	1797	27	Wu et al. (2010)
J186-019	0.08404	0.00153	2.60147	0.05247	0.22448	0.00337	-	0.45	1293	36	1301	15	1306	18	101	1293	36	Wu et al. (2010)
J186-020	0.18388	0.00292	13.0087	0.2225	0.51298	0.00681	-	0.95	2688	27	2680	16	2669	29	99	2688	27	Wu et al. (2010)
J186-021	0.16279	0.00225	10.5378	0.17308	0.46953	0.0067	-	1.79	2485	24	2483	15	2481	29	100	2485	24	Wu et al. (2010)
J186-022	0.07252	0.00104	1.61235	0.02649	0.16127	0.00222	-	0.08	1001	30	975	10	964	12	96	964	12	Wu et al. (2010)
J186-023	0.19003	0.00254	13.3562	0.20424	0.50973	0.00681	-	0.64	2742	22	2705	14	2655	29	97	2742	22	Wu et al. (2010)
J186-025	0.08889	0.00173	2.99305	0.0584	0.24422	0.00318	-	0.72	1402	38	1406	15	1409	16	100	1402	38	Wu et al. (2010)
J186-026	0.08966	0.00242	1.72172	0.04595	0.13936	0.00217	-	0.74	1418	53	1017	17	841	12	59	841	12	Wu et al. (2010)
J186-027	0.09549	0.00141	3.55269	0.05676	0.26982	0.00347	-	0.47	1538	28	1539	13	1540	18	100	1538	28	Wu et al. (2010)
J186-028	0.07299	0.00151	1.75835	0.03729	0.17474	0.00244	-	1.27	1014	43	1030	14	1038	13	102	1014	43	Wu et al. (2010)
J186-029	0.06801	0.00174	1.35427	0.03537	0.14444	0.00231	-	0.61	869	54	869	15	870	13	100	870	13	Wu et al. (2010)
J186-030	0.1054	0.00161	4.45862	0.07521	0.30682	0.00417	-	1.36	1721	29	1723	14	1725	21	100	1721	29	Wu et al. (2010)
J186-031	0.07072	0.00114	1.54021	0.02629	0.15798	0.00206	-	0.14	949	34	947	11	946	11	100	946	11	Wu et al. (2010)
J186-032	0.10633	0.00154	4.23369	0.0697	0.28882	0.00401	-	1.78	1737	27	1681	14	1636	20	94	1737	27	Wu et al. (2010)
J186-033	0.09892	0.0015	3.55034	0.05984	0.26035	0.00356	-	1.13	1604	29	1539	13	1492	18	93	1604	29	Wu et al. (2010)
J186-034	0.07348	0.00255	1.407	0.04702	0.13901	0.00231	-	1.02	1027	72	892	20	839	13	82	839	13	Wu et al. (2010)
J186-035	0.0682	0.00111	1.4589	0.02543	0.15517	0.00204	-	0.11	875	34	914	11	930	11	106	930	11	Wu et al. (2010)
J186-036	0.16664	0.00316	10.9902	0.23201	0.47838	0.00762	-	1.5	2524	33	2522	20	2520	33	100	2524	33	Wu et al. (2010)
J186-037	0.09366	0.00262	3.33193	0.09113	0.25808	0.00405	-	1.38	1501	54	1489	21	1480	21	99	1501	54	Wu et al. (2010)
J186-038	0.08079	0.00257	2.31657	0.07143	0.20804	0.00335	-	0.79	1216	64	1217	22	1218	18	100	1216	64	Wu et al. (2010)
J186-039	0.0892	0.00172	1.29671	0.02569	0.10545	0.00142	-	1.44	1408	38	844	11	646	8	46	646	8	Wu et al. (2010)
J186-040	0.18572	0.00326	13.4009	0.24888	0.52344	0.00708	-	0.59	2705	30	2708	18	2714	30	100	2705	30	Wu et al. (2010)
J186-041	0.1045	0.00157	4.45771	0.07149	0.30939	0.00395	-	1.69	1706	28	1723	13	1738	19	102	1706	28	Wu et al. (2010)
J186-042	0.09621	0.00132	3.38307	0.05299	0.2551	0.00343	-	0.87	1552	26	1500	12	1465	18	94	1552	26	Wu et al. (2010)
J186-043	0.17618	0.00257	4.55205	0.07277	0.18746	0.00245	-	0.92	2617	25	1741	13	1108	13	42	2617	25	Wu et al. (2010)
J186-044	0.08077	0.00389	2.11987	0.09814	0.19042	0.00407	-	0.68	1216	97	1155	32	1124	22	92	1216	97	Wu et al. (2010)
J186-045	0.09457	0.00191	3.33044	0.06727	0.25544	0.00335	-	0.69	1520	39	1488	16	1466	17	96	1520	39	Wu et al. (2010)
J186-046	0.07073	0.00134	1.63242	0.03416	0.1674	0.00259	-	0.21	950	40	983	13	998	14	105	998	14	Wu et al. (2010)
J186-047	0.07091	0.00203	1.54481	0.0438	0.15813	0.00249	-	0.68	955	60	948	17	946	14	99	946	14	Wu et al. (2010)
J186-048	0.08898	0.00261	1.6996	0.04944	0.13856	0.0022	-	0.64	1404	58	1008	19	837	12	60	837	12	Wu et al. (2010)
J186-049	0.07148	0.0016	1.61241	0.0384	0.16361	0.00265	-	0.33	971	47	975	15	977	15	101	977	15	Wu et al. (2010)
J186-050	0.08123	0.00203	2.49241	0.06205	0.22259	0.00328	-	0.77	1227	50	1270	18	1296	17	106	1227	50	Wu et al. (2010)
J186-051	0.0803	0.002	2.05935	0.05188	0.18606	0.00289	-	2.02	1204	50	1135	17	1100	16	91	1204	50	Wu et al. (2010)
J186-052	0.06885	0.00105	1.15957	0.01725	0.12214	0.0015	-	1.63	894	32	782	8	743	9	83	743	9	Wu et al. (2010)
J186-053	0.16449	0.00158	10.2087	0.10049	0.45014	0.00574	-	1.33	2502	17	2454	9	2396	26	96	2502	17	Wu et al. (2010)
J186-054	0.1689	0.00362	11.3079	0.23636	0.48493	0.00782	-	0.21	2547	37	2549	19	2549	34	100	2547	37	Wu et al. (2010)
J186-055	0.06965	0.00142	1.46817	0.0294	0.15296	0.00229	-	0.79	918	43	917	12	918	13	100	918	13	Wu et al. (2010)
J186-056	0.16427	0.00165	9.50465	0.09882	0.41962	0.00528	-	0.82	2500	17	2388	10	2259	24	90	2500	17	Wu et al. (2010)
J186-057	0.07236	0.00162	1.53374	0.03352	0.15379	0.00243	-	0.65	996	47	944	13	922	14	93	922	14	Wu et al. (2010)
J186-058	0.29965	0.00357	20.4344	0.24447	0.49451	0.00602	-	1.04	3468	19	3112	12	2590	26	75	3468	19	Wu et al. (2010)
J186-059	0.07055	0.00163	1.53847	0.03458	0.15824	0.00212	-	0.85	944	48	946	14	947	12	100	947	12	Wu et al. (2010)
J186-060	0.07278	0.00129	1.69299	0.02964	0.16873	0.00242	-	1.55	1008	37	1006	11	1005	13	100	1008	37	Wu et al. (2010)
J186-061	0.07314	0.00251	1.78886	0.05867	0.17732	0.00332	-	0.36	1018	71	1041	21	1052	18	103	1018	71	Wu et al. (2010)
J186-062	0.16438	0.00237	10.6805	0.15756	0.47133	0.00678	-	0.46	2501	25	2496	14	2489	30	100	2501	25	Wu et al. (2010)
J186-063	0.18563	0.00303	13.4432	0.2302	0.52526	0.0068	-	0.56	2704	28	2711	16	2721	29	101	2704	28	Wu et al. (2010)
J186-064	0.1077	0.00141	4.73791	0.07235	0.31907	0.00427	-	1.05	1761	24	1774	13	1785	21	101	1761	24	Wu et al. (2010)
J186-065	0.08018	0.00168	2.28279	0.04821	0.20651	0.00283	-	2.3	1201	42	1207	15	1210	15	101	1201	42	Wu et al. (2010)
J186-066	0.17431	0.00234	10.2661	0.15502	0.42717	0.00551	-	0.65	2599	23	2459	14	2293	25	88	2599	23	Wu et al. (2010)
J186-067	0.11008	0.00229	3.76025	0.08222	0.24781	0.00368	-	0.64	1801	39	1584	18	1427	19	79	1801	39	Wu et al. (2010)
J186-068	0.06603	0.0016	1.24884	0.03175	0.13721	0.00223	-	0.63	807	52	823	14	829	13	103	829	13	Wu et al. (2010)
J186-069	0.06402	0.00116	1.10928	0.0207	0.12568	0.00163	-	0.6	742	39	758	10	763	9	103	763	9	Wu et al. (2010)
J186-070	0.07355	0.00117	1.79732	0.03259	0.17724	0.00255	-	0.7	1029	33	1044	12	1052	14	102	1029	33	Wu et al. (2010)
J186-071	0.1414	0.00306	5.35912	0.11565	0.27488	0.00368	-	0.18	2244	38	1878	18	1566	19	70	2244	38	Wu et al. (2010)
J186-072	0.08447	0.00223	2.60636	0.07276	0.2238	0.00387	-	1.79	1303	52	1302	20	1302	20	100	1303	52	Wu et al. (2010)
J186-073	0.07053	0.00258	1.45802	0.0525	0.15001	0.00274	-	1.35	944	77	913	22	901	15	95	901	15	Wu et al. (2010)
J186-074	0.09877	0.0023	3.4493	0.08256	0.25346	0.00396	-	0.22	1601	44	1516	19	1456	20	91	1601	44	Wu et al. (2010)
J186-075	0.12371	0.00518	5.97347	0.24301	0.3502	0.00817	-	1.38	2010	76	1972	35	1936	39	96	2010	76	Wu et al. (2010)
J186-076	0.08933	0.00247	2.33269	0.06346	0.18941	0.00302	-	0.51	1411	54	1222	19	1118	16	79	1411	54	Wu et al. (2010)
J186-077	0.07342	0.00201	1.7871	0.0505	0.17655	0.00306	-	1.02	1026	57	1041	18	1048	17	102	1026	57	Wu et al. (2010)
J186-078	0.07298	0.00105	1.70678	0.02782	0.16965	0.00229	-	0.37	1013	30	1011	10	1010	13	100	1013	30	Wu et al. (2010)
J186-079	0.06083	0.00227	0.8668	0.03194	0.10335	0.00193	-	1.13	633	82	634	17	634	11	100	634	11	Wu et al. (2010)
J186-080	0.16384	0.00477	10.4528	0.306	0.46274	0.00913	-	0.85	2496	50	2476	27	2452	40	98	2496	50	Wu et al. (2010)
J186-081	0.08051	0.00141	1.65621	0.03059	0.14922	0.002	-	1.04	1210	35	992	12	897	11	74	1210	35	Wu et al. (2010)
J186-082	0.09008	0.00293	3.12726	0.10206	0.25178	0.00478	-	0.78	1427	64	1439	25	1448	25	101	1427	64	Wu et al. (2010)
J186-083	0.16745	0.00405	11.1948	0.28057	0.48499	0.0074	-	1.15	2532	42	2539	23	2549	32	101	2532	42	Wu et al. (2010)
J186-084	0.11395	0.00376	5.36944	0.17191	0.34174	0.00553	-	0.86	1863	61	1880	27	1895	27	102	1863	61	Wu et al. (2010)
J186-085	0.16255	0.00231	10.5417	0.17565	0.47044	0.00675	-	0.47	2482	25	2484	15	2485	30	100	2482	25	Wu et al. (2010)
J186-086	0.07085	0.00168	1.55413	0.03795	0.1591	0.00248	-	1.51	953	50	952	15	952	14	100	952	14	Wu et al. (2010)
J186-087	0.07585	0.00186	1.85992	0.04652	0.17779	0.00277	-	0.33	1091	50	1067	17	1055	15	97	1091	50	Wu et al. (2010)
J186-088	0.07833	0.0017	2.10805	0.04782	0.19516	0.00299	-	0.9	1155	44	1151	16	1149	16	99	1155	44	Wu et al. (2010)
J186-089	0.07905	0.00282	2.18407	0.07715	0.2003	0.00366	-	0.92	1173	72	1176	25	1177	20	100	1173	72	Wu et al. (2010)
J186-090	0.09411	0.00209	3.11513	0.07201	0.23998	0.00362	-	1.2	1510	43	1436	18	1387	19	92	1510	43	Wu et al. (2010)
J186-091	0.09078	0.00225	3.14799	0.08116	0.25166	0.00416	-	0.75	1442	48	1445	20	1447	21	100	1442	48	Wu et al. (2010)
J186-092	0.07304	0.00265	1.70342	0.06148	0.16919	0.00321	-	0.67	1015	75	1010	23	1008	18	99	1015	75	Wu et al. (2010)
J186-093	0.06479	0.00203	1.13129	0.03558	0.12664	0.00219	-	1.26	768	68	768	17	769	13	100	769	13	Wu et al. (2010)
J186-094	0.07383	0.00272	1.7957	0.06588	0.17634	0.0033	-	0.53	1037	76	1044	24	1047	18	101	1037	76	Wu et al. (2010)
J186-095	0.09641	0.00223	3.44136	0.0835	0.25894	0.00428	-	1	1556	44	1514	19	1484	22	95	1556	44	Wu et al. (2010)
J186-096	0.06298	0.00186	1.02623	0.03093	0.1182	0.00202	-	1.23	708	64	717	15	720	12	102	720	12	Wu et al. (2010)
J186-097	0.06101	0.00334	0.86786	0.04631	0.10316	0.0023	-	2.52	640	121	634	25	633	13	99	633	13	Wu et al. (2010)
J186-098	0.05937	0.00125	0.7806	0.01788	0.09538	0.00151	-	0.21	581	47	586	10	587	9	101	587	9	Wu et al. (2010)
J186-099	0.14059	0.00654	7.05899	0.32234	0.36426	0.00798	-	0.8	2234	82	2119	41	2002	38	90	2234	82	Wu et al. (2010)
J186-100	0.09014	0.00148	3.29456	0.06261	0.26508	0.00411	-	0.73	1428	32	1480	15	1516	21	106	1428	32	Wu et al. (2010)
J186-101	0.07728	0.00167	2.03084	0.04741	0.19059	0.00318	-	1.8	1128	44	1126	16	1125	17	100	1128	44	Wu et al. (2010)
J186-102	0.08038	0.0024	2.23222	0.06704	0.2014	0.00351	-	1.03	1206	60	1191	21	1183	19	98	1206	60	Wu et al. (2010)
J186-103	0.07771	0.00174	2.06969	0.05025	0.19318	0.00326	-	0.89	1139	46	1139	17	1139	18	100	1139	46	Wu et al. (2010)
J186-104	0.06376	0.00186	1.06524	0.03203	0.12117	0.00216	-	0.52	734	63	736	16	737	12	100	737	12	Wu et al. (2010)
J186-105	0.07004	0.00242	1.49781	0.05158	0.15505	0.00294	-	3.05	930	73	929	21	929	16	100	929	16	Wu et al. (2010)
J186-106	0.08048	0.00198	2.27195	0.05795	0.20477	0.00334	-	0.47	1209	50	1204	18	1201	18	99	1209	50	Wu et al. (2010)
J186-107	0.06794	0.00217	1.34833	0.04409	0.14393	0.00271	-	0.83	867	68	867	19	867	15	100	867	15	Wu et al. (2010)
J186-108	0.07229	0.00653	1.66512	0.14438	0.16734	0.00614	-	2.18	994	190	995	55	997	34	100	997	34	Wu et al. (2010)
J186-109	0.16141	0.00324	10.4011	0.22549	0.46739	0.00752	-	1.48	2470	35	2471	20	2472	33	100	2470	35	Wu et al. (2010)
J186-110	0.21412	0.00665	17.0194	0.53011	0.57662	0.01016	-	0.99	2937	51	2936	30	2935	42	100	2937	51	Wu et al. (2010)
J186-111	0.05843	0.00346	0.71595	0.04117	0.08887	0.00209	-	2.87	546	133	548	24	549	12	101	549	12	Wu et al. (2010)
J186-112	0.0581	0.00141	0.69067	0.01769	0.08622	0.00143	-	1.27	534	54	533	11	533	8	100	533	8	Wu et al. (2010)
J186-113	0.17926	0.0058	12.5704	0.40805	0.50863	0.00908	-	0.59	2646	55	2648	31	2651	39	100	2646	55	Wu et al. (2010)
J186-114	0.0769	0.00236	2.00366	0.06197	0.18901	0.00328	-	0.31	1119	63	1117	21	1116	18	100	1119	63	Wu et al. (2010)
J186-115	0.06475	0.00185	1.12999	0.03322	0.12658	0.00227	-	1.13	766	62	768	16	768	13	100	768	13	Wu et al. (2010)
J186-116	0.08171	0.00216	2.38306	0.06448	0.21155	0.00363	-	2.31	1239	53	1238	19	1237	19	100	1239	53	Wu et al. (2010)
J186-117	0.07288	0.00206	1.70885	0.04999	0.17011	0.00308	-	0.35	1011	59	1012	19	1013	17	100	1011	59	Wu et al. (2010)
J186-118	0.07735	0.00177	2.04967	0.05044	0.19222	0.00331	-	0.96	1130	47	1132	17	1133	18	100	1130	47	Wu et al. (2010)
J186-119	0.07701	0.00235	2.0443	0.06292	0.19254	0.00344	-	0.55	1121	62	1130	21	1135	19	101	1121	62	Wu et al. (2010)
J186-120	0.07623	0.00364	1.96601	0.09176	0.18712	0.00423	-	2.01	1101	98	1104	31	1106	23	100	1101	98	Wu et al. (2010)
J186-121	0.07562	0.00287	1.91333	0.07226	0.18349	0.00371	-	2.24	1085	78	1086	25	1086	20	100	1085	78	Wu et al. (2010)
J186-122	0.10045	0.00314	4.22386	0.13348	0.30493	0.00557	-	0.21	1632	59	1679	26	1716	28	105	1632	59	Wu et al. (2010)
J186-123	0.07352	0.00181	1.76122	0.04506	0.17376	0.00287	-	0.49	1028	51	1031	17	1033	16	100	1028	51	Wu et al. (2010)
J186-124	0.07261	0.00254	1.83707	0.06507	0.18358	0.00359	-	0.37	1003	73	1059	23	1087	20	108	1003	73	Wu et al. (2010)
J186-125	0.09989	0.00355	4.16437	0.14851	0.30256	0.00613	-	0.89	1622	68	1667	29	1704	30	105	1622	68	Wu et al. (2010)
J186-126	0.07322	0.00245	1.72902	0.0585	0.17133	0.00319	-	0.53	1020	69	1019	22	1019	18	100	1020	69	Wu et al. (2010)
J186-127	0.17088	0.00696	10.7212	0.4369	0.45531	0.0097	-	0.71	2566	70	2499	38	2419	43	94	2566	70	Wu et al. (2010)
J186-128	0.07761	0.00405	2.0554	0.10448	0.19212	0.00433	-	0.11	1137	107	1134	35	1133	23	100	1137	107	Wu et al. (2010)
J186-129	0.07331	0.00439	1.33395	0.07837	0.13196	0.00355	-	0.47	1023	125	861	34	799	20	78	799	20	Wu et al. (2010)
J186-130	0.16443	0.00593	10.7401	0.37788	0.47408	0.01029	-	2.01	2502	62	2501	33	2501	45	100	2502	62	Wu et al. (2010)
J186-131	0.07212	0.00206	1.64103	0.04763	0.16502	0.00287	-	0.95	989	59	986	18	985	16	100	985	16	Wu et al. (2010)
J186-132	0.16003	0.00335	11.1317	0.24939	0.50449	0.00789	-	0.54	2456	36	2534	21	2633	34	107	2456	36	Wu et al. (2010)
J186-133	0.26952	0.0079	24.9168	0.73787	0.67054	0.01167	-	0.36	3303	47	3305	29	3308	45	100	3303	47	Wu et al. (2010)
J186-134	0.07257	0.00374	1.66295	0.08312	0.16633	0.00385	-	0.71	1002	107	995	32	992	21	99	992	21	Wu et al. (2010)
J186-135	0.06613	0.00322	1.21931	0.05768	0.13374	0.0029	-	0.74	810	104	809	26	809	16	100	809	16	Wu et al. (2010)
J186-136	0.06715	0.00264	1.29534	0.05056	0.13993	0.00282	-	0.6	842	84	844	22	844	16	100	844	16	Wu et al. (2010)
J186-137	0.16557	0.00442	10.8771	0.29825	0.4765	0.00879	-	2.43	2513	46	2513	25	2512	38	100	2513	46	Wu et al. (2010)
J186-138	0.07397	0.00347	1.78793	0.08195	0.17535	0.00395	-	1.12	1041	97	1041	30	1042	22	100	1041	97	Wu et al. (2010)
J186-139	0.07948	0.00683	2.21738	0.18243	0.20237	0.00695	-	2.12	1184	176	1187	58	1188	37	100	1184	176	Wu et al. (2010)
J188 N26°48'50.0" E114°26'16.4"				Middle Cambrian
J188-001	0.16133	0.00308	10.0969	0.20231	0.4539	0.00621	-	0.68	2470	33	2444	19	2413	28	98	2470	33	Wu et al. (2010)
J188-002	0.07083	0.00161	1.55418	0.03665	0.1592	0.00234	-	1.2	953	48	952	15	952	13	100	952	13	Wu et al. (2010)
J188-003	0.15886	0.00439	9.39914	0.26664	0.42891	0.00685	-	0.3	2444	48	2378	26	2301	31	94	2444	48	Wu et al. (2010)
J188-004	0.08845	0.00249	2.95752	0.08825	0.24241	0.00405	-	0.63	1392	55	1397	23	1399	21	101	1392	55	Wu et al. (2010)
J188-005	0.07232	0.00154	1.27974	0.02885	0.12837	0.00179	-	0.31	995	44	837	13	779	10	78	779	10	Wu et al. (2010)
J188-006	0.06955	0.00216	1.46547	0.0464	0.15298	0.00249	-	0.34	915	65	916	19	918	14	100	918	14	Wu et al. (2010)
J188-007	0.06905	0.00311	1.41631	0.06517	0.14866	0.00313	-	0.58	900	95	896	27	893	18	99	893	18	Wu et al. (2010)
J188-008	0.09656	0.00246	3.64285	0.10038	0.27364	0.00451	-	1	1559	49	1559	22	1559	23	100	1559	49	Wu et al. (2010)
J188-009	0.06481	0.00143	1.12016	0.0269	0.12535	0.00187	-	1.48	768	48	763	13	761	11	99	761	11	Wu et al. (2010)
J188-010	0.07396	0.0019	1.68559	0.04743	0.16533	0.00271	-	0.03	1040	53	1003	18	986	15	95	986	15	Wu et al. (2010)
J188-011	0.06467	0.00208	1.10069	0.03511	0.12344	0.00208	-	0.77	764	69	754	17	750	12	98	750	12	Wu et al. (2010)
J188-012	0.0725	0.0013	1.32493	0.02579	0.13253	0.00192	-	2.04	1000	37	857	11	802	11	80	802	11	Wu et al. (2010)
J188-013	0.11124	0.00234	4.53988	0.09856	0.29607	0.00429	-	0.17	1820	39	1738	18	1672	21	92	1820	39	Wu et al. (2010)
J188-014	0.07551	0.00135	1.27518	0.02498	0.12248	0.0018	-	0.55	1082	37	835	11	745	10	69	745	10	Wu et al. (2010)
J188-015	0.15837	0.00235	8.57146	0.14675	0.39258	0.00565	-	0.54	2438	26	2294	16	2135	26	88	2438	26	Wu et al. (2010)
J188-016	0.08446	0.00183	1.47318	0.03304	0.12652	0.00186	-	1.61	1303	43	919	14	768	11	59	768	11	Wu et al. (2010)
J188-017	0.0725	0.00173	1.66288	0.04159	0.16639	0.00269	-	0.14	1000	50	994	16	992	15	99	992	15	Wu et al. (2010)
J188-018	0.06685	0.00596	1.26472	0.10824	0.13722	0.00458	-	1.53	833	193	830	49	829	26	100	829	26	Wu et al. (2010)
J188-019	0.07097	0.00181	1.57	0.04088	0.16046	0.00254	-	2.25	957	53	958	16	959	14	100	959	14	Wu et al. (2010)
J188-020	0.08022	0.00226	2.2512	0.06348	0.20355	0.00331	-	0.89	1202	57	1197	20	1194	18	99	1202	57	Wu et al. (2010)
J188-021	0.16776	0.00673	11.143	0.43931	0.48221	0.00907	-	0.83	2535	69	2535	37	2537	39	100	2535	69	Wu et al. (2010)
J188-022	0.07212	0.0023	1.65215	0.05343	0.16625	0.00291	-	0.39	989	66	990	20	991	16	100	991	16	Wu et al. (2010)
J188-023	0.06067	0.00107	0.85209	0.01653	0.10188	0.00149	-	0.54	628	39	626	9	625	9	100	625	9	Wu et al. (2010)
J188-024	0.06498	0.00137	1.13889	0.02611	0.12713	0.00206	-	1.36	774	45	772	12	771	12	100	771	12	Wu et al. (2010)
J188-025	0.10045	0.00209	2.78802	0.06073	0.20134	0.00303	-	0.59	1632	40	1352	16	1183	16	72	1632	40	Wu et al. (2010)
J188-026	0.15884	0.0037	8.83552	0.2209	0.40349	0.00712	-	1.16	2443	40	2321	23	2185	33	89	2443	40	Wu et al. (2010)
J188-027	0.08433	0.00207	2.61337	0.06648	0.22478	0.00367	-	0.91	1300	49	1304	19	1307	19	101	1300	49	Wu et al. (2010)
J188-028	0.07312	0.00175	1.71382	0.04281	0.16999	0.00274	-	0.49	1017	50	1014	16	1012	15	100	1017	50	Wu et al. (2010)
J188-029	0.06973	0.00304	1.47785	0.06266	0.1538	0.00311	-	1.34	920	92	921	26	922	17	100	922	17	Wu et al. (2010)
J188-030	0.07818	0.00266	2.11641	0.07227	0.19633	0.00363	-	0.64	1151	69	1154	24	1156	20	100	1151	69	Wu et al. (2010)
J188-031	0.07285	0.00122	1.6973	0.032	0.16901	0.00251	-	0.11	1010	35	1008	12	1007	14	100	1010	35	Wu et al. (2010)
J188-032	0.07831	0.00164	2.12397	0.04813	0.19675	0.00316	-	0.74	1155	43	1157	16	1158	17	100	1155	43	Wu et al. (2010)
J188-033	0.06519	0.00229	1.18321	0.04129	0.13165	0.00241	-	1.29	780	76	793	19	797	14	102	797	14	Wu et al. (2010)
J188-034	0.08034	0.00302	2.27334	0.08417	0.20526	0.00382	-	0.31	1205	76	1204	26	1204	20	100	1205	76	Wu et al. (2010)
J188-035	0.07768	0.00202	2.04119	0.05424	0.19061	0.00303	-	0.85	1139	53	1129	18	1125	16	99	1139	53	Wu et al. (2010)
J188-036	0.07495	0.0034	1.28317	0.05685	0.12417	0.00249	-	0.6	1067	93	838	25	755	14	71	755	14	Wu et al. (2010)
J188-037	0.07202	0.00194	1.65574	0.04591	0.16676	0.00279	-	0.64	987	56	992	18	994	15	101	994	15	Wu et al. (2010)
J188-038	0.07172	0.00147	1.61662	0.03515	0.1635	0.0025	-	0.97	978	43	977	14	976	14	100	976	14	Wu et al. (2010)
J188-039	0.15745	0.0027	10.2828	0.19737	0.4738	0.00732	-	0.47	2428	30	2461	18	2500	32	103	2428	30	Wu et al. (2010)
J188-040	0.07705	0.0022	2.02033	0.05961	0.19016	0.00345	-	1.35	1122	58	1122	20	1122	19	100	1122	58	Wu et al. (2010)
J188-041	0.0738	0.00121	1.76277	0.0334	0.17326	0.00267	-	0.57	1036	34	1032	12	1030	15	99	1036	34	Wu et al. (2010)
J188-042	0.10583	0.00235	4.61649	0.10756	0.31644	0.00502	-	0.79	1729	42	1752	19	1772	25	102	1729	42	Wu et al. (2010)
J188-043	0.0718	0.00312	1.63271	0.06972	0.16475	0.00332	-	0.56	980	91	983	27	983	18	100	983	18	Wu et al. (2010)
J188-044	0.0613	0.00213	0.89213	0.03095	0.10561	0.00197	-	0.66	650	76	648	17	647	11	100	647	11	Wu et al. (2010)
J188-045	0.07527	0.0027	1.74186	0.06117	0.16792	0.00302	-	1.3	1076	74	1024	23	1001	17	93	1076	74	Wu et al. (2010)
J188-046	0.15297	0.00457	6.75106	0.20484	0.32015	0.00568	-	0.13	2379	52	2079	27	1790	28	75	2379	52	Wu et al. (2010)
J188-047	0.19458	0.00317	12.0243	0.2245	0.44827	0.00689	-	1.31	2781	27	2606	18	2388	31	86	2781	27	Wu et al. (2010)
J188-048	0.07184	0.00261	1.62933	0.05848	0.16462	0.00309	-	1.1	981	76	982	23	982	17	100	982	17	Wu et al. (2010)
J188-049	0.07656	0.00203	1.97306	0.05302	0.18693	0.00305	-	0.44	1110	54	1106	18	1105	17	100	1110	54	Wu et al. (2010)
J188-050	0.07255	0.00267	1.58889	0.05946	0.15882	0.00313	-	0.21	1001	77	966	23	950	17	95	950	17	Wu et al. (2010)
J188-051	0.0683	0.0021	1.36609	0.04209	0.14515	0.00252	-	0.65	878	65	874	18	874	14	100	874	14	Wu et al. (2010)
J188-052	0.11051	0.00296	4.46733	0.12147	0.2932	0.00483	-	1.42	1808	50	1725	23	1658	24	92	1808	50	Wu et al. (2010)
J188-053	0.07132	0.00128	1.59021	0.03174	0.16182	0.00247	-	1.48	967	37	966	12	967	14	100	967	14	Wu et al. (2010)
J188-054	0.15931	0.00257	9.27149	0.17192	0.42215	0.00662	-	1.21	2448	28	2365	17	2270	30	93	2448	28	Wu et al. (2010)
J188-055	0.07166	0.00142	1.60912	0.03417	0.16293	0.00246	-	0.77	976	41	974	13	973	14	100	973	14	Wu et al. (2010)
J188-056	0.07941	0.00202	2.20315	0.05937	0.20122	0.00358	-	0.95	1182	51	1182	19	1182	19	100	1182	51	Wu et al. (2010)
J188-057	0.19364	0.0043	14.427	0.3434	0.54048	0.0088	-	0.53	2773	37	2778	23	2785	37	100	2773	37	Wu et al. (2010)
J188-058	0.06918	0.00139	1.42968	0.03095	0.14999	0.0023	-	0.2	904	42	901	13	901	13	100	901	13	Wu et al. (2010)
J188-059	0.08544	0.00251	2.68642	0.08087	0.22793	0.00423	-	1.44	1326	58	1325	22	1324	22	100	1326	58	Wu et al. (2010)
J188-060	0.0721	0.00176	1.64869	0.04201	0.16593	0.00268	-	0.02	989	51	989	16	990	15	100	990	15	Wu et al. (2010)
J188-061	0.07328	0.00195	1.74625	0.04823	0.17279	0.00303	-	0.69	1022	55	1026	18	1027	17	100	1022	55	Wu et al. (2010)
J188-062	0.07852	0.00363	2.14031	0.09764	0.19775	0.00426	-	0.66	1160	94	1162	32	1163	23	100	1160	94	Wu et al. (2010)
J188-063	0.07386	0.0026	1.76876	0.06249	0.17383	0.00332	-	1.8	1038	73	1034	23	1033	18	100	1038	73	Wu et al. (2010)
J188-064	0.08158	0.00184	2.38401	0.05791	0.21194	0.00354	-	0.48	1235	45	1238	17	1239	19	100	1235	45	Wu et al. (2010)
J188-065	0.06458	0.00192	1.12229	0.03402	0.12612	0.0022	-	1.65	761	64	764	16	766	13	101	766	13	Wu et al. (2010)
J188-066	0.09367	0.00579	3.40229	0.20452	0.26359	0.00696	-	1.12	1501	120	1505	47	1508	36	100	1501	120	Wu et al. (2010)
J188-067	0.07338	0.00247	1.75025	0.05986	0.17313	0.00312	-	0.18	1024	70	1027	22	1029	17	100	1024	70	Wu et al. (2010)
J188-068	0.07804	0.00277	2.11222	0.07462	0.19623	0.00363	-	0.2	1148	72	1153	24	1155	20	101	1148	72	Wu et al. (2010)
J188-069	0.07339	0.00313	1.75048	0.07309	0.17307	0.00356	-	0.92	1025	88	1027	27	1029	20	100	1025	88	Wu et al. (2010)
J188-070	0.07391	0.00264	1.76781	0.06259	0.17355	0.00324	-	0.31	1039	74	1034	23	1032	18	99	1039	74	Wu et al. (2010)
J188-071	0.0684	0.00291	1.39145	0.05813	0.14765	0.00305	-	0.33	881	90	885	25	888	17	101	888	17	Wu et al. (2010)
J188-072	0.16226	0.00657	10.1358	0.40351	0.45309	0.009	-	0.93	2479	70	2447	37	2409	40	97	2479	70	Wu et al. (2010)
J188-073	0.07342	0.00203	1.81791	0.05162	0.17962	0.00309	-	0.27	1026	57	1052	19	1065	17	104	1026	57	Wu et al. (2010)
J188-074	0.08182	0.00245	2.31415	0.07037	0.20518	0.00366	-	0.17	1241	60	1217	22	1203	20	97	1241	60	Wu et al. (2010)
J188-075	0.07299	0.00308	1.74463	0.07232	0.17343	0.00358	-	0.93	1014	88	1025	27	1031	20	102	1014	88	Wu et al. (2010)
J188-076	0.07461	0.00323	1.83271	0.07803	0.17809	0.00376	-	0.83	1058	89	1057	28	1057	21	100	1058	89	Wu et al. (2010)
J188-077	0.07387	0.00253	1.77094	0.06049	0.17387	0.00323	-	0.39	1038	71	1035	22	1033	18	100	1038	71	Wu et al. (2010)
J188-078	0.07481	0.00332	1.84623	0.08016	0.17908	0.00379	-	0.32	1063	92	1062	29	1062	21	100	1063	92	Wu et al. (2010)
J188-079	0.07131	0.00238	1.59527	0.05355	0.16224	0.00299	-	0.38	966	70	968	21	969	17	100	969	17	Wu et al. (2010)
J188-080	0.10625	0.00393	4.50007	0.16637	0.30715	0.00595	-	0.03	1736	69	1731	31	1727	29	99	1736	69	Wu et al. (2010)
J188-081	0.07461	0.00308	1.91736	0.0779	0.18639	0.0038	-	0.23	1058	85	1087	27	1102	21	104	1058	85	Wu et al. (2010)
J188-082	0.09724	0.0028	3.70782	0.10977	0.27666	0.00487	-	0.05	1572	55	1573	24	1575	25	100	1572	55	Wu et al. (2010)
J188-083	0.08025	0.00355	2.2546	0.09743	0.20386	0.00445	-	0.68	1203	89	1198	30	1196	24	99	1203	89	Wu et al. (2010)
J188-084	0.07004	0.00276	1.48801	0.05833	0.15404	0.00312	-	0.62	930	83	926	24	924	17	99	924	17	Wu et al. (2010)
J188-085	0.19198	0.00705	14.2134	0.52345	0.53747	0.01059	-	0.7	2759	62	2764	35	2773	44	101	2759	62	Wu et al. (2010)
J188-086	0.07349	0.00218	1.30168	0.03859	0.12847	0.00217	-	1.38	1027	61	846	17	779	12	76	779	12	Wu et al. (2010)
J188-087	0.09745	0.00284	3.70311	0.11025	0.27579	0.0049	-	0.56	1576	56	1572	24	1570	25	100	1576	56	Wu et al. (2010)
J188-088	0.07791	0.0043	2.13497	0.11148	0.19893	0.00456	-	0.58	1145	113	1160	36	1170	25	102	1145	113	Wu et al. (2010)
J188-089	0.07294	0.00253	1.72033	0.06054	0.17107	0.00332	-	0.11	1012	72	1016	23	1018	18	101	1012	72	Wu et al. (2010)
J188-090	0.13269	0.00753	7.13491	0.38569	0.39032	0.0115	-	0.11	2134	102	2128	48	2124	53	100	2134	102	Wu et al. (2010)
J188-091	0.15589	0.00698	6.88668	0.29785	0.3204	0.00649	-	1.07	2412	78	2097	38	1792	32	74	2412	78	Wu et al. (2010)
J188-092	0.08927	0.00384	2.98183	0.12338	0.2427	0.0049	-	0.68	1410	84	1403	31	1401	25	99	1410	84	Wu et al. (2010)
J188-093	0.08008	0.00223	2.19889	0.06197	0.19914	0.00342	-	0.72	1199	56	1181	20	1171	18	98	1199	56	Wu et al. (2010)
J188-094	0.19409	0.00454	14.4225	0.34697	0.53882	0.00909	-	0.78	2777	39	2778	23	2779	38	100	2777	39	Wu et al. (2010)
J188-095	0.06221	0.00234	0.95856	0.03553	0.11161	0.00209	-	0.46	681	82	683	18	682	12	100	682	12	Wu et al. (2010)
J188-096	0.06444	0.0019	1.08035	0.03206	0.12153	0.00205	-	1.3	756	64	744	16	739	12	98	739	12	Wu et al. (2010)
J188-097	0.125	0.00289	6.34506	0.15308	0.36803	0.00614	-	1.99	2029	42	2025	21	2020	29	100	2029	42	Wu et al. (2010)
J188-098	0.0668	0.0016	1.32665	0.03381	0.14408	0.00242	-	0.12	832	51	857	15	868	14	104	868	14	Wu et al. (2010)
J188-099	0.08765	0.00225	2.46752	0.06488	0.20431	0.00331	-	0.77	1375	51	1263	19	1198	18	87	1375	51	Wu et al. (2010)
J188-100	0.08889	0.00294	2.99689	0.09928	0.24461	0.00463	-	0.65	1402	65	1407	25	1411	24	101	1402	65	Wu et al. (2010)
J188-101	0.15516	0.00413	8.39078	0.22763	0.39219	0.00652	-	0.42	2404	46	2274	25	2133	30	89	2404	46	Wu et al. (2010)
J188-102	0.09061	0.00279	3.11918	0.09716	0.24973	0.00469	-	1.76	1438	60	1437	24	1437	24	100	1438	60	Wu et al. (2010)
J188-103	0.06757	0.00214	1.31706	0.04246	0.14139	0.00263	-	1.12	855	67	853	19	853	15	100	853	15	Wu et al. (2010)
J188-104	0.07421	0.00189	1.88659	0.05045	0.18443	0.00319	-	1.31	1047	53	1076	18	1091	17	104	1047	53	Wu et al. (2010)
J188-105	0.07818	0.00374	2.12087	0.09888	0.1968	0.00447	-	1.73	1151	97	1156	32	1158	24	101	1151	97	Wu et al. (2010)
J188-106	0.0775	0.00194	2.04763	0.05358	0.19168	0.00325	-	0.92	1134	51	1132	18	1130	18	100	1134	51	Wu et al. (2010)
J188-107	0.0708	0.00201	1.55174	0.04518	0.159	0.00281	-	0.57	952	59	951	18	951	16	100	951	16	Wu et al. (2010)
J188-108	0.07063	0.00219	1.40283	0.0436	0.14405	0.00258	-	0.99	947	65	890	18	868	15	92	868	15	Wu et al. (2010)
J188-109	0.0896	0.00194	2.97797	0.06925	0.24106	0.00396	-	1.32	1417	42	1402	18	1392	21	98	1417	42	Wu et al. (2010)
J188-110	0.16641	0.00313	11.1346	0.2358	0.48532	0.00785	-	0.2	2522	32	2534	20	2550	34	101	2522	32	Wu et al. (2010)
J188-111	0.06509	0.00134	1.15286	0.02593	0.12847	0.00208	-	0.37	777	44	779	12	779	12	100	779	12	Wu et al. (2010)
J188-112	0.19154	0.00313	15.4299	0.29384	0.58433	0.00912	-	2.35	2755	27	2842	18	2966	37	108	2755	27	Wu et al. (2010)
J188-113	0.10251	0.00325	4.11923	0.13049	0.29146	0.00528	-	0.67	1670	60	1658	26	1649	26	99	1670	60	Wu et al. (2010)
J188-114	0.09742	0.00314	3.71459	0.12138	0.27661	0.00532	-	0.87	1575	62	1575	26	1574	27	100	1575	62	Wu et al. (2010)
J188-115	0.07191	0.00318	1.65445	0.07154	0.16681	0.00345	-	1	983	92	991	27	995	19	101	995	19	Wu et al. (2010)
J188-116	0.16155	0.00502	9.57858	0.29955	0.42999	0.00774	-	0.35	2472	54	2395	29	2306	35	93	2472	54	Wu et al. (2010)
J188-117	0.11617	0.00424	5.49958	0.19768	0.34324	0.00676	-	0.8	1898	67	1901	31	1902	32	100	1898	67	Wu et al. (2010)
J188-118	0.12559	0.00448	6.39046	0.22892	0.36923	0.00732	-	0.43	2037	65	2031	31	2026	34	99	2037	65	Wu et al. (2010)
J188-119	0.07144	0.00201	1.60195	0.04596	0.1626	0.00277	-	0.81	970	59	971	18	971	15	100	971	15	Wu et al. (2010)
J188-120	0.19923	0.00488	14.9748	0.38207	0.54511	0.00888	-	1.33	2820	41	2814	24	2805	37	99	2820	41	Wu et al. (2010)
J188-121	0.07622	0.00326	1.94925	0.08253	0.18566	0.00401	-	0.8	1101	88	1098	28	1098	22	100	1101	88	Wu et al. (2010)
J188-122	0.08818	0.00529	2.51509	0.14667	0.20713	0.00548	-	0.33	1386	118	1276	42	1214	29	88	1386	118	Wu et al. (2010)
J188-123	0.07429	0.00212	1.45306	0.04296	0.14188	0.00254	-	0.46	1049	59	911	18	855	14	82	1049	59	Wu et al. (2010)
J188-124	0.06533	0.00198	1.16676	0.03581	0.12956	0.00228	-	0.17	785	65	785	17	785	13	100	785	13	Wu et al. (2010)
J188-125	0.17229	0.00438	11.7053	0.31294	0.4927	0.00857	-	0.41	2580	43	2581	25	2582	37	100	2580	43	Wu et al. (2010)
J188-126	0.16619	0.00474	10.9324	0.32031	0.47707	0.00865	-	0.77	2520	49	2517	27	2514	38	100	2520	49	Wu et al. (2010)
J188-127	0.16788	0.00608	11.4082	0.40789	0.4927	0.00946	-	1.22	2537	62	2557	33	2582	41	102	2537	62	Wu et al. (2010)
J188-128	0.09489	0.00292	3.48417	0.10964	0.26634	0.00488	-	0.54	1526	59	1524	25	1522	25	100	1526	59	Wu et al. (2010)
J188-129	0.08133	0.00173	2.3455	0.05444	0.20917	0.00338	-	0.35	1229	43	1226	17	1224	18	100	1229	43	Wu et al. (2010)
J188-130	0.1599	0.00287	10.2131	0.20597	0.46333	0.00713	-	0.2	2455	31	2454	19	2454	31	100	2455	31	Wu et al. (2010)
J188-131	0.16503	0.00446	10.7601	0.30311	0.47299	0.00832	-	0.1	2508	47	2503	26	2497	36	100	2508	47	Wu et al. (2010)
J188-132	0.10844	0.00332	4.74435	0.14893	0.31734	0.00577	-	1.02	1773	57	1775	26	1777	28	100	1773	57	Wu et al. (2010)
J200 N25°24'27.1" E114°18'36.4"				Early Cambrian
J200-01	0.09968	0.00148	3.94477	0.06282	0.287	0.00369	-	3.58	1618	28	1623	13	1627	18	101	1618	28	Wu et al. (2010)
J200-02	0.11279	0.00164	5.11276	0.0756	0.32894	0.00386	-	0.73	1845	27	1838	13	1833	19	99	1845	27	Wu et al. (2010)
J200-03	0.10372	0.00126	4.04779	0.05604	0.28314	0.00356	-	0.02	1692	23	1644	11	1607	18	95	1692	23	Wu et al. (2010)
J200-04	0.17485	0.0028	11.6343	0.19397	0.48278	0.006	-	0.66	2605	27	2575	16	2539	26	97	2605	27	Wu et al. (2010)
J200-05	0.09874	0.00165	3.7303	0.06452	0.27409	0.00347	-	0.85	1600	32	1578	14	1562	18	98	1600	32	Wu et al. (2010)
J200-06	0.09936	0.00181	3.81691	0.07371	0.27855	0.00391	-	2.66	1612	35	1596	16	1584	20	98	1612	35	Wu et al. (2010)
J200-07	0.07283	0.00171	1.41774	0.03224	0.14126	0.00183	-	1.47	1009	49	896	14	852	10	84	852	10	Wu et al. (2010)
J200-08	0.07777	0.00102	2.12685	0.03055	0.19841	0.00242	-	0.65	1141	27	1158	10	1167	13	102	1141	27	Wu et al. (2010)
J200-09	0.07248	0.00172	1.6629	0.03918	0.16642	0.00227	-	1.35	999	49	994	15	992	13	99	992	13	Wu et al. (2010)
J200-10	0.06371	0.00161	0.79127	0.02031	0.09008	0.00136	-	1.41	732	55	592	12	556	8	76	556	8	Wu et al. (2010)
J200-11	0.09794	0.00176	3.76957	0.0668	0.27916	0.0034	-	0.45	1585	34	1586	14	1587	17	100	1585	34	Wu et al. (2010)
J200-12	0.07272	0.0013	1.60524	0.02992	0.16011	0.00217	-	2.95	1006	37	972	12	957	12	95	957	12	Wu et al. (2010)
J200-13	0.07268	0.00089	1.60508	0.0217	0.16017	0.00194	-	0.26	1005	25	972	8	958	11	95	958	11	Wu et al. (2010)
J200-15	0.16098	0.00212	9.99288	0.14539	0.45019	0.00572	-	1.55	2466	23	2434	13	2396	25	97	2466	23	Wu et al. (2010)
J200-16	0.07232	0.00103	1.59648	0.02512	0.16012	0.0021	-	0.51	995	30	969	10	957	12	96	957	12	Wu et al. (2010)
J200-17	0.07235	0.00104	1.60129	0.02476	0.16051	0.00204	-	0.64	996	30	971	10	960	11	96	960	11	Wu et al. (2010)
J200-18	0.07292	0.00109	1.607	0.02564	0.15984	0.00204	-	0.22	1012	31	973	10	956	11	94	956	11	Wu et al. (2010)
J200-19	0.16303	0.00233	9.81043	0.15671	0.43648	0.00594	-	1.42	2487	25	2417	15	2335	27	94	2487	25	Wu et al. (2010)
J200-20	0.15455	0.00242	7.27914	0.11827	0.34153	0.00424	-	0.04	2397	27	2146	15	1894	20	79	2397	27	Wu et al. (2010)
J200-21	0.1647	0.00255	10.7622	0.18407	0.47399	0.00667	-	1.05	2504	27	2503	16	2501	29	100	2504	27	Wu et al. (2010)
J200-22	0.26359	0.00437	24.0259	0.43515	0.66108	0.00941	-	0.58	3268	27	3269	18	3271	37	100	3268	27	Wu et al. (2010)
J200-23	0.07359	0.00111	1.86872	0.03021	0.18418	0.00238	-	0.93	1030	31	1070	11	1090	13	106	1030	31	Wu et al. (2010)
J200-24	0.07014	0.00176	1.49059	0.03679	0.15419	0.0022	-	1.07	932	53	927	15	924	12	99	924	12	Wu et al. (2010)
J200-25	0.0729	0.00263	1.69562	0.0597	0.16891	0.00278	-	0.13	1011	75	1007	22	1006	15	100	1011	75	Wu et al. (2010)
J200-26	0.07121	0.00162	1.56488	0.03569	0.15939	0.00225	-	0.92	963	48	956	14	953	13	99	953	13	Wu et al. (2010)
J200-27	0.0746	0.00167	1.82407	0.04094	0.1774	0.00242	-	0.61	1058	46	1054	15	1053	13	100	1058	46	Wu et al. (2010)
J200-28	0.0978	0.00243	3.54888	0.08793	0.26341	0.00378	-	1.61	1583	48	1538	20	1507	19	95	1583	48	Wu et al. (2010)
J200-29	0.06606	0.00578	1.09219	0.0919	0.11992	0.0037	-	0.72	808	190	750	45	730	21	90	730	21	Wu et al. (2010)
J200-30	0.16516	0.00263	10.8516	0.18155	0.47676	0.006	-	1.45	2509	27	2510	16	2513	26	100	2509	27	Wu et al. (2010)
J200-31	0.09801	0.00268	3.65305	0.10064	0.27018	0.00443	-	0.13	1587	52	1561	22	1542	22	97	1587	52	Wu et al. (2010)
J200-32	0.06981	0.00177	1.48501	0.03758	0.15429	0.00213	-	0.14	923	53	924	15	925	12	100	925	12	Wu et al. (2010)
J200-33	0.06817	0.00157	1.30931	0.03097	0.13931	0.00201	-	0.17	874	49	850	14	841	11	96	841	11	Wu et al. (2010)
J200-34	0.07977	0.00442	1.94705	0.10669	0.17769	0.00399	-	0.2	1191	112	1097	37	1054	22	88	1191	112	Wu et al. (2010)
J200-35	0.05912	0.00698	0.73404	0.08401	0.0901	0.00324	-	2.57	572	267	559	49	556	19	97	556	19	Wu et al. (2010)
J200-36	0.15523	0.00533	9.61938	0.33413	0.44953	0.00806	-	0.16	2404	60	2399	32	2393	36	100	2404	60	Wu et al. (2010)
J200-37	0.0894	0.00359	2.81631	0.11165	0.22845	0.00483	-	0.09	1413	79	1360	30	1326	25	94	1413	79	Wu et al. (2010)
J200-38	0.18434	0.00359	13.1508	0.25997	0.51767	0.00723	-	1.11	2692	33	2691	19	2689	31	100	2692	33	Wu et al. (2010)
J200-39	0.14422	0.00319	8.56318	0.19193	0.43076	0.0063	-	0.53	2278	39	2293	20	2309	28	101	2278	39	Wu et al. (2010)
J200-40	0.14501	0.00307	8.50362	0.18563	0.42541	0.00652	-	0.51	2288	37	2286	20	2285	29	100	2288	37	Wu et al. (2010)
J200-41	0.17588	0.0035	12.0124	0.24689	0.49536	0.00719	-	0.39	2614	34	2605	19	2594	31	99	2614	34	Wu et al. (2010)
J200-43	0.07096	0.00197	1.65587	0.04536	0.16919	0.00249	-	0.81	956	58	992	17	1008	14	105	956	58	Wu et al. (2010)
J200-44	0.07179	0.00261	1.6604	0.05872	0.16785	0.00294	-	0.99	980	76	994	22	1000	16	102	980	76	Wu et al. (2010)
J200-45	0.07388	0.00266	1.74114	0.06112	0.17096	0.00305	-	0.62	1038	74	1024	23	1017	17	98	1038	74	Wu et al. (2010)
J200-46	0.17483	0.01003	12.4651	0.69459	0.51713	0.01182	-	1.96	2604	98	2640	52	2687	50	103	2604	98	Wu et al. (2010)
J200-47	0.07202	0.00224	1.63596	0.05025	0.16482	0.00267	-	0.55	987	65	984	19	984	15	100	984	15	Wu et al. (2010)
J200-48	0.1017	0.00345	3.98322	0.13228	0.2841	0.00481	-	0.42	1655	64	1631	27	1612	24	97	1655	64	Wu et al. (2010)
J200-49	0.08314	0.00196	2.5092	0.06044	0.21893	0.00329	-	0.59	1273	47	1275	17	1276	17	100	1273	47	Wu et al. (2010)
J200-50	0.07582	0.00288	1.37196	0.05102	0.13134	0.00237	-	0.35	1090	78	877	22	796	14	73	796	14	Wu et al. (2010)
J200-51	0.0592	0.00264	0.76549	0.03315	0.09379	0.0018	-	2.08	574	99	577	19	578	11	101	578	11	Wu et al. (2010)
J200-52	0.07168	0.00214	1.61284	0.04747	0.16328	0.00264	-	2.84	977	62	975	18	975	15	100	975	15	Wu et al. (2010)
J200-53	0.0638	0.00166	1.04118	0.02702	0.11845	0.0018	-	1.44	735	56	725	13	722	10	98	722	10	Wu et al. (2010)
J200-54	0.07129	0.00279	1.59609	0.06031	0.16248	0.00296	-	0.19	966	82	969	24	971	16	101	971	16	Wu et al. (2010)
J200-55	0.07497	0.00364	1.70557	0.07901	0.16513	0.00348	-	1.29	1068	100	1011	30	985	19	92	985	19	Wu et al. (2010)
J200-56	0.15886	0.00333	10.0391	0.21485	0.45835	0.00651	-	0.17	2444	36	2438	20	2432	29	100	2444	36	Wu et al. (2010)
J200-57	0.06491	0.00188	1.13769	0.03279	0.12716	0.00204	-	3.84	771	62	771	16	772	12	100	772	12	Wu et al. (2010)
J200-58	0.07452	0.00184	1.84673	0.04687	0.17977	0.00292	-	0.33	1056	51	1062	17	1066	16	101	1056	51	Wu et al. (2010)
J200-59	0.06652	0.00153	1.2501	0.02909	0.13632	0.00196	-	0.73	823	49	823	13	824	11	100	824	11	Wu et al. (2010)
J200-60	0.16432	0.00314	10.7676	0.21687	0.47536	0.00687	-	1.17	2501	33	2503	19	2507	30	100	2501	33	Wu et al. (2010)
J200-61	0.14863	0.00536	8.93225	0.31968	0.43581	0.00846	-	0.43	2330	63	2331	33	2332	38	100	2330	63	Wu et al. (2010)
J200-62	0.0712	0.00158	1.59248	0.03644	0.16226	0.00243	-	1.05	963	46	967	14	969	13	101	969	13	Wu et al. (2010)
J200-63	0.06054	0.00163	0.84529	0.02295	0.10128	0.00157	-	0.71	623	59	622	13	622	9	100	622	9	Wu et al. (2010)
J200-64	0.15128	0.00577	9.27458	0.33381	0.44466	0.0079	-	1.53	2360	67	2366	33	2371	35	100	2360	67	Wu et al. (2010)
J200-65	0.16501	0.00715	10.7502	0.44005	0.47212	0.009	-	0.56	2508	75	2502	38	2493	39	99	2508	75	Wu et al. (2010)
J200-66	0.07659	0.00275	1.97354	0.07042	0.18693	0.00332	-	0.82	1111	73	1107	24	1105	18	99	1111	73	Wu et al. (2010)
J200-67	0.06442	0.00113	1.08988	0.02019	0.12271	0.00166	-	0.87	755	38	748	10	746	10	99	746	10	Wu et al. (2010)
J200-68	0.06995	0.00126	1.57868	0.02989	0.16368	0.00223	-	0.44	927	38	962	12	977	12	105	977	12	Wu et al. (2010)
J200-69	0.15924	0.00353	9.79107	0.22165	0.44594	0.00656	-	1.17	2448	38	2415	21	2377	29	97	2448	38	Wu et al. (2010)
J200-70	0.06655	0.00238	1.2495	0.04399	0.13619	0.00249	-	0.67	824	76	823	20	823	14	100	823	14	Wu et al. (2010)
J200-71	0.07141	0.00178	1.6661	0.04214	0.16929	0.00263	-	0.9	969	52	996	16	1008	14	104	969	52	Wu et al. (2010)
J200-72	0.06542	0.00265	1.02419	0.04025	0.11336	0.00229	-	0.73	788	87	716	20	692	13	88	692	13	Wu et al. (2010)
J200-73	0.16528	0.00408	11.0828	0.27913	0.48674	0.00762	-	0.41	2510	42	2530	23	2557	33	102	2510	42	Wu et al. (2010)
J200-74	0.06666	0.00321	1.17661	0.05451	0.12834	0.00274	-	1.81	827	103	790	25	778	16	94	778	16	Wu et al. (2010)
J200-75	0.07149	0.00191	1.77475	0.04774	0.18009	0.00282	-	0.2	971	56	1036	17	1067	15	110	971	56	Wu et al. (2010)
J200-76	0.06663	0.00189	1.27514	0.03618	0.13883	0.00222	-	0.52	826	61	835	16	838	13	101	838	13	Wu et al. (2010)
J200-77	0.0952	0.00218	3.5232	0.08092	0.2684	0.00384	-	0.34	1532	44	1532	18	1533	20	100	1532	44	Wu et al. (2010)
J200-002a	0.06504	0.00274	1.15184	0.04798	0.12852	0.00262	-	0.06	776	91	778	23	779	15	100	779	15	Wu et al. (2010)
J200-003a	0.0712	0.00297	1.55195	0.06384	0.15797	0.00309	-	0.08	963	87	951	25	945	17	98	945	17	Wu et al. (2010)
J200-004a	0.10018	0.00322	3.95078	0.12701	0.2861	0.00525	-	1.93	1627	61	1624	26	1622	26	100	1627	61	Wu et al. (2010)
J200-005a	0.0744	0.00379	1.857	0.09137	0.18156	0.00408	-	0.91	1052	105	1066	32	1075	22	102	1052	105	Wu et al. (2010)
J200-006a	0.15527	0.00475	9.58636	0.29589	0.4482	0.00764	-	0.18	2405	53	2396	28	2387	34	99	2405	53	Wu et al. (2010)
J200-007a	0.06021	0.00251	0.82479	0.03392	0.09944	0.00185	-	2.2	611	92	611	19	611	11	100	611	11	Wu et al. (2010)
J200-008a	0.20075	0.00712	15.3117	0.54238	0.55349	0.00993	-	1.25	2832	59	2835	34	2840	41	100	2832	59	Wu et al. (2010)
J200-009a	0.07362	0.00531	1.7727	0.12426	0.17483	0.00522	-	0.21	1031	150	1036	46	1039	29	101	1031	150	Wu et al. (2010)
J200-010a	0.11045	0.00503	4.89575	0.2179	0.32172	0.00695	-	1.38	1807	85	1802	38	1798	34	100	1807	85	Wu et al. (2010)
J200-011a	0.06723	0.00313	1.29977	0.05932	0.14031	0.00292	-	0.7	845	99	846	26	846	17	100	846	17	Wu et al. (2010)
J200-012a	0.06035	0.00332	0.73731	0.0397	0.08859	0.00203	-	1.33	616	122	561	23	547	12	89	547	12	Wu et al. (2010)
J200-013a	0.05955	0.00829	0.7513	0.10046	0.09225	0.00415	-	1.53	587	316	569	58	569	24	97	569	24	Wu et al. (2010)
J200-014a	0.06868	0.00388	1.39388	0.07646	0.14729	0.00349	-	1.43	889	120	886	32	886	20	100	886	20	Wu et al. (2010)
J200-015a	0.07105	0.00468	1.35098	0.0868	0.13789	0.00368	-	0.62	959	139	868	37	833	21	87	833	21	Wu et al. (2010)
J200-016a	0.06555	0.00229	1.18791	0.0418	0.13144	0.00237	-	0.32	792	75	795	19	796	14	101	796	14	Wu et al. (2010)
J200-017a	0.1712	0.00872	11.4551	0.5756	0.48527	0.01115	-	0.87	2569	87	2561	47	2550	48	99	2569	87	Wu et al. (2010)
J200-018a	0.06987	0.00183	1.48167	0.03977	0.15388	0.00249	-	0.93	925	55	923	16	923	14	100	923	14	Wu et al. (2010)
J200-019a	0.17745	0.00481	6.56264	0.18471	0.26823	0.00459	-	0.29	2629	46	2054	25	1532	23	58	2629	46	Wu et al. (2010)
J200-020a	0.07256	0.00176	1.68085	0.04272	0.168	0.0027	-	0.55	1002	50	1001	16	1001	15	100	1002	50	Wu et al. (2010)
J200-021a	0.14698	0.01013	8.39557	0.54975	0.41615	0.01195	-	0.61	2311	122	2275	59	2243	54	97	2311	122	Wu et al. (2010)
J200-022a	0.07273	0.00373	1.69061	0.08492	0.16854	0.00381	-	0.22	1006	107	1005	32	1004	21	100	1006	107	Wu et al. (2010)
J200-023a	0.09612	0.00337	3.58999	0.12561	0.27084	0.00511	-	1.48	1550	67	1547	28	1545	26	100	1550	67	Wu et al. (2010)
J200-024a	0.13241	0.00352	7.13279	0.19455	0.39071	0.00663	-	1.14	2130	48	2128	24	2126	31	100	2130	48	Wu et al. (2010)
J200-025a	0.07374	0.00321	1.75817	0.07545	0.17288	0.0036	-	0.44	1034	90	1030	28	1028	20	99	1034	90	Wu et al. (2010)
J200-026a	0.07069	0.00214	1.54192	0.04712	0.15823	0.0027	-	0.52	948	63	947	19	947	15	100	947	15	Wu et al. (2010)
J200-027a	0.06741	0.00563	1.26748	0.10204	0.13628	0.00448	-	0.23	850	180	831	46	824	25	97	824	25	Wu et al. (2010)
J200-028a	0.06081	0.00247	0.86824	0.03475	0.10354	0.002	-	0.16	633	90	635	19	635	12	100	635	12	Wu et al. (2010)
J200-029a	0.06968	0.00427	1.47518	0.0875	0.15355	0.00381	-	1.24	919	130	920	36	921	21	100	921	21	Wu et al. (2010)
J200-030a	0.07309	0.00372	1.72666	0.08529	0.17146	0.00375	-	0.99	1016	106	1019	32	1020	21	100	1016	106	Wu et al. (2010)
J200-031a	0.11611	0.00818	5.47906	0.37409	0.34223	0.00977	-	0.77	1897	130	1897	59	1897	47	100	1897	130	Wu et al. (2010)
J200-032a	0.07321	0.00252	1.72532	0.05967	0.17096	0.00323	-	0.64	1020	71	1018	22	1017	18	100	1020	71	Wu et al. (2010)
J200-033a	0.09092	0.0026	3.1439	0.09107	0.25081	0.00441	-	0.72	1445	56	1444	22	1443	23	100	1445	56	Wu et al. (2010)
J200-034a	0.06048	0.0034	0.84796	0.0463	0.10174	0.00239	-	1.8	621	125	624	25	625	14	101	625	14	Wu et al. (2010)
J200-035a	0.10152	0.00789	4.0144	0.29852	0.28725	0.00916	-	0.61	1652	149	1637	60	1628	46	99	1652	149	Wu et al. (2010)
J200-036a	0.07135	0.00298	1.60286	0.06557	0.16295	0.00326	-	0.89	967	87	971	26	973	18	101	973	18	Wu et al. (2010)
J200-037a	0.16957	0.00518	11.3282	0.34734	0.48477	0.0088	-	0.76	2553	52	2551	29	2548	38	100	2553	52	Wu et al. (2010)
J200-038a	0.07114	0.00342	1.57874	0.0739	0.16101	0.00348	-	0.72	961	101	962	29	962	19	100	962	19	Wu et al. (2010)
J200-039a	0.0714	0.00305	1.58539	0.0664	0.16107	0.00323	-	0.52	969	89	964	26	963	18	99	963	18	Wu et al. (2010)
J200-040a	0.11351	0.00401	5.23619	0.18488	0.33465	0.00634	-	0.59	1856	65	1859	30	1861	31	100	1856	65	Wu et al. (2010)
J200-041a	0.17817	0.006	12.3821	0.42137	0.50415	0.00939	-	0.07	2636	57	2634	32	2632	40	100	2636	57	Wu et al. (2010)
J200-042a	0.07162	0.00254	1.61604	0.05724	0.16363	0.00298	-	0.66	975	74	976	22	977	17	100	977	17	Wu et al. (2010)
J200-043a	0.15634	0.00612	9.8145	0.38021	0.45547	0.00877	-	0.11	2416	68	2418	36	2420	39	100	2416	68	Wu et al. (2010)
J200-044a	0.06954	0.00236	0.92302	0.03147	0.09627	0.00171	-	0.51	915	72	664	17	593	10	65	593	10	Wu et al. (2010)
D38-5: Early Cambrian (N25°41′40.791″, E114°16′57.483″)
D38-5-01	0.073	0.0014	1.6122	0.0327	0.159	0.0015	-	0.21	1013	39	975	13	951	8	0.97	951	8	Xiong et al. (2018)
D38-5-02	0.1562	0.003	8.3804	0.252	0.3852	0.008	-	0.14	2417	32	2273	27	2101	37	0.92	2417	32	Xiong et al. (2018)
D38-5-03	0.0712	0.0015	1.6017	0.0335	0.1622	0.0015	-	0.14	963	43	971	13	969	8	0.99	969	8	Xiong et al. (2018)
D38-5-04	0.0695	0.0014	1.5482	0.0314	0.1607	0.0016	-	0.38	922	41	950	13	961	9	0.98	961	9	Xiong et al. (2018)
D38-5-05	0.0698	0.0016	1.5414	0.0354	0.1594	0.0014	-	0.53	924	48	947	14	953	8	0.99	953	8	Xiong et al. (2018)
D38-5-06	0.1126	0.0018	5.4189	0.0909	0.347	0.0032	-	0.16	1843	30	1888	14	1920	15	0.98	1843	30	Xiong et al. (2018)
D38-5-07	0.0692	0.0012	1.3524	0.0217	0.1409	0.001	-	0.1	906	31	869	9	850	6	0.97	850	6	Xiong et al. (2018)
D38-5-08	0.1005	0.0019	4.2428	0.0804	0.3043	0.003	-	0.73	1633	40	1682	16	1713	15	0.98	1633	40	Xiong et al. (2018)
D38-5-09	0.0727	0.0024	2.1343	0.0688	0.2119	0.0026	-	0.3	1006	68	1160	22	1239	14	0.93	1006	68	Xiong et al. (2018)
D38-5-10	0.154	0.0026	10.0318	0.1694	0.4695	0.0042	-	0.87	2391	29	2438	16	2481	18	0.98	2391	29	Xiong et al. (2018)
D38-5-11	0.0764	0.0018	2.2251	0.0495	0.2109	0.0023	-	0.56	1106	46	1189	16	1234	12	0.96	1106	46	Xiong et al. (2018)
D38-5-12	0.1587	0.0022	9.8351	0.1457	0.4466	0.0037	-	0.42	2442	24	2419	14	2380	16	0.98	2442	24	Xiong et al. (2018)
D38-5-13	0.0699	0.0012	1.4872	0.0268	0.1533	0.0014	-	0.08	928	31	925	11	920	8	0.99	920	8	Xiong et al. (2018)
D38-5-15	0.0844	0.0025	2.0173	0.0604	0.1731	0.0014	-	0.68	1302	62	1121	20	1029	8	0.91	1302	62	Xiong et al. (2018)
D38-5-16	0.0933	0.0036	2.6188	0.1011	0.2035	0.0022	-	0.91	1495	73	1306	28	1194	12	0.91	1495	73	Xiong et al. (2018)
D38-5-17	0.0758	0.0039	1.5687	0.0773	0.1506	0.0021	-	0.76	1100	104	958	31	904	12	0.94	904	12	Xiong et al. (2018)
D38-5-23	0.1185	0.0038	5.3555	0.1708	0.3256	0.0043	-	0.64	1933	57	1878	27	1817	21	0.96	1933	57	Xiong et al. (2018)
D38-5-24	0.1118	0.0025	4.2183	0.0955	0.2716	0.0023	-	0.86	1829	40	1678	19	1549	12	0.92	1829	40	Xiong et al. (2018)
D38-5-25	0.1702	0.0032	11.1824	0.2102	0.4737	0.0043	-	1.21	2561	31	2538	18	2500	19	0.98	2561	31	Xiong et al. (2018)
D38-5-26	0.1245	0.0022	6.994	0.1196	0.4055	0.0035	-	0.56	2022	31	2111	15	2194	16	0.96	2022	31	Xiong et al. (2018)
D38-5-27	0.122	0.0021	5.6806	0.1049	0.3359	0.0031	-	0.64	1987	31	1928	16	1867	15	0.96	1987	31	Xiong et al. (2018)
D38-5-28	0.0906	0.0016	2.9224	0.049	0.2333	0.0019	-	0.81	1439	32	1388	13	1352	10	0.97	1439	32	Xiong et al. (2018)
D38-5-29	0.0853	0.0016	2.1147	0.0528	0.1777	0.0022	-	0.14	1324	36	1154	17	1054	12	0.91	1324	36	Xiong et al. (2018)
D38-5-30	0.1055	0.0021	4.0845	0.0853	0.2797	0.0025	-	0.28	1724	37	1651	17	1590	13	0.96	1724	37	Xiong et al. (2018)
D38-5-31	0.1353	0.0027	7.3344	0.1572	0.3917	0.0038	-	0.45	2168	35	2153	19	2131	17	0.98	2168	35	Xiong et al. (2018)
D38-5-32	0.1609	0.0031	10.6443	0.2196	0.478	0.0047	-	1.03	2465	33	2493	19	2518	20	0.98	2465	33	Xiong et al. (2018)
D38-5-33	0.1885	0.0035	13.7787	0.2598	0.5283	0.0044	-	0.36	2729	31	2735	18	2734	19	0.99	2729	31	Xiong et al. (2018)
D38-5-34	0.1029	0.0019	4.0703	0.0787	0.2858	0.0022	-	0.5	1677	40	1648	16	1620	11	0.98	1677	40	Xiong et al. (2018)
D38-5-35	0.0615	0.0012	0.8821	0.0174	0.1035	0.0009	-	0.62	657	41	642	9	635	5	0.98	635	5	Xiong et al. (2018)
D38-5-36	0.1702	0.0029	10.9647	0.2005	0.4652	0.0045	-	0.55	2559	28	2520	17	2463	20	0.97	2559	28	Xiong et al. (2018)
D38-5-37	0.0746	0.0016	1.8728	0.0423	0.1815	0.002	-	0.74	1057	44	1072	15	1075	11	0.99	1057	44	Xiong et al. (2018)
D38-5-38	0.1072	0.002	4.6262	0.0861	0.3116	0.0027	-	1.05	1754	34	1754	16	1749	13	0.99	1754	34	Xiong et al. (2018)
D38-5-40	0.1585	0.0027	9.5067	0.1564	0.4338	0.0033	-	2.02	2440	29	2388	15	2323	15	0.97	2440	29	Xiong et al. (2018)
D38-5-41	0.0671	0.0012	1.245	0.022	0.1341	0.001	-	0.4	843	37	821	10	811	6	0.98	811	6	Xiong et al. (2018)
D38-5-42	0.078	0.0013	2.0452	0.037	0.1894	0.002	-	0.18	1148	36	1131	12	1118	11	0.98	1148	36	Xiong et al. (2018)
D38-5-43	0.0918	0.0017	3.1819	0.0636	0.2503	0.0022	-	0.7	1465	35	1453	15	1440	11	0.99	1465	35	Xiong et al. (2018)
D38-5-44	0.1618	0.0027	10.577	0.1854	0.4721	0.0046	-	0.51	2476	28	2487	16	2493	20	0.99	2476	28	Xiong et al. (2018)
D38-5-45	0.1622	0.0024	10.399	0.1639	0.4625	0.0037	-	0.11	2480	25	2471	15	2450	16	0.99	2480	25	Xiong et al. (2018)
D38-5-48	0.0742	0.0014	1.8598	0.0372	0.1807	0.0019	-	0.09	1056	37	1067	13	1071	10	0.99	1056	37	Xiong et al. (2018)
D38-5-50	0.0694	0.0019	1.4487	0.0381	0.1508	0.0015	-	0.32	911	56	909	16	905	8	0.99	905	8	Xiong et al. (2018)
D38-5-51	0.0873	0.0021	2.8248	0.0695	0.2332	0.0025	-	0.39	1369	47	1362	18	1351	13	0.99	1369	47	Xiong et al. (2018)
D38-5-52	0.1583	0.003	9.4096	0.1771	0.4287	0.0046	-	0.94	2439	32	2379	17	2300	21	0.96	2439	32	Xiong et al. (2018)
D38-5-53	0.0966	0.0018	3.8396	0.0708	0.2862	0.0026	-	0.64	1559	35	1601	15	1623	13	0.98	1559	35	Xiong et al. (2018)
D38-5-54	0.0929	0.0019	3.3377	0.0661	0.2587	0.0025	-	0.57	1487	39	1490	16	1483	13	0.99	1487	39	Xiong et al. (2018)
D38-5-55	0.1108	0.0024	5.0492	0.1111	0.3271	0.0031	-	0.94	1813	39	1828	19	1824	15	0.99	1813	39	Xiong et al. (2018)
D38-5-56	0.1141	0.0025	4.9868	0.1062	0.3145	0.0028	-	1.14	1866	40	1817	18	1763	14	0.96	1866	40	Xiong et al. (2018)
D38-5-57	0.0695	0.0015	1.5171	0.0313	0.1572	0.0015	-	0.58	917	47	937	13	941	8	0.99	941	8	Xiong et al. (2018)
D38-5-58	0.0866	0.0015	2.9089	0.0524	0.2419	0.002	-	0.7	1354	35	1384	14	1397	10	0.99	1354	35	Xiong et al. (2018)
D38-5-59	0.2483	0.0044	21.4769	0.3953	0.6239	0.0058	-	0.62	3176	28	3160	18	3125	23	0.98	3176	28	Xiong et al. (2018)
D38-5-60	0.0662	0.0022	1.1686	0.0398	0.1272	0.0013	-	0.76	813	69	786	19	772	8	0.98	772	8	Xiong et al. (2018)
D38-5-61	0.0851	0.002	2.6923	0.064	0.2289	0.0022	-	0.81	1318	46	1326	18	1329	11	0.99	1318	46	Xiong et al. (2018)
D38-5-62	0.0735	0.0019	1.6907	0.0431	0.1664	0.0014	-	0.21	1028	50	1005	16	992	8	0.98	992	8	Xiong et al. (2018)
D38-5-63	0.0744	0.002	1.6277	0.0472	0.158	0.0015	-	0.96	1051	56	981	18	946	8	0.96	946	8	Xiong et al. (2018)
D38-5-64	0.0691	0.0013	1.4698	0.0275	0.1537	0.0014	-	0.44	902	38	918	11	922	8	0.99	922	8	Xiong et al. (2018)
D38-5-65	0.0968	0.0017	3.7425	0.0678	0.2795	0.0025	-	0.61	1563	33	1581	15	1589	13	0.99	1563	33	Xiong et al. (2018)
D38-5-67	0.1021	0.0021	3.8492	0.0825	0.272	0.0025	-	0.72	1665	39	1603	17	1551	13	0.96	1665	39	Xiong et al. (2018)
D38-5-68	0.0695	0.0017	1.5323	0.0376	0.1593	0.0015	-	0.47	922	50	943	15	953	9	0.98	953	9	Xiong et al. (2018)
D38-5-69	0.0971	0.002	3.5273	0.0737	0.2627	0.0024	-	2.39	1569	40	1533	17	1504	12	0.98	1569	40	Xiong et al. (2018)
D38-5-70	0.0939	0.0017	3.0415	0.0531	0.2343	0.0016	-	0.56	1506	34	1418	13	1357	8	0.95	1506	34	Xiong et al. (2018)
D38-5-71	0.0666	0.0016	1.5393	0.0391	0.1669	0.0016	-	0.53	828	50	946	16	995	9	0.95	995	9	Xiong et al. (2018)
D38-5-72	0.0701	0.0018	1.5314	0.0399	0.1582	0.0015	-	1.43	932	54	943	16	947	9	0.99	947	9	Xiong et al. (2018)
D38-5-73	0.0921	0.002	3.2527	0.0733	0.2553	0.0022	-	1.59	1472	47	1470	18	1466	11	0.99	1472	47	Xiong et al. (2018)
D38-5-74	0.0924	0.0021	3.2051	0.0734	0.251	0.0023	-	0.58	1476	44	1458	18	1444	12	0.98	1476	44	Xiong et al. (2018)
D38-5-75	0.0739	0.0022	2.0129	0.0616	0.1969	0.0018	-	1.38	1039	61	1120	21	1159	9	0.96	1039	61	Xiong et al. (2018)
D38-5-76	0.1664	0.0028	10.4232	0.1789	0.4529	0.0037	-	0.84	2522	28	2473	16	2408	17	0.97	2522	28	Xiong et al. (2018)
D38-5-77	0.0718	0.0014	1.5874	0.0323	0.1601	0.0016	-	0.93	989	41	965	13	957	9	0.99	957	9	Xiong et al. (2018)
D38-5-78	0.0743	0.0014	1.9458	0.0379	0.1892	0.0017	-	0.38	1050	37	1097	13	1117	9	0.98	1050	37	Xiong et al. (2018)
D38-5-79	0.0652	0.0016	1.1386	0.0285	0.1259	0.0014	-	0.7	783	54	772	14	765	8	0.99	765	8	Xiong et al. (2018)
D38-5-80	0.0707	0.0015	1.5966	0.032	0.1631	0.0013	-	1.1	950	43	969	13	974	7	0.99	974	7	Xiong et al. (2018)
D38-5-81	0.087	0.0018	2.8824	0.0644	0.2387	0.0026	-	0.66	1361	45	1377	17	1380	14	0.99	1361	45	Xiong et al. (2018)
D38-5-82	0.0755	0.0015	1.7038	0.0352	0.1625	0.0016	-	0.79	1083	40	1010	13	971	9	0.96	971	9	Xiong et al. (2018)
D38-5-83	0.0703	0.002	1.5202	0.0408	0.1562	0.0016	-	1.91	939	57	939	16	936	9	0.99	936	9	Xiong et al. (2018)
D38-5-84	0.0708	0.0016	1.5531	0.0388	0.1577	0.0019	-	0.18	951	46	952	15	944	11	0.99	944	11	Xiong et al. (2018)
D38-5-85	0.0757	0.0018	1.8485	0.0438	0.1763	0.0017	-	0.52	1087	47	1063	16	1047	9	0.98	1087	47	Xiong et al. (2018)
D38-5-86	0.071	0.0014	1.5134	0.0286	0.1543	0.0012	-	0.48	967	41	936	12	925	7	0.98	925	7	Xiong et al. (2018)
D38-5-87	0.0711	0.0013	1.6326	0.0317	0.166	0.0014	-	0.33	961	38	983	12	990	8	0.99	990	8	Xiong et al. (2018)
D38-5-88	0.1083	0.0025	4.5275	0.1064	0.3026	0.0029	-	0.6	1772	42	1736	20	1704	14	0.98	1772	42	Xiong et al. (2018)
D38-5-89	0.0725	0.0016	1.5382	0.0349	0.1537	0.0014	-	0.23	1011	44	946	14	922	8	0.97	922	8	Xiong et al. (2018)
D38-5-91	0.1655	0.003	9.5423	0.186	0.4182	0.0033	-	0.72	2512	31	2392	18	2252	15	0.93	2512	31	Xiong et al. (2018)
D38-5-92	0.1669	0.0027	10.5216	0.1842	0.4568	0.0035	-	0.81	2527	27	2482	16	2425	16	0.97	2527	27	Xiong et al. (2018)
D38-5-93	0.0783	0.0015	1.9926	0.0399	0.1845	0.0016	-	0.43	1154	37	1113	14	1091	9	0.98	1154	37	Xiong et al. (2018)
D38-5-94	0.0725	0.0014	1.7034	0.0355	0.1703	0.0019	-	0.26	1000	39	1010	13	1014	10	0.99	1000	39	Xiong et al. (2018)
D38-5-95	0.1096	0.0021	4.8434	0.0997	0.3199	0.003	-	0.45	1792	31	1792	17	1789	15	0.99	1792	31	Xiong et al. (2018)
																		Xiong et al. (2018)
D50-2: Late Ediacaran (N25°39′03.20″, E114°11′34.83″)							-											Xiong et al. (2018)
D50-2-01	0.0951	0.0018	3.0007	0.0602	0.228	0.0019	-	0.16	1531	37	1408	15	1324	10	0.93	1531	37	Xiong et al. (2018)
D50-2-02	0.0743	0.0031	1.6164	0.0648	0.1583	0.002	-	1.06	1050	83	977	25	947	11	0.96	947	11	Xiong et al. (2018)
D50-2-03	0.0619	0.0017	0.872	0.0243	0.102	0.001	-	0.43	672	59	637	13	626	6	0.98	626	6	Xiong et al. (2018)
D50-2-04	0.0736	0.0031	1.61	0.0651	0.1599	0.0023	-	0.76	1031	90	974	25	956	13	0.98	956	13	Xiong et al. (2018)
D50-2-05	0.0606	0.0014	0.8739	0.0197	0.1045	0.001	-	0.48	628	50	638	11	641	6	0.99	641	6	Xiong et al. (2018)
D50-2-06	0.0803	0.0018	2.1059	0.0511	0.1893	0.0023	-	0.66	1206	43	1151	17	1118	12	0.97	1206	43	Xiong et al. (2018)
D50-2-07	0.0808	0.002	1.7967	0.0428	0.1607	0.0014	-	0.12	1217	48	1044	16	961	8	0.91	961	8	Xiong et al. (2018)
D50-2-08	0.0597	0.0016	0.8621	0.0225	0.1044	0.0009	-	0.47	594	25	631	12	640	5	0.98	640	5	Xiong et al. (2018)
D50-2-09	0.0716	0.0017	1.5251	0.0351	0.1542	0.0013	-	0.33	976	49	941	14	925	8	0.98	925	8	Xiong et al. (2018)
D50-2-10	0.0698	0.0015	1.4919	0.0321	0.1546	0.0014	-	0.32	921	44	927	13	927	8	0.99	927	8	Xiong et al. (2018)
D50-2-12	0.0709	0.002	1.2898	0.0353	0.1315	0.0013	-	0.2	955	57	841	16	796	8	0.94	796	8	Xiong et al. (2018)
D50-2-13	0.072	0.0015	1.5061	0.0322	0.151	0.0015	-	0.37	987	43	933	13	907	8	0.97	907	8	Xiong et al. (2018)
D50-2-14	0.0834	0.0035	2.2823	0.1071	0.1964	0.0035	-	0.5	1280	81	1207	33	1156	19	0.95	1280	81	Xiong et al. (2018)
D50-2-15	0.069	0.0018	1.4071	0.0376	0.1474	0.0016	-	0.6	898	56	892	16	886	9	0.99	886	9	Xiong et al. (2018)
D50-2-17	0.0915	0.0028	3.294	0.0984	0.2602	0.0028	-	1.19	1457	58	1480	23	1491	15	0.99	1457	58	Xiong et al. (2018)
D50-2-18	0.0942	0.0026	3.2142	0.0857	0.2463	0.0022	-	0.9	1522	52	1461	21	1419	12	0.97	1522	52	Xiong et al. (2018)
D50-2-19	0.0747	0.0024	1.6642	0.0495	0.1611	0.0016	-	0.58	1061	63	995	19	963	9	0.96	963	9	Xiong et al. (2018)
D50-2-20	0.0773	0.0019	1.9212	0.0473	0.1792	0.0017	-	0.42	1129	55	1088	16	1063	9	0.97	1129	55	Xiong et al. (2018)
D50-2-21	0.1161	0.0023	4.6379	0.0877	0.2876	0.002	-	0.82	1898	35	1756	16	1630	10	0.92	1898	35	Xiong et al. (2018)
D50-2-22	0.0741	0.0017	1.8338	0.0404	0.1784	0.0018	-	0.61	1056	50	1058	14	1058	10	0.99	1056	50	Xiong et al. (2018)
D50-2-23	0.0685	0.0016	1.4588	0.0323	0.1539	0.0015	-	0.31	883	49	913	13	923	9	0.98	923	9	Xiong et al. (2018)
D50-2-24	0.0694	0.0016	1.5857	0.0376	0.1642	0.0014	-	0.59	910	53	965	15	980	8	0.98	980	8	Xiong et al. (2018)
D50-2-25	0.0754	0.0017	2.0042	0.0457	0.1911	0.0018	-	0.6	1080	46	1117	15	1127	10	0.99	1080	46	Xiong et al. (2018)
D50-2-26	0.0664	0.0018	1.2833	0.0346	0.1391	0.0016	-	0.24	818	56	838	15	839	9	0.99	839	9	Xiong et al. (2018)
D50-2-27	0.0918	0.0019	3.2297	0.0693	0.2534	0.0025	-	0.59	1463	34	1464	17	1456	13	0.99	1463	34	Xiong et al. (2018)
D50-2-28	0.073	0.0019	1.4966	0.0376	0.148	0.0013	-	0.3	1013	52	929	15	890	7	0.95	890	7	Xiong et al. (2018)
D50-2-29	0.0752	0.0014	1.695	0.0313	0.1628	0.0012	-	0.06	1073	38	1007	12	972	6	0.96	972	6	Xiong et al. (2018)
D50-2-30	0.0712	0.0026	1.5898	0.0524	0.1618	0.0022	-	0.28	963	76	966	21	967	12	0.99	967	12	Xiong et al. (2018)
D50-2-31	0.0733	0.0016	1.6361	0.0396	0.1611	0.0016	-	0.79	1033	79	984	15	963	9	0.97	963	9	Xiong et al. (2018)
D50-2-32	0.0776	0.0018	1.6766	0.0402	0.1562	0.0013	-	0.59	1137	47	1000	15	936	7	0.93	936	7	Xiong et al. (2018)
D50-2-33	0.0832	0.0021	2.1492	0.0539	0.1869	0.0017	-	0.57	1276	45	1165	17	1105	9	0.94	1276	45	Xiong et al. (2018)
D50-2-34	0.0741	0.0018	1.6558	0.0441	0.1608	0.0016	-	0.41	1056	50	992	17	961	9	0.96	961	9	Xiong et al. (2018)
D50-2-35	0.0743	0.0016	1.6302	0.0348	0.1586	0.0015	-	0.24	1050	44	982	13	949	9	0.96	949	9	Xiong et al. (2018)
D50-2-36	0.0702	0.0019	1.5695	0.0419	0.1613	0.0016	-	0.27	933	57	958	17	964	9	0.99	964	9	Xiong et al. (2018)
D50-2-38	0.0777	0.0023	1.8796	0.0601	0.1736	0.0019	-	1.11	1140	59	1074	21	1032	11	0.95	1140	59	Xiong et al. (2018)
D50-2-39	0.0735	0.002	1.3155	0.0367	0.129	0.0012	-	0.25	1028	57	853	16	782	7	0.91	782	7	Xiong et al. (2018)
D50-2-40	0.0705	0.0016	1.4801	0.0328	0.1513	0.0012	-	0.25	943	44	922	13	908	7	0.98	908	7	Xiong et al. (2018)
D50-2-41	0.0739	0.0016	1.678	0.0391	0.1637	0.0013	-	0.82	1039	44	1000	15	977	7	0.97	977	7	Xiong et al. (2018)
D50-2-43	0.076	0.0018	1.9441	0.0497	0.1847	0.0018	-	0.46	1096	44	1096	17	1092	10	0.99	1096	44	Xiong et al. (2018)
D50-2-46	0.0621	0.0013	0.8156	0.019	0.0948	0.0008	-	0.38	676	44	606	11	584	5	0.96	584	5	Xiong et al. (2018)
D50-2-47	0.0881	0.002	2.3387	0.0548	0.1919	0.0015	-	1.17	1385	44	1224	17	1132	8	0.92	1385	44	Xiong et al. (2018)
D50-2-49	0.0689	0.0022	1.1873	0.0363	0.1248	0.0012	-	0.23	894	66	795	17	758	7	0.95	758	7	Xiong et al. (2018)
D50-2-51	0.0742	0.0018	1.6427	0.0397	0.1605	0.0017	-	0.63	1056	49	987	15	960	9	0.97	960	9	Xiong et al. (2018)
D50-2-53	0.0715	0.002	1.5027	0.0385	0.1524	0.0015	-	0.68	972	53	931	16	915	9	0.98	915	9	Xiong et al. (2018)
D50-2-55	0.0746	0.0014	1.6748	0.0333	0.1622	0.0013	-	0.57	1057	38	999	13	969	7	0.96	969	7	Xiong et al. (2018)
D50-2-56	0.1141	0.0018	4.8878	0.0979	0.3091	0.0038	-	0.67	1865	29	1800	17	1736	19	0.96	1865	29	Xiong et al. (2018)
D50-2-58	0.0853	0.0018	2.5139	0.0545	0.2136	0.0026	-	0.65	1322	41	1276	16	1248	14	0.97	1322	41	Xiong et al. (2018)
D50-2-59	0.0721	0.0016	1.2989	0.0281	0.1303	0.0011	-	0.22	987	45	845	12	789	6	0.93	789	6	Xiong et al. (2018)
D50-2-60	0.0754	0.0016	1.8843	0.0418	0.1807	0.0017	-	0.57	1080	43	1076	15	1071	9	0.99	1080	43	Xiong et al. (2018)
D50-2-61	0.0742	0.0016	1.5986	0.0344	0.1558	0.0014	-	0.81	1056	48	970	13	933	8	0.96	933	8	Xiong et al. (2018)
D50-2-62	0.0741	0.0014	1.7237	0.0362	0.1679	0.0017	-	0.21	1044	39	1017	14	1001	9	0.98	1044	39	Xiong et al. (2018)
D50-2-63	0.077	0.0014	1.9814	0.0382	0.1855	0.0015	-	0.65	1124	40	1109	13	1097	8	0.98	1124	40	Xiong et al. (2018)
D50-2-64	0.2137	0.0034	15.7743	0.247	0.5326	0.004	-	1.08	2934	26	2863	15	2752	17	0.96	2934	26	Xiong et al. (2018)
D50-2-65	0.0652	0.0027	1.1251	0.0433	0.1253	0.0016	-	0.9	789	81	765	21	761	9	0.99	761	9	Xiong et al. (2018)
D50-2-66	0.0732	0.0017	1.5768	0.0358	0.1555	0.0015	-	0.49	1020	46	961	14	932	8	0.96	932	8	Xiong et al. (2018)
D50-2-67	0.0711	0.0018	1.2936	0.032	0.1313	0.0013	-	0.09	961	50	843	14	796	7	0.94	796	7	Xiong et al. (2018)
D50-2-68	0.0725	0.0016	1.3832	0.0306	0.1376	0.0013	-	0.71	1011	39	882	13	831	7	0.94	831	7	Xiong et al. (2018)
D50-2-69	0.1738	0.003	11.5422	0.2068	0.4792	0.0044	-	0.35	2595	29	2568	17	2524	19	0.98	2595	29	Xiong et al. (2018)
D50-2-71	0.1911	0.0031	14.214	0.235	0.5378	0.0047	-	0.79	2752	26	2764	16	2774	20	0.99	2752	26	Xiong et al. (2018)
D50-2-72	0.071	0.0017	1.5433	0.0393	0.1569	0.0016	-	0.46	958	49	948	16	939	9	0.99	939	9	Xiong et al. (2018)
D50-2-73	0.0762	0.0017	1.6769	0.0406	0.159	0.0016	-	0.47	1100	46	1000	15	951	9	0.95	951	9	Xiong et al. (2018)
D50-2-74	0.0748	0.0015	1.6561	0.0326	0.1601	0.0013	-	0.93	1065	35	992	12	957	8	0.96	957	8	Xiong et al. (2018)
D50-2-75	0.0776	0.0016	1.7073	0.0399	0.1584	0.0018	-	0.3	1139	40	1011	15	948	10	0.93	948	10	Xiong et al. (2018)
D50-2-76	0.0662	0.0013	1.1339	0.0225	0.124	0.0013	-	0.35	813	42	770	11	754	7	0.97	754	7	Xiong et al. (2018)
D50-2-77	0.0732	0.0018	1.4083	0.0356	0.139	0.0013	-	0.1	1020	52	892	15	839	7	0.93	839	7	Xiong et al. (2018)
D50-2-78	0.0603	0.0016	0.979	0.0273	0.1174	0.0013	-	0.61	617	59	693	14	715	8	0.96	715	8	Xiong et al. (2018)
D50-2-79	0.0748	0.0018	1.7766	0.0443	0.1714	0.0017	-	0.62	1063	48	1037	16	1020	10	0.98	1063	48	Xiong et al. (2018)
D50-2-80	0.0768	0.0014	1.6649	0.0312	0.1565	0.0012	-	0.26	1117	36	995	12	937	7	0.93	937	7	Xiong et al. (2018)
D50-2-83	0.0662	0.002	1.4118	0.0385	0.1547	0.0018	-	0.34	813	61	894	16	927	10	0.96	927	10	Xiong et al. (2018)
D50-2-84	0.0853	0.0017	2.4839	0.0526	0.21	0.002	-	0.68	1324	38	1267	15	1229	11	0.96	1324	38	Xiong et al. (2018)
D50-2-85	0.0611	0.0014	0.8292	0.0187	0.0982	0.001	-	0.64	643	53	613	10	604	6	0.98	604	6	Xiong et al. (2018)
D50-2-86	0.1247	0.0023	6.202	0.1262	0.3591	0.0045	-	0.42	2025	33	2005	18	1978	21	0.98	2025	33	Xiong et al. (2018)
D50-2-87	0.0637	0.0011	1.0084	0.0187	0.1142	0.001	-	0.3	731	37	708	9	697	6	0.98	697	6	Xiong et al. (2018)
D50-2-88	0.0624	0.0016	0.8661	0.0214	0.1005	0.0011	-	0.47	687	54	633	12	617	6	0.97	617	6	Xiong et al. (2018)
D50-2-90	0.1372	0.0027	7.5185	0.1608	0.3951	0.0046	-	0.37	2192	34	2175	19	2146	21	0.98	2192	34	Xiong et al. (2018)
D50-2-91	0.0743	0.0022	1.579	0.0464	0.154	0.0019	-	0.88	1050	61	962	18	923	10	0.95	923	10	Xiong et al. (2018)
D50-2-92	0.0759	0.0015	1.9071	0.0372	0.1812	0.0016	-	0.55	1092	39	1084	13	1073	9	0.99	1092	39	Xiong et al. (2018)
D50-2-93	0.0738	0.0017	1.8008	0.043	0.176	0.0017	-	0.92	1035	48	1046	16	1045	9	0.99	1035	48	Xiong et al. (2018)
D50-2-94	0.1844	0.0034	12.1591	0.2343	0.4752	0.0049	-	0.58	2694	31	2617	18	2506	21	0.95	2694	31	Xiong et al. (2018)
D50-2-96	0.0665	0.003	1.4388	0.0646	0.1578	0.0025	-	0.72	833	97	905	27	945	14	0.95	945	14	Xiong et al. (2018)
D50-2-97	0.0695	0.0019	1.4967	0.0389	0.1553	0.0016	-	0.9	922	56	929	16	931	9	0.99	931	9	Xiong et al. (2018)
D50-2-98	0.0688	0.0017	1.477	0.0379	0.1546	0.0014	-	0.41	894	54	921	16	927	8	0.99	927	8	Xiong et al. (2018)
D50-2-99	0.065	0.003	1.0804	0.0515	0.1198	0.0017	-	0.44	776	101	744	25	730	10	0.98	730	10	Xiong et al. (2018)
							-
JX-12: Late Cambrian (N25°26.244′, E114°13.807′)							-
JX-12-1	0.08341	0.00274	2.69937	0.08352	0.23462	0.00708	-	0.21	1278.8	62.7	1328.3	22.7	1358.7	36.9	102.289	1278.8	62.7	Wang et al. (2010)
JX-12-2	0.06537	0.00228	0.92538	0.03034	0.10262	0.0031	-	0.16	786.3	71.6	665.2	15.9	629.7	18.1	94.6633	629.7	18.1	Wang et al. (2010)
JX-12-3	0.08582	0.00332	2.50861	0.09222	0.21191	0.00654	-	0.06	1334.1	73	1274.5	26.3	1239	34.7	97.2146	1334.1	73	Wang et al. (2010)
JX-12-4	0.09805	0.0031	3.69622	0.10966	0.27328	0.00822	-	0.44	1587.4	58	1570.6	23.4	1557.4	41.5	99.1596	1587.4	58	Wang et al. (2010)
JX-12-5	0.17382	0.00536	10.383	0.29928	0.43302	0.01298	-	0.41	2594.8	50.5	2469.5	26.4	2319.3	58.1	93.9178	2594.8	50.5	Wang et al. (2010)
JX-12-6	0.06498	0.00214	0.90971	0.02832	0.1015	0.00306	-	0.83	773.7	67.8	656.9	14.9	623.2	17.9	94.8698	623.2	17.9	Wang et al. (2010)
JX-12-8	0.09261	0.00286	3.0005	0.0868	0.23489	0.00704	-	0.22	1479.9	57.4	1407.7	21.8	1360.1	36.6	96.6186	1479.9	57.4	Wang et al. (2010)
JX-12-9	0.06885	0.00212	0.96683	0.028	0.1018	0.00304	-	0.23	894.2	62.3	686.8	14.4	624.9	17.8	90.9872	624.9	17.8	Wang et al. (2010)
JX-12-10	0.07973	0.00248	2.12088	0.06156	0.19284	0.00578	-	0.1	1190.3	60.2	1155.6	19.8	1136.7	31.2	98.3645	1190.3	60.2	Wang et al. (2010)
JX-12-11	0.07442	0.00342	1.63209	0.07162	0.15899	0.005	-	0.99	1052.9	89.9	982.7	27.3	951.2	27.8	96.7945	951.2	27.8	Wang et al. (2010)
JX-12-12	0.07524	0.0025	1.62094	0.05058	0.15619	0.00472	-	0.26	1074.9	65.3	978.4	19.4	935.6	26.3	95.6255	935.6	26.3	Wang et al. (2010)
JX-12-13	0.08594	0.00266	2.62177	0.07578	0.22117	0.00662	-	0.06	1336.8	58.7	1306.8	21	1288.1	34.9	98.569	1336.8	58.7	Wang et al. (2010)
JX-12-14	0.08036	0.0027	1.72834	0.05482	0.15592	0.00472	-	0.4	1205.8	64.8	1019.1	20.2	934.1	26.3	91.6593	934.1	26.3	Wang et al. (2010)
JX-12-15	0.1727	0.00566	9.71372	0.29912	0.40775	0.0124	-	1.35	2584	53.7	2408	28	2204.6	56.5	91.5532	2584	53.7	Wang et al. (2010)
JX-12-16	0.0809	0.00266	1.78592	0.05522	0.16004	0.00482	-	0.16	1219	63.3	1040.3	19.9	957	26.7	91.9927	957	26.7	Wang et al. (2010)
JX-12-17	0.06835	0.00214	0.80893	0.02376	0.0858	0.00258	-	0.08	879.2	63.5	601.9	13.3	530.6	15.3	88.1542	530.6	15.3	Wang et al. (2010)
JX-12-18	0.09187	0.0033	3.00925	0.10212	0.23746	0.00726	-	0.95	1464.7	66.7	1410	25.5	1373.5	37.7	97.4113	1464.7	66.7	Wang et al. (2010)
JX-12-19	0.17257	0.00536	7.85822	0.22806	0.33011	0.0099	-	0.1	2582.7	50.9	2214.9	25.8	1838.9	47.8	83.0241	2582.7	50.9	Wang et al. (2010)
JX-12-20	0.06632	0.0022	0.70969	0.02226	0.07758	0.00234	-	0.12	816.5	67.8	544.6	13.1	481.7	14	88.4502	481.7	14	Wang et al. (2010)
JX-12-21	0.07558	0.00246	1.69166	0.05178	0.16227	0.00488	-	0.61	1084	63.9	1005.4	19.3	969.4	27	96.4193	969.4	27	Wang et al. (2010)
JX-12-22	0.06705	0.00216	0.72573	0.02194	0.07846	0.00236	-	0.36	839.3	65.7	554	12.8	486.9	14.1	87.8881	486.9	14.1	Wang et al. (2010)
JX-12-23	0.06098	0.00196	0.64008	0.0194	0.0761	0.00228	-	0.1	638.5	67.7	502.4	11.9	472.8	13.6	94.1083	472.8	13.6	Wang et al. (2010)
JX-12-24	0.05813	0.0019	0.68015	0.02092	0.08482	0.00256	-	0.91	534.7	70	526.9	12.6	524.8	15.2	99.6014	524.8	15.2	Wang et al. (2010)
JX-12-25	0.08552	0.00314	2.82347	0.0981	0.23934	0.00734	-	0.18	1327.4	69.5	1361.8	25.7	1383.3	38.1	101.579	1327.4	69.5	Wang et al. (2010)
JX-12-26	0.07323	0.00234	1.13471	0.03396	0.11234	0.00338	-	0.1	1020.3	63.4	770	16	686.3	19.6	89.1299	686.3	19.6	Wang et al. (2010)
JX-12-27	0.13709	0.00422	7.7854	0.22376	0.41171	0.01232	-	0.2	2190.8	52.6	2206.5	25.5	2222.7	56	100.734	2190.8	52.6	Wang et al. (2010)
JX-12-28	0.16753	0.00518	6.43423	0.18628	0.27844	0.00834	-	0.48	2533.1	51	2037	25.1	1583.5	41.9	77.7369	2533.1	51	Wang et al. (2010)
JX-12-30	0.07579	0.0024	1.16184	0.03464	0.11114	0.00334	-	0.16	1089.5	62.2	782.8	16.1	679.4	19.3	86.791	679.4	19.3	Wang et al. (2010)
JX-12-31	0.27305	0.00836	25.6948	0.73662	0.68221	0.02042	-	0.41	3323.6	47.1	3335	27.6	3352.8	77.8	100.534	3323.6	47.1	Wang et al. (2010)
JX-12-32	0.07441	0.0041	2.37053	0.12552	0.23094	0.0076	-	0.4	1052.6	107.2	1233.8	37.1	1339.4	39.7	108.559	1052.6	107.2	Wang et al. (2010)
JX-12-33	0.07157	0.00222	1.31477	0.03834	0.13318	0.004	-	0.15	973.7	62	852.2	16.7	806	22.7	94.5787	806	22.7	Wang et al. (2010)
JX-12-34	0.07987	0.00252	1.70715	0.05038	0.15496	0.00466	-	0.04	1193.8	61	1011.2	18.7	928.7	26	91.8414	928.7	26	Wang et al. (2010)
JX-12-35	0.07915	0.00378	1.68346	0.0766	0.1542	0.0049	-	0.36	1175.9	91.7	1002.3	28.6	924.5	27.3	92.2379	924.5	27.3	Wang et al. (2010)
JX-12-36	0.11088	0.00344	2.65009	0.07682	0.17327	0.0052	-	0.17	1813.9	55.3	1314.7	21.1	1030.1	28.5	78.3525	1813.9	55.3	Wang et al. (2010)
JX-12-37	0.12991	0.00414	3.85841	0.1152	0.21532	0.00648	-	0.24	2096.7	54.9	1605	23.8	1257.1	34.3	78.324	2096.7	54.9	Wang et al. (2010)
JX-12-38	0.16917	0.00548	11.0402	0.33506	0.47312	0.01436	-	0.56	2549.4	53.3	2526.5	27.9	2497.2	62.5	98.8403	2549.4	53.3	Wang et al. (2010)
JX-12-39	0.07931	0.0026	0.86457	0.02668	0.07903	0.00238	-	0.1	1179.9	63.5	632.6	14.4	490.3	14.2	77.5055	490.3	14.2	Wang et al. (2010)
JX-12-40	0.07233	0.00228	1.06353	0.03148	0.1066	0.0032	-	0.11	995.2	62.8	735.6	15.4	653	18.6	88.7711	653	18.6	Wang et al. (2010)
JX-12-41	0.17304	0.00532	9.51968	0.27432	0.39884	0.01196	-	0.34	2587.3	50.4	2389.4	26.1	2163.7	54.9	90.5541	2587.3	50.4	Wang et al. (2010)
JX-12-42	0.08146	0.00266	1.73267	0.05308	0.1542	0.00464	-	0.43	1232.6	62.8	1020.7	19.5	924.5	25.9	90.5751	924.5	25.9	Wang et al. (2010)
JX-12-43	0.17314	0.00574	7.21354	0.22386	0.30204	0.0092	-	0.35	2588.2	54.3	2138.2	27.3	1701.4	45.4	79.5716	2588.2	54.3	Wang et al. (2010)
JX-12-44	0.08075	0.00268	1.71278	0.05344	0.15376	0.00464	-	0.79	1215.4	63.9	1013.3	19.8	922	25.9	90.9898	922	25.9	Wang et al. (2010)
JX-12-45	0.17232	0.0053	8.84167	0.25398	0.37197	0.01114	-	0.09	2580.3	50.5	2321.8	25.9	2038.7	52.1	87.8069	2580.3	50.5	Wang et al. (2010)
JX-12-46	0.07911	0.00254	1.68597	0.05064	0.1545	0.00464	-	0.47	1174.9	62.2	1003.2	19	926.1	25.9	92.3146	926.1	25.9	Wang et al. (2010)
JX-12-47	0.07118	0.00254	1.37311	0.04634	0.13986	0.00424	-	0.39	962.6	71.2	877.5	19.6	843.9	23.9	96.1709	843.9	23.9	Wang et al. (2010)
JX-12-48	0.08192	0.00262	2.43081	0.07276	0.21512	0.00646	-	0.62	1243.6	61.4	1251.8	21.3	1256	34.2	100.336	1243.6	61.4	Wang et al. (2010)
JX-12-49	0.0659	0.00212	0.95383	0.02874	0.10494	0.00316	-	0.66	803.2	66	680.1	14.8	643.3	18.4	94.589	643.3	18.4	Wang et al. (2010)
JX-12-50	0.07304	0.0024	1.5699	0.0484	0.15583	0.0047	-	0.37	1015.1	65.2	958.4	18.9	933.6	26.2	97.4124	933.6	26.2	Wang et al. (2010)
JX-12-51	0.08221	0.0029	1.17173	0.0391	0.10333	0.00314	-	0.19	1250.5	67.5	787.5	18.1	633.9	18.3	80.4952	633.9	18.3	Wang et al. (2010)
JX-12-52	0.19856	0.00744	17.4008	0.61716	0.63534	0.02038	-	0.38	2814.4	59.9	2957.2	33.5	3170.7	79.8	107.22	2814.4	59.9	Wang et al. (2010)
JX-12-53	0.07285	0.0023	1.35781	0.04002	0.13511	0.00406	-	0.15	1009.8	62.7	870.9	17.1	817	23	93.811	817	23	Wang et al. (2010)
JX-12-54	0.07485	0.00236	1.11949	0.03296	0.10843	0.00326	-	0.11	1064.5	62.1	762.7	15.7	663.6	18.9	87.0067	663.6	18.9	Wang et al. (2010)
JX-12-55	0.13308	0.00418	4.00103	0.11752	0.21796	0.00654	-	0.36	2139	53.9	1634.4	23.6	1271.1	34.5	77.7717	2139	53.9	Wang et al. (2010)
JX-12-56	0.10198	0.00328	4.09035	0.12346	0.29078	0.00876	-	0.34	1660.5	58.4	1652.4	24.3	1645.4	43.6	99.5764	1660.5	58.4	Wang et al. (2010)
JX-12-57	0.17412	0.00568	8.7483	0.268	0.36423	0.01106	-	0.86	2597.6	53.4	2312.1	27.5	2002.2	52.1	86.5966	2597.6	53.4	Wang et al. (2010)
JX-12-58	0.08794	0.00368	1.93974	0.07714	0.15991	0.005	-	0.28	1381.2	78.3	1094.9	26.3	956.3	27.7	87.3413	956.3	27.7	Wang et al. (2010)
JX-12-59	0.0703	0.003	0.82798	0.03356	0.08539	0.00264	-	0.41	937.1	85.1	612.5	18.5	528.2	15.7	86.2367	528.2	15.7	Wang et al. (2010)
JX-12-60	0.07807	0.00256	1.73589	0.05362	0.1612	0.00486	-	0.24	1148.7	63.8	1021.9	19.7	963.4	26.9	94.2754	963.4	26.9	Wang et al. (2010)
JX-12-61	0.08156	0.00306	1.51162	0.05362	0.13436	0.00412	-	0.45	1235	71.9	935.1	21.4	812.7	23.4	86.9105	812.7	23.4	Wang et al. (2010)
JX-16: Early Cambrian (N25°21.716′, E114°27.154′)
JX-16-2	0.09453	0.0032	3.06628	0.10088	0.23527	0.00746	-	0.51	1518.7	62.5	1424.3	24.9	1362.1	38.8	95.6329	1518.7	62.5	Wang et al. (2010)
JX-16-3	0.06829	0.0022	1.39752	0.04356	0.14843	0.00466	-	0.3	877.4	65.3	887.9	18.3	892.2	26.1	100.484	892.2	26.1	Wang et al. (2010)
JX-16-4	0.15419	0.00456	9.00179	0.25768	0.4234	0.0132	-	0.88	2392.9	49.5	2338.2	25.8	2275.9	59.5	97.3356	2392.9	49.5	Wang et al. (2010)
JX-16-5	0.06473	0.00236	0.99127	0.03496	0.11107	0.00352	-	0.08	765.6	75	699.4	17.7	679	20.4	97.0832	679	20.4	Wang et al. (2010)
JX-16-6	0.0788	0.0029	2.06404	0.0734	0.18996	0.00604	-	0.75	1167.1	71.2	1137	24	1121.2	32.6	98.6104	1167.1	71.2	Wang et al. (2010)
JX-16-7	0.08231	0.00278	2.32536	0.07606	0.20489	0.00646	-	0.5	1252.9	64.7	1220.1	23	1201.5	34.5	98.4755	1252.9	64.7	Wang et al. (2010)
JX-16-10	0.06825	0.00226	1.03485	0.03308	0.10996	0.00344	-	0.17	876.2	67.1	721.4	16.4	672.5	19.9	93.2215	672.5	19.9	Wang et al. (2010)
JX-16-12	0.1045	0.00338	4.23325	0.1318	0.29376	0.0092	-	0.41	1705.5	58.4	1680.5	25.3	1660.3	45.7	98.798	1705.5	58.4	Wang et al. (2010)
JX-16-14	0.1021	0.00312	4.07529	0.12008	0.28945	0.00898	-	0.4	1662.6	55.5	1649.4	23.7	1638.8	44.7	99.3573	1662.6	55.5	Wang et al. (2010)
JX-16-15	0.06845	0.00218	1.33888	0.04106	0.14183	0.0044	-	0.07	882.2	64.5	862.7	17.7	855	24.8	99.1075	855	24.8	Wang et al. (2010)
JX-16-16	0.07054	0.00224	1.44863	0.0444	0.14892	0.00462	-	0.6	944.1	63.7	909.3	18.2	894.9	25.9	98.4164	894.9	25.9	Wang et al. (2010)
JX-16-18	0.07762	0.00338	1.74317	0.07336	0.16285	0.00526	-	1.15	1137.2	84.3	1024.6	26.8	972.6	29.1	94.9248	972.6	29.1	Wang et al. (2010)
JX-16-19	0.06651	0.00354	1.41468	0.07284	0.15424	0.00512	-	0.48	822.5	107.4	895.1	30.2	924.7	28.5	103.307	924.7	28.5	Wang et al. (2010)
JX-16-20	0.12621	0.0038	6.33301	0.1831	0.36386	0.01124	-	2.15	2045.8	52.3	2023	25	2000.4	52.9	98.8828	2045.8	52.3	Wang et al. (2010)
JX-16-21	0.06804	0.00222	1.03515	0.03264	0.11033	0.00342	-	0.31	869.8	66.2	721.5	16.2	674.7	19.8	93.5135	674.7	19.8	Wang et al. (2010)
JX-16-24	0.08377	0.0027	2.32255	0.07158	0.20104	0.00622	-	0.5	1287.2	61.5	1219.2	21.6	1180.9	33.3	96.8586	1287.2	61.5	Wang et al. (2010)
JX-16-25	0.08373	0.00286	2.17942	0.07124	0.18873	0.00586	-	2.87	1286.3	65.1	1174.5	22.5	1114.5	31.7	94.8914	1286.3	65.1	Wang et al. (2010)
JX-16-28	0.07301	0.00238	1.71781	0.05354	0.17061	0.00526	-	0.73	1014.2	64.7	1015.2	19.8	1015.5	28.9	100.03	1014.2	64.7	Wang et al. (2010)
JX-16-29	0.07454	0.00298	1.82256	0.07008	0.17729	0.0056	-	0.89	1056.1	78.5	1053.6	24.9	1052.2	30.6	99.8671	1056.1	78.5	Wang et al. (2010)
JX-16-30	0.06261	0.0021	0.83039	0.0266	0.09617	0.00296	-	0.32	695	69.9	613.8	14.6	591.9	17.4	96.4321	591.9	17.4	Wang et al. (2010)
JX-16-31	0.08478	0.00344	2.43782	0.09462	0.2085	0.00662	-	1.15	1310.5	76.8	1253.8	27.6	1220.8	35.2	97.368	1310.5	76.8	Wang et al. (2010)
JX-16-32	0.069	0.0026	1.09854	0.03974	0.11545	0.0036	-	0.52	898.7	75.9	752.6	19	704.3	20.8	93.5822	704.3	20.8	Wang et al. (2010)
JX-16-34	0.07231	0.00272	1.49055	0.05364	0.14947	0.00466	-	0.34	994.7	74.6	926.5	21.6	898	26.1	96.9239	898	26.1	Wang et al. (2010)
JX-16-35	0.06423	0.00232	1.0095	0.03498	0.11398	0.00352	-	0.85	749.2	74.5	708.6	17.5	695.8	20.3	98.1936	695.8	20.3	Wang et al. (2010)
JX-16-38	0.09276	0.00308	3.25957	0.10286	0.25483	0.00784	-	0.57	1483	61.6	1471.5	24.2	1463.3	40.2	99.4427	1483	61.6	Wang et al. (2010)
JX-16-39	0.0727	0.00242	1.16467	0.03698	0.11618	0.00356	-	0.41	1005.6	66.1	784.1	17.2	708.5	20.5	90.3584	708.5	20.5	Wang et al. (2010)
JX-16-40	0.08126	0.00364	2.08761	0.0895	0.18632	0.00598	-	1.63	1227.7	85.5	1144.7	29	1101.4	32.4	96.2173	1227.7	85.5	Wang et al. (2010)
JX-16-41	0.10439	0.00342	4.21695	0.13086	0.29297	0.00898	-	0.76	1703.6	59.1	1677.3	25.2	1656.4	44.6	98.7539	1703.6	59.1	Wang et al. (2010)
JX-16-42	0.08114	0.00328	2.11199	0.08134	0.18879	0.00592	-	0.6	1224.8	77.4	1152.7	26.2	1114.8	32	96.7121	1224.8	77.4	Wang et al. (2010)
JX-16-44	0.06604	0.00216	1.02323	0.03178	0.11238	0.00342	-	0.75	807.6	67	715.5	15.8	686.6	19.8	95.9609	686.6	19.8	Wang et al. (2010)
JX-16-45	0.15024	0.0049	9.02204	0.27838	0.43556	0.0133	-	0.89	2348.7	54.7	2340.2	27.8	2330.7	59.4	99.5941	2348.7	54.7	Wang et al. (2010)
JX-16-46	0.07652	0.00286	1.61057	0.05728	0.15267	0.00472	-	0.51	1108.7	72.9	974.3	22	915.9	26.3	94.006	915.9	26.3	Wang et al. (2010)
JX-16-47	0.07292	0.00242	1.52084	0.04774	0.15127	0.0046	-	0.49	1011.7	65.9	938.8	19	908.1	25.7	96.7299	908.1	25.7	Wang et al. (2010)
JX-16-48	0.09334	0.00328	3.30567	0.10982	0.2569	0.00788	-	0.57	1494.8	65.1	1482.4	25.6	1474	40.3	99.4334	1494.8	65.1	Wang et al. (2010)
JX-16-51	0.08208	0.0051	2.15082	0.12854	0.1901	0.00656	-	0.54	1247.4	117.1	1165.3	40.6	1121.9	35.4	96.2756	1247.4	117.1	Wang et al. (2010)
JX-16-53	0.1832	0.00644	11.1631	0.36998	0.44205	0.0137	-	0.5	2682.1	57	2536.8	30.4	2359.8	61	93.0227	2682.1	57	Wang et al. (2010)
JX-16-54	0.08543	0.00292	2.43315	0.07836	0.20664	0.00628	-	0.19	1325.3	64.8	1252.5	22.9	1210.9	33.5	96.6786	1325.3	64.8	Wang et al. (2010)
JX-16-55	0.08385	0.00332	1.90491	0.07142	0.16483	0.00512	-	0.09	1289.1	75.2	1082.8	24.7	983.6	28.3	90.8386	983.6	28.3	Wang et al. (2010)
JX-16-56	0.14256	0.0048	7.73478	0.24426	0.39365	0.01196	-	0.23	2258.5	57	2200.7	28	2139.7	55.1	97.2282	2258.5	57	Wang et al. (2010)
JX-16-57	0.0737	0.00328	1.41704	0.0599	0.13951	0.00438	-	0.47	1033.3	87.4	896.1	24.9	841.9	24.7	93.9516	841.9	24.7	Wang et al. (2010)
JX-16-59	0.07584	0.00294	1.56777	0.05724	0.14999	0.00462	-	1.14	1090.9	75.8	957.5	22.4	900.9	25.8	94.0888	900.9	25.8	Wang et al. (2010)
950: Early Ordovician (N25°45'20″, E114°11'51″)
950-1	0.07694	0.00123	2.09451	0.03617	0.19741	0.00267	-	1.59	1120	16	1147	12	1161	14	104	1120	16	Yao et al. (2011)
950-2	0.0771	0.00124	2.07218	0.03549	0.19495	0.00257	-	0.41	1124	16	1140	12	1148	14	102	1124	16	Yao et al. (2011)
950-3	0.07204	0.00103	1.57536	0.02454	0.15863	0.00204	-	0.74	987	14	961	10	949	11	96	949	11	Yao et al. (2011)
950-4	0.08814	0.00199	2.57184	0.05787	0.21171	0.003	-	0.11	1386	23	1293	16	1238	16	89	1386	23	Yao et al. (2011)
950-5	0.18386	0.00278	13.1022	0.21258	0.51701	0.00681	-	1.29	2688	12	2687	15	2686	29	100	2688	12	Yao et al. (2011)
950-6	0.1167	0.00173	5.50504	0.08887	0.34217	0.00446	-	0.69	1906	13	1901	14	1897	21	100	1906	13	Yao et al. (2011)
950-7	0.07629	0.00113	2.05174	0.03316	0.19508	0.00256	-	0.97	1103	15	1133	11	1149	14	104	1103	15	Yao et al. (2011)
950-8	0.07552	0.00145	1.7358	0.03428	0.16678	0.00228	-	0.68	1082	20	1022	13	994	13	92	994	13	Yao et al. (2011)
950-9	0.07166	0.00109	1.61242	0.02636	0.16328	0.0021	-	0.34	976	15	975	10	975	12	100	975	12	Yao et al. (2011)
950-10	0.05883	0.00161	0.68669	0.01876	0.08465	0.00131	-	2.65	561	33	531	11	524	8	93	524	8	Yao et al. (2011)
950-11	0.06514	0.00115	1.16924	0.02159	0.13026	0.00174	-	1.49	779	19	786	10	789	10	101	789	10	Yao et al. (2011)
950-12	0.07112	0.00099	1.6647	0.02547	0.16982	0.00217	-	1.14	961	14	995	10	1011	12	105	1011	12	Yao et al. (2011)
950-13	0.06392	0.00158	0.96568	0.02406	0.10957	0.00164	-	1.26	739	29	686	12	670	10	91	670	10	Yao et al. (2011)
950-14	0.15868	0.00369	9.93269	0.23043	0.4541	0.00721	-	1.13	2442	20	2429	21	2413	32	99	2442	20	Yao et al. (2011)
950-15	0.07554	0.00104	1.86304	0.02853	0.17887	0.00233	-	0.84	1083	14	1068	10	1061	13	98	1083	14	Yao et al. (2011)
950-16	0.07817	0.00136	2.31931	0.04283	0.2152	0.00302	-	0.59	1151	17	1218	13	1256	16	109	1151	17	Yao et al. (2011)
950-17	0.07357	0.00137	1.74496	0.03405	0.172	0.00238	-	1.22	1030	19	1025	13	1023	13	99	1030	19	Yao et al. (2011)
950-18	0.07747	0.00173	2.03244	0.04654	0.19035	0.00277	-	0.54	1133	24	1126	16	1123	15	99	1133	24	Yao et al. (2011)
950-19	0.21625	0.00366	17.0726	0.31074	0.5727	0.00829	-	0.31	2953	13	2939	17	2919	34	99	2953	13	Yao et al. (2011)
950-20	0.1609	0.00263	10.1172	0.17716	0.45605	0.00647	-	1.61	2465	13	2446	16	2422	29	98	2465	13	Yao et al. (2011)
950-21	0.06959	0.00101	1.49295	0.0239	0.15558	0.00206	-	0.54	916	15	928	10	932	11	102	932	11	Yao et al. (2011)
950-22	0.10355	0.00143	4.33818	0.06578	0.30357	0.00388	-	0.55	1689	13	1701	13	1709	19	101	1689	13	Yao et al. (2011)
950-23	0.08205	0.00113	2.4188	0.03735	0.21379	0.00283	-	0.93	1247	14	1248	11	1249	15	100	1247	14	Yao et al. (2011)
950-24	0.05897	0.00095	0.68856	0.01189	0.08468	0.00112	-	1.23	566	18	532	7	524	7	93	524	7	Yao et al. (2011)
950-25	0.0578	0.00095	0.68647	0.01205	0.08614	0.00115	-	0.92	522	18	531	7	533	7	102	533	7	Yao et al. (2011)
950-26	0.06494	0.00143	1.09134	0.02438	0.12186	0.00173	-	1.47	772	25	749	12	741	10	96	741	10	Yao et al. (2011)
950-27	0.10396	0.0013	4.36075	0.06477	0.30401	0.00432	-	0.62	1696	12	1705	12	1711	21	101	1696	12	Yao et al. (2011)
950-28	0.09843	0.00139	3.7456	0.05962	0.27597	0.00383	-	0.82	1595	13	1581	13	1571	19	98	1595	13	Yao et al. (2011)
950-29	0.062	0.00103	0.87277	0.0157	0.10207	0.00143	-	0.88	674	18	637	9	627	8	93	627	8	Yao et al. (2011)
950-30	0.11094	0.00135	4.84006	0.06882	0.31641	0.00417	-	0.71	1815	12	1792	12	1772	20	98	1815	12	Yao et al. (2011)
950-31	0.07028	0.00114	1.41337	0.02469	0.14587	0.00197	-	1.28	937	17	895	10	878	11	94	878	11	Yao et al. (2011)
950-32	0.07331	0.00107	1.72212	0.02748	0.1704	0.00221	-	0.71	1023	15	1017	10	1014	12	99	1023	15	Yao et al. (2011)
950-33	0.08025	0.00119	2.28375	0.03728	0.20641	0.00272	-	1.62	1203	15	1207	12	1210	15	101	1203	15	Yao et al. (2011)
950-34	0.07388	0.00138	1.71558	0.03339	0.16843	0.0023	-	0.2	1038	19	1014	12	1003	13	97	1038	19	Yao et al. (2011)
950-35	0.07061	0.0014	1.40622	0.02894	0.14444	0.00205	-	1.07	946	21	892	12	870	12	92	870	12	Yao et al. (2011)
950-36	0.10669	0.00149	4.45154	0.0705	0.30264	0.00406	-	0.65	1744	13	1722	13	1704	20	98	1744	13	Yao et al. (2011)
950-37	0.15097	0.0035	7.80605	0.14623	0.375	0.00513	-	0.26	2357	41	2209	17	2053	24	87	2357	41	Yao et al. (2011)
950-38	0.16897	0.00264	11.2641	0.18772	0.48362	0.00624	-	0.98	2547	13	2545	16	2543	27	100	2547	13	Yao et al. (2011)
950-39	0.16155	0.00232	10.4298	0.16807	0.4683	0.0063	-	1.33	2472	12	2474	15	2476	28	100	2472	12	Yao et al. (2011)
950-40	0.08239	0.00138	2.39015	0.04186	0.21043	0.0028	-	0.39	1255	16	1240	13	1231	15	98	1255	16	Yao et al. (2011)
950-41	0.07712	0.0012	1.78966	0.03053	0.16837	0.00232	-	0.53	1124	16	1042	11	1003	13	89	1124	16	Yao et al. (2011)
950-42	0.08125	0.00239	2.31042	0.06058	0.20624	0.00275	-	0.5	1227	59	1215	19	1209	15	99	1227	59	Yao et al. (2011)
950-43	0.07151	0.00096	1.57183	0.02344	0.15942	0.00203	-	0.52	972	14	959	9	954	11	98	954	11	Yao et al. (2011)
950-44	0.07393	0.00235	1.64713	0.05107	0.16164	0.00271	-	1.1	1040	36	988	20	966	15	93	966	15	Yao et al. (2011)
950-45	0.07172	0.00582	1.54901	0.12007	0.1566	0.00484	-	1.05	978	108	950	48	938	27	96	938	27	Yao et al. (2011)
950-46	0.12896	0.00159	6.76172	0.09501	0.38033	0.00485	-	0.76	2084	11	2081	12	2078	23	100	2084	11	Yao et al. (2011)
950-47	0.1454	0.00233	7.78913	0.13086	0.38861	0.00529	-	5.17	2293	13	2207	15	2116	25	92	2293	13	Yao et al. (2011)
950-48	0.07089	0.00093	1.56532	0.02353	0.16017	0.00211	-	0.9	954	14	957	9	958	12	100	958	12	Yao et al. (2011)
950-49	0.08266	0.00147	2.28504	0.04325	0.20053	0.00287	-	2.26	1261	17	1208	13	1178	15	93	1261	17	Yao et al. (2011)
950-50	0.07896	0.00103	2.22333	0.03296	0.20423	0.00265	-	1.62	1171	13	1188	10	1198	14	102	1171	13	Yao et al. (2011)
950-51	0.10467	0.00155	4.37563	0.06922	0.30321	0.00385	-	1.03	1709	13	1708	13	1707	19	100	1709	13	Yao et al. (2011)
950-52	0.06951	0.00093	1.59195	0.02432	0.16613	0.00222	-	0.17	914	14	967	10	991	12	108	991	12	Yao et al. (2011)
950-53	0.10022	0.0013	3.88855	0.0574	0.28142	0.00368	-	1.35	1628	12	1611	12	1599	19	98	1628	12	Yao et al. (2011)
950-54	0.07871	0.00102	2.27524	0.03382	0.20965	0.00276	-	0.66	1165	13	1205	10	1227	15	105	1165	13	Yao et al. (2011)
950-55	0.07405	0.00101	1.73538	0.02639	0.16998	0.0022	-	0.55	1043	14	1022	10	1012	12	97	1043	14	Yao et al. (2011)
950-56	0.18388	0.00233	12.9035	0.18797	0.509	0.00666	-	0.34	2688	11	2673	14	2652	28	99	2688	11	Yao et al. (2011)
950-57	0.1479	0.00236	8.70109	0.15448	0.42673	0.00621	-	0.5	2322	14	2307	16	2291	28	99	2322	14	Yao et al. (2011)
950-58	0.06965	0.00101	1.62028	0.02588	0.16874	0.00224	-	0.27	918	15	978	10	1005	12	109	918	15	Yao et al. (2011)
950-59	0.07419	0.00157	1.73433	0.03715	0.16958	0.00234	-	0.75	1047	22	1021	14	1010	13	96	1047	22	Yao et al. (2011)
950-60	0.20013	0.00252	14.9874	0.21497	0.5432	0.00728	-	1.4	2827	10	2814	14	2797	30	99	2827	10	Yao et al. (2011)
950-61	0.0649	0.00079	1.13809	0.01608	0.1272	0.00163	-	0.8	771	13	772	8	772	9	100	772	9	Yao et al. (2011)
950-62	0.06927	0.00083	1.45874	0.02037	0.15276	0.00196	-	0.13	907	13	913	8	916	11	101	916	11	Yao et al. (2011)
950-63	0.06168	0.00076	0.94384	0.01338	0.111	0.00143	-	0.59	663	14	675	7	679	8	102	679	8	Yao et al. (2011)
950-64	0.06723	0.00126	1.23719	0.02413	0.13348	0.00185	-	0.89	845	20	818	11	808	11	96	808	11	Yao et al. (2011)
950-65	0.07191	0.00147	1.49149	0.0312	0.15045	0.00215	-	0.84	983	21	927	13	903	12	92	903	12	Yao et al. (2011)
950-66	0.07202	0.00099	1.5472	0.02373	0.15581	0.00204	-	0.34	987	14	949	9	933	11	95	933	11	Yao et al. (2011)
950-67	0.07052	0.00101	1.47735	0.02326	0.15196	0.002	-	2.68	944	15	921	10	912	11	97	912	11	Yao et al. (2011)
950-68	0.15444	0.0017	9.45051	0.12463	0.44385	0.00567	-	0.98	2396	10	2383	12	2368	25	99	2396	10	Yao et al. (2011)
950-1: Early Ordovician (N25°45'20″, E114°11'52″)
950-1-1	0.09839	0.00124	3.8288	0.0559	0.28228	0.00372	-	0.86	1594	12	1599	12	1603	19	101	1594	12	Yao et al. (2011)
950-1-2	0.06475	0.00113	1.04297	0.01923	0.11684	0.00158	-	1.38	766	19	725	10	712	9	93	712	9	Yao et al. (2011)
950-1-3	0.16269	0.00206	10.7937	0.15796	0.48126	0.00636	-	2	2484	11	2506	14	2533	28	102	2484	11	Yao et al. (2011)
950-1-4	0.11267	0.00145	5.16592	0.0762	0.33257	0.00436	-	0.26	1843	12	1847	13	1851	21	100	1843	12	Yao et al. (2011)
950-1-5	0.15594	0.00256	9.85374	0.17387	0.45831	0.00628	-	1.74	2412	14	2421	16	2432	28	101	2412	14	Yao et al. (2011)
950-1-6	0.19208	0.00249	14.1245	0.20991	0.53342	0.00702	-	0.91	2760	11	2758	14	2756	30	100	2760	11	Yao et al. (2011)
950-1-7	0.07098	0.00103	1.59548	0.02561	0.16305	0.00217	-	0.82	957	15	968	10	974	12	102	974	12	Yao et al. (2011)
950-1-8	0.07559	0.00102	1.82977	0.02807	0.17559	0.00232	-	1.5	1084	14	1056	10	1043	13	96	1084	14	Yao et al. (2011)
950-1-9	0.07303	0.00127	1.73012	0.0319	0.17186	0.00232	-	1.26	1015	18	1020	12	1022	13	101	1015	18	Yao et al. (2011)
950-1-10	0.06729	0.00389	1.05676	0.05862	0.1139	0.00267	-	0.64	847	76	732	29	695	15	82	695	15	Yao et al. (2011)
950-1-11	0.07006	0.00093	1.49247	0.0222	0.15454	0.00202	-	1.27	930	14	927	9	926	11	100	926	11	Yao et al. (2011)
950-1-12	0.06438	0.00093	1.10486	0.01782	0.12453	0.0017	-	0.63	754	15	756	9	757	10	100	757	10	Yao et al. (2011)
950-1-13	0.06476	0.00097	1.12411	0.01839	0.12594	0.00169	-	1.86	767	16	765	9	765	10	100	765	10	Yao et al. (2011)
950-1-14	0.06937	0.00077	1.45075	0.01921	0.15171	0.00194	-	0.63	910	12	910	8	911	11	100	911	11	Yao et al. (2011)
950-1-15	0.14268	0.00187	8.21326	0.12239	0.41789	0.00602	-	0.47	2260	12	2255	13	2251	27	100	2260	12	Yao et al. (2011)
950-1-16	0.07022	0.00093	1.49553	0.02215	0.1545	0.002	-	0.47	935	14	929	9	926	11	99	926	11	Yao et al. (2011)
950-1-17	0.0711	0.00122	1.54847	0.02813	0.15799	0.0022	-	0.96	960	17	950	11	946	12	99	946	12	Yao et al. (2011)
950-1-18	0.06792	0.00092	1.19386	0.01791	0.12751	0.00168	-	0.41	866	14	798	8	774	10	89	774	10	Yao et al. (2011)
950-1-19	0.0708	0.00088	1.5621	0.02218	0.16004	0.00204	-	1.58	952	13	955	9	957	11	101	957	11	Yao et al. (2011)
950-1-20	0.11033	0.00137	4.80612	0.06829	0.31609	0.00404	-	0.34	1805	12	1786	12	1771	20	98	1805	12	Yao et al. (2011)
950-1-21	0.05808	0.00083	0.70548	0.01108	0.08809	0.00114	-	0.45	533	16	542	7	544	7	102	544	7	Yao et al. (2011)
950-1-22	0.16071	0.00244	8.31246	0.13554	0.37521	0.00489	-	2.6	2463	13	2266	15	2054	23	83	2463	13	Yao et al. (2011)
950-1-23	0.07595	0.00166	1.83537	0.04061	0.17532	0.00249	-	1.13	1094	23	1058	15	1041	14	95	1094	23	Yao et al. (2011)
950-1-24	0.09485	0.00141	3.40984	0.05616	0.2607	0.00367	-	0.99	1525	14	1507	13	1493	19	98	1525	14	Yao et al. (2011)
950-1-25	0.07534	0.00144	1.91068	0.0377	0.18394	0.00255	-	1.08	1078	19	1085	13	1088	14	101	1078	19	Yao et al. (2011)
950-1-26	0.07576	0.00148	1.93716	0.03933	0.18552	0.00264	-	1.2	1089	20	1094	14	1097	14	101	1089	20	Yao et al. (2011)
950-1-27	0.0797	0.00158	2.04217	0.04114	0.18576	0.00253	-	0.87	1190	20	1130	14	1098	14	92	1190	20	Yao et al. (2011)
950-1-28	0.10531	0.00162	4.43364	0.07376	0.30539	0.00407	-	0.51	1720	14	1719	14	1718	20	100	1720	14	Yao et al. (2011)
950-1-29	0.07709	0.00146	1.95701	0.03831	0.18414	0.00257	-	1.3	1124	19	1101	13	1090	14	97	1124	19	Yao et al. (2011)
950-1-30	0.1292	0.00242	6.66299	0.1282	0.374	0.00521	-	0.52	2087	16	2068	17	2048	24	98	2087	16	Yao et al. (2011)
950-1-31	0.07076	0.00131	1.54863	0.02983	0.1588	0.00216	-	0.92	950	19	950	12	950	12	100	950	12	Yao et al. (2011)
950-1-32	0.21084	0.00276	16.7794	0.24811	0.57721	0.0076	-	0.87	2912	11	2922	14	2937	31	101	2912	11	Yao et al. (2011)
950-1-33	0.16321	0.00375	9.94728	0.22915	0.44236	0.00675	-	0.97	2489	20	2430	21	2361	30	95	2489	20	Yao et al. (2011)
950-1-34	0.08016	0.00114	2.21807	0.03461	0.20068	0.00258	-	1.22	1201	14	1187	11	1179	14	98	1201	14	Yao et al. (2011)
950-1-35	0.07795	0.00203	2.07706	0.05368	0.19331	0.00294	-	1.39	1146	28	1141	18	1139	16	99	1146	28	Yao et al. (2011)
950-1-36	0.06742	0.00198	1.27335	0.03719	0.13697	0.00215	-	0.02	851	35	834	17	828	12	97	828	12	Yao et al. (2011)
950-1-37	0.07726	0.00125	1.97358	0.03405	0.18528	0.00251	-	0.97	1128	16	1107	12	1096	14	97	1128	16	Yao et al. (2011)
950-1-38	0.07153	0.00123	1.55192	0.02808	0.15736	0.0021	-	0.71	973	18	951	11	942	12	97	942	12	Yao et al. (2011)
950-1-39	0.05898	0.00174	0.70434	0.02059	0.08667	0.00135	-	1.75	566	37	541	12	536	8	95	536	8	Yao et al. (2011)
950-1-40	0.07253	0.00087	1.61718	0.02255	0.1617	0.00206	-	0.43	1001	13	977	9	966	11	97	966	11	Yao et al. (2011)
950-1-41	0.07262	0.00111	1.6354	0.02719	0.16335	0.00216	-	1.18	1003	15	984	10	975	12	97	975	12	Yao et al. (2011)
950-1-42	0.07179	0.00094	1.56835	0.02341	0.15843	0.00206	-	1.69	980	14	958	9	948	11	97	948	11	Yao et al. (2011)
950-1-43	0.07714	0.00257	1.99711	0.06511	0.18783	0.00335	-	1.31	1125	37	1115	22	1110	18	99	1125	37	Yao et al. (2011)
950-1-44	0.07157	0.001	1.56722	0.02438	0.15882	0.00206	-	0.76	974	14	957	10	950	11	98	950	11	Yao et al. (2011)
950-1-45	0.06942	0.00085	1.40993	0.01987	0.14733	0.00186	-	0.21	911	13	893	8	886	10	97	886	10	Yao et al. (2011)
950-1-46	0.07349	0.0012	1.75088	0.0312	0.1728	0.00251	-	1.15	1027	16	1027	12	1028	14	100	1027	16	Yao et al. (2011)
950-1-47	0.0605	0.00126	0.72027	0.0154	0.08637	0.00121	-	1.47	622	24	551	9	534	7	86	534	7	Yao et al. (2011)
950-1-48	0.07203	0.00084	1.65337	0.02283	0.16644	0.00213	-	1.3	987	13	991	9	992	12	101	992	12	Yao et al. (2011)
950-1-49	0.06012	0.00159	0.85667	0.02291	0.10338	0.00161	-	0.97	608	32	628	13	634	9	104	634	9	Yao et al. (2011)
950-1-50	0.16292	0.00205	10.6625	0.1565	0.47469	0.00628	-	1.18	2486	11	2494	14	2504	27	101	2486	11	Yao et al. (2011)
950-1-51	0.07125	0.00114	1.63164	0.0287	0.1661	0.00231	-	0.51	965	17	982	11	991	13	103	991	13	Yao et al. (2011)
950-1-52	0.07178	0.00104	1.61938	0.02603	0.16364	0.00218	-	0.6	980	15	978	10	977	12	100	977	12	Yao et al. (2011)
950-1-53	0.05929	0.00162	0.73766	0.02008	0.09024	0.00139	-	1.67	578	33	561	12	557	8	96	557	8	Yao et al. (2011)
950-1-54	0.10074	0.00141	3.9765	0.06211	0.28631	0.00379	-	0.87	1638	13	1629	13	1623	19	99	1638	13	Yao et al. (2011)
950-1-55	0.07543	0.00128	1.98835	0.03578	0.19122	0.0026	-	0.64	1080	17	1112	12	1128	14	104	1080	17	Yao et al. (2011)
950-1-56	0.06125	0.00099	0.92397	0.01613	0.10943	0.00147	-	0.38	648	17	664	9	669	9	103	669	9	Yao et al. (2011)
950-1-57	0.08325	0.00142	2.61709	0.04692	0.22803	0.00304	-	0.38	1275	17	1305	13	1324	16	104	1275	17	Yao et al. (2011)
950-1-58	0.3764	0.00835	41.3974	0.95163	0.79799	0.01295	-	0.28	3817	17	3805	23	3782	46	99	3817	17	Yao et al. (2011)
950-1-59	0.08544	0.00121	2.12616	0.03389	0.18051	0.00245	-	0.14	1326	14	1157	11	1070	13	81	1326	14	Yao et al. (2011)
950-1-60	0.17916	0.00426	10.1964	0.23965	0.41281	0.00616	-	0.45	2645	20	2453	22	2228	28	84	2645	20	Yao et al. (2011)
950-1-61	0.07682	0.00144	1.96578	0.03816	0.18557	0.00257	-	1.22	1117	19	1104	13	1097	14	98	1117	19	Yao et al. (2011)
950-1-62	0.06914	0.00134	1.41517	0.02858	0.14846	0.00209	-	0.74	903	20	895	12	892	12	99	892	12	Yao et al. (2011)
950-1-63	0.07865	0.00116	2.10798	0.03385	0.19439	0.00254	-	0.31	1163	14	1151	11	1145	14	98	1163	14	Yao et al. (2011)
950-1-64	0.06308	0.00095	0.97649	0.01624	0.11228	0.00152	-	0.26	711	16	692	8	686	9	96	686	9	Yao et al. (2011)
950-1-65	0.07901	0.00198	1.73967	0.04328	0.15966	0.00234	-	0.17	1172	27	1023	16	955	13	81	955	13	Yao et al. (2011)
950-1-66	0.08425	0.00118	2.53987	0.03971	0.21866	0.00291	-	0.28	1298	14	1284	11	1275	15	98	1298	14	Yao et al. (2011)
950-2: Early Ordovician (N25°45'20″, E114°11'53″)
950-2-01	0.07188	0.00086	1.66565	0.02235	0.16764	0.00103	-	1.68	982	17	996	9	999	6	102	999	6	Yao et al. (2011)
950-2-02	0.1127	0.00048	5.18613	0.05984	0.33287	0.00363	-	0.31	1843	9	1850	10	1852	18	100	1843	9	Yao et al. (2011)
950-2-03	0.08521	0.00237	2.18734	0.07654	0.18998	0.00337	-	0.62	1320	41	1177	24	1121	18	85	1320	41	Yao et al. (2011)
950-2-04	0.09477	0.00131	3.85628	0.06513	0.29352	0.00354	-	0.82	1523	15	1605	14	1659	18	109	1523	15	Yao et al. (2011)
950-2-05	0.07602	0.0009	2.11933	0.03186	0.20112	0.00179	-	0.59	1096	16	1155	10	1181	10	108	1096	16	Yao et al. (2011)
950-2-06	0.07697	0.00069	2.13612	0.02394	0.20061	0.00186	-	0.54	1120	10	1161	8	1179	10	105	1120	10	Yao et al. (2011)
950-2-07	0.0687	0.00081	1.00364	0.01191	0.10562	0.00072	-	0.51	890	14	706	6	647	4	73	647	4	Yao et al. (2011)
950-2-08	0.0716	0.00099	1.74751	0.02586	0.17622	0.00209	-	0.39	975	14	1026	10	1046	11	107	975	14	Yao et al. (2011)
950-2-09	0.06	0.00075	0.87847	0.01232	0.10569	0.00061	-	0.1	604	20	640	7	648	4	107	648	4	Yao et al. (2011)
950-2-10	0.0692	0.00057	1.45571	0.01343	0.15208	0.00076	-	0.73	905	11	912	6	913	4	101	913	4	Yao et al. (2011)
950-2-11	0.10281	0.00088	4.18496	0.04025	0.2944	0.00144	-	0.45	1676	11	1671	8	1663	7	99	1676	11	Yao et al. (2011)
950-2-12	0.07205	0.00075	1.61329	0.01702	0.16224	0.00083	-	0.51	987	13	975	7	969	5	98	969	5	Yao et al. (2011)
950-2-13	0.07251	0.00059	1.71607	0.01764	0.17117	0.00105	-	0.82	1000	11	1015	7	1019	6	102	1000	11	Yao et al. (2011)
950-2-14	0.08179	0.00054	2.37042	0.0279	0.20914	0.00171	-	0.24	1241	11	1234	8	1224	9	99	1241	11	Yao et al. (2011)
950-2-15	0.05968	0.00056	0.72993	0.00697	0.08858	0.00034	-	0.8	592	14	557	4	547	2	92	547	2	Yao et al. (2011)
950-2-16	0.07896	0.00104	2.16688	0.03512	0.19934	0.00221	-	0.99	1171	16	1170	11	1172	12	100	1171	16	Yao et al. (2011)
950-2-17	0.15604	0.00067	9.73136	0.05858	0.45157	0.00196	-	0.47	2413	5	2410	6	2402	9	100	2413	5	Yao et al. (2011)
950-2-18	0.07853	0.00102	1.9522	0.03122	0.18058	0.00183	-	0.62	1160	17	1099	11	1070	10	92	1160	17	Yao et al. (2011)
950-2-19	0.07997	0.00054	2.32845	0.02128	0.21121	0.00139	-	0.61	1196	9	1221	6	1235	7	103	1196	9	Yao et al. (2011)
950-2-20	0.07389	0.00124	1.72932	0.02933	0.17011	0.00108	-	0.63	1038	24	1019	11	1013	6	98	1038	24	Yao et al. (2011)
950-2-21	0.08177	0.00127	2.33334	0.04467	0.20652	0.00194	-	0.64	1240	23	1222	14	1210	10	98	1240	23	Yao et al. (2011)
950-2-22	0.07063	0.00051	1.62665	0.01265	0.16725	0.0007	-	0.48	947	9	981	5	997	4	105	997	4	Yao et al. (2011)
950-2-23	0.06991	0.00089	1.57601	0.0201	0.1639	0.00087	-	0.49	926	17	961	8	978	5	106	978	5	Yao et al. (2011)
950-2-24	0.06639	0.00051	1.24511	0.01125	0.13613	0.00059	-	0.61	819	12	821	5	823	3	100	823	3	Yao et al. (2011)
950-2-25	0.14975	0.00142	9.10435	0.24628	0.43491	0.00956	-	0.69	2343	21	2349	25	2328	43	99	2343	21	Yao et al. (2011)
950-2-26	0.19678	0.00092	14.3209	0.09966	0.52797	0.00337	-	0.46	2800	5	2771	7	2733	14	98	2800	5	Yao et al. (2011)
950-2-27	0.07484	0.00063	1.64268	0.01427	0.15935	0.00096	-	0.4	1064	9	987	5	953	5	90	953	5	Yao et al. (2011)
950-2-28	0.16174	0.00139	9.4442	0.11979	0.42217	0.00394	-	0.62	2474	10	2382	12	2270	18	92	2474	10	Yao et al. (2011)
950-2-29	0.06659	0.00131	1.25804	0.02603	0.13708	0.00196	-	0.78	825	21	827	12	828	11	100	828	11	Yao et al. (2011)
950-2-30	0.08196	0.00289	2.39507	0.08332	0.21201	0.00374	-	1.28	1245	41	1241	25	1240	20	100	1245	41	Yao et al. (2011)
950-2-31	0.08298	0.00119	2.49447	0.04044	0.21811	0.00297	-	1.08	1269	14	1270	12	1272	16	100	1269	14	Yao et al. (2011)
950-2-32	0.07673	0.00136	1.96752	0.03726	0.18605	0.00263	-	1.58	1114	18	1104	13	1100	14	99	1114	18	Yao et al. (2011)
950-2-33	0.15816	0.002	9.9989	0.14854	0.45867	0.00616	-	0.98	2436	11	2435	14	2434	27	100	2436	11	Yao et al. (2011)
950-2-34	0.15894	0.00255	10.0836	0.17567	0.4603	0.0067	-	1.86	2444	13	2442	16	2441	30	100	2444	13	Yao et al. (2011)
950-2-35	0.16034	0.00226	10.233	0.1597	0.46297	0.00625	-	1.66	2459	12	2456	14	2453	28	100	2459	12	Yao et al. (2011)
950-2-36	0.0703	0.00203	1.49136	0.04291	0.15389	0.00237	-	0.59	937	34	927	17	923	13	99	923	13	Yao et al. (2011)
950-2-37	0.0633	0.00136	1.00911	0.02229	0.11565	0.00161	-	1.34	718	25	708	11	705	9	98	705	9	Yao et al. (2011)
950-2-38	0.15858	0.00231	9.89843	0.15824	0.45281	0.0062	-	0.00231	2441	12	2425	15	2408	28	99	2441	12	Yao et al. (2011)
950-2-39	0.07632	0.00121	1.94643	0.03332	0.18501	0.00247	-	1.05	1103	16	1097	11	1094	13	99	1103	16	Yao et al. (2011)
950-2-40	0.07093	0.00108	1.58528	0.02636	0.16213	0.00215	-	0.6	955	16	964	10	969	12	101	969	12	Yao et al. (2011)
950-2-41	0.06916	0.00113	1.43932	0.02583	0.151	0.00212	-	0.5	904	17	905	11	907	12	100	907	12	Yao et al. (2011)
950-2-42	0.06288	0.00129	0.99065	0.02135	0.11431	0.00165	-	0.47	704	23	699	11	698	10	99	698	10	Yao et al. (2011)
950-2-43	0.07919	0.00104	2.17263	0.03346	0.19907	0.00272	-	0.18	1177	14	1172	11	1170	15	99	1177	14	Yao et al. (2011)
950-2-44	0.41362	0.01069	47.955	1.22495	0.84069	0.01255	-	0.24	3959	21	3951	25	3933	44	99	3959	21	Yao et al. (2011)
950-2-45	0.06273	0.0011	0.86358	0.01607	0.09984	0.00136	-	0.85	699	19	632	9	613	8	88	613	8	Yao et al. (2011)
950-2-46	0.05756	0.0015	0.67952	0.01744	0.0856	0.00123	-	1.78	513	32	526	11	529	7	103	529	7	Yao et al. (2011)
950-2-47	0.06909	0.00112	1.19311	0.02055	0.12524	0.00165	-	0.7	901	17	797	10	761	9	84	761	9	Yao et al. (2011)
950-2-48	0.06521	0.00105	1.33504	0.02246	0.14844	0.00188	-	0.35	781	17	861	10	892	11	114	892	11	Yao et al. (2011)
950-2-49	0.0806	0.00135	2.26696	0.04025	0.20398	0.00274	-	1.57	1212	16	1202	13	1197	15	99	1212	16	Yao et al. (2011)
950-2-50	0.16188	0.00224	10.0032	0.15392	0.44819	0.00601	-	0.9	2475	12	2435	14	2387	27	96	2475	12	Yao et al. (2011)
950-2-51	0.06742	0.00149	1.22715	0.02839	0.13208	0.00213	-	0.44	851	24	813	13	800	12	94	800	12	Yao et al. (2011)
950-2-52	0.15663	0.00254	9.71423	0.17055	0.44984	0.00637	-	1.7	2420	14	2408	16	2395	28	99	2420	14	Yao et al. (2011)
950-2-53	0.09852	0.00159	3.69667	0.06479	0.27216	0.00378	-	0.5	1596	15	1571	14	1552	19	97	1596	15	Yao et al. (2011)
950-2-54	0.16968	0.00224	9.92789	0.14705	0.4244	0.00548	-	0.49	2554	11	2428	14	2280	25	89	2554	11	Yao et al. (2011)
950-2-55	0.08908	0.00108	2.82765	0.04019	0.23023	0.00299	-	1.01	1406	12	1363	11	1336	16	95	1406	12	Yao et al. (2011)
950-2-56	0.07288	0.00126	1.64511	0.02955	0.16368	0.00211	-	0.37	1011	18	988	11	977	12	97	977	12	Yao et al. (2011)
950-2-57	0.07167	0.00107	1.54097	0.0248	0.15593	0.00199	-	0.74	977	15	947	10	934	11	96	934	11	Yao et al. (2011)
950-2-58	0.06937	0.00107	1.19387	0.02015	0.12483	0.00169	-	0.68	910	16	798	9	758	10	83	758	10	Yao et al. (2011)
950-2-59	0.07152	0.0014	1.6244	0.03289	0.1647	0.00224	-	0.53	972	21	980	13	983	12	101	983	12	Yao et al. (2011)
950-2-60	0.06283	0.00286	0.82053	0.03619	0.09472	0.00183	-	0	702	61	608	20	583	11	83	583	11	Yao et al. (2011)
950-2-61	0.07245	0.00126	1.66648	0.03082	0.16685	0.00227	-	0.13	999	18	996	12	995	13	100	995	13	Yao et al. (2011)
950-2-62	0.16496	0.00347	10.6713	0.23132	0.46936	0.00659	-	0.82	2507	19	2495	20	2481	29	99	2507	19	Yao et al. (2011)
950-2-63	0.06085	0.00096	0.89121	0.01543	0.10624	0.00146	-	0.44	634	17	647	8	651	9	103	651	9	Yao et al. (2011)
950-2-64	0.10684	0.00156	4.53927	0.07302	0.30819	0.00411	-	0.93	1746	13	1738	13	1732	20	99	1746	13	Yao et al. (2011)
950-2-65	0.06099	0.00108	0.80259	0.01485	0.09545	0.00126	-	0.63	639	19	598	8	588	7	92	588	7	Yao et al. (2011)
950-2-66	0.07618	0.00157	1.8196	0.03941	0.17353	0.00283	-	0.14	1100	20	1053	14	1032	16	94	1100	20	Yao et al. (2011)
950-2-67	0.07322	0.00124	1.71735	0.03115	0.17015	0.00236	-	0.82	1020	17	1015	12	1013	13	99	1020	17	Yao et al. (2011)
950-2-68	0.07492	0.00102	1.80764	0.0279	0.17501	0.00234	-	0.49	1066	14	1048	10	1040	13	98	1066	14	Yao et al. (2011)
950-2-69	0.07841	0.00106	2.09936	0.03215	0.19421	0.00257	-	0.55	1157	14	1149	11	1144	14	99	1157	14	Yao et al. (2011)
950-2-70	0.07571	0.00115	1.89877	0.03182	0.18193	0.00249	-	0.79	1087	15	1081	11	1078	14	99	1087	15	Yao et al. (2011)
950-2-71	0.06008	0.00132	0.71882	0.0162	0.08679	0.00126	-	0.44	606	25	550	10	537	7	89	537	7	Yao et al. (2011)
950-2-72	0.09258	0.00186	3.28056	0.06976	0.25705	0.00417	-	0.55	1479	19	1476	17	1475	21	100	1479	19	Yao et al. (2011)
950-2-73	0.07475	0.00092	2.01666	0.02895	0.1957	0.00258	-	0.42	1062	13	1121	10	1152	14	108	1062	13	Yao et al. (2011)
950-2-74	0.07434	0.00113	1.94422	0.03297	0.18971	0.00264	-	0.42	1051	15	1096	11	1120	14	107	1051	15	Yao et al. (2011)
950-2-75	0.07801	0.0015	2.06537	0.04115	0.19203	0.0027	-	0.76	1147	19	1137	14	1132	15	99	1147	19	Yao et al. (2011)
950-2-76	0.05809	0.00118	0.69044	0.01465	0.08622	0.00129	-	1.61	533	23	533	9	533	8	100	533	8	Yao et al. (2011)
950-2-77	0.08135	0.00129	2.371	0.04069	0.21142	0.00288	-	0.5	1230	15	1234	12	1236	15	100	1230	15	Yao et al. (2011)
950-2-78	0.17084	0.00251	11.3669	0.18612	0.48267	0.00655	-	0.13	2566	12	2554	15	2539	28	99	2566	12	Yao et al. (2011)
950-2-79	0.08744	0.00124	2.93517	0.04661	0.2435	0.00325	-	0.85	1370	14	1391	12	1405	17	103	1370	14	Yao et al. (2011)
950-2-80	0.07343	0.00109	1.74705	0.02856	0.17258	0.00229	-	1.2	1026	15	1026	11	1026	13	100	1026	15	Yao et al. (2011)

## Sheet: Guangdong sub-basin
Table S3: U-Pb isotopic compositions and ages of detrital zircons from the Guangdong sub-basin
	207Pb/206Pb		207Pb/235U		206Pb/238U			Th/U	207Pb/206Pb		207Pb/235U		206Pb/238U		Con.
Spot.	Ratio	1sigma	Ratio	1sigma	Ratio	1sigma	rho	Ratio	Age (Ma)	1sigma	Age (Ma)	1sigma	Age (Ma)	1sigma		Used age	1sigma	Reference
Xiafang Fm, Cryogenian, N 25°19'44", E 114°42'32"
16ZT-12-01	0.0820365	3.45206	2.42158	4.9605	0.212865	0.00144881	0.470211	0.484258	1255.55	35.4161	1249.03	22.5455	1244.07	15.7169	99%	1255.55	35.4161	Qi et al. (2018)
16ZT-12-02	0.0784039	3.45464	2.08506	5.87231	0.192385	0.00173431	0.399257	0.344059	1166.67	74.5934	1143.9	23.9933	1134.28	15.6194	99%	1166.67	74.5934	Qi et al. (2018)
16ZT-12-03	0.0731194	3.45146	1.50116	4.07648	0.148001	0.000882862	0.431961	1.08734	1016.66	36.2631	930.856	17.1187	889.747	10.9817	95%	889.747	10.9817	Qi et al. (2018)
16ZT-12-04	0.073725	3.452	1.747	4.61825	0.17097	0.00153435	0.522369	0.132895	1035.19	31.9465	1026.05	19.8262	1017.46	14.0326	99%	1035.19	31.9465	Qi et al. (2018)
16ZT-12-05	0.0793525	3.45387	1.90582	5.44086	0.17287	0.00125503	0.332821	0.858004	1181.17	44.9077	1083.13	22.6252	1027.9	13.2566	94%	1181.17	44.9077	Qi et al. (2018)
16ZT-12-06	0.124898	3.4559	5.99487	10.5389	0.346493	0.00268025	0.466656	0.772337	2027.47	43.827	1975.1	34.7641	1917.83	24.7139	97%	2027.47	43.827	Qi et al. (2018)
16ZT-12-07	0.0759991	3.45246	1.75906	4.64369	0.16701	0.00115464	0.399999	0.446063	1094.44	38.0646	1030.5	19.9384	995.614	12.685	96%	995.614	12.685	Qi et al. (2018)
16ZT-12-08	0.0790403	3.45285	2.00333	4.96718	0.183207	0.00146953	0.457199	0.854243	1173.15	39.8765	1116.64	21.4703	1084.47	14.3788	97%	1173.15	39.8765	Qi et al. (2018)
16ZT-12-09	0.0759797	3.4526	1.82709	4.7689	0.173599	0.00121059	0.394666	0.201158	1094.44	39.3062	1055.24	20.4944	1031.91	13.1671	97%	1094.44	39.3062	Qi et al. (2018)
16ZT-12-10	0.0851954	3.45308	2.7232	6.0073	0.230675	0.00183288	0.443834	0.365182	1320.37	39.4613	1334.81	25.1736	1338.04	17.5877	99%	1320.37	39.4613	Qi et al. (2018)
16ZT-12-11	0.073694	3.45251	1.71246	4.81724	0.167452	0.00122371	0.379298	0.244352	1033.03	69.584	1013.21	20.3917	998.056	12.9027	98%	998.056	12.9027	Qi et al. (2018)
16ZT-12-12	0.0766483	3.45205	1.94744	4.67527	0.183481	0.00127449	0.438005	0.50812	1122.22	35.8441	1097.57	20.5461	1085.97	13.8288	98%	1122.22	35.8441	Qi et al. (2018)
16ZT-12-13	0.0629167	3.45294	0.835884	4.00714	0.0959383	0.000724989	0.326752	0.309189	705.565	49.4508	616.872	14.557	590.562	7.77738	0.85	590.562	7.77738	Qi et al. (2018)
16ZT-12-14	0.0689578	3.45195	1.54099	4.35996	0.161528	0.00114285	0.421556	0.57235	898.15	37.2948	946.899	18.3511	965.264	12.3791	98%	965.264	12.3791	Qi et al. (2018)
16ZT-12-15	0.0689177	3.45455	1.44049	5.05312	0.151913	0.00153506	0.400427	0.469624	895.99	55.583	905.923	20.9575	911.677	13.214	99%	911.677	13.214	Qi et al. (2018)
16ZT-12-16	0.0761423	3.45309	2.09674	5.33508	0.199038	0.00157466	0.412859	0.90026	1098.15	41.6908	1147.74	22.614	1170.15	15.4191	98%	1098.15	41.6908	Qi et al. (2018)
16ZT-12-17	0.082491	3.45358	2.51724	5.89612	0.220547	0.00170623	0.411065	0.709962	1257.4	42.1489	1277.02	24.6026	1284.77	16.7755	99%	1257.4	42.1489	Qi et al. (2018)
16ZT-12-18	0.0961445	3.45473	3.59027	7.57857	0.269703	0.00205057	0.406402	0.629127	1550.31	43.0517	1547.38	28.8933	1539.29	19.8942	99%	1550.31	43.0517	Qi et al. (2018)
16ZT-12-19	0.0679885	3.462	1.23299	6.00756	0.132737	0.00158194	0.301395	0.476492	877.775	83.5932	815.699	25.7322	803.463	12.6234	98%	803.463	12.6234	Qi et al. (2018)
16ZT-12-20	0.0705631	3.45191	1.60835	4.38477	0.164409	0.00114179	0.425036	0.215662	946.29	31.5021	973.466	18.6464	981.23	12.5195	99%	981.23	12.5195	Qi et al. (2018)
16ZT-12-21	0.126421	3.45456	6.68518	10.1304	0.381013	0.00255081	0.470972	0.533511	2049.99	41.054	2070.66	35.4579	2081.02	25.8272	99%	2049.99	41.054	Qi et al. (2018)
16ZT-12-22	0.0828829	3.45887	1.94231	7.22358	0.168046	0.0015721	0.287806	0.157799	1266.35	61.8953	1095.8	27.976	1001.34	14.032	90%	1266.35	61.8953	Qi et al. (2018)
16ZT-12-23	0.0759803	3.45321	1.92654	5.18601	0.182516	0.00138698	0.383487	0.647586	1094.44	42.9311	1090.34	21.9167	1080.71	14.1007	99%	1094.44	42.9311	Qi et al. (2018)
16ZT-12-24	0.0637816	3.45259	0.898925	3.97791	0.101434	0.000769589	0.364362	0.636783	709.3	45.8662	656.4	14.5146	637.2	8.33846	0.97	637.2	8.33846	Qi et al. (2018)
16ZT-12-25	0.165758	3.46354	11.4532	21.4745	0.49732	0.00411996	0.447858	0.826805	2516.66	50.9212	2560.77	44.499	2602.27	33.7044	98%	2516.66	50.9212	Qi et al. (2018)
16ZT-12-26	0.0699983	3.45249	1.55377	4.55585	0.159865	0.00122585	0.410216	0.631559	927.775	36.3447	951.992	19.1255	956.025	12.541	99%	956.025	12.541	Qi et al. (2018)
16ZT-12-27	0.0698053	3.45309	1.48931	4.71036	0.153819	0.00129183	0.398181	1.05598	924.07	45.0833	926.035	19.5985	922.334	12.4609	99%	922.334	12.4609	Qi et al. (2018)
16ZT-12-28	0.0720537	3.45221	1.6559	4.52145	0.165681	0.00120363	0.422071	0.591836	987.04	37.584	991.81	19.2617	988.271	12.7581	99%	988.271	12.7581	Qi et al. (2018)
16ZT-12-29	0.0808532	3.45441	2.2209	5.86023	0.198603	0.00163873	0.390499	0.995199	1217.59	46.8318	1187.65	24.0958	1167.81	15.5915	98%	1217.59	46.8318	Qi et al. (2018)
16ZT-12-30	0.0761606	3.45245	1.93973	4.89878	0.183456	0.00127492	0.394464	1.45811	1099.08	38.3717	1094.9	21.137	1085.83	13.8287	99%	1099.08	38.3717	Qi et al. (2018)
16ZT-12-31	0.075042	3.45439	1.75949	5.27258	0.16971	0.00126393	0.333056	0.145108	1069.44	45.0418	1030.66	21.955	1010.51	13.1292	98%	1069.44	45.0418	Qi et al. (2018)
16ZT-12-32	0.0976585	3.45653	3.58239	9.76923	0.263366	0.00355235	0.530008	1.89786	1579.94	47.9434	1545.64	31.9498	1507.04	24.577	97%	1579.94	47.9434	Qi et al. (2018)
16ZT-12-33	0.0701912	3.45239	1.50936	4.4906	0.155073	0.00108442	0.376831	0.0733877	1000	41.3394	934.182	18.7688	929.337	11.8905	99%	929.337	11.8905	Qi et al. (2018)
16ZT-12-34	0.0729372	3.45346	1.68572	5.05891	0.166667	0.00124145	0.344659	0.191676	1012.96	46.0092	1003.15	21.161	993.719	12.9162	99%	993.719	12.9162	Qi et al. (2018)
16ZT-12-35	0.0758524	3.45251	1.55048	4.41706	0.147646	0.00107667	0.421649	0.536385	1100	38.3785	950.686	18.5945	887.757	11.4964	93%	887.757	11.4964	Qi et al. (2018)
16ZT-12-36	0.0797645	3.46489	2.05248	8.92403	0.185872	0.00141913	0.190995	0.569972	1190.74	86.3846	1133.12	32.7745	1098.97	14.3527	96%	1190.74	86.3846	Qi et al. (2018)
16ZT-12-37	0.078708	3.45291	1.97274	4.98203	0.181009	0.00131403	0.405054	0.770434	1164.82	71.4509	1106.24	21.4404	1072.48	13.8187	96%	1164.82	71.4509	Qi et al. (2018)
16ZT-12-38	0.0786231	3.45189	2.08137	4.72635	0.190761	0.00135765	0.468008	0.190496	1162.66	29.6942	1142.69	21.0631	1125.5	14.4106	98%	1162.66	29.6942	Qi et al. (2018)
16ZT-12-39	0.0713865	3.4519	1.56667	4.34033	0.158197	0.00109259	0.423802	0.115563	968.515	16.4618	957.108	18.3561	946.752	12.0706	98%	946.752	12.0706	Qi et al. (2018)
16ZT-12-40	0.0745191	3.45383	1.68099	5.03087	0.16296	0.00127351	0.364494	0.456306	1057.41	46.8374	1001.36	21.059	973.204	12.834	97%	973.204	12.834	Qi et al. (2018)
16ZT-12-41	0.127354	3.45791	6.33131	12.115	0.358668	0.0027403	0.417171	0.56709	2062.03	46.3554	2022.8	36.1564	1975.86	25.349	97%	2062.03	46.3554	Qi et al. (2018)
16ZT-12-42	0.0715047	3.45262	1.5478	4.54452	0.156205	0.00111143	0.381514	0.266533	972.225	41.1717	949.615	19.0687	935.653	12.0243	98%	935.653	12.0243	Qi et al. (2018)
16ZT-12-43	0.0778269	3.45307	1.97741	5.09646	0.183493	0.00137326	0.400501	0.671071	1142.6	45.5016	1107.84	21.7613	1086.03	14.1071	98%	1142.6	45.5016	Qi et al. (2018)
16ZT-12-44	0.0805899	3.45352	2.09018	5.33912	0.187508	0.00147262	0.40802	0.679201	1212.96	43.0457	1145.58	22.6126	1107.86	14.5868	96%	1212.96	43.0457	Qi et al. (2018)
16ZT-12-45	0.0770523	3.45195	1.93013	4.60273	0.180756	0.00116393	0.417426	0.157759	1124.08	35.5932	1091.58	20.2989	1071.11	13.399	98%	1124.08	35.5932	Qi et al. (2018)
16ZT-12-46	0.0760161	3.45335	1.96186	5.5825	0.186163	0.00187526	0.455245	1.35298	1095.37	48.2062	1102.52	23.0913	1100.56	15.8359	99%	1095.37	48.2062	Qi et al. (2018)
16ZT-12-47	0.0737831	3.45387	1.63192	4.94465	0.160566	0.00136614	0.398675	0.908345	1035.19	47.4309	982.599	20.6917	959.92	13.0133	97%	959.92	13.0133	Qi et al. (2018)
16ZT-12-48	0.0757345	3.45331	1.88094	5.20063	0.179608	0.00149567	0.408163	0.915649	1087.96	43.5984	1074.39	21.8854	1064.83	14.2947	99%	1087.96	43.5984	Qi et al. (2018)
16ZT-12-49	0.0778546	3.45307	1.93694	5.06678	0.179793	0.00125201	0.369126	0.721161	1142.6	45.5016	1093.94	21.5988	1065.84	13.5863	97%	1142.6	45.5016	Qi et al. (2018)
16ZT-12-50	0.0947203	3.45358	3.26465	7.33614	0.247893	0.00242755	0.496275	0.610848	1524.08	36.2744	1472.67	28.1328	1427.6	20.1111	96%	1524.08	36.2744	Qi et al. (2018)
16ZT-12-51	0.0719046	3.45218	1.55707	4.43618	0.156417	0.00115342	0.423237	0.089901	983.335	38.2643	953.304	18.6846	936.835	12.157	98%	936.835	12.157	Qi et al. (2018)
16ZT-12-52	0.080142	3.45451	1.66105	5.42968	0.14903	0.00118054	0.317623	0.155658	1266.66	43.4399	993.777	22.4309	895.525	11.8801	89%	895.525	11.8801	Qi et al. (2018)
16ZT-12-53	0.126749	3.46593	5.72131	16.173	0.325353	0.00245508	0.273458	0.573403	2053.39	56.7702	1934.59	39.0983	1815.82	23.292	93%	2053.39	56.7702	Qi et al. (2018)
16ZT-12-54	0.0657216	3.45232	1.16358	4.18865	0.127782	0.00100283	0.399509	0.679817	798.15	38.2993	783.636	16.5095	775.198	10.2833	98%	775.198	10.2833	Qi et al. (2018)
16ZT-12-55	0.0760876	3.45415	1.98014	5.65938	0.187919	0.00160239	0.380334	0.551323	1098.15	47.792	1108.77	23.3255	1110.09	15.0027	99%	1098.15	47.792	Qi et al. (2018)
16ZT-12-56	0.0809854	3.45389	2.21473	5.62604	0.197507	0.00161242	0.41122	0.598476	1221.3	44.7651	1185.71	23.525	1161.91	15.4626	97%	1221.3	44.7651	Qi et al. (2018)
16ZT-12-57	0.075099	3.45585	1.85468	6.04654	0.178718	0.00164219	0.346141	0.431987	1072.22	56.3786	1065.1	24.4462	1059.96	14.7287	99%	1072.22	56.3786	Qi et al. (2018)
16ZT-12-58	0.0751722	3.45344	1.89678	5.17821	0.182361	0.00126661	0.346048	0.470938	1073.15	44.6348	1079.96	21.8448	1079.86	13.7523	99%	1073.15	44.6348	Qi et al. (2018)
16ZT-12-59	0.0746724	3.45294	1.8993	5.13606	0.183692	0.00140397	0.387154	0.208014	1061.12	42.4344	1080.84	21.7265	1087.12	14.2059	99%	1061.12	42.4344	Qi et al. (2018)
16ZT-12-60	0.172039	3.46064	11.4688	19.4423	0.481531	0.00327264	0.407604	0.654203	2577.47	48.8771	2562.04	43.8855	2533.93	31.3299	98%	2577.47	48.8771	Qi et al. (2018)
16ZT-12-61	0.120411	3.45559	5.78842	10.657	0.34745	0.0022314	0.369439	0.80302	1962.04	42.7443	1944.68	34.5892	1922.41	23.7111	98%	1962.04	42.7443	Qi et al. (2018)
16ZT-12-62	0.0724759	3.45291	1.63216	4.83603	0.163043	0.00106819	0.321436	0.206619	999.075	43.0503	982.694	20.3065	973.668	12.2492	99%	973.668	12.2492	Qi et al. (2018)
16ZT-12-63	0.0812405	3.45684	2.1355	6.68738	0.191329	0.00163593	0.320779	0.406683	1227.78	56.4578	1160.37	26.1744	1128.57	15.2593	97%	1227.78	56.4578	Qi et al. (2018)
16ZT-12-64	0.121321	3.46082	5.8355	14.6421	0.348339	0.00268055	0.315897	0.21779	1975.62	51.6854	1951.7	37.7198	1926.66	24.7887	98%	1975.62	51.6854	Qi et al. (2018)
16ZT-12-65	0.0687873	3.45384	1.48204	5.19285	0.15585	0.00123683	0.307332	0.0796017	892.28	50.9606	923.064	21.5319	933.672	12.3822	98%	933.672	12.3822	Qi et al. (2018)
16ZT-12-66	0.074691	3.4543	1.90702	5.80016	0.185109	0.00144783	0.323023	0.84703	1061.12	49.3123	1083.54	23.6903	1094.83	14.4017	98%	1061.12	49.3123	Qi et al. (2018)
16ZT-12-67	0.0738435	3.45402	1.86472	5.67509	0.182782	0.0014725	0.336867	0.660831	1038.89	49.1911	1068.66	23.2965	1082.15	14.3683	98%	1038.89	49.1911	Qi et al. (2018)
16ZT-12-68	0.0760632	3.45325	1.9417	5.38775	0.18441	0.00128846	0.331902	0.728731	1098.15	46.933	1095.59	22.5143	1091.02	13.9124	99%	1098.15	46.933	Qi et al. (2018)
16ZT-12-69	0.0725583	3.45292	1.58747	4.78881	0.158037	0.00110285	0.340057	1.26423	1011.11	43.8392	965.303	20.06	945.86	12.0915	97%	945.86	12.0915	Qi et al. (2018)
16ZT-12-70	0.0788224	3.45659	1.93678	6.1979	0.178404	0.00171636	0.364766	0.521496	1168.52	52.5135	1093.89	24.8758	1058.25	14.9664	96%	1168.52	52.5135	Qi et al. (2018)
16ZT-12-71	0.0847359	3.4542	2.57566	6.2829	0.219396	0.00149197	0.336122	0.391461	1309.26	44.173	1293.75	25.4605	1278.68	16.1408	98%	1309.26	44.173	Qi et al. (2018)
16ZT-12-72	0.0751507	3.45536	2.07442	6.42487	0.199428	0.00134114	0.259235	0.607987	1072.22	54.6168	1140.39	25.4834	1172.25	14.7862	97%	1072.22	54.6168	Qi et al. (2018)
16ZT-12-73	0.0796725	3.46082	2.33441	8.74148	0.211966	0.00167889	0.230955	0.600341	1190.74	70.0746	1222.82	31.2702	1239.28	16.3103	98%	1190.74	70.0746	Qi et al. (2018)
16ZT-12-74	0.0743562	3.46	1.75986	7.1625	0.171012	0.00132141	0.217802	0.560755	1050.93	67.8564	1030.8	28.2868	1017.68	13.3617	98%	1050.93	67.8564	Qi et al. (2018)
16ZT-12-75	0.0664271	3.45993	1.53995	7.03543	0.167532	0.00144143	0.217301	0.32163	820.37	79.7871	946.482	28.7034	998.499	13.5746	94%	998.499	13.5746	Qi et al. (2018)
16ZT-12-76	0.0771771	3.46702	1.94387	9.27038	0.182028	0.00124181	0.154556	0.960802	1125.62	90.6912	1096.33	34.4105	1078.05	13.6685	98%	1125.62	90.6912	Qi et al. (2018)
16ZT-12-77	0.0944449	3.47991	3.57355	17.5246	0.273143	0.00190958	0.145509	0.604034	1516.97	89.4653	1543.68	45.4328	1556.74	19.6833	99%	1516.97	89.4653	Qi et al. (2018)
16ZT-12-78	0.0558149	3.46301	0.812784	5.60924	0.104933	0.000849513	0.150391	0.522999	455.6	120.578	604.015	26.3471	643.256	8.64593	93%	643.256	8.64593	Qi et al. (2018)
16ZT-12-79	0.150984	3.55991	9.65754	56.1394	0.460795	0.00341273	0.127656	0.405275	2357.1	106.581	2402.67	65.8034	2443.07	30.8342	98%	2357.1	106.581	Qi et al. (2018)
16ZT-12-80	0.146553	3.54836	9.41403	53.2941	0.462805	0.00323903	0.123896	0.483142	2305.86	299.657	2379.2	64.3437	2451.93	30.5442	96%	2305.86	299.657	Qi et al. (2018)
16ZT-12-81	0.0748173	3.47206	2.14864	11.7176	0.207328	0.00170574	0.158123	0.409886	1064.82	106.469	1164.62	40.5906	1214.57	16.1826	95%	1064.82	106.469	Qi et al. (2018)
16ZT-12-82	0.0867238	3.47072	3.13346	14.1969	0.260083	0.00185719	0.162656	1.01374	1354.62	82.0832	1440.95	40.9194	1490.26	18.9644	96%	1354.62	82.0832	Qi et al. (2018)
16ZT-12-83	0.0796608	3.46951	1.80972	9.05283	0.164045	0.00139492	0.184411	0.90815	1188.58	93.1641	1048.98	34.5195	979.218	13.2657	93%	979.218	13.2657	Qi et al. (2018)
16ZT-12-84	0.0765373	3.45859	2.18568	7.83039	0.205309	0.00150421	0.228777	0.62472	1109.26	66.4563	1176.49	29.2014	1203.78	15.5075	97%	1109.26	66.4563	Qi et al. (2018)
16ZT-12-85	0.0714198	3.45528	1.82612	5.95874	0.183781	0.00123835	0.255538	0.0766861	968.515	57.6782	1054.89	24.1804	1087.6	13.7458	96%	968.515	57.6782	Qi et al. (2018)
16ZT-12-86	0.0715532	3.45507	1.77524	5.73142	0.178312	0.00132692	0.291567	0.481447	973.15	54.8753	1036.44	23.4585	1057.74	13.726	97%	973.15	54.8753	Qi et al. (2018)
16ZT-12-87	0.0721769	3.45602	1.58725	5.52484	0.158466	0.00148064	0.347599	0.370467	990.74	60.0042	965.219	22.7884	948.248	13.3021	98%	948.248	13.3021	Qi et al. (2018)
																		Qi et al. (2018)
Laohutang Fm, late Ediacaran, N 25°20'21", E 114°17'58"																		Qi et al. (2018)
16NX-13-01	0.0637866	3.45503	1.11617	4.73767	0.125789	0.00113775	0.317271	1.02204	744.45	62.2551	761.141	19.537	763.797	10.6397	99%	763.797	10.6397	Qi et al. (2018)
16NX-13-02	0.0695731	3.45577	1.22801	4.89144	0.127192	0.00114391	0.324184	1.98904	916.665	60.005	813.432	20.2669	771.826	10.7263	94%	771.826	10.7263	Qi et al. (2018)
16NX-13-03	0.0704351	3.45914	1.28754	5.70622	0.131889	0.00145182	0.315029	0.769976	942.59	74.8403	840.204	24.08	798.631	12.0718	94%	798.631	12.0718	Qi et al. (2018)
16NX-13-04	0.0705205	3.45227	1.56583	4.37668	0.159649	0.000922182	0.345954	0.663252	942.59	43.8783	956.775	18.4882	954.825	11.6987	99%	954.825	11.6987	Qi et al. (2018)
16NX-13-05	0.0785075	3.45758	2.00524	6.60085	0.184369	0.00154185	0.299978	1.59406	1161.12	60.3387	1117.28	26.0173	1090.8	14.6542	97%	1161.12	60.3387	Qi et al. (2018)
16NX-13-06	0.0721764	3.45512	1.5323	5.29667	0.153026	0.00139979	0.353356	0.990543	990.74	55.2623	943.42	21.9372	917.905	12.7844	97%	917.905	12.7844	Qi et al. (2018)
16NX-13-07	0.105259	3.45582	4.38357	8.91686	0.299732	0.00199645	0.356205	0.72796	1720.37	44.5489	1709.25	31.4369	1689.98	21.0823	98%	1720.37	44.5489	Qi et al. (2018)
16NX-13-08	0.0697542	3.45716	1.52444	5.96475	0.158055	0.0015893	0.317847	1.79939	920.37	68.2769	940.264	24.5563	945.961	13.6677	99%	945.961	13.6677	Qi et al. (2018)
16NX-13-09	0.179899	3.46622	12.6143	23.0552	0.505378	0.00345528	0.378487	0.41494	2653.71	52.4923	2651.28	45.7337	2636.87	32.5927	99%	2653.71	52.4923	Qi et al. (2018)
16NX-13-10	0.103618	3.4553	3.88631	7.73078	0.270748	0.00203949	0.42501	0.517248	1700	43.8661	1610.84	29.5016	1544.6	19.9103	95%	1700	43.8661	Qi et al. (2018)
16NX-13-11	0.0594369	4.10895	0.250167	12.7047	0.0455523	0.00535991	0.241076	0.770078	583.36	656.516	226.712	99.2375	287.157	33.1978	76%	287.157	33.1978	Qi et al. (2018)
16NX-13-12	0.109164	3.45584	4.65302	8.94713	0.308055	0.00235923	0.432996	2.51856	1787.04	44.7429	1758.84	31.8101	1731.13	22.3309	98%	1787.04	44.7429	Qi et al. (2018)
16NX-13-13	0.105644	3.45378	4.29421	7.41519	0.293135	0.00181623	0.407335	0.785115	1725.61	39.1631	1692.25	29.8559	1657.17	20.3733	97%	1725.61	39.1631	Qi et al. (2018)
16NX-13-14	0.181122	3.46175	12.0844	19.8066	0.481166	0.00348864	0.449476	0.468423	2664.82	53.0914	2610.98	44.4656	2532.34	31.7545	96%	2664.82	53.0914	Qi et al. (2018)
16NX-13-15	0.104984	3.45508	4.24157	8.30944	0.291639	0.0019902	0.384311	0.994273	1713.88	42.6878	1682.1	30.6354	1649.72	20.7066	98%	1713.88	42.6878	Qi et al. (2018)
16NX-13-16	0.0769563	3.45316	1.84245	5.03395	0.172734	0.00135704	0.401142	0.937754	1120.37	46.3562	1060.74	21.324	1027.16	13.5504	96%	1120.37	46.3562	Qi et al. (2018)
16NX-13-17	0.0797848	3.45728	2.06018	6.84923	0.186741	0.00183082	0.343419	1.53441	1191.66	58.7311	1135.68	26.6761	1103.7	15.7053	97%	1191.66	58.7311	Qi et al. (2018)
16NX-13-18	0.120124	3.45511	5.55339	9.8903	0.333563	0.00264655	0.476522	0.750788	1958.34	41.8716	1908.9	33.7606	1855.63	24.1106	97%	1958.34	41.8716	Qi et al. (2018)
16NX-13-19	0.0666045	3.45298	1.15298	4.38382	0.124846	0.000975809	0.343131	0.835813	825.61	42.3836	778.651	17.576	758.394	10.0517	97%	758.394	10.0517	Qi et al. (2018)
16NX-13-20	0.137987	3.49571	3.19738	15.0562	0.165021	0.00238492	0.315606	1.90643	2202.16	79.6676	1456.53	42.4095	984.622	17.0803	61%	984.622	17.0803	Qi et al. (2018)
16NX-13-21	0.0755676	3.45246	1.82667	4.6938	0.174737	0.00107996	0.362271	0.438944	1083.34	37.9787	1055.08	20.2684	1038.16	12.8782	98%	1083.34	37.9787	Qi et al. (2018)
16NX-13-22	0.0878666	3.45311	2.85066	5.94706	0.234432	0.00145931	0.369627	0.189007	1388.89	39.6791	1368.98	25.3159	1357.68	16.7825	99%	1388.89	39.6791	Qi et al. (2018)
16NX-13-23	0.144037	3.4598	8.05283	15.549	0.403777	0.00284056	0.373995	0.389881	2276.24	44.615	2236.97	39.6485	2186.41	27.3857	97%	2276.24	44.615	Qi et al. (2018)
16NX-13-24	0.0700754	3.45253	1.44258	4.45526	0.148857	0.00102247	0.361117	0.192283	931.48	37.359	906.793	18.466	894.553	11.4007	98%	894.553	11.4007	Qi et al. (2018)
16NX-13-25	0.11612	3.45701	5.28027	10.8358	0.328665	0.00241869	0.379047	0.325077	1898.15	45.8994	1865.68	34.1672	1831.91	23.3399	98%	1898.15	45.8994	Qi et al. (2018)
16NX-13-26	0.17496	3.46125	11.5259	19.4147	0.475678	0.00325363	0.412872	0.408379	2605.86	49.4254	2566.68	43.9219	2508.41	31.0677	97%	2605.86	49.4254	Qi et al. (2018)
16NX-13-27	0.0643812	3.46166	0.321005	3.78823	0.0364434	0.000431191	0.266533	1.24429	753.71	99.7963	282.675	11.8517	230.75	3.6947	79%	230.75	3.6947	Qi et al. (2018)
16NX-13-28	0.160177	3.45767	9.78416	14.5621	0.44085	0.00256925	0.40347	0.596032	2457.71	46.6808	2414.66	40.8949	2354.44	28.3637	97%	2457.71	46.6808	Qi et al. (2018)
16NX-13-29	0.0776515	3.4572	1.36199	5.1871	0.126957	0.00100375	0.281953	0.875826	1138.89	60.2302	872.725	21.5612	770.48	10.2455	87%	770.48	10.2455	Qi et al. (2018)
16NX-13-30	0.0748304	3.45294	1.66314	4.72021	0.160402	0.00115113	0.378187	0.720615	1064.82	42.0349	994.573	19.9619	959.012	12.3469	96%	959.012	12.3469	Qi et al. (2018)
16NX-13-31	0.0688085	3.45475	1.41655	5.09034	0.148831	0.00129509	0.334354	1.03858	894.445	55.5767	895.914	21.1142	894.408	12.2409	99%	894.408	12.2409	Qi et al. (2018)
16NX-13-32	0.168979	3.46119	10.5397	17.4821	0.449205	0.00294812	0.403895	1.01797	2547.83	49.5928	2483.42	42.5298	2391.72	29.4245	96%	2547.83	49.5928	Qi et al. (2018)
16NX-13-33	0.162122	3.46301	10.2278	19.2626	0.454443	0.00364532	0.43317	0.672585	2479.62	50.457	2455.6	42.8933	2414.97	31.1196	98%	2479.62	50.457	Qi et al. (2018)
16NX-13-34	0.184242	3.46257	10.6334	17.5767	0.415469	0.00297498	0.442096	0.377657	2691.66	50.5889	2491.63	42.6397	2239.88	28.1442	89%	2691.66	50.5889	Qi et al. (2018)
16NX-13-35	0.222848	3.47253	17.1317	34.0844	0.554147	0.00639104	0.582783	0.855682	3001.54	55.7911	2942.24	50.7996	2842.4	41.0205	96%	3001.54	55.7911	Qi et al. (2018)
16NX-13-36	0.074972	3.45436	1.84781	5.48929	0.17775	0.00131777	0.324585	0.64232	1133.34	54.0595	1062.65	22.7166	1054.67	13.6726	99%	1133.34	54.0595	Qi et al. (2018)
16NX-13-37	0.164517	3.4594	11.0674	17.1786	0.484466	0.00302499	0.410941	0.692495	2502.78	47.8731	2528.82	42.8984	2546.69	30.9712	99%	2502.78	47.8731	Qi et al. (2018)
16NX-13-38	0.238846	3.46806	19.8034	28.8629	0.596607	0.0033169	0.384307	0.280996	3112.04	55.0425	3081.8	51.296	3016.15	35.8157	97%	3112.04	55.0425	Qi et al. (2018)
16NX-13-39	0.0723695	3.45336	1.63474	4.88996	0.162626	0.00109444	0.323132	0.866222	998.15	45.4929	983.689	20.5018	971.356	12.2991	98%	971.356	12.2991	Qi et al. (2018)
16NX-13-40	0.0734107	3.4548	1.8038	5.68284	0.176936	0.00146814	0.334888	0.465142	1025.61	52.624	1046.83	23.3026	1050.22	14.087	99%	1025.61	52.624	Qi et al. (2018)
16NX-13-41	0.152447	3.46157	8.39807	15.3544	0.396469	0.00245963	0.348547	0.879729	2373.77	49.035	2274.97	39.8514	2152.76	26.2874	94%	2373.77	49.035	Qi et al. (2018)
16NX-13-42	0.0728374	3.45321	1.58809	4.69394	0.157224	0.00112327	0.364054	0.402162	1009.26	43.8283	965.547	19.7129	941.329	12.1091	97%	941.329	12.1091	Qi et al. (2018)
16NX-13-43	0.06266	3.45386	1.0621	4.43121	0.122517	0.00107781	0.345455	0.748523	698.16	56.662	734.857	17.7726	745.032	10.278	98%	745.032	10.278	Qi et al. (2018)
16NX-13-44	0.0791834	3.45423	1.78912	5.40005	0.16213	0.00107076	0.287931	0.490489	1176.86	42.3736	1041.5	22.3916	968.604	12.2096	92%	968.604	12.2096	Qi et al. (2018)
16NX-13-45	0.0698801	3.45298	1.55033	4.71359	0.159919	0.00103627	0.319321	0.488469	924.07	44.0645	950.624	19.7144	956.327	12.0041	99%	956.327	12.0041	Qi et al. (2018)
16NX-13-46	0	3.45	0	3.51	0	0									Error			Qi et al. (2018)
16NX-13-47	0.178595	3.46892	12.3267	24.8458	0.498685	0.00449725	0.451951	0.88607	2639.82	53.9996	2629.61	46.0934	2608.14	34.6306	99%	2639.82	53.9996	Qi et al. (2018)
16NX-13-48	0.0699761	3.47598	1.21824	9.21959	0.125734	0.00166596	0.189336	0.586514	927.775	125.419	808.969	41.1182	763.484	12.7166	94%	763.484	12.7166	Qi et al. (2018)
16NX-13-49	0.089996	3.45529	3.00789	7.23642	0.241158	0.00197676	0.389615	0.180081	1425.61	46.693	1409.62	27.688	1392.71	18.4574	98%	1425.61	46.693	Qi et al. (2018)
16NX-13-50	0.0730429	3.4526	1.73622	4.7462	0.171092	0.00113625	0.360924	0.0111756	1016.66	40.4545	1022.06	20.2102	1018.13	12.8394	99%	1016.66	40.4545	Qi et al. (2018)
16NX-13-51	0.0851872	3.45497	2.64391	6.69314	0.223786	0.00172369	0.357336	0.755729	1320.37	47.13	1312.95	26.3492	1301.85	16.9708	99%	1320.37	47.13	Qi et al. (2018)
16NX-13-52	0.215145	3.46588	17.088	26.8289	0.571641	0.00411305	0.46225	1.06618	2946.29	53.3584	2939.78	49.39	2914.56	36.2621	99%	2946.29	53.3584	Qi et al. (2018)
16NX-13-53	0.0677731	3.46047	1.21783	5.53991	0.130054	0.000933192	0.203879	0.612787	861.105	84.4613	808.782	23.512	788.175	10.1827	97%	788.175	10.1827	Qi et al. (2018)
16NX-13-54	0.161548	3.46984	10.0634	22.285	0.449966	0.00402081	0.408624	1.46515	2471.91	55.4678	2440.62	43.9953	2395.1	31.8645	98%	2471.91	55.4678	Qi et al. (2018)
16NX-13-55	0	3.45	0	3.51	0.0948844	0.000860841		1.36664				#VALUE!	584.36	8.19189	Error	584.36	8.19189	Qi et al. (2018)
16NX-13-56	0.10294	3.4559	4.18648	8.7306	0.293455	0.00210996	0.376548	0.594764	1679.63	44.6426	1671.38	31.0057	1658.77	21.0789	99%	1679.63	44.6426	Qi et al. (2018)
16NX-13-57	0.0678247	3.45735	1.11528	5.13765	0.118881	0.0010982	0.274615	0.944709	864.81	69.9007	760.711	21.7425	724.118	10.18	95%	724.118	10.18	Qi et al. (2018)
16NX-13-58	0.0616606	3.45756	1.02046	5.10817	0.120194	0.00144766	0.331181	1.29781	661.125	75.7324	714.147	21.8781	731.678	11.5904	97%	731.678	11.5904	Qi et al. (2018)
16NX-13-59	0.158527	3.45792	10.0555	15.0277	0.45698	0.00243697	0.366982	0.397566	2439.81	46.3561	2439.89	41.3139	2426.21	28.8139	99%	2439.81	46.3561	Qi et al. (2018)
16NX-13-60	0.0646296	3.45337	1.14814	4.43292	0.128303	0.00108838	0.35972	1.11312	761.115	46.9711	776.363	17.8429	778.178	10.5885	99%	778.178	10.5885	Qi et al. (2018)
16NX-13-61	0.105182	3.45741	4.0169	9.07825	0.27648	0.00240403	0.417182	0.729211	1717.59	52.3848	1637.62	31.2235	1573.61	21.16	96%	1717.59	52.3848	Qi et al. (2018)
16NX-13-62	0.160531	3.46162	9.68574	17.3654	0.435233	0.00316948	0.414735	0.481397	2461.41	49.4711	2405.35	41.7729	2329.27	29.3381	96%	2461.41	49.4711	Qi et al. (2018)
16NX-13-63	0.145824	3.4608	7.85806	14.8183	0.388757	0.00259454	0.364282	0.646721	2297.22	48.7994	2214.88	39.1211	2117.06	26.2425	95%	2297.22	48.7994	Qi et al. (2018)
16NX-13-64	0.0813368	3.45492	2.0419	6.18169	0.180241	0.00166284	0.370201	0.289222	1229.32	48.8819	1129.59	24.8143	1068.29	14.8631	94%	1229.32	48.8819	Qi et al. (2018)
16NX-13-65	0.163012	3.46171	10.0809	17.8322	0.446026	0.00304774	0.393996	0.469821	2487.34	49.4333	2442.22	42.2648	2377.56	29.4999	97%	2487.34	49.4333	Qi et al. (2018)
16NX-13-66	0.0721555	3.45253	1.61125	4.53041	0.161066	0.000947528	0.330923	0.177881	990.74	40.2872	974.594	19.1742	962.696	11.8358	98%	962.696	11.8358	Qi et al. (2018)
16NX-13-67	0.0765651	3.45462	1.91861	5.66059	0.180847	0.00129906	0.310332	1.07007	1109.26	54.9501	1087.58	23.2822	1071.6	13.7686	98%	1109.26	54.9501	Qi et al. (2018)
16NX-13-68	0.073969	3.4549	1.59917	5.28874	0.155924	0.00106662	0.276518	0.668076	1040.44	57.1101	969.886	21.9111	934.086	11.8833	96%	934.086	11.8833	Qi et al. (2018)
16NX-13-69	0.081064	3.45393	2.27289	5.78585	0.202088	0.0014728	0.360135	0.423121	1233.33	44.2958	1203.91	23.9863	1186.53	15.269	98%	1233.33	44.2958	Qi et al. (2018)
16NX-13-70	0.074521	3.45307	1.824	4.9735	0.176344	0.00118482	0.347804	0.590013	1057.41	42.4107	1054.13	21.1065	1046.97	13.2329	99%	1057.41	42.4107	Qi et al. (2018)
16NX-13-71	0.0767893	3.45361	2.03389	5.4782	0.19087	0.00166663	0.422239	0.540859	1116.66	48.7612	1126.92	22.8877	1126.09	15.3362	99%	1116.66	48.7612	Qi et al. (2018)
16NX-13-72	0.0588311	3.45801	0.71567	4.42363	0.0892066	0.000950749	0.28331	1.37675	561.145	92.0912	548.108	18.1915	550.843	8.27442	99%	550.843	8.27442	Qi et al. (2018)
16NX-13-73	0.0673402	3.47802	0.832452	6.25138	0.0904382	0.00174835	0.311098	2.46789	849.995	142.314	614.972	30.3087	552.128	12.0255	90%	552.128	12.0255	Qi et al. (2018)
16NX-13-74	0.0657367	3.45377	1.27333	4.6925	0.139545	0.00112526	0.32969	0.526569	798.15	53.3971	833.88	19.283	842.088	11.2486	99%	842.088	11.2486	Qi et al. (2018)
16NX-13-75	0.0692234	3.45329	1.52763	4.86788	0.158757	0.00108873	0.310606	1.25136	905.555	46.747	941.548	20.2716	949.867	12.088	99%	949.867	12.088	Qi et al. (2018)
16NX-13-76	0.157149	3.45863	10.04	16.2165	0.459635	0.0031313	0.432022	0.721528	2424.99	47.0086	2438.47	41.6772	2437.95	30.2019	99%	2424.99	47.0086	Qi et al. (2018)
16NX-13-77	0.0770246	3.45413	1.95193	5.50104	0.182526	0.00122025	0.308076	0.426472	1121.91	47.22	1099.11	22.8494	1080.76	13.6354	98%	1121.91	47.22	Qi et al. (2018)
16NX-13-78	0.0677923	3.45292	1.40484	4.57896	0.149044	0.00098296	0.315081	0.283433	861.105	45.7942	890.984	18.914	895.604	11.3004	99%	895.604	11.3004	Qi et al. (2018)
16NX-13-79	0.096602	3.49532	2.08573	17.0773	0.142205	0.00199546	0.175122	1.93483	1561.12	107.565	1144.12	57.9663	857.116	14.6949	71%	857.116	14.6949	Qi et al. (2018)
16NX-13-80	0.0834889	3.45664	2.37069	6.76864	0.204578	0.0017272	0.345837	0.336823	1280.56	54.0351	1233.81	26.3506	1199.87	16.1264	97%	1280.56	54.0351	Qi et al. (2018)
16NX-13-81	0.0678068	3.45464	1.54709	5.21042	0.163751	0.00119364	0.29286	0.363794	862.65	56.4945	949.334	21.6051	977.587	12.6346	97%	977.587	12.6346	Qi et al. (2018)
[truncated: 1,358 more rows]

## Sheet: Guangxi sub-basin
Table S3: U-Pb isotopic compositions and ages of detrital zircons from the Guangxi sub-basin
[truncated: 1,286 more rows]

[truncated: 2 more sheets: PlotDat3, PlotDat4]
