# Supplementary material
Source: publisher figshare collection journal article supplement (https://gsapubs.figshare.com/articles/dataset/_/12613640)
Supplement: Supplementary file 1 [file 1]

Er-Kun Xue, Wei Wang, Mei-Fu Zhou, Manoj. K. Pandit, Si-Fang Huang, and Gui-Mei Lu, 2020, Late Neoproterozoic–early Paleozoic basin evolution in the Cathaysia Block, South China: Implications of spatio-temporal provenance changes on the paleogeographic reconstructions in supercontinent cycles: *GSA Bulletin*, <https://doi.org/10.1130/B35588.1>.

## Supplemental Material

**Table S1:** Information of samples of detrital zircon U-Pb age from previous studies.

**Table S2:** Metadata of LA-MC-ICPMS U-Pb and Lu-Hf data used in this study.

**Table S3:** U-Pb isotopic compositions and ages of detrital zircons from the four sub-basins.

**Table S4:** LA(MC)-ICPMS Lu-Hf isotopic compositions for detrital zircons from the four sub-basins.

**Table S5:** Whole-rock major and trace elements of sedimentary rocks from the three sub-basins.

**Table S6:** Paleocurrent data from the four sub-basins.

**Table S7:** K-S test result of the age clusters.

### REFERENCES CITED IN TABLES S1–S7

- Blichert-Toft, J., and Albarede, F., 1997, The Lu-Hf isotope geochemistry of chondrites and the evolution of the mantle-crust system: *Earth and Planetary Science Letters*, v. 148, p. 243–258, [https://doi.org/10.1016/S0012-821X\(97\)00040-X](https://doi.org/10.1016/S0012-821X(97)00040-X).
- Gerdes, A., and Zeh, A., 2006, Combined U–Pb and Hf isotope LA-(MC-)ICP-MS analyses of detrital zircons: Comparison with SHRIMP and new constraints for the provenance and age of an Armorican metasediment in Central Germany: *Earth and Planetary Science Letters*, v. 249, p. 47–61, <https://doi.org/10.1016/j.epsl.2006.06.039>.
- Griffin, W.L., Pearson, N.J., Belousova, E., Jackson, S.E., van Acherbergh, E., O'Reilly, S.Y., and Shee, S.R., 2000, The Hf isotope composition of cratonic mantle: LAM-MC-ICPMS analysis of zircon megacrysts in kimberlites: *Geochimica et Cosmochimica Acta*, v. 64, no. 1, p. 133–147, [https://doi.org/10.1016/S0016-7037\(99\)00343-9](https://doi.org/10.1016/S0016-7037(99)00343-9).
- Qi, L., Xu, Y.J., Cawood, P.A., and Du, Y.S., 2018, Reconstructing Cryogenian to Ediacaran successions and paleogeography of the South China Block: *Precambrian Research*, v. 314, p. 452–467, <https://doi.org/10.1016/j.precamres.2018.07.003>.
- Wang, K., Li, Z.X., Dong, S., Cui, J., Han, B., Zheng, T., and Xu, Y., 2018a, Early crustal evolution of the Yangtze Craton, South China: New constraints from zircon U-Pb-Hf

- isotopes and geochemistry of ca. 2.9–2.6 Ga granitic rocks in the Zhongxiang Complex: *Precambrian Research*, v. 314, p. 325–352, <https://doi.org/10.1016/j.precamres.2018.05.016>.
- Wang, K.X., Sun, L.Q., Sun, T., Huang, H., and Qin, L.S., 2018b, Provenance, weathering conditions, and tectonic evolution history of the Cambrian meta-sediments in the Zhuguangshan area, Cathaysia Block: *Precambrian Research*, v. 311, p. 195–210, <https://doi.org/10.1016/j.precamres.2018.04.011>.
- Wang, W., Zeng, M.F., Zhou, M.F., Zhao, J.H., Zheng, J.P., and Lan, Z.F., 2018d, Age, provenance and tectonic setting of Neoproterozoic to early Paleozoic sequences in southeastern South China Block: Constraints on its linkage to western Australia-East Antarctica: *Precambrian Research*, v. 309, p. 290–308, <https://doi.org/10.1016/j.precamres.2017.03.002>.
- Wang, Y.J., Zhang, F.F., Fan, W.M., Zhang, G.W., Chen, S.Y., Cawood, P.A., and Zhang, A.M., 2010, Tectonic setting of the South China Block in the early Paleozoic: Resolving intracontinental and ocean closure models from detrital zircon U-Pb geochronology: *Tectonics*, v. 29, no. 6, <https://doi.org/10.1029/2010TC002750>.
- Wu, L., Jia, D., Li, H.B., Deng, F., and Li, Y.Q., 2010, Provenance of detrital zircons from the late Neoproterozoic to Ordovician sandstones of South China: implications for its continental affinity: *Geological Magazine*, v. 147, no. 06, p. 974–980, <https://doi.org/10.1017/S0016756810000725>.
- Wu, F.Y., Yang, Y.H., Xie, L.W., Yang, J.H., and Xu, P., 2006, Hf isotopic compositions of the standard zircons and baddeleyites used in U–Pb geochronology: *Chemical Geology*, v. 234, no. 1, p. 105–126, <https://doi.org/10.1016/j.chemgeo.2006.05.003>.
- Xiong, C., Chen, H.D., Niu, Y.L., Chen, A.Q., Zhang, C.G., Li, F., Xu, S.L., Yang, S., and Li, S., 2018, Provenance, depositional setting, and crustal evolution of the Cathaysia Block, South China: Insights from detrital zircon U-Pb geochronology and geochemistry of clastic rocks: *Geological Journal*, <https://doi.org/10.1002/gj.3253>.
- Xu, Y.J., Cawood, P.A., Du, Y.S., Hu, L.S., Yu, W.C., Zhu, Y.H., and Li, W.C., 2013, Linking south China to northern Australia and India on the margin of Gondwana: Constraints from detrital zircon U-Pb and Hf isotopes in Cambrian strata: *Tectonics*, v. 32, no. 6, p. 1547–1558, <https://doi.org/10.1002/tect.20099>.
- Xu, Y.J., Cawood, P.A., Du, Y.S., Huang, H.W., and Wang, X.Y., 2014a, Early Paleozoic orogenesis along Gondwana's northern margin constrained by provenance data from South China: *Tectonophysics*, v. 636, p. 40–51, <https://doi.org/10.1016/j.tecto.2014.08.022>.
- Xue, E.K., Wang, W., Huang, S.F., and Lu, G.M., 2019, Detrital zircon U-Pb-Hf isotopes and whole-rock geochemistry of neoproterozoic-cambrian successions in the Cathaysia Block of South China: Implications on paleogeographic reconstruction in supercontinent: *Precambrian Research*, v. 331, p. 105348, <https://doi.org/10.1016/j.precamres.2019.105348>.
- Yao, J.L., Shu, L.S., and Santosh, M., 2011, Detrital zircon U–Pb geochronology, Hf-isotopes and geochemistry—New clues for the Precambrian crustal evolution of Cathaysia Block, South China: *Gondwana Research*, v. 20, no. 2–3, p. 553–567, <https://doi.org/10.1016/j.gr.2011.01.005>.
- Yao, W.H., Li, Z.X., Li, W.X., Li, X.H., and Yang, J.H., 2014, From Rodinia to Gondwanaland: A tale of detrital zircon provenance analyses from the southern Nanhua Basin, South

- China: American Journal of Science, v. 314, no. 1, p. 278–313,  
<https://doi.org/10.2475/01.2014.08>.
- Yao, W.H., Li, Z.X., Li, W.X., Su, L., and Yang, J.H., 2015, Detrital provenance evolution of the Ediacaran–Silurian Nanhua foreland basin, South China: Gondwana Research, v. 28, no. 4, p. 1449–1465, <https://doi.org/10.1016/j.gr.2014.10.018>.
- Yuan, H.L., Gao, S., Dai, M.N., Zong, C.L., Günther, D., Fontaine, G.H., Liu, X.M., and Diwu, C., 2008, Simultaneous determinations of U–Pb age, Hf isotopes and trace element compositions of zircon by excimer laser-ablation quadrupole and multiple-collector ICP-MS: Chemical Geology, v. 247, no. 1, p. 100–118,  
<https://doi.org/10.1016/j.chemgeo.2007.10.003>.
